# Supplementary material for: The coast of giants: an anthropometric survey of high schoolers on the Adriatic coast of Croatia
Source: PeerJ journal article supplement (doi:10.7717/peerj.6598), 2019-04-17
Supplement: GRASGRUBER_THE_COAST_OF_GIANTS_Supplemental_tables_and_figures.pdf [file GRASGRUBER_THE_COAST_OF_GIANTS_Supplemental_tables_and_figures.pdf]

## **Supplemental tables and figures**

**Supplemental Table S1.** Proportion of various types of schools in the measured samples, by county.

| County ( <i>županija</i> ) | Available schools             |                                   |              |            | Measured schools              |                                   |              |                          |
|----------------------------|-------------------------------|-----------------------------------|--------------|------------|-------------------------------|-----------------------------------|--------------|--------------------------|
|                            | <i>Gimnazije</i> <sup>1</sup> | 'Mixed high schools' <sup>2</sup> | Other schols | TOTAL      | <i>Gimnazije</i> <sup>1</sup> | 'Mixed high schools' <sup>2</sup> | Other schols | TOTAL (% of all schools) |
| Split-Dalmacija            | 8                             | 9                                 | 27           | 44         | 2                             | 2                                 | 13           | 17 (38.6%)               |
| Dubrovnik-Neretva          | 4                             | 5                                 | 7            | 16         | 2                             | 2                                 | 3            | 7 (43.8%)                |
| Šibenik-Knin               | 2                             | 2                                 | 9            | 13         | 1                             | 2                                 | 7            | 10 (76.9%)               |
| Zadar                      | 5                             | 5                                 | 12           | 22         | 1                             | 2                                 | 3            | 6 (27.3%)                |
| Primorje-Gorski Kotar      | 5                             | 8                                 | 20           | 33         | 2                             | 0                                 | 4            | 6 (18.2%)                |
| Istra                      | 4                             | 9                                 | 13           | 26         | 2                             | 1                                 | 5            | 8 (30.8%)                |
| Lika-Senj                  | 1                             | 3                                 | 1            | 5          | 0                             | 3                                 | 1            | 4 (80.0%)                |
| Karlovac                   | 3                             | 2                                 | 9            | 14         | 2                             | 0                                 | 7            | 9 (64.3%)                |
| <b>TOTAL</b>               | <b>32</b>                     | <b>43</b>                         | <b>98</b>    | <b>173</b> | <b>12</b>                     | <b>12</b>                         | <b>43</b>    | <b>67 (38.7%)</b>        |

Notes: <sup>1</sup>*Gimnazije* = elite high schools. <sup>2</sup> 'Mixed high schools' (*Srednje škole*) = schools combining several different classes, usually *gimnazije* and economic schools.

**Supplemental Table S2.** Means of the measured schools. The data include both domestic high schoolers (Supplemental dataset, Sheets 1-2) and high schoolers coming from other regions (Supplemental dataset, Sheet 3-4).

| County (županija)<br>TOWN, school           | Males      |                         |                  |                    | Females    |                         |                  |                    |
|---------------------------------------------|------------|-------------------------|------------------|--------------------|------------|-------------------------|------------------|--------------------|
|                                             | n          | Age in<br>years<br>(SD) | Height (cm)      |                    | n          | Age in<br>years<br>(SD) | Height (cm)      |                    |
|                                             |            |                         | Mean<br>(SD)     | Maximum<br>Minimum |            |                         | Mean<br>(SD)     | Maximum<br>Minimum |
| <b>Split-Dalmacija</b>                      | <b>449</b> | <b>18.2±0.4</b>         | <b>184.0±6.9</b> | <b>165.0-204.5</b> | <b>155</b> | <b>18.5±0.5</b>         | <b>169.0±5.8</b> | <b>151.5-186.0</b> |
| IMOTSKI, Gimnazija & Ekonomska <sup>1</sup> | 24         | 18.5±0.3                | 185.7±6.8        | 171.2-201.8        | 28         | 18.7±0.3                | 170.6±5.8        | 151.5-179.6        |
| SPLIT, Graditeljsko-geodetska tehnička      | 34         | 18.4±0.5                | 185.5±5.8        | 174.4-200.4        |            |                         |                  |                    |
| SINJ, Tehnička i industrijska               | 63         | 18.4±0.3                | 185.1±7.4        | 165.0-204.5        | 8          | 18.1±0.2                | 167.0±4.8        | 158.2-174.0        |
| MAKARSKA, Srednja strukovna                 | 18         | 18.2±0.5                | 184.8±6.1        | 174.2-200.7        | 23         | 18.3±0.6                | 169.4±5.1        | 162.4-181.5        |
| TROGIR, SŠ Ivana Lučića                     | 29         | 18.1±0.3                | 184.4±6.1        | 168.6-196.6        |            |                         |                  |                    |
| MAKARSKA, Srednja škola                     | 28         | 18.6±0.3                | 184.4±7.0        | 169.0-200.6        |            |                         |                  |                    |
| IMOTSKI, Tehnička                           | 21         | 18.6±0.4                | 184.2±7.9        | 165.8-204.5        |            |                         |                  |                    |
| SPLIT, Ekonomsko-birotehnička               | 61         | 18.3±0.5                | 184.2±7.6        | 166.3-202.4        |            |                         |                  |                    |
| SPLIT, Prva gimnazija                       | 41         | 18.1±0.3                | 184.0±7.2        | 168.5-203.8        |            |                         |                  |                    |
| SPLIT, Zdravstvena                          | 10         | 18.8±0.5                | 183.5±4.9        | 175.1-183.5        | 41         | 18.7±0.6                | 169.4±5.8        | 155.0-180.7        |
| SINJ, Strukovna bana J. Jelačića            | 22         | 18.3±0.4                | 183.1±6.1        | 173.9-196.0        | 49         | 18.4±0.3                | 168.0±6.1        | 158.6-186.0        |
| IMOTSKI, Obrtničko-industrijska             | 16         | 17.9±0.2                | 182.6±4.4        | 172.8-190.5        | 6          | 17.6±0.2                | 167.1±2.9        | 163.5-171.3        |
| SPLIT, Tehnička škola za strojarstvo        | 14         | 17.9±0.3                | 182.4±6.3        | 171.9-192.7        |            |                         |                  |                    |
| SPLIT, Pomorska                             | 40         | 17.9±0.2                | 182.1±6.7        | 167.0-192.5        |            |                         |                  |                    |
| SPLIT, Škola za dizajn, grafiku             | 19         | 17.9±0.4                | 182.0±7.3        | 168.8-196.5        |            |                         |                  |                    |
| SPLIT, Likovnih umjetnosti                  | 9          | 18.3±0.4                | 181.1±5.5        | 168.3-187.0        |            |                         |                  |                    |
| <b>Dubrovnik-Neretva</b>                    | <b>242</b> | <b>18.4±0.4</b>         | <b>183.7±6.7</b> | <b>166.6-201.8</b> | <b>39</b>  | <b>18.4±0.2</b>         | <b>169.1±7.1</b> | <b>156.2-188.0</b> |
| METKOVIĆ, Gimnazija                         | 29         | 18.1±0.3                | 185.2±7.7        | 169.9-197.7        | 39         | 18.4±0.2                | 169.1±7.1        | 156.2-188.0        |
| DUBROVNIK, Pomorsko-tehnička                | 88         | 18.6±0.4                | 184.3±6.5        | 170.0-201.8        |            |                         |                  |                    |
| METKOVIĆ, Srednja škola                     | 30         | 18.0±0.2                | 183.7±5.8        | 172.4-196.8        |            |                         |                  |                    |
| DUBROVNIK, Turistička i ugostiteljska       | 21         | 18.5±0.3                | 183.3±5.0        | 175.0-193.9        |            |                         |                  |                    |
| DUBROVNIK, Ekonomska i trgovačka            | 16         | 18.7±0.5                | 183.2±7.2        | 172.5-198.1        |            |                         |                  |                    |
| DUBROVNIK, Gimnazija                        | 47         | 18.6±0.3                | 182.4±6.9        | 166.6-197.8        |            |                         |                  |                    |
| PLOČE, SŠ fra Andrije Kačića Miošića        | 11         | 18.0±0.3                | 181.7±7.2        | 175.1-196.2        |            |                         |                  |                    |
| <b>Šibenik-Knin</b>                         | <b>209</b> | <b>18.5±0.4</b>         | <b>183.4±6.6</b> | <b>163.5-205.5</b> | <b>74</b>  | <b>18.9±0.6</b>         | <b>167.9±5.1</b> | <b>156.0-179.2</b> |
| KNIN, Srednja škola Lovre Montija           | 14         | 18.6±0.4                | 185.0±5.9        | 176.8-195.7        |            |                         |                  |                    |
| DRNIŠ, SŠ I. Mestrovića                     | 42         | 18.4±0.3                | 184.4±7.2        | 167.2-203.4        |            |                         |                  |                    |
| ŠIBENIK, Ekonomska                          | 30         | 18.3±0.4                | 184.4±5.2        | 175.0-195.6        |            |                         |                  |                    |
| ŠIBENIK, Gimnazija A. Vrančića              | 26         | 18.4±0.3                | 184.1±5.7        | 167.1-193.5        |            |                         |                  |                    |
| ŠIBENIK, Prometno-tehnička                  | 34         | 18.5±0.4                | 184.0±7.7        | 169.8-205.5        |            |                         |                  |                    |
| ŠIBENIK, Turističko-ugostiteljska           | 19         | 18.4±0.4                | 182.5±5.9        | 172.0-192.5        | 23         | 18.3±0.3                | 167.9±5.3        | 158.5-179.2        |
| ŠIBENIK, Medicinska                         | 13         | 19.3±0.4                | 182.0±5.5        | 171.5-189.0        | 43         | 19.2±0.4                | 167.7±5.2        | 156.0-178.9        |
| KNIN, Sr. struk. škola Kralja Zvonimira     | 25         | 18.5±0.3                | 181.6±5.8        | 169.0-195.4        |            |                         |                  |                    |
| ŠIBENIK, Srednja strukovna                  | 1          | 18.2                    | 178.6            |                    | 8          | 19.0±0.7                | 168.8±4.0        | 161.8-174.3        |
| ŠIBENIK, Industrijsko-obrtnička             | 5          | 18.4±0.2                | 175.7±7.3        | 163.5-184.4        |            |                         |                  |                    |
| <b>Zadar</b>                                | <b>251</b> | <b>18.4±0.4</b>         | <b>182.7±6.1</b> | <b>167.1-200.7</b> | <b>19</b>  | <b>18.3±0.5</b>         | <b>168.1±6.8</b> | <b>151.4-183.0</b> |
| ZADAR, Gimnazija J. Barakovića              | 39         | 18.4±0.3                | 184.6±5.6        | 173.8-195.0        |            |                         |                  |                    |
| BENKOVAC, Sr. škola kneza Branimira         | 30         | 18.5±0.3                | 184.0±7.1        | 167.1-200.7        |            |                         |                  |                    |
| ZADAR, Pomorska                             | 57         | 18.5±0.5                | 182.5±5.1        | 170.9-190.9        |            |                         |                  |                    |
| ZADAR, Strukovna V. Vlatkovića              | 50         | 18.5±0.4                | 182.4±6.3        | 168.6-197.0        |            |                         |                  |                    |
| ZADAR, Tehnička                             | 62         | 18.4±0.3                | 182.0±6.1        | 171.5-198.0        |            |                         |                  |                    |
| GRAČAC, Srednja škola                       | 13         | 18.0±0.6                | 178.8±5.9        | 172.0-192.0        | 19         | 18.3±0.5                | 168.1±6.8        | 151.4-183.0        |

<sup>1</sup> Gimnazija and Ekonomska škola Imotski are located in the same building and their results are merged together.

| County (županija)<br>TOWN, school       | Males       |                         |                  |                    | Females    |                      |                  |                    |
|-----------------------------------------|-------------|-------------------------|------------------|--------------------|------------|----------------------|------------------|--------------------|
|                                         | n           | Age in<br>years<br>(SD) | Height (cm)      |                    | n          | Age in<br>years (SD) | Height (cm)      |                    |
|                                         |             |                         | Mean<br>(SD)     | Maximum<br>Minimum |            |                      | Mean<br>(SD)     | Maximum<br>Minimum |
| <b>Primorje-Gorski Kotar</b>            | <b>243</b>  | <b>18.7±0.4</b>         | <b>181.9±6.7</b> | <b>163.0-199.3</b> |            |                      |                  |                    |
| RIJEKA, Prometna                        | 19          | 18.8±0.5                | 183.5±7.5        | 172.7-198.4        |            |                      |                  |                    |
| RIJEKA, Prva riječka hrvat. gimnazija   | 60          | 18.7±0.5                | 183.3±6.6        | 166.6-199.3        |            |                      |                  |                    |
| RIJEKA, Građevinska tehnička            | 35          | 18.8±0.6                | 182.0±6.9        | 166.9-194.4        |            |                      |                  |                    |
| RIJEKA, Prva sušacka hrvat. gimnazija   | 27          | 18.6±0.3                | 181.5±6.6        | 169.3-193.3        |            |                      |                  |                    |
| RIJEKA, Prirodoslovna i grafička        | 43          | 18.7±0.4                | 181.4±6.4        | 167.8-198.0        |            |                      |                  |                    |
| BAKAR, Pomorska                         | 59          | 18.7±0.4                | 180.4±6.3        | 163.0-191.5        |            |                      |                  |                    |
| <b>Lika-Senj</b>                        | <b>82</b>   | <b>18.5±0.4</b>         | <b>181.2±7.0</b> | <b>165.5-196.7</b> | <b>49</b>  | <b>18.5±0.4</b>      | <b>167.6±5.8</b> | <b>152.3-180.2</b> |
| KORENICA, Sr. škola Plitvička jezera    | 11          | 18.5±0.4                | 183.5±4.4        | 174.5-191.0        | 16         | 18.6±0.3             | 167.9±6.3        | 153.6-180.2        |
| SENJ, Srednja škola P. Rittera          | 15          | 18.6±0.3                | 183.0±5.2        | 172.2-191.4        |            |                      |                  |                    |
| OTOČAC, Srednja škola                   | 19          | 18.6±0.5                | 181.3±8.0        | 166.5-196.7        | 22         | 18.5±0.4             | 167.0±5.4        | 152.3-177.1        |
| GOSPIĆ, Strukovna                       | 37          | 18.5±0.3                | 179.7±7.3        | 165.5-192.9        | 11         | 18.5±0.3             | 168.4±5.9        | 160.0-179.0        |
| <b>Istra</b>                            | <b>139</b>  | <b>18.6±0.4</b>         | <b>181.1±6.6</b> | <b>166.4-203.5</b> | <b>225</b> | <b>18.5±0.5</b>      | <b>166.7±6.7</b> | <b>148.2-182.6</b> |
| PULA, Tehnička                          | 13          | 18.4±0.3                | 183.0±4.9        | 171.7-190.5        | 5          | 18.5±0.3             | 158.8±3.1        | 152.9-162.2        |
| PULA, Primijenjenih umjetnosti, dizajna | 4           | 18.4                    | 182.9            | 175.0-187.8        | 21         | 18.0±0.7             | 164.1±4.5        | 152.8-171.2        |
| PULA, Ekonomska                         | 22          | 18.5±0.3                | 182.3±7.1        | 171.4-194.5        | 53         | 18.5±0.4             | 167.2±6.5        | 151.6-181.0        |
| PULA, Priv. gimnazija "Juraj Dobrila"   | 3           | 18.5                    | 182.0            | 175.1-194.3        |            |                      |                  |                    |
| PULA, Strukovna                         | 2           | 19.7                    | 181.4            | 179.2-183.5        | 24         | 18.7±0.5             | 168.8±8.1        | 148.2-178.9        |
| PULA, Medicinska                        | 18          | 18.9±0.4                | 180.6±4.7        | 166.4-187.7        | 30         | 19.0±0.7             | 167.0±6.9        | 150.3-182.6        |
| PULA, Gimnazija                         | 67          | 18.5±0.3                | 180.5±6.9        | 167.8-203.5        | 92         | 18.5±0.3             | 166.8±6.3        | 153.3-182.4        |
| PULA, Talijanska srednja                | 10          | 18.4±0.3                | 180.1±7.2        | 167.9-190.4        |            |                      |                  |                    |
| <b>Karlovac</b>                         | <b>212</b>  | <b>18.6±0.5</b>         | <b>180.4±6.2</b> | <b>162.0-195.3</b> | <b>231</b> | <b>18.6±0.4</b>      | <b>166.6±6.0</b> | <b>151.2-181.3</b> |
| KARLOVAC, Prirodoslovna                 | 8           | 18.3±0.3                | 185.3±6.6        | 175.0-195.3        | 27         | 18.6±0.4             | 167.3±5.3        | 157.8-176.0        |
| KARLOVAC, Ekonomsko-turistička          | 23          | 18.6±0.3                | 181.7±7.0        | 162.6-193.2        | 64         | 18.6±0.4             | 165.3±6.0        | 155.0-180.9        |
| KARLOVAC, Trgovačko-ugostiteljska       | 4           | 18.9                    | 181.5            | 176.6-186.7        | 16         | 18.8±0.6             | 167.3±7.2        | 155.0-181.3        |
| KARLOVAC, Gimnazija                     | 40          | 18.5±0.4                | 180.9±6.7        | 163.8-194.2        | 56         | 18.5±0.3             | 168.1±6.1        | 153.4-180.6        |
| OGULIN, Obrtnička i tehnička            | 41          | 18.4±0.3                | 180.4±6.2        | 167.8-195.2        |            |                      |                  |                    |
| KARLOVAC, Medicinska                    | 27          | 18.9±0.5                | 180.1±4.8        | 172.2-190.6        | 38         | 18.5±0.4             | 164.7±5.0        | 151.2-173.3        |
| KARLOVAC, Tehnička                      | 42          | 18.8±0.5                | 179.8±5.7        | 168.6-190.5        | 1          | 18.6                 | 166.9            |                    |
| KARLOVAC, Šumarska i drvodjeljska       | 21          | 18.7±0.6                | 178.7±5.6        | 162.0-190.3        | 4          | 18.7                 | 166.1            | 161.6-170.1        |
| OGULIN, Gimnazija B. Frankopana         | 6           | 18.8±0.3                | 175.6±3.4        | 171.1-180.7        | 25         | 18.4±0.3             | 168.1±6.0        | 155.4-178.5        |
| <b>TOTAL</b>                            | <b>1827</b> | <b>18.5±0.5</b>         | <b>182.7±6.7</b> | <b>162.0-205.5</b> | <b>792</b> | <b>18.6±0.5</b>      | <b>167.4±6.2</b> | <b>148.2-188.0</b> |

**Supplemental Table S3.** Population size in the targeted counties and mean height in the whole area, corrected for population size in counties.

|                       | <b>Population</b> | <b>% of total</b> | <b>Mean male height<br/>(cm)</b> | <b>Mean female<br/>height (cm)</b> |
|-----------------------|-------------------|-------------------|----------------------------------|------------------------------------|
| Istra                 | 208,055           | 13.5              | 181.1                            | 166.7                              |
| Karlovac              | 128,899           | 8.4               | 180.6                            | 166.6                              |
| Primorje-Gorski Kotar | 296,195           | 19.2              | 181.9                            | -                                  |
| Lika-Senj             | 50,927            | 3.3               | 181.0                            | 168.0                              |
| Zadar                 | 170,017           | 11.0              | 182.8                            | 167.5                              |
| Šibenik-Knin          | 109,375           | 7.1               | 183.4                            | 167.9                              |
| Split-Dalmacija       | 454,798           | 29.5              | 184.1                            | 168.9                              |
| Dubrovnik-Neretva     | 122,568           | 8.0               | 183.6                            | 169.1                              |
| <b>TOTAL</b>          | <b>1,540,834</b>  | <b>100.0</b>      | <b>183.6</b>                     | <b>168.0*</b>                      |

Note: \*The female mean does not include the county of Primorje-Gorski Kotar, from which only five girls were measured. After the inclusion of this county, the mean female height would marginally increase to 168.2 cm.

**Supplemental Table S4. Proportion of parents with university education.** Comparison of data reported by high schoolers with the official data from the Croatian Bureau of Statistics for 2011 ([www.dzs.hr](http://www.dzs.hr)).

| County (županija)              | DATA REPORTED BY HIGH SCHOOLERS |                          |            |                          | DATA BY <a href="http://www.dzs.hr">www.dzs.hr</a> (for 2011) |             |                 |             |
|--------------------------------|---------------------------------|--------------------------|------------|--------------------------|---------------------------------------------------------------|-------------|-----------------|-------------|
|                                | Males                           |                          | Females    |                          | % of adults with higher education in the county               |             |                 |             |
|                                | <i>n</i>                        | % univ. educated parents | <i>n</i>   | % univ. educated parents | All forms <sup>1</sup>                                        |             | University only |             |
|                                |                                 |                          |            | 35-39 years              | 40-44 years                                                   | 35-44 years | 40-44 years     |             |
| Split-Dalmacija                | 359*                            | 27.7                     | 54*        | 23.1                     | 22.9                                                          | 18.9        | 14.8            | 11.2        |
| Dubrovnik-Neretva              | 241                             | 34.0                     | 38*        | 30.3                     | 26.8                                                          | 20.1        | 15.6            | 11.4        |
| Šibenik-Knin                   | 193*                            | 21.5                     | 23*        | 34.8                     | 18.8                                                          | 14.5        | 11.3            | 7.7         |
| Zadar                          | 249                             | 18.9                     | 20         | 0.0                      | 21.6                                                          | 15.8        | 14.5            | 10.0        |
| <b>Four Dalmatian counties</b> | <b>1042</b>                     | <b>27.3</b>              | <b>135</b> | <b>23.7</b>              | <b>22.7</b>                                                   | <b>17.9</b> | <b>14.4</b>     | <b>11.0</b> |
| Primorje-Gorski Kotar          | 238                             | 29.6                     | 5          | 50.0                     | 27.0                                                          | 22.9        | 18.2            | 14.4        |
| Istra                          | 143                             | 32.9                     | 225        | 30.0                     | 22.7                                                          | 18.4        | 14.4            | 10.3        |
| Lika-Senj                      | 86                              | 16.3                     | 48         | 12.5                     | 15.0                                                          | 11.9        | 8.1             | 6.1         |
| Karlovac                       | 199                             | 25.1                     | 221*       | 21.0                     | 17.4                                                          | 14.6        | 10.3            | 8.0         |
| <b>Four northern counties</b>  | <b>666</b>                      | <b>25.9</b>              | <b>499</b> | <b>24.5</b>              | <b>23.1</b>                                                   | <b>19.2</b> | <b>14.9</b>     | <b>11.3</b> |
| <b>TOTAL</b>                   | <b>1708</b>                     | <b>26.4</b>              | <b>634</b> | <b>24.4</b>              | <b>22.9</b>                                                   | <b>18.5</b> | <b>14.6</b>     | <b>11.1</b> |

Note: \*Information on the education of parents was not available for all high schoolers in these counties. <sup>1</sup>Includes all forms of education higher than high school.

**Supplemental Table S5. Correlations between male and female height, and socioeconomic variables in eight counties. (See Supplemental Figures S1-S4 below)**

| <b>County (<i>županija</i>)</b> | <b>Male height (cm)<br/>in 8 counties</b> | <b>Female height<br/>(cm) in 8 counties</b> |
|---------------------------------|-------------------------------------------|---------------------------------------------|
| Net salary 1995-2000            | 0.36 (p=0.39)                             | 0.19 (p=0.65)                               |
| Net salary 2000-2014            | 0.02 (p=0.97)                             | 0.15 (p=0.72)                               |
| <b>Net salary 1995-2014</b>     | <b>0.07 (p=0.87)</b>                      | <b>0.15 (p=0.73)</b>                        |
| Unemployment 1998-2000          | 0.41 (p=0.31)                             | -0.04 (p=0.93)                              |
| Unemployment 2000-2014          | 0.32 (p=0.45)                             | 0.04 (p=0.93)                               |
| <b>Unemployment 1998-2014</b>   | <b>0.33 (p=0.42)</b>                      | <b>0.03 (p=0.95)</b>                        |

Source: Croatian Bureau of Statistics, [www.dzs.hr](http://www.dzs.hr)

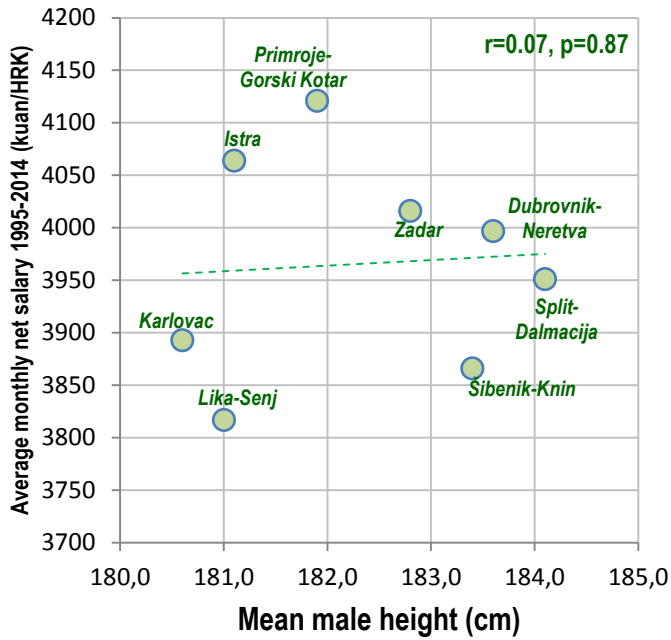

**Supplemental Figure S1.** Mean male height in eight counties and mean monthly net salary between 1995-2014.

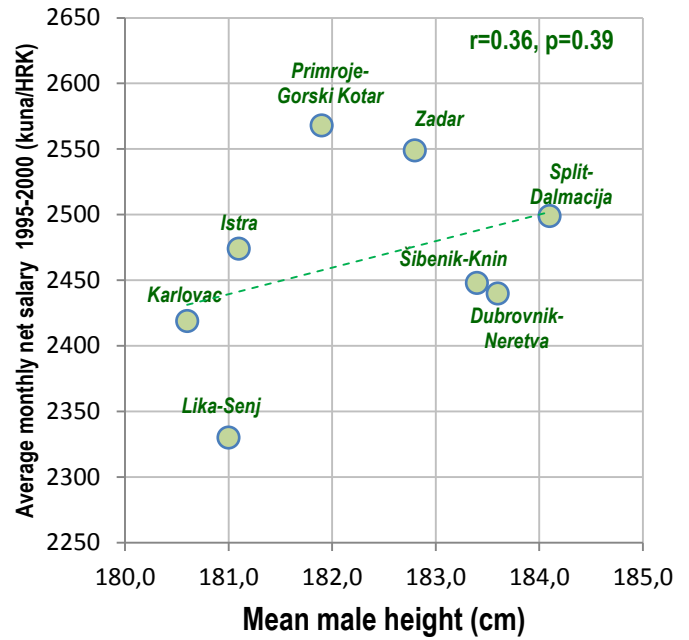

**Supplemental Figure S2.** Mean male height in eight counties and mean monthly net salary between 1995-2000.

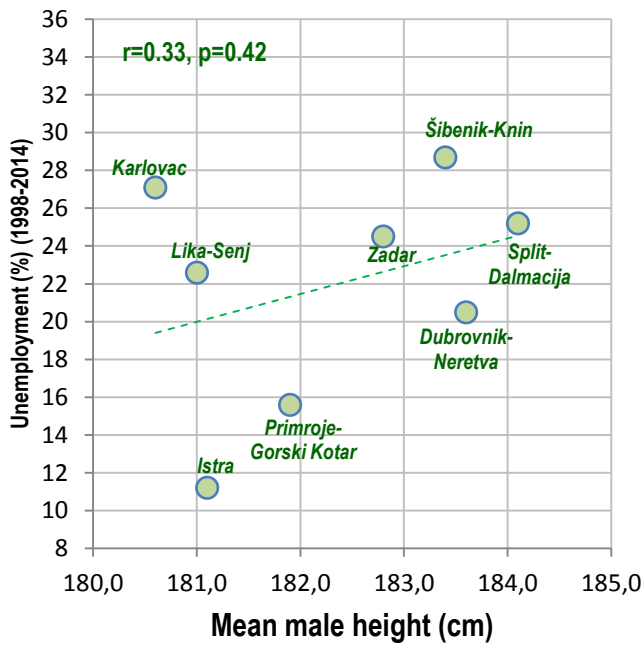

**Supplemental Figure S3.** Mean male height in eight counties and unemployment between 1998-2014.

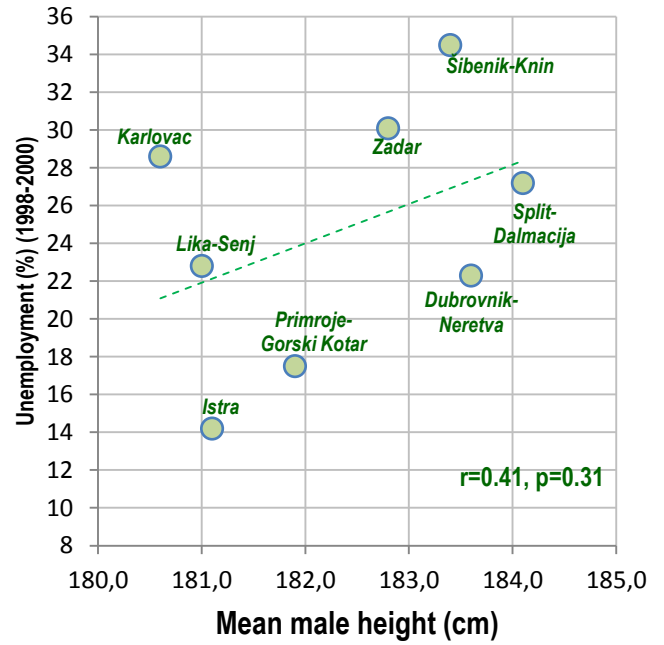

**Supplemental Figure S4.** Mean male height in eight counties and unemployment between 1998-2000.



**Supplemental Table S6. Multiple regression models of male height and two socioeconomic variables in eight counties, by different time periods.**

| MODELS                        | (1)                                      | (2)                                      | (3)                                                                                            |
|-------------------------------|------------------------------------------|------------------------------------------|------------------------------------------------------------------------------------------------|
| Net salary 1995-2000          | $b^* = 0.47$<br>$r = 0.49$<br>$p = 0.27$ |                                          |                                                                                                |
| Net salary 2000-2014          |                                          | $b^* = 0.81$<br>$r = 0.50$<br>$p = 0.26$ |                                                                                                |
| <b>Net salary 1995-2014</b>   |                                          |                                          | <b><math>b^* = 0.67</math></b><br><b><math>r = 0.48</math></b><br><b><math>p = 0.27</math></b> |
| Unemployment 1998-2000        | $b^* = 0.46$<br>$r = 0.47$<br>$p = 0.28$ |                                          |                                                                                                |
| Unemployment 2000-2014        |                                          | $b^* = 0.97$<br>$r = 0.57$<br>$p = 0.18$ |                                                                                                |
| <b>Unemployment 1998-2014</b> |                                          |                                          | <b><math>b^* = 0.82</math></b><br><b><math>r = 0.56</math></b><br><b><math>p = 0.19</math></b> |
| <b>Adj. R<sup>2</sup></b>     | <b>0.051</b>                             | <b>0.053</b>                             | <b>0.047</b>                                                                                   |
| <b>p-value</b>                | <b><math>p = 0.37</math></b>             | <b><math>p = 0.38</math></b>             | <b><math>p = 0.38</math></b>                                                                   |

Note:  $b^*$  = beta coefficient (displays how many standard deviations a dependent variable will change, per 1 standard deviation increase in the independent variable);  $r$  = partial correlation in the model;  $p$  = probability value.
