# Supplementary material for: The coast of giants: an anthropometric survey of high schoolers on the Adriatic coast of Croatia
Source: PeerJ. 2019 Apr 17;7:e6598. doi: 10.7717/peerj.6598 (PMC6475134; doi:10.7717/peerj.6598)
Supplement: Supplemental Information 2 [file peerj-07-6598-s002.xlsx]

## Sheet: 1_BOYS (domestic)
Region of the school (Županija)	School	School code	School type	Date of birth	Date of measurement	Age (years)	Age category	Place of residence	County of residence	Population size of the place of residence	University education of parents			Anthropometry
										1 (10 000 ≥)
										2 (10 001 - 25 000)
										3 (> 25 000)	Father	Mother	Total university education of both parents	Body height (cm)	Sitting height (cm)	Arm span (cm)	Relative sitting height (% body height)	Relative arm span (% body height)
Dubrovnik-Neretva	DUBROVNIK, Ekonomska i trgovačka	DUB_Dub_Ekon	OTHER	1998-02-04	2016-04-07	18.1711	18-20	DUBROVNIK	DUBROVNIK-NERETVA	3	YES	YES	BOTH PARENTS	172.5
Dubrovnik-Neretva	DUBROVNIK, Ekonomska i trgovačka	DUB_Dub_Ekon	OTHER	1997-07-05	2016-04-07	18.757	18-20	DUBROVNIK	DUBROVNIK-NERETVA	3	YES	YES	BOTH PARENTS	177.5
Dubrovnik-Neretva	DUBROVNIK, Ekonomska i trgovačka	DUB_Dub_Ekon	OTHER	1997-06-14	2016-04-07	18.8145	18-20	MOKOŠICA	DUBROVNIK-NERETVA	1	YES	YES	BOTH PARENTS	179.8
Dubrovnik-Neretva	DUBROVNIK, Ekonomska i trgovačka	DUB_Dub_Ekon	OTHER	1996-03-04	2016-04-07	20.0931	18-20	MOKOŠICA	DUBROVNIK-NERETVA	1	YES	YES	BOTH PARENTS	179.5
Dubrovnik-Neretva	DUBROVNIK, Ekonomska i trgovačka	DUB_Dub_Ekon	OTHER	1998-04-17	2016-04-07	17.974	17	GORICA	ZADAR	1	NO	NO	NEITHER	178.9
Dubrovnik-Neretva	DUBROVNIK, Ekonomska i trgovačka	DUB_Dub_Ekon	OTHER	1998-03-22	2016-04-07	18.0452	18-20	DUBROVNIK	DUBROVNIK-NERETVA	3	NO	NO	NEITHER	181
Dubrovnik-Neretva	DUBROVNIK, Ekonomska i trgovačka	DUB_Dub_Ekon	OTHER	1997-12-24	2016-04-07	18.2861	18-20	ČIBAČA	DUBROVNIK-NERETVA	1	NO	NO	NEITHER	180.6
Dubrovnik-Neretva	DUBROVNIK, Ekonomska i trgovačka	DUB_Dub_Ekon	OTHER	1997-09-25	2016-04-07	18.5325	18-20	GRUDA	DUBROVNIK-NERETVA	1	NO	NO	NEITHER	192
Dubrovnik-Neretva	DUBROVNIK, Ekonomska i trgovačka	DUB_Dub_Ekon	OTHER	1997-08-27	2016-04-07	18.6119	18-20	DUBROVNIK	DUBROVNIK-NERETVA	3	NO	NO	NEITHER	187
Dubrovnik-Neretva	DUBROVNIK, Ekonomska i trgovačka	DUB_Dub_Ekon	OTHER	1997-07-20	2016-04-07	18.7159	18-20	DUBROVNIK	DUBROVNIK-NERETVA	3	NO	NO	NEITHER	179.5
Dubrovnik-Neretva	DUBROVNIK, Ekonomska i trgovačka	DUB_Dub_Ekon	OTHER	1997-06-24	2016-04-07	18.7871	18-20	DUBROVNIK	DUBROVNIK-NERETVA	3	NO	NO	NEITHER	188.2
Dubrovnik-Neretva	DUBROVNIK, Ekonomska i trgovačka	DUB_Dub_Ekon	OTHER	1997-04-26	2016-04-07	18.9487	18-20	DUBROVNIK	DUBROVNIK-NERETVA	3	NO	NO	NEITHER	198.1
Dubrovnik-Neretva	DUBROVNIK, Ekonomska i trgovačka	DUB_Dub_Ekon	OTHER	1997-04-19	2016-04-07	18.9678	18-20	DUBROVNIK	DUBROVNIK-NERETVA	3	NO	NO	NEITHER	198.1
Dubrovnik-Neretva	DUBROVNIK, Ekonomska i trgovačka	DUB_Dub_Ekon	OTHER	1997-02-25	2016-04-07	19.1129	18-20	DUBROVNIK	DUBROVNIK-NERETVA	3	NO	NO	NEITHER	175.6
Dubrovnik-Neretva	DUBROVNIK, Ekonomska i trgovačka	DUB_Dub_Ekon	OTHER	1997-10-03	2016-04-07	18.5106	18-20	DUBROVNIK	DUBROVNIK-NERETVA	3	NO	YES	ONE PARENT	181.5
Dubrovnik-Neretva	DUBROVNIK, Ekonomska i trgovačka	DUB_Dub_Ekon	OTHER	1997-09-11	2016-04-07	18.5708	18-20	ČILIPI	DUBROVNIK-NERETVA	1	NO	YES	ONE PARENT	181.9
Dubrovnik-Neretva	DUBROVNIK, Gimnazija	DUB_Dub_Gim	GIMNAZIJA	1998-04-04	2016-04-07	18.0096	18-20	DUBROVNIK	DUBROVNIK-NERETVA	3	YES	YES	BOTH PARENTS	176.8
Dubrovnik-Neretva	DUBROVNIK, Gimnazija	DUB_Dub_Gim	GIMNAZIJA	1998-03-15	2016-04-07	18.0643	18-20	DUBROVNIK	DUBROVNIK-NERETVA	3	YES	YES	BOTH PARENTS	185.6
Dubrovnik-Neretva	DUBROVNIK, Gimnazija	DUB_Dub_Gim	GIMNAZIJA	1998-03-03	2016-04-07	18.0972	18-20	DUBROVNIK	DUBROVNIK-NERETVA	3	YES	YES	BOTH PARENTS	180.7
Dubrovnik-Neretva	DUBROVNIK, Gimnazija	DUB_Dub_Gim	GIMNAZIJA	1998-01-06	2016-04-07	18.2505	18-20	DUBROVNIK	DUBROVNIK-NERETVA	3	YES	YES	BOTH PARENTS	197.8
Dubrovnik-Neretva	DUBROVNIK, Gimnazija	DUB_Dub_Gim	GIMNAZIJA	1997-11-02	2016-04-07	18.4285	18-20	DUBROVNIK	DUBROVNIK-NERETVA	3	YES	YES	BOTH PARENTS	182.2
Dubrovnik-Neretva	DUBROVNIK, Gimnazija	DUB_Dub_Gim	GIMNAZIJA	1997-10-15	2016-04-07	18.4778	18-20	MOKOŠICA	DUBROVNIK-NERETVA	1	YES	YES	BOTH PARENTS	173.8
Dubrovnik-Neretva	DUBROVNIK, Gimnazija	DUB_Dub_Gim	GIMNAZIJA	1997-10-12	2016-04-07	18.486	18-20	DUBROVNIK	DUBROVNIK-NERETVA	3	YES	YES	BOTH PARENTS	177.7
Dubrovnik-Neretva	DUBROVNIK, Gimnazija	DUB_Dub_Gim	GIMNAZIJA	1997-10-02	2016-04-07	18.5133	18-20	DUBROVNIK	DUBROVNIK-NERETVA	3	YES	YES	BOTH PARENTS	180.5
Dubrovnik-Neretva	DUBROVNIK, Gimnazija	DUB_Dub_Gim	GIMNAZIJA	1997-09-13	2016-04-07	18.5654	18-20	DUBROVNIK	DUBROVNIK-NERETVA	3	YES	YES	BOTH PARENTS	190.9
Dubrovnik-Neretva	DUBROVNIK, Gimnazija	DUB_Dub_Gim	GIMNAZIJA	1997-06-01	2016-04-07	18.8501	18-20	DUBROVNIK	DUBROVNIK-NERETVA	3	YES	YES	BOTH PARENTS	184.5
Dubrovnik-Neretva	DUBROVNIK, Gimnazija	DUB_Dub_Gim	GIMNAZIJA	1997-04-23	2016-04-07	18.9569	18-20	DUBROVNIK	DUBROVNIK-NERETVA	3	YES	YES	BOTH PARENTS	186.4
Dubrovnik-Neretva	DUBROVNIK, Gimnazija	DUB_Dub_Gim	GIMNAZIJA	1996-09-08	2016-04-07	19.5784	18-20	DUBROVNIK	DUBROVNIK-NERETVA	3	YES	YES	BOTH PARENTS	183.7
Dubrovnik-Neretva	DUBROVNIK, Gimnazija	DUB_Dub_Gim	GIMNAZIJA	1998-04-09	2016-04-07	17.9959	18-20	DUBROVNIK	DUBROVNIK-NERETVA	3	NO	NO	NEITHER	188.1
Dubrovnik-Neretva	DUBROVNIK, Gimnazija	DUB_Dub_Gim	GIMNAZIJA	1998-01-07	2016-04-07	18.2478	18-20	DUBROVNIK	DUBROVNIK-NERETVA	3	NO	NO	NEITHER	187.5
Dubrovnik-Neretva	DUBROVNIK, Gimnazija	DUB_Dub_Gim	GIMNAZIJA	1997-12-30	2016-04-07	18.2697	18-20	DUBROVNIK	DUBROVNIK-NERETVA	3	NO	NO	NEITHER	169.5
Dubrovnik-Neretva	DUBROVNIK, Gimnazija	DUB_Dub_Gim	GIMNAZIJA	1997-11-18	2016-04-07	18.3847	18-20	DUBROVNIK	DUBROVNIK-NERETVA	3	NO	NO	NEITHER	188.8
Dubrovnik-Neretva	DUBROVNIK, Gimnazija	DUB_Dub_Gim	GIMNAZIJA	1997-10-28	2016-04-07	18.4422	18-20	DUBROVNIK	DUBROVNIK-NERETVA	3	NO	NO	NEITHER	188.5
Dubrovnik-Neretva	DUBROVNIK, Gimnazija	DUB_Dub_Gim	GIMNAZIJA	1997-10-12	2016-04-07	18.486	18-20	KUPARI	DUBROVNIK-NERETVA	1	NO	NO	NEITHER	183.1
Dubrovnik-Neretva	DUBROVNIK, Gimnazija	DUB_Dub_Gim	GIMNAZIJA	1997-10-07	2016-04-07	18.4997	18-20	DUBROVNIK	DUBROVNIK-NERETVA	3	NO	NO	NEITHER	176.4
Dubrovnik-Neretva	DUBROVNIK, Gimnazija	DUB_Dub_Gim	GIMNAZIJA	1997-09-24	2016-04-07	18.5352	18-20	DUBROVNIK	DUBROVNIK-NERETVA	3	NO	NO	NEITHER	181.6
Dubrovnik-Neretva	DUBROVNIK, Gimnazija	DUB_Dub_Gim	GIMNAZIJA	1997-09-13	2016-04-07	18.5654	18-20	ZATON	DUBROVNIK-NERETVA	1	NO	NO	NEITHER	166.6
Dubrovnik-Neretva	DUBROVNIK, Gimnazija	DUB_Dub_Gim	GIMNAZIJA	1997-06-28	2016-04-07	18.7762	18-20	DUBROVNIK	DUBROVNIK-NERETVA	3	NO	NO	NEITHER	174.9
Dubrovnik-Neretva	DUBROVNIK, Gimnazija	DUB_Dub_Gim	GIMNAZIJA	1997-06-22	2016-04-07	18.7926	18-20	KONAVLE	DUBROVNIK-NERETVA	1	NO	NO	NEITHER	188
Dubrovnik-Neretva	DUBROVNIK, Gimnazija	DUB_Dub_Gim	GIMNAZIJA	1997-05-30	2016-04-07	18.8556	18-20	DOLI	DUBROVNIK-NERETVA	1	NO	NO	NEITHER	180.5
Dubrovnik-Neretva	DUBROVNIK, Gimnazija	DUB_Dub_Gim	GIMNAZIJA	1997-05-20	2016-04-07	18.883	18-20	DUBROVNIK	DUBROVNIK-NERETVA	3	NO	NO	NEITHER	181.2
Dubrovnik-Neretva	DUBROVNIK, Gimnazija	DUB_Dub_Gim	GIMNAZIJA	1997-04-19	2016-04-07	18.9678	18-20	DUBROVNIK	DUBROVNIK-NERETVA	3	NO	NO	NEITHER	187.5
Dubrovnik-Neretva	DUBROVNIK, Gimnazija	DUB_Dub_Gim	GIMNAZIJA	1998-04-23	2016-04-07	17.9576	17	DUBROVNIK	DUBROVNIK-NERETVA	3	NO	YES	ONE PARENT	180.4
Dubrovnik-Neretva	DUBROVNIK, Gimnazija	DUB_Dub_Gim	GIMNAZIJA	1998-03-25	2016-04-07	18.037	18-20	DUBROVNIK	DUBROVNIK-NERETVA	3	YES	NO	ONE PARENT	188.6
Dubrovnik-Neretva	DUBROVNIK, Gimnazija	DUB_Dub_Gim	GIMNAZIJA	1998-02-07	2016-04-07	18.1629	18-20	DUBROVNIK	DUBROVNIK-NERETVA	3	YES	NO	ONE PARENT	173.3
Dubrovnik-Neretva	DUBROVNIK, Gimnazija	DUB_Dub_Gim	GIMNAZIJA	1998-02-01	2016-04-07	18.1793	18-20	DUBROVNIK	DUBROVNIK-NERETVA	3	NO	YES	ONE PARENT	185.9
Dubrovnik-Neretva	DUBROVNIK, Gimnazija	DUB_Dub_Gim	GIMNAZIJA	1998-01-07	2016-04-07	18.2478	18-20	DUBROVNIK	DUBROVNIK-NERETVA	3	YES	NO	ONE PARENT	179.7
Dubrovnik-Neretva	DUBROVNIK, Gimnazija	DUB_Dub_Gim	GIMNAZIJA	1997-12-24	2016-04-07	18.2861	18-20	DUBROVNIK	DUBROVNIK-NERETVA	3	YES	NO	ONE PARENT	187
Dubrovnik-Neretva	DUBROVNIK, Gimnazija	DUB_Dub_Gim	GIMNAZIJA	1997-11-30	2016-04-07	18.3518	18-20	DUBROVNIK	DUBROVNIK-NERETVA	3	YES	NO	ONE PARENT	174.7
Dubrovnik-Neretva	DUBROVNIK, Gimnazija	DUB_Dub_Gim	GIMNAZIJA	1997-11-27	2016-04-07	18.36	18-20	DUBROVNIK	DUBROVNIK-NERETVA	3	NO	YES	ONE PARENT	190.7
Dubrovnik-Neretva	DUBROVNIK, Gimnazija	DUB_Dub_Gim	GIMNAZIJA	1997-10-31	2016-04-07	18.4339	18-20	DUBROVNIK	DUBROVNIK-NERETVA	3	YES	NO	ONE PARENT	190.5
Dubrovnik-Neretva	DUBROVNIK, Gimnazija	DUB_Dub_Gim	GIMNAZIJA	1997-09-24	2016-04-07	18.5352	18-20	DUBROVNIK	DUBROVNIK-NERETVA	3	YES	NO	ONE PARENT	187.9
Dubrovnik-Neretva	DUBROVNIK, Gimnazija	DUB_Dub_Gim	GIMNAZIJA	1997-09-08	2016-04-07	18.5791	18-20	DUBROVNIK	DUBROVNIK-NERETVA	3	NO	YES	ONE PARENT	169
Dubrovnik-Neretva	DUBROVNIK, Gimnazija	DUB_Dub_Gim	GIMNAZIJA	1997-07-23	2016-04-07	18.7077	18-20	DUBROVNIK	DUBROVNIK-NERETVA	3	YES	NO	ONE PARENT	186.3
Dubrovnik-Neretva	DUBROVNIK, Gimnazija	DUB_Dub_Gim	GIMNAZIJA	1997-07-11	2016-04-07	18.7406	18-20	DUBROVNIK	DUBROVNIK-NERETVA	3	YES	NO	ONE PARENT	175.3
Dubrovnik-Neretva	DUBROVNIK, Gimnazija	DUB_Dub_Gim	GIMNAZIJA	1997-06-20	2016-04-07	18.7981	18-20	KONAVLE	DUBROVNIK-NERETVA	1	YES	NO	ONE PARENT	185.6
Dubrovnik-Neretva	DUBROVNIK, Gimnazija	DUB_Dub_Gim	GIMNAZIJA	1997-06-10	2016-04-07	18.8255	18-20	DUBROVNIK	DUBROVNIK-NERETVA	3	YES	NO	ONE PARENT	189.5
Dubrovnik-Neretva	DUBROVNIK, Gimnazija	DUB_Dub_Gim	GIMNAZIJA	1997-05-30	2016-04-07	18.8556	18-20	POTOMJE	DUBROVNIK-NERETVA	1	YES	NO	ONE PARENT	187.2
Dubrovnik-Neretva	DUBROVNIK, Gimnazija	DUB_Dub_Gim	GIMNAZIJA	1997-05-19	2016-04-07	18.8857	18-20	DUBROVNIK	DUBROVNIK-NERETVA	3	YES	NO	ONE PARENT	191.7
Dubrovnik-Neretva	DUBROVNIK, Gimnazija	DUB_Dub_Gim	GIMNAZIJA	1997-05-05	2016-04-07	18.924	18-20	DUBROVNIK	DUBROVNIK-NERETVA	3	YES	NO	ONE PARENT	180.1
Dubrovnik-Neretva	DUBROVNIK, Gimnazija	DUB_Dub_Gim	GIMNAZIJA	1997-04-30	2016-04-07	18.9377	18-20	BRGAT GORNJI	DUBROVNIK-NERETVA	1	YES	NO	ONE PARENT	180.5
Dubrovnik-Neretva	DUBROVNIK, Gimnazija	DUB_Dub_Gim	GIMNAZIJA	1997-04-28	2016-04-07	18.9432	18-20	DUBROVNIK	DUBROVNIK-NERETVA	3	YES	NO	ONE PARENT	169.3
Dubrovnik-Neretva	DUBROVNIK, Gimnazija	DUB_Dub_Gim	GIMNAZIJA	1997-02-12	2016-04-07	19.1485	18-20	DUBROVNIK	DUBROVNIK-NERETVA	3	NO	YES	ONE PARENT	175.6
Dubrovnik-Neretva	DUBROVNIK, Pomorsko-tehnička	DUB_Dub_Pom	OTHER	1997-05-01	2015-04-15	17.9548	17	DUBROVNIK	DUBROVNIK-NERETVA	3	YES	YES	BOTH PARENTS	188.8	94.1	180.7	49.8411	95.7097
Dubrovnik-Neretva	DUBROVNIK, Pomorsko-tehnička	DUB_Dub_Pom	OTHER	1997-02-18	2015-04-15	18.152	18-20	DUBROVNIK	DUBROVNIK-NERETVA	3	YES	YES	BOTH PARENTS	174.5	94	173.5	53.8682	99.4269
Dubrovnik-Neretva	DUBROVNIK, Pomorsko-tehnička	DUB_Dub_Pom	OTHER	1997-01-27	2015-04-15	18.2122	18-20	DUBROVNIK	DUBROVNIK-NERETVA	3	YES	YES	BOTH PARENTS	174.6	89.6	173.4	51.3173	99.3127
Dubrovnik-Neretva	DUBROVNIK, Pomorsko-tehnička	DUB_Dub_Pom	OTHER	1997-01-18	2015-04-15	18.2368	18-20	DUBROVNIK	DUBROVNIK-NERETVA	3	YES	YES	BOTH PARENTS	185.1	95.5	186.8	51.5937	100.918
Dubrovnik-Neretva	DUBROVNIK, Pomorsko-tehnička	DUB_Dub_Pom	OTHER	1997-01-09	2015-04-15	18.2615	18-20	DUBROVNIK	DUBROVNIK-NERETVA	3	YES	YES	BOTH PARENTS	183.3	93.9	184.5	51.2275	100.655
Dubrovnik-Neretva	DUBROVNIK, Pomorsko-tehnička	DUB_Dub_Pom	OTHER	1996-10-14	2015-04-15	18.4997	18-20	DUBROVNIK	DUBROVNIK-NERETVA	3	YES	YES	BOTH PARENTS	180.5	93.1	186.1	51.5789	103.102
Dubrovnik-Neretva	DUBROVNIK, Pomorsko-tehnička	DUB_Dub_Pom	OTHER	1996-10-03	2015-04-15	18.5298	18-20	DUBROVNIK	DUBROVNIK-NERETVA	3	YES	YES	BOTH PARENTS	188.5	96.8	192.3	51.3528	102.016
Dubrovnik-Neretva	DUBROVNIK, Pomorsko-tehnička	DUB_Dub_Pom	OTHER	1996-09-29	2015-04-15	18.5407	18-20	DUBROVNIK	DUBROVNIK-NERETVA	3	YES	YES	BOTH PARENTS	183	97.2	179.9	53.1148	98.306
Dubrovnik-Neretva	DUBROVNIK, Pomorsko-tehnička	DUB_Dub_Pom	OTHER	1996-09-26	2015-04-15	18.5489	18-20	DUBROVNIK	DUBROVNIK-NERETVA	3	YES	YES	BOTH PARENTS	176.6	94.3	171.6	53.3975	97.1687
Dubrovnik-Neretva	DUBROVNIK, Pomorsko-tehnička	DUB_Dub_Pom	OTHER	1996-09-03	2015-04-15	18.6119	18-20	DUBROVNIK	DUBROVNIK-NERETVA	3	YES	YES	BOTH PARENTS	183.5	93.3	183.6	50.8447	100.054
Dubrovnik-Neretva	DUBROVNIK, Pomorsko-tehnička	DUB_Dub_Pom	OTHER	1996-08-08	2015-04-15	18.6831	18-20	DUBROVNIK	DUBROVNIK-NERETVA	3	YES	YES	BOTH PARENTS	181	95.6	182.2	52.8177	100.663
Dubrovnik-Neretva	DUBROVNIK, Pomorsko-tehnička	DUB_Dub_Pom	OTHER	1996-07-28	2015-04-15	18.7132	18-20	DUBROVNIK	DUBROVNIK-NERETVA	3	YES	YES	BOTH PARENTS	201	100.7	198.3	50.0995	98.6567
Dubrovnik-Neretva	DUBROVNIK, Pomorsko-tehnička	DUB_Dub_Pom	OTHER	1996-07-26	2015-04-15	18.7187	18-20	DUBROVNIK	DUBROVNIK-NERETVA	3	YES	YES	BOTH PARENTS	180.2	96.2	186.6	53.3851	103.552
Dubrovnik-Neretva	DUBROVNIK, Pomorsko-tehnička	DUB_Dub_Pom	OTHER	1996-05-25	2015-04-15	18.8884	18-20	DUBROVNIK	DUBROVNIK-NERETVA	3	YES	YES	BOTH PARENTS	181.5	92.7	191.1	51.0744	105.289
Dubrovnik-Neretva	DUBROVNIK, Pomorsko-tehnička	DUB_Dub_Pom	OTHER	1996-05-11	2015-04-15	18.9268	18-20	DUBROVNIK	DUBROVNIK-NERETVA	3	YES	YES	BOTH PARENTS	184.5	93	183.5	50.4065	99.458
Dubrovnik-Neretva	DUBROVNIK, Pomorsko-tehnička	DUB_Dub_Pom	OTHER	1996-04-26	2015-04-15	18.9678	18-20	GRUDA	DUBROVNIK-NERETVA	1	YES	YES	BOTH PARENTS	183.5	96.3	186.7	52.4796	101.744
Dubrovnik-Neretva	DUBROVNIK, Pomorsko-tehnička	DUB_Dub_Pom	OTHER	1996-04-10	2015-04-15	19.0116	18-20	DUBROVNIK	DUBROVNIK-NERETVA	3	YES	YES	BOTH PARENTS	186.6	96.3	184.3	51.6077	98.7674
Dubrovnik-Neretva	DUBROVNIK, Pomorsko-tehnička	DUB_Dub_Pom	OTHER	1996-03-02	2015-04-15	19.1184	18-20	DUBROVNIK	DUBROVNIK-NERETVA	3	YES	YES	BOTH PARENTS	192.5	98.3	193.7	51.0649	100.623
Dubrovnik-Neretva	DUBROVNIK, Pomorsko-tehnička	DUB_Dub_Pom	OTHER	1996-02-18	2015-04-15	19.154	18-20	DUBROVNIK	DUBROVNIK-NERETVA	3	YES	YES	BOTH PARENTS	186	98	184.9	52.6882	99.4086
Dubrovnik-Neretva	DUBROVNIK, Pomorsko-tehnička	DUB_Dub_Pom	OTHER	1995-10-16	2015-04-15	19.4962	18-20	DUBROVNIK	DUBROVNIK-NERETVA	3	YES	YES	BOTH PARENTS	185.9	93.7	184.8	50.4034	99.4083
Dubrovnik-Neretva	DUBROVNIK, Pomorsko-tehnička	DUB_Dub_Pom	OTHER	1995-10-16	2015-04-15	19.4962	18-20	DUBROVNIK	DUBROVNIK-NERETVA	3	YES	YES	BOTH PARENTS	171.8	90.1	176.6	52.4447	102.794
Dubrovnik-Neretva	DUBROVNIK, Pomorsko-tehnička	DUB_Dub_Pom	OTHER	1995-09-03	2015-04-15	19.614	18-20	DUBROVNIK	DUBROVNIK-NERETVA	3	YES	YES	BOTH PARENTS	181.3	95.7	183.1	52.7854	100.993
Dubrovnik-Neretva	DUBROVNIK, Pomorsko-tehnička	DUB_Dub_Pom	OTHER	1997-05-28	2015-04-15	17.8809	17	DUBROVNIK	DUBROVNIK-NERETVA	3	NO	NO	NEITHER	193.3	96.3	196.3	49.8189	101.552
Dubrovnik-Neretva	DUBROVNIK, Pomorsko-tehnička	DUB_Dub_Pom	OTHER	1997-04-04	2015-04-15	18.0287	18-20	DUBROVNIK	DUBROVNIK-NERETVA	3	NO	NO	NEITHER	186.9	99.6	189.5	53.2905	101.391
Dubrovnik-Neretva	DUBROVNIK, Pomorsko-tehnička	DUB_Dub_Pom	OTHER	1997-04-02	2015-04-15	18.0342	18-20	ČIBAČA	DUBROVNIK-NERETVA	1	NO	NO	NEITHER	193.4	100	193.1	51.7063	99.8449
Dubrovnik-Neretva	DUBROVNIK, Pomorsko-tehnička	DUB_Dub_Pom	OTHER	1997-03-30	2015-04-15	18.0424	18-20	DUBROVNIK	DUBROVNIK-NERETVA	3	NO	NO	NEITHER	186.7	95.8	195.3	51.3123	104.606
Dubrovnik-Neretva	DUBROVNIK, Pomorsko-tehnička	DUB_Dub_Pom	OTHER	1997-03-25	2015-04-15	18.0561	18-20	DUBROVNIK	DUBROVNIK-NERETVA	3	NO	NO	NEITHER	181.6	96.2	183.3	52.9736	100.936
Dubrovnik-Neretva	DUBROVNIK, Pomorsko-tehnička	DUB_Dub_Pom	OTHER	1997-03-18	2015-04-15	18.0753	18-20	DUBROVNIK	DUBROVNIK-NERETVA	3	NO	NO	NEITHER	181.7	94	180.1	51.7336	99.1194
Dubrovnik-Neretva	DUBROVNIK, Pomorsko-tehnička	DUB_Dub_Pom	OTHER	1997-03-17	2015-04-15	18.078	18-20	DUBROVNIK	DUBROVNIK-NERETVA	3	NO	NO	NEITHER	185	98.2	180.9	53.0811	97.7838
Dubrovnik-Neretva	DUBROVNIK, Pomorsko-tehnička	DUB_Dub_Pom	OTHER	1997-03-11	2015-04-15	18.0945	18-20	DUBROVNIK	DUBROVNIK-NERETVA	3	NO	NO	NEITHER	186.3	93.6	196.7	50.2415	105.582
Dubrovnik-Neretva	DUBROVNIK, Pomorsko-tehnička	DUB_Dub_Pom	OTHER	1997-02-17	2015-04-15	18.1547	18-20	DUBROVNIK	DUBROVNIK-NERETVA	3	NO	NO	NEITHER	181	96.3	175.4	53.2044	96.9061
Dubrovnik-Neretva	DUBROVNIK, Pomorsko-tehnička	DUB_Dub_Pom	OTHER	1997-01-28	2015-04-15	18.2094	18-20	SUDURAD	DUBROVNIK-NERETVA	1	NO	NO	NEITHER	179.1	92.5	186.4	51.6471	104.076
Dubrovnik-Neretva	DUBROVNIK, Pomorsko-tehnička	DUB_Dub_Pom	OTHER	1996-12-29	2015-04-15	18.2916	18-20	DUBROVNIK	DUBROVNIK-NERETVA	3	NO	NO	NEITHER	180.8	95	175.1	52.5442	96.8473
Dubrovnik-Neretva	DUBROVNIK, Pomorsko-tehnička	DUB_Dub_Pom	OTHER	1996-11-22	2015-04-15	18.3929	18-20	DUBROVNIK	DUBROVNIK-NERETVA	3	NO	NO	NEITHER	190.3	100	188.7	52.5486	99.1592
Dubrovnik-Neretva	DUBROVNIK, Pomorsko-tehnička	DUB_Dub_Pom	OTHER	1996-11-18	2015-04-15	18.4038	18-20	DUBROVNIK	DUBROVNIK-NERETVA	3	NO	NO	NEITHER	184.7	93.6	177.6	50.6768	96.1559
Dubrovnik-Neretva	DUBROVNIK, Pomorsko-tehnička	DUB_Dub_Pom	OTHER	1996-10-22	2015-04-15	18.4778	18-20	DUBROVNIK	DUBROVNIK-NERETVA	3	NO	NO	NEITHER	185.6	96	179.3	51.7241	96.6056
Dubrovnik-Neretva	DUBROVNIK, Pomorsko-tehnička	DUB_Dub_Pom	OTHER	1996-10-13	2015-04-15	18.5024	18-20	DUBROVNIK	DUBROVNIK-NERETVA	3	NO	NO	NEITHER	192.2	100.2	195.6	52.1332	101.769
Dubrovnik-Neretva	DUBROVNIK, Pomorsko-tehnička	DUB_Dub_Pom	OTHER	1996-10-08	2015-04-15	18.5161	18-20	DUBROVNIK	DUBROVNIK-NERETVA	3	NO	NO	NEITHER	188.8	96.2	198.9	50.9534	105.35
Dubrovnik-Neretva	DUBROVNIK, Pomorsko-tehnička	DUB_Dub_Pom	OTHER	1996-10-07	2015-04-15	18.5188	18-20	DUBROVNIK	DUBROVNIK-NERETVA	3	NO	NO	NEITHER	181.4	95.6	175.5	52.7012	96.7475
Dubrovnik-Neretva	DUBROVNIK, Pomorsko-tehnička	DUB_Dub_Pom	OTHER	1996-09-28	2015-04-15	18.5435	18-20	DUBROVNIK	DUBROVNIK-NERETVA	3	NO	NO	NEITHER	191.3	102.3	195.7	53.4762	102.3
Dubrovnik-Neretva	DUBROVNIK, Pomorsko-tehnička	DUB_Dub_Pom	OTHER	1996-09-19	2015-04-15	18.5681	18-20	DUBROVNIK	DUBROVNIK-NERETVA	3	NO	NO	NEITHER	180.3	91.3	179.9	50.6378	99.7781
Dubrovnik-Neretva	DUBROVNIK, Pomorsko-tehnička	DUB_Dub_Pom	OTHER	1996-09-16	2015-04-15	18.5763	18-20	DUBROVNIK	DUBROVNIK-NERETVA	3	NO	NO	NEITHER	180	89.9	182.5	49.9444	101.389
Dubrovnik-Neretva	DUBROVNIK, Pomorsko-tehnička	DUB_Dub_Pom	OTHER	1996-09-08	2015-04-15	18.5982	18-20	DUBROVNIK	DUBROVNIK-NERETVA	3	NO	NO	NEITHER	170.7	93.7	170.4	54.8916	99.8243
Dubrovnik-Neretva	DUBROVNIK, Pomorsko-tehnička	DUB_Dub_Pom	OTHER	1996-09-03	2015-04-15	18.6119	18-20	ORAŠAC	DUBROVNIK-NERETVA	1	NO	NO	NEITHER	187.8	98.8	188.8	52.6092	100.532
Dubrovnik-Neretva	DUBROVNIK, Pomorsko-tehnička	DUB_Dub_Pom	OTHER	1996-08-17	2015-04-15	18.6585	18-20	DUBROVNIK	DUBROVNIK-NERETVA	3	NO	NO	NEITHER	179.9	92.5	177.9	51.4175	98.8883
Dubrovnik-Neretva	DUBROVNIK, Pomorsko-tehnička	DUB_Dub_Pom	OTHER	1996-08-11	2015-04-15	18.6749	18-20	DUBROVNIK	DUBROVNIK-NERETVA	3	NO	NO	NEITHER	186.9	95.4	192.3	51.0433	102.889
Dubrovnik-Neretva	DUBROVNIK, Pomorsko-tehnička	DUB_Dub_Pom	OTHER	1996-08-09	2015-04-15	18.6804	18-20	TRPANJ	DUBROVNIK-NERETVA	1	NO	NO	NEITHER	180.3	94.8	178.1	52.579	98.7798
Dubrovnik-Neretva	DUBROVNIK, Pomorsko-tehnička	DUB_Dub_Pom	OTHER	1996-08-05	2015-04-15	18.6913	18-20	DUBROVNIK	DUBROVNIK-NERETVA	3	NO	NO	NEITHER	177.5	88.2	181.9	49.6901	102.479
Dubrovnik-Neretva	DUBROVNIK, Pomorsko-tehnička	DUB_Dub_Pom	OTHER	1996-07-26	2015-04-15	18.7187	18-20	DUBROVNIK	DUBROVNIK-NERETVA	3	NO	NO	NEITHER	177.1	94.4	178	53.3032	100.508
Dubrovnik-Neretva	DUBROVNIK, Pomorsko-tehnička	DUB_Dub_Pom	OTHER	1996-07-08	2015-04-15	18.768	18-20	OTOK	SPLIT-DALMACIJA	1	NO	NO	NEITHER	194.6	101.5	185.7	52.1583	95.4265
Dubrovnik-Neretva	DUBROVNIK, Pomorsko-tehnička	DUB_Dub_Pom	OTHER	1996-06-27	2015-04-15	18.7981	18-20	DUBROVNIK	DUBROVNIK-NERETVA	3	NO	NO	NEITHER	179.7	94.2	181.2	52.4207	100.835
Dubrovnik-Neretva	DUBROVNIK, Pomorsko-tehnička	DUB_Dub_Pom	OTHER	1996-06-23	2015-04-15	18.809	18-20	DUBROVNIK	DUBROVNIK-NERETVA	3	NO	NO	NEITHER	178.1	92.3	184.7	51.8248	103.706
Dubrovnik-Neretva	DUBROVNIK, Pomorsko-tehnička	DUB_Dub_Pom	OTHER	1996-06-13	2015-04-15	18.8364	18-20	DUBROVNIK	DUBROVNIK-NERETVA	3	NO	NO	NEITHER	188.1	101.5	191.3	53.9607	101.701
Dubrovnik-Neretva	DUBROVNIK, Pomorsko-tehnička	DUB_Dub_Pom	OTHER	1996-06-10	2015-04-15	18.8446	18-20	SLANO	DUBROVNIK-NERETVA	1	NO	NO	NEITHER	182.3	97.2	184.5	53.3187	101.207
Dubrovnik-Neretva	DUBROVNIK, Pomorsko-tehnička	DUB_Dub_Pom	OTHER	1996-06-08	2015-04-15	18.8501	18-20	DUBROVNIK	DUBROVNIK-NERETVA	3	NO	NO	NEITHER	184.2	97	185.2	52.6602	100.543
Dubrovnik-Neretva	DUBROVNIK, Pomorsko-tehnička	DUB_Dub_Pom	OTHER	1996-06-06	2015-04-15	18.8556	18-20	DUBROVNIK	DUBROVNIK-NERETVA	3	NO	NO	NEITHER	185.8	93.6	180.5	50.3767	97.1475
Dubrovnik-Neretva	DUBROVNIK, Pomorsko-tehnička	DUB_Dub_Pom	OTHER	1995-08-15	2015-04-15	19.666	18-20	DUBROVNIK	DUBROVNIK-NERETVA	3	NO	NO	NEITHER	184.4	97.4	185.5	52.82	100.597
Dubrovnik-Neretva	DUBROVNIK, Pomorsko-tehnička	DUB_Dub_Pom	OTHER	1995-06-21	2015-04-15	19.8166	18-20	KOLOČE	DUBROVNIK-NERETVA	1	NO	NO	NEITHER	181	95.3	182.6	52.6519	100.884
Dubrovnik-Neretva	DUBROVNIK, Pomorsko-tehnička	DUB_Dub_Pom	OTHER	1995-05-04	2015-04-15	19.948	18-20	KOMIN	DUBROVNIK-NERETVA	1	NO	NO	NEITHER	192.6	99.1	187.6	51.4538	97.4039
Dubrovnik-Neretva	DUBROVNIK, Pomorsko-tehnička	DUB_Dub_Pom	OTHER	1997-05-23	2015-04-15	17.8946	17	DUBROVNIK	DUBROVNIK-NERETVA	3	YES	NO	ONE PARENT	189.4	97	191	51.2144	100.845
Dubrovnik-Neretva	DUBROVNIK, Pomorsko-tehnička	DUB_Dub_Pom	OTHER	1997-04-17	2015-04-15	17.9932	17	DUBROVNIK	DUBROVNIK-NERETVA	3	NO	YES	ONE PARENT	179.4	97.4	180.7	54.2921	100.725
Dubrovnik-Neretva	DUBROVNIK, Pomorsko-tehnička	DUB_Dub_Pom	OTHER	1997-03-12	2015-04-15	18.0917	18-20	DUBROVNIK	DUBROVNIK-NERETVA	3	YES	NO	ONE PARENT	172.5	95.3	169.8	55.2464	98.4348
Dubrovnik-Neretva	DUBROVNIK, Pomorsko-tehnička	DUB_Dub_Pom	OTHER	1997-02-25	2015-04-15	18.1328	18-20	KOMIN	DUBROVNIK-NERETVA	1	YES	NO	ONE PARENT	188.6	99.6	184	52.8102	97.561
Dubrovnik-Neretva	DUBROVNIK, Pomorsko-tehnička	DUB_Dub_Pom	OTHER	1997-02-07	2015-04-15	18.1821	18-20	DUBROVNIK	DUBROVNIK-NERETVA	3	YES	NO	ONE PARENT	177.3	95.6	179.2	53.9199	101.072
Dubrovnik-Neretva	DUBROVNIK, Pomorsko-tehnička	DUB_Dub_Pom	OTHER	1997-02-04	2015-04-15	18.1903	18-20	DUBROVNIK	DUBROVNIK-NERETVA	3	NO	YES	ONE PARENT	178.3	94.6	180	53.0566	100.953
Dubrovnik-Neretva	DUBROVNIK, Pomorsko-tehnička	DUB_Dub_Pom	OTHER	1997-01-27	2015-04-15	18.2122	18-20	KONAVLE	DUBROVNIK-NERETVA	1	NO	YES	ONE PARENT	182.4	91.6	187.2	50.2193	102.632
Dubrovnik-Neretva	DUBROVNIK, Pomorsko-tehnička	DUB_Dub_Pom	OTHER	1997-01-11	2015-04-15	18.256	18-20	DUBROVNIK	DUBROVNIK-NERETVA	3	NO	YES	ONE PARENT	185.4	97.2	191.6	52.4272	103.344
Dubrovnik-Neretva	DUBROVNIK, Pomorsko-tehnička	DUB_Dub_Pom	OTHER	1997-01-06	2015-04-15	18.2697	18-20	DUBROVNIK	DUBROVNIK-NERETVA	3	YES	NO	ONE PARENT	182.4	91.3	182.2	50.0548	99.8904
Dubrovnik-Neretva	DUBROVNIK, Pomorsko-tehnička	DUB_Dub_Pom	OTHER	1996-12-25	2015-04-15	18.3025	18-20	DUBROVNIK	DUBROVNIK-NERETVA	3	NO	YES	ONE PARENT	193.1	98.1	193.5	50.8027	100.207
Dubrovnik-Neretva	DUBROVNIK, Pomorsko-tehnička	DUB_Dub_Pom	OTHER	1996-12-19	2015-04-15	18.319	18-20	DUBROVNIK	DUBROVNIK-NERETVA	3	NO	YES	ONE PARENT	190.7	102.6	191.4	53.8018	100.367
Dubrovnik-Neretva	DUBROVNIK, Pomorsko-tehnička	DUB_Dub_Pom	OTHER	1996-12-17	2015-04-15	18.3244	18-20	DUBROVNIK	DUBROVNIK-NERETVA	3	YES	NO	ONE PARENT	194.8	100.8	195.8	51.7454	100.513
Dubrovnik-Neretva	DUBROVNIK, Pomorsko-tehnička	DUB_Dub_Pom	OTHER	1996-11-12	2015-04-15	18.4203	18-20	DUBROVNIK	DUBROVNIK-NERETVA	3	YES	NO	ONE PARENT	189.9	102	179.2	53.7125	94.3655
Dubrovnik-Neretva	DUBROVNIK, Pomorsko-tehnička	DUB_Dub_Pom	OTHER	1996-10-02	2015-04-15	18.5325	18-20	DUBROVNIK	DUBROVNIK-NERETVA	3	NO	YES	ONE PARENT	189.5	99.3	189.6	52.4011	100.053
Dubrovnik-Neretva	DUBROVNIK, Pomorsko-tehnička	DUB_Dub_Pom	OTHER	1996-09-21	2015-04-15	18.5626	18-20	DUBROVNIK	DUBROVNIK-NERETVA	3	NO	YES	ONE PARENT	171.2	90	174	52.5701	101.636
Dubrovnik-Neretva	DUBROVNIK, Pomorsko-tehnička	DUB_Dub_Pom	OTHER	1996-09-19	2015-04-15	18.5681	18-20	MOKOŠICA	DUBROVNIK-NERETVA	1	YES	NO	ONE PARENT	176.7	89.4	179.4	50.5942	101.528
Dubrovnik-Neretva	DUBROVNIK, Pomorsko-tehnička	DUB_Dub_Pom	OTHER	1996-08-28	2015-04-15	18.6283	18-20	DUBROVNIK	DUBROVNIK-NERETVA	3	YES	NO	ONE PARENT	201.8	105.5	198.3	52.2795	98.2656
Dubrovnik-Neretva	DUBROVNIK, Pomorsko-tehnička	DUB_Dub_Pom	OTHER	1996-08-07	2015-04-15	18.6858	18-20	DUBROVNIK	DUBROVNIK-NERETVA	3	NO	YES	ONE PARENT	182.2	93.3	184.4	51.2075	101.207
Dubrovnik-Neretva	DUBROVNIK, Pomorsko-tehnička	DUB_Dub_Pom	OTHER	1996-07-22	2015-04-15	18.7296	18-20	DUBROVNIK	DUBROVNIK-NERETVA	3	YES	NO	ONE PARENT	186.5	97.6	190.5	52.3324	102.145
Dubrovnik-Neretva	DUBROVNIK, Pomorsko-tehnička	DUB_Dub_Pom	OTHER	1996-06-30	2015-04-15	18.7899	18-20	DUBROVNIK	DUBROVNIK-NERETVA	3	YES	NO	ONE PARENT	189.6	97.5	191.3	51.4241	100.897
Dubrovnik-Neretva	DUBROVNIK, Pomorsko-tehnička	DUB_Dub_Pom	OTHER	1996-06-22	2015-04-15	18.8118	18-20	DUBROVNIK	DUBROVNIK-NERETVA	3	YES	NO	ONE PARENT	184.3	96.8	186.5	52.5231	101.194
Dubrovnik-Neretva	DUBROVNIK, Pomorsko-tehnička	DUB_Dub_Pom	OTHER	1996-06-06	2015-04-15	18.8556	18-20	BRGAT GORNJI	DUBROVNIK-NERETVA	1	YES	NO	ONE PARENT	182	96.1	182.4	52.8022	100.22
Dubrovnik-Neretva	DUBROVNIK, Pomorsko-tehnička	DUB_Dub_Pom	OTHER	1996-06-01	2015-04-15	18.8693	18-20	CAVTAT	DUBROVNIK-NERETVA	1	YES	NO	ONE PARENT	173.6	92.4	170.3	53.2258	98.0991
Dubrovnik-Neretva	DUBROVNIK, Pomorsko-tehnička	DUB_Dub_Pom	OTHER	1996-05-17	2015-04-15	18.9103	18-20	POTOMJE	DUBROVNIK-NERETVA	1	YES	NO	ONE PARENT	182.7	94.3	185	51.6147	101.259
Dubrovnik-Neretva	DUBROVNIK, Pomorsko-tehnička	DUB_Dub_Pom	OTHER	1996-05-16	2015-04-15	18.9131	18-20	DUBROVNIK	DUBROVNIK-NERETVA	3	YES	NO	ONE PARENT	192	100	193.4	52.0833	100.729
Dubrovnik-Neretva	DUBROVNIK, Pomorsko-tehnička	DUB_Dub_Pom	OTHER	1996-05-08	2015-04-15	18.935	18-20	OREBIĆ	DUBROVNIK-NERETVA	1	NO	YES	ONE PARENT	198.8	96.8	207.5	48.6922	104.376
Dubrovnik-Neretva	DUBROVNIK, Pomorsko-tehnička	DUB_Dub_Pom	OTHER	1996-04-08	2015-04-15	19.0171	18-20	DUBROVNIK	DUBROVNIK-NERETVA	3	NO	YES	ONE PARENT	170	92.5	169.8	54.4118	99.8824
Dubrovnik-Neretva	DUBROVNIK, Pomorsko-tehnička	DUB_Dub_Pom	OTHER	1996-01-10	2015-04-15	19.2608	18-20	DUBROVNIK	DUBROVNIK-NERETVA	3	NO	YES	ONE PARENT	193.3	103.3	188.6	53.4402	97.5685
Dubrovnik-Neretva	DUBROVNIK, Pomorsko-tehnička	DUB_Dub_Pom	OTHER	1996-01-03	2015-04-15	19.2799	18-20	DUBROVNIK	DUBROVNIK-NERETVA	3	NO	YES	ONE PARENT	184.4	92.5	172.5	50.1627	93.5466
Dubrovnik-Neretva	DUBROVNIK, Turistička i ugostiteljska	DUB_Dub_Tur	OTHER	1998-01-04	2016-04-07	18.256	18-20	MOKOŠICA	DUBROVNIK-NERETVA	1	YES	YES	BOTH PARENTS	175.9
Dubrovnik-Neretva	DUBROVNIK, Turistička i ugostiteljska	DUB_Dub_Tur	OTHER	1998-08-10	2016-04-07	17.6591	17	PELJEŠAC	DUBROVNIK-NERETVA	1	NO	NO	NEITHER	185.7
Dubrovnik-Neretva	DUBROVNIK, Turistička i ugostiteljska	DUB_Dub_Tur	OTHER	1998-02-16	2016-04-07	18.1383	18-20	DUBROVNIK	DUBROVNIK-NERETVA	3	NO	NO	NEITHER	186.7
Dubrovnik-Neretva	DUBROVNIK, Turistička i ugostiteljska	DUB_Dub_Tur	OTHER	1998-02-15	2016-04-07	18.141	18-20	DUBROVNIK	DUBROVNIK-NERETVA	3	NO	NO	NEITHER	181.3
Dubrovnik-Neretva	DUBROVNIK, Turistička i ugostiteljska	DUB_Dub_Tur	OTHER	1998-01-18	2016-04-07	18.2177	18-20	MOKOŠICA	DUBROVNIK-NERETVA	1	NO	NO	NEITHER	188.1
Dubrovnik-Neretva	DUBROVNIK, Turistička i ugostiteljska	DUB_Dub_Tur	OTHER	1998-01-03	2016-04-07	18.2587	18-20	DUBROVNIK	DUBROVNIK-NERETVA	3	NO	NO	NEITHER	179.5
Dubrovnik-Neretva	DUBROVNIK, Turistička i ugostiteljska	DUB_Dub_Tur	OTHER	1997-11-04	2016-04-07	18.423	18-20	DUBROVNIK	DUBROVNIK-NERETVA	3	NO	NO	NEITHER	180.1
Dubrovnik-Neretva	DUBROVNIK, Turistička i ugostiteljska	DUB_Dub_Tur	OTHER	1997-10-06	2016-04-07	18.5024	18-20	DUBROVNIK	DUBROVNIK-NERETVA	3	NO	NO	NEITHER	189.3
Dubrovnik-Neretva	DUBROVNIK, Turistička i ugostiteljska	DUB_Dub_Tur	OTHER	1997-09-21	2016-04-07	18.5435	18-20	ORAŠAC	DUBROVNIK-NERETVA	1	NO	NO	NEITHER	182
Dubrovnik-Neretva	DUBROVNIK, Turistička i ugostiteljska	DUB_Dub_Tur	OTHER	1997-09-08	2016-04-07	18.5791	18-20	DUBROVNIK	DUBROVNIK-NERETVA	3	NO	NO	NEITHER	187.7
Dubrovnik-Neretva	DUBROVNIK, Turistička i ugostiteljska	DUB_Dub_Tur	OTHER	1997-07-26	2016-04-07	18.6995	18-20	MOKOŠICA	DUBROVNIK-NERETVA	1	NO	NO	NEITHER	184
Dubrovnik-Neretva	DUBROVNIK, Turistička i ugostiteljska	DUB_Dub_Tur	OTHER	1997-07-07	2016-04-07	18.7515	18-20	MOKOŠICA	DUBROVNIK-NERETVA	1	NO	NO	NEITHER	175
Dubrovnik-Neretva	DUBROVNIK, Turistička i ugostiteljska	DUB_Dub_Tur	OTHER	1997-05-21	2016-04-07	18.8802	18-20	CAVTAT	DUBROVNIK-NERETVA	1	NO	NO	NEITHER	178.5
Dubrovnik-Neretva	DUBROVNIK, Turistička i ugostiteljska	DUB_Dub_Tur	OTHER	1997-05-20	2016-04-07	18.883	18-20	DUBROVNIK	DUBROVNIK-NERETVA	3	NO	NO	NEITHER	184.5
Dubrovnik-Neretva	DUBROVNIK, Turistička i ugostiteljska	DUB_Dub_Tur	OTHER	1998-02-19	2016-04-07	18.13	18-20	DUBROVNIK	DUBROVNIK-NERETVA	3	YES	NO	ONE PARENT	184.2
Dubrovnik-Neretva	DUBROVNIK, Turistička i ugostiteljska	DUB_Dub_Tur	OTHER	1998-02-18	2016-04-07	18.1328	18-20	ZATON	DUBROVNIK-NERETVA	1	NO	YES	ONE PARENT	180
Dubrovnik-Neretva	DUBROVNIK, Turistička i ugostiteljska	DUB_Dub_Tur	OTHER	1997-09-29	2016-04-07	18.5216	18-20	DUBROVNIK	DUBROVNIK-NERETVA	3	NO	YES	ONE PARENT	193.9
Dubrovnik-Neretva	DUBROVNIK, Turistička i ugostiteljska	DUB_Dub_Tur	OTHER	1997-09-23	2016-04-07	18.538	18-20	DUBROVNIK	DUBROVNIK-NERETVA	3	NO	YES	ONE PARENT	190.7
Dubrovnik-Neretva	DUBROVNIK, Turistička i ugostiteljska	DUB_Dub_Tur	OTHER	1997-08-15	2016-04-07	18.6448	18-20	DUBROVNIK	DUBROVNIK-NERETVA	3	NO	YES	ONE PARENT	178.4
Dubrovnik-Neretva	DUBROVNIK, Turistička i ugostiteljska	DUB_Dub_Tur	OTHER	1997-06-15	2016-04-07	18.8118	18-20	DUBROVNIK	DUBROVNIK-NERETVA	3	NO	YES	ONE PARENT	187.2
Dubrovnik-Neretva	DUBROVNIK, Turistička i ugostiteljska	DUB_Dub_Tur	OTHER	1997-04-21	2016-04-07	18.9624	18-20	DUBROVNIK	DUBROVNIK-NERETVA	3	YES	NO	ONE PARENT	177.4
Dubrovnik-Neretva	METKOVIĆ, Srednja škola	DUB_Met_Sred	MIXED	1997-12-13	2015-10-24	17.8617	17	METKOVIĆ	DUBROVNIK-NERETVA	2	YES	YES	BOTH PARENTS	183
Dubrovnik-Neretva	METKOVIĆ, Srednja škola	DUB_Met_Sred	MIXED	1998-03-28	2015-10-24	17.5743	17	METKOVIĆ	DUBROVNIK-NERETVA	2	NO	NO	NEITHER	180.6
Dubrovnik-Neretva	METKOVIĆ, Srednja škola	DUB_Met_Sred	MIXED	1998-03-15	2015-10-24	17.6099	17	PRUD	DUBROVNIK-NERETVA	1	NO	NO	NEITHER	181.6
Dubrovnik-Neretva	METKOVIĆ, Srednja škola	DUB_Met_Sred	MIXED	1998-02-03	2015-10-24	17.7194	17	METKOVIĆ	DUBROVNIK-NERETVA	2	NO	NO	NEITHER	177.6
Dubrovnik-Neretva	METKOVIĆ, Srednja škola	DUB_Met_Sred	MIXED	1998-01-29	2015-10-24	17.7331	17	METKOVIĆ	DUBROVNIK-NERETVA	2	NO	NO	NEITHER	184.2
Dubrovnik-Neretva	METKOVIĆ, Srednja škola	DUB_Met_Sred	MIXED	1998-01-24	2015-10-24	17.7467	17	METKOVIĆ	DUBROVNIK-NERETVA	2	NO	NO	NEITHER	180.4
Dubrovnik-Neretva	METKOVIĆ, Srednja škola	DUB_Met_Sred	MIXED	1998-01-18	2015-10-24	17.7632	17	METKOVIĆ	DUBROVNIK-NERETVA	2	NO	NO	NEITHER	196.8
Dubrovnik-Neretva	METKOVIĆ, Srednja škola	DUB_Met_Sred	MIXED	1998-01-13	2015-10-24	17.7769	17	VID	DUBROVNIK-NERETVA	1	NO	NO	NEITHER	185.5
Dubrovnik-Neretva	METKOVIĆ, Srednja škola	DUB_Met_Sred	MIXED	1998-01-11	2015-10-24	17.7823	17	METKOVIĆ	DUBROVNIK-NERETVA	2	NO	NO	NEITHER	178.5
Dubrovnik-Neretva	METKOVIĆ, Srednja škola	DUB_Met_Sred	MIXED	1997-11-22	2015-10-24	17.9192	17	METKOVIĆ	DUBROVNIK-NERETVA	2	NO	NO	NEITHER	188.2
Dubrovnik-Neretva	METKOVIĆ, Srednja škola	DUB_Met_Sred	MIXED	1997-11-20	2015-10-24	17.9247	17	NEUM	DUBROVNIK-NERETVA	1	NO	NO	NEITHER	172.4
Dubrovnik-Neretva	METKOVIĆ, Srednja škola	DUB_Met_Sred	MIXED	1997-10-24	2015-10-24	17.9986	18-20	NEUM	DUBROVNIK-NERETVA	1	NO	NO	NEITHER	178.2
Dubrovnik-Neretva	METKOVIĆ, Srednja škola	DUB_Met_Sred	MIXED	1997-10-21	2015-10-24	18.0068	18-20	METKOVIĆ	DUBROVNIK-NERETVA	2	NO	NO	NEITHER	183.5
Dubrovnik-Neretva	METKOVIĆ, Srednja škola	DUB_Met_Sred	MIXED	1997-10-16	2015-10-24	18.0205	18-20	METKOVIĆ	DUBROVNIK-NERETVA	2	NO	NO	NEITHER	194.3
Dubrovnik-Neretva	METKOVIĆ, Srednja škola	DUB_Met_Sred	MIXED	1997-09-30	2015-10-24	18.0643	18-20	METKOVIĆ	DUBROVNIK-NERETVA	2	NO	NO	NEITHER	186.7
Dubrovnik-Neretva	METKOVIĆ, Srednja škola	DUB_Met_Sred	MIXED	1997-09-24	2015-10-24	18.0808	18-20	BLACE	DUBROVNIK-NERETVA	1	NO	NO	NEITHER	181.6
Dubrovnik-Neretva	METKOVIĆ, Srednja škola	DUB_Met_Sred	MIXED	1997-08-31	2015-10-24	18.1465	18-20	METKOVIĆ	DUBROVNIK-NERETVA	2	NO	NO	NEITHER	178.1
Dubrovnik-Neretva	METKOVIĆ, Srednja škola	DUB_Met_Sred	MIXED	1997-08-14	2015-10-24	18.193	18-20	METKOVIĆ	DUBROVNIK-NERETVA	2	NO	NO	NEITHER	193.1
Dubrovnik-Neretva	METKOVIĆ, Srednja škola	DUB_Met_Sred	MIXED	1997-07-27	2015-10-24	18.2423	18-20	METKOVIĆ	DUBROVNIK-NERETVA	2	NO	NO	NEITHER	188.6
Dubrovnik-Neretva	METKOVIĆ, Srednja škola	DUB_Met_Sred	MIXED	1997-07-19	2015-10-24	18.2642	18-20	KOMIN	DUBROVNIK-NERETVA	1	NO	NO	NEITHER	179.2
Dubrovnik-Neretva	METKOVIĆ, Srednja škola	DUB_Met_Sred	MIXED	1997-07-04	2015-10-24	18.3053	18-20	OPUZEN	DUBROVNIK-NERETVA	1	NO	NO	NEITHER	176.3
Dubrovnik-Neretva	METKOVIĆ, Srednja škola	DUB_Met_Sred	MIXED	1997-06-20	2015-10-24	18.3436	18-20	METKOVIĆ	DUBROVNIK-NERETVA	2	NO	NO	NEITHER	188.6
Dubrovnik-Neretva	METKOVIĆ, Srednja škola	DUB_Met_Sred	MIXED	1997-06-03	2015-10-24	18.3901	18-20	METKOVIĆ	DUBROVNIK-NERETVA	2	NO	NO	NEITHER	184.2
Dubrovnik-Neretva	METKOVIĆ, Srednja škola	DUB_Met_Sred	MIXED	1997-05-15	2015-10-24	18.4422	18-20	VID	DUBROVNIK-NERETVA	1	NO	NO	NEITHER	181.5
Dubrovnik-Neretva	METKOVIĆ, Srednja škola	DUB_Met_Sred	MIXED	1997-04-20	2015-10-24	18.5106	18-20	NEUM	DUBROVNIK-NERETVA	1	NO	NO	NEITHER	191.8
Dubrovnik-Neretva	METKOVIĆ, Srednja škola	DUB_Met_Sred	MIXED	1997-12-01	2015-10-24	17.8946	17	METKOVIĆ	DUBROVNIK-NERETVA	2	NO	YES	ONE PARENT	189.9
Dubrovnik-Neretva	METKOVIĆ, Srednja škola	DUB_Met_Sred	MIXED	1997-09-17	2015-10-24	18.0999	18-20	METKOVIĆ	DUBROVNIK-NERETVA	2	YES	NO	ONE PARENT	179.4
Dubrovnik-Neretva	METKOVIĆ, Srednja škola	DUB_Met_Sred	MIXED	1997-09-08	2015-10-24	18.1246	18-20	METKOVIĆ	DUBROVNIK-NERETVA	2	YES	NO	ONE PARENT	184.8
Dubrovnik-Neretva	METKOVIĆ, Srednja škola	DUB_Met_Sred	MIXED	1997-08-12	2015-10-24	18.1985	18-20	METKOVIĆ	DUBROVNIK-NERETVA	2	NO	YES	ONE PARENT	186.2
Dubrovnik-Neretva	METKOVIĆ, Srednja škola	DUB_Met_Sred	MIXED	1997-07-21	2015-10-24	18.2587	18-20	METKOVIĆ	DUBROVNIK-NERETVA	2	YES	NO	ONE PARENT	176
Dubrovnik-Neretva	METKOVIČ, Gimnazija	DUB_Met_Gim	GIMNAZIJA	1998-01-04	2015-10-15	17.7769	17	METKOVIĆ	DUBROVNIK-NERETVA	2	YES	YES	BOTH PARENTS	193.8
Dubrovnik-Neretva	METKOVIČ, Gimnazija	DUB_Met_Gim	GIMNAZIJA	1997-11-16	2015-10-15	17.911	17	METKOVIĆ	DUBROVNIK-NERETVA	2	YES	YES	BOTH PARENTS	175.7
Dubrovnik-Neretva	METKOVIČ, Gimnazija	DUB_Met_Gim	GIMNAZIJA	1997-09-06	2015-10-15	18.1054	18-20	METKOVIĆ	DUBROVNIK-NERETVA	2	YES	YES	BOTH PARENTS	196.1
Dubrovnik-Neretva	METKOVIČ, Gimnazija	DUB_Met_Gim	GIMNAZIJA	1997-07-26	2015-10-15	18.2204	18-20	METKOVIĆ	DUBROVNIK-NERETVA	2	YES	YES	BOTH PARENTS	188.9
Dubrovnik-Neretva	METKOVIČ, Gimnazija	DUB_Met_Gim	GIMNAZIJA	1998-04-01	2015-10-15	17.5387	17	MLINIŠTE	DUBROVNIK-NERETVA	1	NO	NO	NEITHER	189.3
Dubrovnik-Neretva	METKOVIČ, Gimnazija	DUB_Met_Gim	GIMNAZIJA	1998-02-03	2015-10-15	17.6947	17	OPUZEN	DUBROVNIK-NERETVA	1	NO	NO	NEITHER	197.1
Dubrovnik-Neretva	METKOVIČ, Gimnazija	DUB_Met_Gim	GIMNAZIJA	1998-01-15	2015-10-15	17.7467	17	METKOVIĆ	DUBROVNIK-NERETVA	2	NO	NO	NEITHER	188.5
Dubrovnik-Neretva	METKOVIČ, Gimnazija	DUB_Met_Gim	GIMNAZIJA	1998-01-14	2015-10-15	17.7495	17	METKOVIĆ	DUBROVNIK-NERETVA	2	NO	NO	NEITHER	186.3
Dubrovnik-Neretva	METKOVIČ, Gimnazija	DUB_Met_Gim	GIMNAZIJA	1997-11-03	2015-10-15	17.9466	17	POZLA GORA	DUBROVNIK-NERETVA	1	NO	NO	NEITHER	184.5
Dubrovnik-Neretva	METKOVIČ, Gimnazija	DUB_Met_Gim	GIMNAZIJA	1997-09-27	2015-10-15	18.0479	18-20	MOMIĆI	DUBROVNIK-NERETVA	1	NO	NO	NEITHER	180.5
Dubrovnik-Neretva	METKOVIČ, Gimnazija	DUB_Met_Gim	GIMNAZIJA	1997-09-09	2015-10-15	18.0972	18-20	OPUZEN	DUBROVNIK-NERETVA	1	NO	NO	NEITHER	195.6
Dubrovnik-Neretva	METKOVIČ, Gimnazija	DUB_Met_Gim	GIMNAZIJA	1997-09-01	2015-10-15	18.1191	18-20	MLINIŠTE	DUBROVNIK-NERETVA	1	NO	NO	NEITHER	182.6
Dubrovnik-Neretva	METKOVIČ, Gimnazija	DUB_Met_Gim	GIMNAZIJA	1997-08-10	2015-10-15	18.1793	18-20	METKOVIĆ	DUBROVNIK-NERETVA	2	NO	NO	NEITHER	180
Dubrovnik-Neretva	METKOVIČ, Gimnazija	DUB_Met_Gim	GIMNAZIJA	1997-07-11	2015-10-15	18.2615	18-20	METKOVIĆ	DUBROVNIK-NERETVA	2	NO	NO	NEITHER	177.9
Dubrovnik-Neretva	METKOVIČ, Gimnazija	DUB_Met_Gim	GIMNAZIJA	1997-07-10	2015-10-15	18.2642	18-20	METKOVIĆ	DUBROVNIK-NERETVA	2	NO	NO	NEITHER	176
Dubrovnik-Neretva	METKOVIČ, Gimnazija	DUB_Met_Gim	GIMNAZIJA	1997-06-12	2015-10-15	18.3409	18-20	NEUM	DUBROVNIK-NERETVA	1	NO	NO	NEITHER	186.2
Dubrovnik-Neretva	METKOVIČ, Gimnazija	DUB_Met_Gim	GIMNAZIJA	1997-06-12	2015-10-15	18.3409	18-20	METKOVIĆ	DUBROVNIK-NERETVA	2	NO	NO	NEITHER	177.1
Dubrovnik-Neretva	METKOVIČ, Gimnazija	DUB_Met_Gim	GIMNAZIJA	1997-05-21	2015-10-15	18.4011	18-20	METKOVIĆ	DUBROVNIK-NERETVA	2	NO	NO	NEITHER	172.9
Dubrovnik-Neretva	METKOVIČ, Gimnazija	DUB_Met_Gim	GIMNAZIJA	1997-05-13	2015-10-15	18.423	18-20	METKOVIĆ	DUBROVNIK-NERETVA	2	NO	NO	NEITHER	192.7
Dubrovnik-Neretva	METKOVIČ, Gimnazija	DUB_Met_Gim	GIMNAZIJA	1997-04-28	2015-10-15	18.4641	18-20	METKOVIĆ	DUBROVNIK-NERETVA	2	NO	NO	NEITHER	185.1
Dubrovnik-Neretva	METKOVIČ, Gimnazija	DUB_Met_Gim	GIMNAZIJA	1997-04-09	2015-10-15	18.5161	18-20	METKOVIĆ	DUBROVNIK-NERETVA	2	NO	NO	NEITHER	193.6
Dubrovnik-Neretva	METKOVIČ, Gimnazija	DUB_Met_Gim	GIMNAZIJA	1997-04-04	2015-10-15	18.5298	18-20	OPUZEN	DUBROVNIK-NERETVA	1	NO	NO	NEITHER	169.9
Dubrovnik-Neretva	METKOVIČ, Gimnazija	DUB_Met_Gim	GIMNAZIJA	1998-01-26	2015-10-15	17.7166	17	METKOVIĆ	DUBROVNIK-NERETVA	2	NO	YES	ONE PARENT	192.8
Dubrovnik-Neretva	METKOVIČ, Gimnazija	DUB_Met_Gim	GIMNAZIJA	1998-01-13	2015-10-15	17.7522	17	METKOVIĆ	DUBROVNIK-NERETVA	2	NO	YES	ONE PARENT	176.6
Dubrovnik-Neretva	METKOVIČ, Gimnazija	DUB_Met_Gim	GIMNAZIJA	1997-12-15	2015-10-15	17.8316	17	METKOVIĆ	DUBROVNIK-NERETVA	2	YES	NO	ONE PARENT	190.7
Dubrovnik-Neretva	METKOVIČ, Gimnazija	DUB_Met_Gim	GIMNAZIJA	1997-07-25	2015-10-15	18.2231	18-20	KOMARNA	DUBROVNIK-NERETVA	1	YES	NO	ONE PARENT	197.7
Dubrovnik-Neretva	METKOVIČ, Gimnazija	DUB_Met_Gim	GIMNAZIJA	1997-07-09	2015-10-15	18.2669	18-20	METKOVIĆ	DUBROVNIK-NERETVA	2	NO	YES	ONE PARENT	183.9
Dubrovnik-Neretva	METKOVIČ, Gimnazija	DUB_Met_Gim	GIMNAZIJA	1997-03-24	2015-10-15	18.5599	18-20	KRVAVAC	DUBROVNIK-NERETVA	1	NO	YES	ONE PARENT	179.2
Dubrovnik-Neretva	PLOČE, Srednja škola fra A. Kačića Miošića	DUB_Plo_Sred	MIXED	1998-01-13	2015-10-24	17.7769	17	PLOČE	DUBROVNIK-NERETVA	2	YES	YES	BOTH PARENTS	175.2
Dubrovnik-Neretva	PLOČE, Srednja škola fra A. Kačića Miošića	DUB_Plo_Sred	MIXED	1997-10-27	2015-10-24	17.9904	17	STAŠEVICA	DUBROVNIK-NERETVA	1	YES	YES	BOTH PARENTS	193.3
Dubrovnik-Neretva	PLOČE, Srednja škola fra A. Kačića Miošića	DUB_Plo_Sred	MIXED	1998-01-22	2015-10-24	17.7522	17	STAŠEVICA	DUBROVNIK-NERETVA	1	NO	NO	NEITHER	176.7
Dubrovnik-Neretva	PLOČE, Srednja škola fra A. Kačića Miošića	DUB_Plo_Sred	MIXED	1997-12-06	2015-10-24	17.8809	17	PLOČE	DUBROVNIK-NERETVA	2	NO	NO	NEITHER	176.6
Dubrovnik-Neretva	PLOČE, Srednja škola fra A. Kačića Miošića	DUB_Plo_Sred	MIXED	1997-09-02	2015-10-24	18.141	18-20	ROGOTIN	DUBROVNIK-NERETVA	1	NO	NO	NEITHER	179.6
Dubrovnik-Neretva	PLOČE, Srednja škola fra A. Kačića Miošića	DUB_Plo_Sred	MIXED	1997-08-11	2015-10-24	18.2012	18-20	OPUZEN	DUBROVNIK-NERETVA	1	NO	NO	NEITHER	182.9
Dubrovnik-Neretva	PLOČE, Srednja škola fra A. Kačića Miošića	DUB_Plo_Sred	MIXED	1997-07-01	2015-10-24	18.3135	18-20	STAŠEVICA	DUBROVNIK-NERETVA	1	NO	NO	NEITHER	176.5
Dubrovnik-Neretva	PLOČE, Srednja škola fra A. Kačića Miošića	DUB_Plo_Sred	MIXED	1997-06-05	2015-10-24	18.3847	18-20	PLOČE	DUBROVNIK-NERETVA	2	NO	NO	NEITHER	188.3
Dubrovnik-Neretva	PLOČE, Srednja škola fra A. Kačića Miošića	DUB_Plo_Sred	MIXED	1997-04-10	2015-10-24	18.538	18-20	PLOČE	DUBROVNIK-NERETVA	2	NO	NO	NEITHER	196.2
Dubrovnik-Neretva	PLOČE, Srednja škola fra A. Kačića Miošića	DUB_Plo_Sred	MIXED	1998-04-14	2015-10-24	17.5277	17	OPUZEN	DUBROVNIK-NERETVA	1	YES	NO	ONE PARENT	178.4
Dubrovnik-Neretva	PLOČE, Srednja škola fra A. Kačića Miošića	DUB_Plo_Sred	MIXED	1997-10-29	2015-10-24	17.9849	17	PLOČE	DUBROVNIK-NERETVA	2	NO	YES	ONE PARENT	175.1
Istra	PULA, Ekonomska	IST_Pula_Ekon	OTHER	1999-04-10	2017-04-05	17.9877	17	PULA	ISTRA	3	YES	YES	BOTH PARENTS	173.4
Istra	PULA, Ekonomska	IST_Pula_Ekon	OTHER	1998-10-29	2017-04-05	18.4339	18-20	PULA	ISTRA	3	YES	YES	BOTH PARENTS	176.3
Istra	PULA, Ekonomska	IST_Pula_Ekon	OTHER	1998-10-19	2017-04-05	18.4613	18-20	PULA	ISTRA	3	YES	YES	BOTH PARENTS	180.5	95	194	52.6316	107.479
Istra	PULA, Ekonomska	IST_Pula_Ekon	OTHER	1998-07-02	2017-04-05	18.7598	18-20	NOVI VINODOLSKI	PRIMORJE-GORSKI KOTAR	1	YES	YES	BOTH PARENTS	191.2	99.7	194.3	52.1444	101.621
Istra	PULA, Ekonomska	IST_Pula_Ekon	OTHER	1998-05-01	2017-04-05	18.9295	18-20	PULA	ISTRA	3	YES	YES	BOTH PARENTS	194.5
Istra	PULA, Ekonomska	IST_Pula_Ekon	OTHER	1999-03-27	2017-04-05	18.026	18-20	PULA	ISTRA	3	NO	NO	NEITHER	190.4	98.2	196.1	51.5756	102.994
Istra	PULA, Ekonomska	IST_Pula_Ekon	OTHER	1999-03-12	2017-04-05	18.0671	18-20	PULA	ISTRA	3	NO	NO	NEITHER	176.5
Istra	PULA, Ekonomska	IST_Pula_Ekon	OTHER	1999-01-12	2017-04-05	18.2286	18-20	PULA	ISTRA	3	NO	NO	NEITHER	184.1
Istra	PULA, Ekonomska	IST_Pula_Ekon	OTHER	1998-11-18	2017-04-05	18.3792	18-20	PULA	ISTRA	3	NO	NO	NEITHER	182.8
Istra	PULA, Ekonomska	IST_Pula_Ekon	OTHER	1998-11-09	2017-04-05	18.4038	18-20	PULA	ISTRA	3	NO	NO	NEITHER	171.4
Istra	PULA, Ekonomska	IST_Pula_Ekon	OTHER	1998-10-18	2017-04-05	18.4641	18-20	MARČANA	ISTRA	1	NO	NO	NEITHER	180.4
Istra	PULA, Ekonomska	IST_Pula_Ekon	OTHER	1998-09-20	2017-04-05	18.5407	18-20	PULA	ISTRA	3	NO	NO	NEITHER	188.3
Istra	PULA, Ekonomska	IST_Pula_Ekon	OTHER	1998-09-14	2017-04-05	18.5572	18-20	PULA	ISTRA	3	NO	NO	NEITHER	173.6
Istra	PULA, Ekonomska	IST_Pula_Ekon	OTHER	1998-09-09	2017-04-05	18.5708	18-20	PULA	ISTRA	3	NO	NO	NEITHER	186.3
Istra	PULA, Ekonomska	IST_Pula_Ekon	OTHER	1998-08-23	2017-04-05	18.6174	18-20	PULA	ISTRA	3	NO	NO	NEITHER	182.4
Istra	PULA, Ekonomska	IST_Pula_Ekon	OTHER	1998-07-08	2017-04-05	18.7433	18-20	KLARIĆI	ISTRA	1	NO	NO	NEITHER	194.4
Istra	PULA, Ekonomska	IST_Pula_Ekon	OTHER	1998-06-07	2017-04-05	18.8282	18-20	PULA	ISTRA	3	NO	NO	NEITHER	171.9
Istra	PULA, Ekonomska	IST_Pula_Ekon	OTHER	1998-06-05	2017-04-05	18.8337	18-20	PULA	ISTRA	3	NO	NO	NEITHER	180.4	94	182.2	52.1064	100.998
Istra	PULA, Ekonomska	IST_Pula_Ekon	OTHER	1998-11-15	2017-04-05	18.3874	18-20	PULA	ISTRA	3	NO	YES	ONE PARENT	188.8
Istra	PULA, Ekonomska	IST_Pula_Ekon	OTHER	1998-08-18	2017-04-05	18.6311	18-20	PULA	ISTRA	3	NO	YES	ONE PARENT	190.1
Istra	PULA, Ekonomska	IST_Pula_Ekon	OTHER	1998-07-29	2017-04-05	18.6858	18-20	PULA	ISTRA	3	NO	YES	ONE PARENT	174.1
Istra	PULA, Ekonomska	IST_Pula_Ekon	OTHER	1998-06-02	2017-04-05	18.8419	18-20	PULA	ISTRA	3	NO	YES	ONE PARENT	178
Istra	PULA, Gimnazija	IST_Pula_Gim	GIMNAZIJA	1999-04-20	2017-04-05	17.9603	17	PULA	ISTRA	3	YES	YES	BOTH PARENTS	182.7
Istra	PULA, Gimnazija	IST_Pula_Gim	GIMNAZIJA	1999-04-02	2017-04-05	18.0096	18-20	PULA	ISTRA	3	YES	YES	BOTH PARENTS	188.1
Istra	PULA, Gimnazija	IST_Pula_Gim	GIMNAZIJA	1999-03-31	2017-04-05	18.0151	18-20	PULA	ISTRA	3	YES	YES	BOTH PARENTS	181.1
Istra	PULA, Gimnazija	IST_Pula_Gim	GIMNAZIJA	1999-03-17	2017-04-05	18.0534	18-20	PULA	ISTRA	3	YES	YES	BOTH PARENTS	174.4
Istra	PULA, Gimnazija	IST_Pula_Gim	GIMNAZIJA	1999-02-07	2017-04-05	18.1574	18-20	PULA	ISTRA	3	YES	YES	BOTH PARENTS	167.8
Istra	PULA, Gimnazija	IST_Pula_Gim	GIMNAZIJA	1999-02-05	2017-04-05	18.1629	18-20	PULA	ISTRA	3	YES	YES	BOTH PARENTS	177.7
Istra	PULA, Gimnazija	IST_Pula_Gim	GIMNAZIJA	1998-12-23	2017-04-05	18.2834	18-20	PULA	ISTRA	3	YES	YES	BOTH PARENTS	179
Istra	PULA, Gimnazija	IST_Pula_Gim	GIMNAZIJA	1998-12-20	2017-04-05	18.2916	18-20	PULA	ISTRA	3	YES	YES	BOTH PARENTS	182.9
Istra	PULA, Gimnazija	IST_Pula_Gim	GIMNAZIJA	1998-11-25	2017-04-05	18.36	18-20	PULA	ISTRA	3	YES	YES	BOTH PARENTS	183.5
Istra	PULA, Gimnazija	IST_Pula_Gim	GIMNAZIJA	1998-10-15	2017-04-05	18.4723	18-20	PULA	ISTRA	3	YES	YES	BOTH PARENTS	192.5
Istra	PULA, Gimnazija	IST_Pula_Gim	GIMNAZIJA	1998-10-04	2017-04-05	18.5024	18-20	PULA	ISTRA	3	YES	YES	BOTH PARENTS	179.3
Istra	PULA, Gimnazija	IST_Pula_Gim	GIMNAZIJA	1998-09-08	2017-04-05	18.5736	18-20	PULA	ISTRA	3	YES	YES	BOTH PARENTS	175.7
Istra	PULA, Gimnazija	IST_Pula_Gim	GIMNAZIJA	1998-08-27	2017-04-05	18.6064	18-20	PULA	ISTRA	3	YES	YES	BOTH PARENTS	179.5
Istra	PULA, Gimnazija	IST_Pula_Gim	GIMNAZIJA	1998-07-07	2017-04-05	18.7461	18-20	PULA	ISTRA	3	YES	YES	BOTH PARENTS	186.8
Istra	PULA, Gimnazija	IST_Pula_Gim	GIMNAZIJA	1998-07-02	2017-04-05	18.7598	18-20	PULA	ISTRA	3	YES	YES	BOTH PARENTS	185.4
Istra	PULA, Gimnazija	IST_Pula_Gim	GIMNAZIJA	1998-05-02	2017-04-05	18.9268	18-20	JADREŠKI	ISTRA	1	YES	YES	BOTH PARENTS	178.1
Istra	PULA, Gimnazija	IST_Pula_Gim	GIMNAZIJA	1998-04-28	2017-04-05	18.9377	18-20	PULA	ISTRA	3	YES	YES	BOTH PARENTS	194.6
Istra	PULA, Gimnazija	IST_Pula_Gim	GIMNAZIJA	1998-03-19	2017-04-05	19.0472	18-20	PULA	ISTRA	3	YES	YES	BOTH PARENTS	173.1
Istra	PULA, Gimnazija	IST_Pula_Gim	GIMNAZIJA	1999-02-23	2017-04-05	18.1136	18-20	FAŽANA	ISTRA	1	NO	NO	NEITHER	177.6
Istra	PULA, Gimnazija	IST_Pula_Gim	GIMNAZIJA	1999-02-08	2017-04-05	18.1547	18-20	PULA	ISTRA	3	NO	NO	NEITHER	178.6
Istra	PULA, Gimnazija	IST_Pula_Gim	GIMNAZIJA	1999-01-27	2017-04-05	18.1875	18-20	PULA	ISTRA	3	NO	NO	NEITHER	181.6
Istra	PULA, Gimnazija	IST_Pula_Gim	GIMNAZIJA	1999-01-07	2017-04-05	18.2423	18-20	PULA	ISTRA	3	NO	NO	NEITHER	191.2
Istra	PULA, Gimnazija	IST_Pula_Gim	GIMNAZIJA	1998-12-23	2017-04-05	18.2834	18-20	BARBAN	ISTRA	1	NO	NO	NEITHER	171.3
Istra	PULA, Gimnazija	IST_Pula_Gim	GIMNAZIJA	1998-12-22	2017-04-05	18.2861	18-20	PRODOL	ISTRA	1	NO	NO	NEITHER	173.7
Istra	PULA, Gimnazija	IST_Pula_Gim	GIMNAZIJA	1998-12-21	2017-04-05	18.2888	18-20	PULA	ISTRA	3	NO	NO	NEITHER	187.3
Istra	PULA, Gimnazija	IST_Pula_Gim	GIMNAZIJA	1998-12-02	2017-04-05	18.3409	18-20	MEDULIN	ISTRA	1	NO	NO	NEITHER	177.1
Istra	PULA, Gimnazija	IST_Pula_Gim	GIMNAZIJA	1998-11-14	2017-04-05	18.3901	18-20	VALBANDON	ISTRA	1	NO	NO	NEITHER	187.3
Istra	PULA, Gimnazija	IST_Pula_Gim	GIMNAZIJA	1998-11-09	2017-04-05	18.4038	18-20	PULA	ISTRA	3	NO	NO	NEITHER	183.1
Istra	PULA, Gimnazija	IST_Pula_Gim	GIMNAZIJA	1998-11-02	2017-04-05	18.423	18-20	VALBANDON	ISTRA	1	NO	NO	NEITHER	188.7
Istra	PULA, Gimnazija	IST_Pula_Gim	GIMNAZIJA	1998-10-02	2017-04-05	18.5079	18-20	MANJADVORCI	ISTRA	1	NO	NO	NEITHER	181.8
Istra	PULA, Gimnazija	IST_Pula_Gim	GIMNAZIJA	1998-09-18	2017-04-05	18.5462	18-20	PULA	ISTRA	3	NO	NO	NEITHER	169.2
Istra	PULA, Gimnazija	IST_Pula_Gim	GIMNAZIJA	1998-09-09	2017-04-05	18.5708	18-20	ŠIŠAN	ISTRA	1	NO	NO	NEITHER	178.3
Istra	PULA, Gimnazija	IST_Pula_Gim	GIMNAZIJA	1998-09-05	2017-04-05	18.5818	18-20	PULA	ISTRA	3	NO	NO	NEITHER	175.3
Istra	PULA, Gimnazija	IST_Pula_Gim	GIMNAZIJA	1998-08-15	2017-04-05	18.6393	18-20	PULA	ISTRA	3	NO	NO	NEITHER	178.5
Istra	PULA, Gimnazija	IST_Pula_Gim	GIMNAZIJA	1998-07-16	2017-04-05	18.7214	18-20	BANJOLE	ISTRA	1	NO	NO	NEITHER	188.1
Istra	PULA, Gimnazija	IST_Pula_Gim	GIMNAZIJA	1998-07-15	2017-04-05	18.7242	18-20	MARČANA	ISTRA	1	NO	NO	NEITHER	175.5
Istra	PULA, Gimnazija	IST_Pula_Gim	GIMNAZIJA	1998-06-11	2017-04-05	18.8172	18-20	PULA	ISTRA	3	NO	NO	NEITHER	190.7
Istra	PULA, Gimnazija	IST_Pula_Gim	GIMNAZIJA	1998-06-07	2017-04-05	18.8282	18-20	PULA	ISTRA	3	NO	NO	NEITHER	203.5
Istra	PULA, Gimnazija	IST_Pula_Gim	GIMNAZIJA	1998-06-05	2017-04-05	18.8337	18-20	PULA	ISTRA	3	NO	NO	NEITHER	187.2
Istra	PULA, Gimnazija	IST_Pula_Gim	GIMNAZIJA	1998-05-18	2017-04-05	18.883	18-20	PULA	ISTRA	3	NO	NO	NEITHER	186
Istra	PULA, Gimnazija	IST_Pula_Gim	GIMNAZIJA	1998-04-24	2017-04-05	18.9487	18-20	LIŽNJAN	ISTRA	1	NO	NO	NEITHER	174.2
Istra	PULA, Gimnazija	IST_Pula_Gim	GIMNAZIJA	1998-03-17	2017-04-05	19.0527	18-20	VODNJAN	ISTRA	1	NO	NO	NEITHER	177.1
Istra	PULA, Gimnazija	IST_Pula_Gim	GIMNAZIJA	1999-04-07	2017-04-05	17.9959	18-20	VODNJAN	ISTRA	1	YES	NO	ONE PARENT	176.7
Istra	PULA, Gimnazija	IST_Pula_Gim	GIMNAZIJA	1999-02-20	2017-04-05	18.1218	18-20	LIŽNJAN	ISTRA	1	NO	YES	ONE PARENT	181.4
Istra	PULA, Gimnazija	IST_Pula_Gim	GIMNAZIJA	1999-01-26	2017-04-05	18.1903	18-20	MARČANA	ISTRA	1	YES	NO	ONE PARENT	168.7
Istra	PULA, Gimnazija	IST_Pula_Gim	GIMNAZIJA	1999-01-23	2017-04-05	18.1985	18-20	PULA	ISTRA	3	NO	YES	ONE PARENT	174.1
Istra	PULA, Gimnazija	IST_Pula_Gim	GIMNAZIJA	1999-01-13	2017-04-05	18.2259	18-20	PULA	ISTRA	3	YES	NO	ONE PARENT	190.4
Istra	PULA, Gimnazija	IST_Pula_Gim	GIMNAZIJA	1999-01-12	2017-04-05	18.2286	18-20	PULA	ISTRA	3	NO	YES	ONE PARENT	170.9
Istra	PULA, Gimnazija	IST_Pula_Gim	GIMNAZIJA	1999-01-04	2017-04-05	18.2505	18-20	VODNJAN	ISTRA	1	NO	YES	ONE PARENT	176.9
Istra	PULA, Gimnazija	IST_Pula_Gim	GIMNAZIJA	1998-12-06	2017-04-05	18.3299	18-20	HRBOKI	ISTRA	1	NO	YES	ONE PARENT	188.2
Istra	PULA, Gimnazija	IST_Pula_Gim	GIMNAZIJA	1998-10-28	2017-04-05	18.4367	18-20	PULA	ISTRA	3	NO	YES	ONE PARENT	172
Istra	PULA, Gimnazija	IST_Pula_Gim	GIMNAZIJA	1998-09-29	2017-04-05	18.5161	18-20	PULA	ISTRA	3	YES	NO	ONE PARENT	171.1
Istra	PULA, Gimnazija	IST_Pula_Gim	GIMNAZIJA	1998-09-22	2017-04-05	18.5352	18-20	PULA	ISTRA	3	YES	NO	ONE PARENT	181
Istra	PULA, Gimnazija	IST_Pula_Gim	GIMNAZIJA	1998-09-21	2017-04-05	18.538	18-20	PULA	ISTRA	3	YES	NO	ONE PARENT	177.5
Istra	PULA, Gimnazija	IST_Pula_Gim	GIMNAZIJA	1998-09-21	2017-04-05	18.538	18-20	PULA	ISTRA	3	NO	YES	ONE PARENT	177
Istra	PULA, Gimnazija	IST_Pula_Gim	GIMNAZIJA	1998-09-13	2017-04-05	18.5599	18-20	BANJOLE	ISTRA	1	YES	NO	ONE PARENT	181
Istra	PULA, Gimnazija	IST_Pula_Gim	GIMNAZIJA	1998-09-12	2017-04-05	18.5626	18-20	PULA	ISTRA	3	NO	YES	ONE PARENT	176.1
Istra	PULA, Gimnazija	IST_Pula_Gim	GIMNAZIJA	1998-09-04	2017-04-05	18.5845	18-20	PULA	ISTRA	3	YES	NO	ONE PARENT	181.9
Istra	PULA, Gimnazija	IST_Pula_Gim	GIMNAZIJA	1998-08-29	2017-04-05	18.601	18-20	BARBAM	ISTRA	1	NO	YES	ONE PARENT	178
Istra	PULA, Gimnazija	IST_Pula_Gim	GIMNAZIJA	1998-06-30	2017-04-05	18.7652	18-20	PULA	ISTRA	3	YES	NO	ONE PARENT	186.5
Istra	PULA, Gimnazija	IST_Pula_Gim	GIMNAZIJA	1998-06-08	2017-04-05	18.8255	18-20	PULA	ISTRA	3	YES	NO	ONE PARENT	179.1
Istra	PULA, Gimnazija	IST_Pula_Gim	GIMNAZIJA	1998-06-05	2017-04-05	18.8337	18-20	PULA	ISTRA	3	NO	YES	ONE PARENT	178
Istra	PULA, Gimnazija	IST_Pula_Gim	GIMNAZIJA	1998-06-03	2017-04-05	18.8392	18-20	PULA	ISTRA	3	NO	YES	ONE PARENT	191.9
Istra	PULA, Gimnazija	IST_Pula_Gim	GIMNAZIJA	1998-06-01	2017-04-05	18.8446	18-20	BARBAN	ISTRA	1	NO	YES	ONE PARENT	172.8
Istra	PULA, Gimnazija	IST_Pula_Gim	GIMNAZIJA	1998-05-19	2017-04-05	18.8802	18-20	PULA	ISTRA	3	NO	YES	ONE PARENT	178.4
Istra	PULA, Gimnazija	IST_Pula_Gim	GIMNAZIJA	1998-04-21	2017-04-05	18.9569	18-20	VODNJAN	ISTRA	1	YES	NO	ONE PARENT	175.8
Istra	PULA, Gimnazija	IST_Pula_Gim	GIMNAZIJA	1998-04-02	2017-04-05	19.0089	18-20	PULA	ISTRA	3	NO	YES	ONE PARENT	181
Istra	PULA, Medicinska	IST_Pula_Med	OTHER	1998-05-03	2017-04-06	18.9268	18-20	PULA	ISTRA	3	YES	YES	BOTH PARENTS	182.4	94.7	175.8	51.9189	96.3816
Istra	PULA, Medicinska	IST_Pula_Med	OTHER	1999-03-22	2017-04-06	18.0424	18-20	PULA	ISTRA	3	NO	NO	NEITHER	179.3	94.5	181.9	52.705	101.45
Istra	PULA, Medicinska	IST_Pula_Med	OTHER	1998-11-05	2017-04-06	18.4175	18-20	PULA	ISTRA	3	NO	NO	NEITHER	180.4	95.4	183.3	52.8825	101.608
Istra	PULA, Medicinska	IST_Pula_Med	OTHER	1998-08-30	2017-04-06	18.601	18-20	ROVINJ	ISTRA	2	NO	NO	NEITHER	181.2	94.5	188.5	52.1523	104.029
Istra	PULA, Medicinska	IST_Pula_Med	OTHER	1998-08-30	2017-04-06	18.601	18-20	PULA	ISTRA	3	NO	NO	NEITHER	176.6	92.3	178.3	52.265	100.963
Istra	PULA, Medicinska	IST_Pula_Med	OTHER	1998-05-10	2017-04-06	18.9076	18-20	PULA	ISTRA	3	NO	NO	NEITHER	178.2	94	175	52.7497	98.2043
Istra	PULA, Medicinska	IST_Pula_Med	OTHER	1998-04-27	2017-04-06	18.9432	18-20	LOBORIKA	ISTRA	1	NO	NO	NEITHER	178.6	88.5	188.8	49.5521	105.711
Istra	PULA, Medicinska	IST_Pula_Med	OTHER	1998-04-14	2017-04-06	18.9788	18-20	PULA	ISTRA	3	NO	NO	NEITHER	187.7	97.5	188.8	51.9446	100.586
Istra	PULA, Medicinska	IST_Pula_Med	OTHER	1998-04-03	2017-04-06	19.0089	18-20	POREČ	ISTRA	2	NO	NO	NEITHER	183.7	94.6	189.8	51.497	103.321
Istra	PULA, Medicinska	IST_Pula_Med	OTHER	1997-11-12	2017-04-06	19.3977	18-20	PULA	ISTRA	3	NO	NO	NEITHER	180.4	94.2	181.5	52.2173	100.61
Istra	PULA, Medicinska	IST_Pula_Med	OTHER	1997-10-24	2017-04-06	19.4497	18-20	PULA	ISTRA	3	NO	NO	NEITHER	184.9	96.3	185.5	52.0822	100.324
Istra	PULA, Medicinska	IST_Pula_Med	OTHER	1997-10-01	2017-04-06	19.5127	18-20	PULA	ISTRA	3	NO	NO	NEITHER	175.7	93.7	172	53.3295	97.8941
Istra	PULA, Medicinska	IST_Pula_Med	OTHER	1998-10-14	2017-04-06	18.4778	18-20	PULA	ISTRA	3	NO	YES	ONE PARENT	166.4	87.6	167	52.6442	100.361
Istra	PULA, Medicinska	IST_Pula_Med	OTHER	1998-09-16	2017-04-06	18.5544	18-20	BANJOLE	ISTRA	1	YES	NO	ONE PARENT	187.6	98.6	185.8	52.5586	99.0405
Istra	PULA, Medicinska	IST_Pula_Med	OTHER	1998-07-16	2017-04-06	18.7242	18-20	PULA	ISTRA	3	YES	NO	ONE PARENT	180.2	96.5	181.8	53.5516	100.888
Istra	PULA, Medicinska	IST_Pula_Med	OTHER	1998-05-30	2017-04-06	18.8528	18-20	PULA	ISTRA	3	NO	YES	ONE PARENT	184.2	98	184.1	53.203	99.9457
Istra	PULA, Medicinska	IST_Pula_Med	OTHER	1998-02-24	2017-04-06	19.1129	18-20	PULA	ISTRA	3	NO	YES	ONE PARENT	182	96.4	188.7	52.967	103.681
Istra	PULA, Medicinska	IST_Pula_Med	OTHER	1998-01-24	2017-04-06	19.1978	18-20	MARČANA	ISTRA	1	NO	YES	ONE PARENT	180.7	94.7	181	52.4073	100.166
Istra	PULA, Primijenjih umjetnosti i dizajna	IST_Pula_Prim	OTHER	1998-11-16	2017-04-05	18.3847	18-20	VALBANDON	ISTRA	1	YES	YES	BOTH PARENTS	184.4
Istra	PULA, Primijenjih umjetnosti i dizajna	IST_Pula_Prim	OTHER	1998-01-19	2017-04-05	19.2088	18-20	PULA	ISTRA	3	YES	YES	BOTH PARENTS	184.3
Istra	PULA, Primijenjih umjetnosti i dizajna	IST_Pula_Prim	OTHER	2000-01-07	2017-04-05	17.243	17	PULA	ISTRA	3	NO	YES	ONE PARENT	175
Istra	PULA, Primijenjih umjetnosti i dizajna	IST_Pula_Prim	OTHER	1998-05-28	2017-04-05	18.8556	18-20	PULA	ISTRA	3	NO	YES	ONE PARENT	187.8
Istra	PULA, Privatna gimnazija "Juraj Dobrila"	IST_Pula_PrivGim	GIMNAZIJA	1998-11-13	2017-04-06	18.3956	18-20	PULA	ISTRA	3	NO	NO	NEITHER	194.3
Istra	PULA, Privatna gimnazija "Juraj Dobrila"	IST_Pula_PrivGim	GIMNAZIJA	1998-10-13	2017-04-06	18.4805	18-20	ROVINJ	ISTRA	2	NO	NO	NEITHER	175.1
Istra	PULA, Privatna gimnazija "Juraj Dobrila"	IST_Pula_PrivGim	GIMNAZIJA	1998-09-20	2017-04-06	18.5435	18-20	PULA	ISTRA	3	NO	YES	ONE PARENT	176.6
Istra	PULA, Strukovna	IST_Pula_Struk	OTHER	1998-07-07	2017-04-06	18.7488	18-20	RAŠA	ISTRA	1	NO	NO	NEITHER	183.5
Istra	PULA, Strukovna	IST_Pula_Struk	OTHER	1996-07-16	2017-04-06	20.7228	18-20	PULA	ISTRA	3	NO	NO	NEITHER	179.2
Istra	PULA, Talijanska srednja Dante Alighieri	IST_Pula_Tal	MIXED	1998-06-19	2017-04-04	18.7926	18-20	GALIŽANA	ISTRA	1	YES	YES	BOTH PARENTS	182
Istra	PULA, Talijanska srednja Dante Alighieri	IST_Pula_Tal	MIXED	1999-03-13	2017-04-04	18.0616	18-20	PULA	ISTRA	3	NO	NO	NEITHER	178.7
Istra	PULA, Talijanska srednja Dante Alighieri	IST_Pula_Tal	MIXED	1999-03-08	2017-04-04	18.0753	18-20	PULA	ISTRA	3	NO	NO	NEITHER	167.9
Istra	PULA, Talijanska srednja Dante Alighieri	IST_Pula_Tal	MIXED	1999-02-25	2017-04-04	18.1054	18-20	PULA	ISTRA	3	NO	NO	NEITHER	171.3
Istra	PULA, Talijanska srednja Dante Alighieri	IST_Pula_Tal	MIXED	1999-01-22	2017-04-04	18.1985	18-20	GALIŽANA	ISTRA	1	NO	NO	NEITHER	173.7
Istra	PULA, Talijanska srednja Dante Alighieri	IST_Pula_Tal	MIXED	1998-11-10	2017-04-04	18.3984	18-20	FAŽANA	ISTRA	1	NO	NO	NEITHER	183.2
Istra	PULA, Talijanska srednja Dante Alighieri	IST_Pula_Tal	MIXED	1998-08-10	2017-04-04	18.6502	18-20	PULA	ISTRA	3	NO	NO	NEITHER	186.7
Istra	PULA, Talijanska srednja Dante Alighieri	IST_Pula_Tal	MIXED	1998-08-02	2017-04-04	18.6721	18-20	VODNJAN	ISTRA	1	NO	NO	NEITHER	190.4
Istra	PULA, Talijanska srednja Dante Alighieri	IST_Pula_Tal	MIXED	1998-05-08	2017-04-04	18.9076	18-20	PULA	ISTRA	3	NO	NO	NEITHER	177.7
Istra	PULA, Talijanska srednja Dante Alighieri	IST_Pula_Tal	MIXED	1999-04-04	2017-04-04	18.0014	18-20	PULA	ISTRA	3	NO	YES	ONE PARENT	189.4
Istra	PULA, Tehnička	IST_Pula_Teh	OTHER	1999-03-08	2017-04-06	18.0808	18-20	PULA	ISTRA	3	NO	NO	NEITHER	183.5	98.9	181.8	53.8965	99.0736
Istra	PULA, Tehnička	IST_Pula_Teh	OTHER	1999-01-31	2017-04-06	18.1793	18-20	BIBIĆI	ISTRA	1	NO	NO	NEITHER	178.1	92.4	187.4	51.881	105.222
Istra	PULA, Tehnička	IST_Pula_Teh	OTHER	1998-12-22	2017-04-06	18.2888	18-20	PULA	ISTRA	3	NO	NO	NEITHER	171.7	93.1	181.5	54.2225	105.708
Istra	PULA, Tehnička	IST_Pula_Teh	OTHER	1998-11-29	2017-04-06	18.3518	18-20	PULA	ISTRA	3	NO	NO	NEITHER	184.6	89.9	194.9	48.6999	105.58
Istra	PULA, Tehnička	IST_Pula_Teh	OTHER	1998-11-16	2017-04-06	18.3874	18-20	PULA	ISTRA	3	NO	NO	NEITHER	188.5	99.1	190.4	52.5729	101.008
Istra	PULA, Tehnička	IST_Pula_Teh	OTHER	1998-11-15	2017-04-06	18.3901	18-20	VODNJAN	ISTRA	1	NO	NO	NEITHER	190.5	100.5	188.9	52.7559	99.1601
Istra	PULA, Tehnička	IST_Pula_Teh	OTHER	1998-10-12	2017-04-06	18.4832	18-20	VODNJAN	ISTRA	1	NO	NO	NEITHER	180.2	93.4	182.1	51.8313	101.054
Istra	PULA, Tehnička	IST_Pula_Teh	OTHER	1998-10-08	2017-04-06	18.4942	18-20	PULA	ISTRA	3	NO	NO	NEITHER	189.5	97.1	196.4	51.2401	103.641
Istra	PULA, Tehnička	IST_Pula_Teh	OTHER	1998-05-20	2017-04-06	18.8802	18-20	VODNJAN	ISTRA	1	NO	NO	NEITHER	183.6	97.6	181.1	53.159	98.6383
Istra	PULA, Tehnička	IST_Pula_Teh	OTHER	1998-04-18	2017-04-06	18.9678	18-20	PULA	ISTRA	3	NO	NO	NEITHER	184	98.1	182.7	53.3152	99.2935
Istra	PULA, Tehnička	IST_Pula_Teh	OTHER	1999-02-21	2017-04-06	18.1218	18-20	VALTURA	ISTRA	1	YES	NO	ONE PARENT	181.4	95.4	184.8	52.591	101.874
Istra	PULA, Tehnička	IST_Pula_Teh	OTHER	1998-10-28	2017-04-06	18.4394	18-20	PULA	ISTRA	3	NO	YES	ONE PARENT	179	93.9	180	52.4581	100.559
Istra	PULA, Tehnička	IST_Pula_Teh	OTHER	1998-09-27	2017-04-06	18.5243	18-20	HRBOKI	ISTRA	1	YES	NO	ONE PARENT	184.2	94.1	190.9	51.0858	103.637
Karlovac	KARLOVAC, Ekonomsko-turistička	KAR_Kar_Ekon	OTHER	1999-02-18	2017-04-07	18.1328	18-20	KARLOVAC	KARLOVAC	3	YES	YES	BOTH PARENTS	179	97	180.1	54.1899	100.615
Karlovac	KARLOVAC, Ekonomsko-turistička	KAR_Kar_Ekon	OTHER	1998-11-25	2017-04-07	18.3655	18-20	KARLOVAC	KARLOVAC	3	YES	YES	BOTH PARENTS	182.9	95	190.2	51.941	103.991
Karlovac	KARLOVAC, Ekonomsko-turistička	KAR_Kar_Ekon	OTHER	1998-06-26	2017-04-07	18.7817	18-20	KARLOVAC	KARLOVAC	3	YES	YES	BOTH PARENTS	184.5	95.3	183.5	51.6531	99.458
Karlovac	KARLOVAC, Ekonomsko-turistička	KAR_Kar_Ekon	OTHER	1998-05-01	2017-04-07	18.935	18-20	KARLOVAC	KARLOVAC	3	YES	YES	BOTH PARENTS	172.4	93.3	172.3	54.1183	99.942
Karlovac	KARLOVAC, Ekonomsko-turistička	KAR_Kar_Ekon	OTHER	1998-04-17	2017-04-07	18.9733	18-20	KARLOVAC	KARLOVAC	3	YES	YES	BOTH PARENTS	176.3	92.1	178.7	52.2405	101.361
Karlovac	KARLOVAC, Ekonomsko-turistička	KAR_Kar_Ekon	OTHER	1999-01-17	2017-04-07	18.2204	18-20	KARLOVAC	KARLOVAC	3	NO	NO	NEITHER	191.4	96.5	191.1	50.418	99.8433
Karlovac	KARLOVAC, Ekonomsko-turistička	KAR_Kar_Ekon	OTHER	1998-11-30	2017-04-07	18.3518	18-20	KARLOVAC	KARLOVAC	3	NO	NO	NEITHER	182.4	97.9	181.3	53.6732	99.3969
Karlovac	KARLOVAC, Ekonomsko-turistička	KAR_Kar_Ekon	OTHER	1998-11-25	2017-04-07	18.3655	18-20	KARLOVAC	KARLOVAC	3	NO	NO	NEITHER	172.3	92	174.9	53.3952	101.509
Karlovac	KARLOVAC, Ekonomsko-turistička	KAR_Kar_Ekon	OTHER	1998-11-10	2017-04-07	18.4066	18-20	KARLOVAC	KARLOVAC	3	NO	NO	NEITHER	177.5	92	183.6	51.831	103.437
Karlovac	KARLOVAC, Ekonomsko-turistička	KAR_Kar_Ekon	OTHER	1998-10-20	2017-04-07	18.4641	18-20	KARLOVAC	KARLOVAC	3	NO	NO	NEITHER	182.8	94.2	180.9	51.5317	98.9606
Karlovac	KARLOVAC, Ekonomsko-turistička	KAR_Kar_Ekon	OTHER	1998-10-08	2017-04-07	18.4969	18-20	KARLOVAC	KARLOVAC	3	NO	NO	NEITHER	183	95.3	190.2	52.0765	103.934
Karlovac	KARLOVAC, Ekonomsko-turistička	KAR_Kar_Ekon	OTHER	1998-07-07	2017-04-07	18.7515	18-20	KARLOVAC	KARLOVAC	3	NO	NO	NEITHER	187.8	95.5	190.4	50.852	101.384
Karlovac	KARLOVAC, Ekonomsko-turistička	KAR_Kar_Ekon	OTHER	1998-06-25	2017-04-07	18.7844	18-20	KARLOVAC	KARLOVAC	3	NO	NO	NEITHER	183.1	96.2	188.9	52.5396	103.168
Karlovac	KARLOVAC, Ekonomsko-turistička	KAR_Kar_Ekon	OTHER	1998-06-16	2017-04-07	18.809	18-20	KARLOVAC	KARLOVAC	3	NO	NO	NEITHER	184.5	96.5	190.4	52.3035	103.198
Karlovac	KARLOVAC, Ekonomsko-turistička	KAR_Kar_Ekon	OTHER	1998-05-18	2017-04-07	18.8884	18-20	KARLOVAC	KARLOVAC	3	NO	NO	NEITHER	187.8	94.6	192.7	50.3727	102.609
Karlovac	KARLOVAC, Ekonomsko-turistička	KAR_Kar_Ekon	OTHER	1998-05-07	2017-04-07	18.9185	18-20	KARLOVAC	KARLOVAC	3	NO	NO	NEITHER	179	93.3	175.2	52.1229	97.8771
Karlovac	KARLOVAC, Ekonomsko-turistička	KAR_Kar_Ekon	OTHER	1998-04-30	2017-04-07	18.9377	18-20	DUGA RESA	KARLOVAC	2	NO	NO	NEITHER	187.5	94.6	197.5	50.4533	105.333
Karlovac	KARLOVAC, Ekonomsko-turistička	KAR_Kar_Ekon	OTHER	1999-03-23	2017-04-07	18.0424	18-20	KARLOVAC	KARLOVAC	3	YES	NO	ONE PARENT	174.4	91.4	175.3	52.4083	100.516
Karlovac	KARLOVAC, Ekonomsko-turistička	KAR_Kar_Ekon	OTHER	1998-10-03	2017-04-07	18.5106	18-20	KARLOVAC	KARLOVAC	3	NO	YES	ONE PARENT	162.6	87.2	155.1	53.6285	95.3875
Karlovac	KARLOVAC, Ekonomsko-turistička	KAR_Kar_Ekon	OTHER	1998-09-23	2017-04-07	18.538	18-20	OZALJ	KARLOVAC	1	YES	NO	ONE PARENT	180.9	90	188.6	49.7512	104.256
Karlovac	KARLOVAC, Ekonomsko-turistička	KAR_Kar_Ekon	OTHER	1998-08-18	2017-04-07	18.6366	18-20	KARLOVAC	KARLOVAC	3	YES	NO	ONE PARENT	193.2	98.4	191.7	50.9317	99.2236
Karlovac	KARLOVAC, Ekonomsko-turistička	KAR_Kar_Ekon	OTHER	1998-08-10	2017-04-07	18.6585	18-20	KARLOVAC	KARLOVAC	3	YES	NO	ONE PARENT	181.5	92	176.9	50.6887	97.4656
Karlovac	KARLOVAC, Ekonomsko-turistička	KAR_Kar_Ekon	OTHER	1998-02-18	2017-04-07	19.1321	18-20	KARLOVAC	KARLOVAC	3	NO	YES	ONE PARENT	191.8	97	198.6	50.5735	103.545
Karlovac	KARLOVAC, Gimnazija	KAR_Kar_Gim	GIMNAZIJA	1999-01-18	2017-04-03	18.2067	18-20	KARLOVAC	KARLOVAC	3	YES	YES	BOTH PARENTS	188.4
Karlovac	KARLOVAC, Gimnazija	KAR_Kar_Gim	GIMNAZIJA	1998-12-13	2017-04-03	18.3053	18-20	KARLOVAC	KARLOVAC	3	YES	YES	BOTH PARENTS	180.9
Karlovac	KARLOVAC, Gimnazija	KAR_Kar_Gim	GIMNAZIJA	1998-11-06	2017-04-03	18.4066	18-20	KARLOVAC	KARLOVAC	3	YES	YES	BOTH PARENTS	189
Karlovac	KARLOVAC, Gimnazija	KAR_Kar_Gim	GIMNAZIJA	1998-11-02	2017-04-03	18.4175	18-20	KARLOVAC	KARLOVAC	3	YES	YES	BOTH PARENTS	184
Karlovac	KARLOVAC, Gimnazija	KAR_Kar_Gim	GIMNAZIJA	1998-10-10	2017-04-03	18.4805	18-20	KARLOVAC	KARLOVAC	3	YES	YES	BOTH PARENTS	173.2
Karlovac	KARLOVAC, Gimnazija	KAR_Kar_Gim	GIMNAZIJA	1998-10-09	2017-04-03	18.4832	18-20	KARLOVAC	KARLOVAC	3	YES	YES	BOTH PARENTS	183.3
Karlovac	KARLOVAC, Gimnazija	KAR_Kar_Gim	GIMNAZIJA	1998-09-07	2017-04-03	18.5708	18-20	KARLOVAC	KARLOVAC	3	YES	YES	BOTH PARENTS	181.4
Karlovac	KARLOVAC, Gimnazija	KAR_Kar_Gim	GIMNAZIJA	1998-08-20	2017-04-03	18.6201	18-20	KARLOVAC	KARLOVAC	3	YES	YES	BOTH PARENTS	180.1
Karlovac	KARLOVAC, Gimnazija	KAR_Kar_Gim	GIMNAZIJA	1998-07-20	2017-04-03	18.705	18-20	KORITINJA	KARLOVAC	1	YES	YES	BOTH PARENTS	185.4
Karlovac	KARLOVAC, Gimnazija	KAR_Kar_Gim	GIMNAZIJA	1998-06-17	2017-04-03	18.7953	18-20	KARLOVAC	KARLOVAC	3	YES	YES	BOTH PARENTS	175.5
Karlovac	KARLOVAC, Gimnazija	KAR_Kar_Gim	GIMNAZIJA	1998-03-31	2017-04-03	19.0089	18-20	DUGA RESA	KARLOVAC	2	YES	YES	BOTH PARENTS	185.4
Karlovac	KARLOVAC, Gimnazija	KAR_Kar_Gim	GIMNAZIJA	1999-02-22	2017-04-03	18.1109	18-20	KARLOVAC	KARLOVAC	3	NO	NO	NEITHER	175.8
Karlovac	KARLOVAC, Gimnazija	KAR_Kar_Gim	GIMNAZIJA	1999-02-19	2017-04-03	18.1191	18-20	KARLOVAC	KARLOVAC	3	NO	NO	NEITHER	181.5
Karlovac	KARLOVAC, Gimnazija	KAR_Kar_Gim	GIMNAZIJA	1999-02-09	2017-04-03	18.1465	18-20	PODVOŽIĆ	KARLOVAC	1	NO	NO	NEITHER	172.4
Karlovac	KARLOVAC, Gimnazija	KAR_Kar_Gim	GIMNAZIJA	1999-01-22	2017-04-03	18.1958	18-20	DUGA RESA	KARLOVAC	2	NO	NO	NEITHER	177.4
Karlovac	KARLOVAC, Gimnazija	KAR_Kar_Gim	GIMNAZIJA	1999-01-09	2017-04-03	18.2313	18-20	DUGA RESA	KARLOVAC	2	NO	NO	NEITHER	194.2
Karlovac	KARLOVAC, Gimnazija	KAR_Kar_Gim	GIMNAZIJA	1998-12-04	2017-04-03	18.3299	18-20	KARLOVAC	KARLOVAC	3	NO	NO	NEITHER	184
Karlovac	KARLOVAC, Gimnazija	KAR_Kar_Gim	GIMNAZIJA	1998-08-17	2017-04-03	18.6283	18-20	KARLOVAC	KARLOVAC	3	NO	NO	NEITHER	178.5
Karlovac	KARLOVAC, Gimnazija	KAR_Kar_Gim	GIMNAZIJA	1998-07-22	2017-04-03	18.6995	18-20	KARLOVAC	KARLOVAC	3	NO	NO	NEITHER	189.7
Karlovac	KARLOVAC, Gimnazija	KAR_Kar_Gim	GIMNAZIJA	1998-07-16	2017-04-03	18.7159	18-20	KARLOVAC	KARLOVAC	3	NO	NO	NEITHER	179.7
Karlovac	KARLOVAC, Gimnazija	KAR_Kar_Gim	GIMNAZIJA	1998-05-24	2017-04-03	18.8611	18-20	KARLOVAC	KARLOVAC	3	NO	NO	NEITHER	188.1
Karlovac	KARLOVAC, Gimnazija	KAR_Kar_Gim	GIMNAZIJA	1998-04-29	2017-04-03	18.9295	18-20	KARLOVAC	KARLOVAC	3	NO	NO	NEITHER	184.1
Karlovac	KARLOVAC, Gimnazija	KAR_Kar_Gim	GIMNAZIJA	1998-02-23	2017-04-03	19.1075	18-20	FRANJETIĆI	KARLOVAC	1	NO	NO	NEITHER	182.6
Karlovac	KARLOVAC, Gimnazija	KAR_Kar_Gim	GIMNAZIJA	1997-09-25	2017-04-03	19.5209	18-20	KARLOVAC	KARLOVAC	3	NO	NO	NEITHER	183.4
Karlovac	KARLOVAC, Gimnazija	KAR_Kar_Gim	GIMNAZIJA	1999-04-01	2017-04-03	18.0068	18-20	KARLOVAC	KARLOVAC	3	YES	NO	ONE PARENT	163.8
Karlovac	KARLOVAC, Gimnazija	KAR_Kar_Gim	GIMNAZIJA	1999-03-26	2017-04-03	18.0233	18-20	KARLOVAC	KARLOVAC	3	NO	YES	ONE PARENT	182.2
Karlovac	KARLOVAC, Gimnazija	KAR_Kar_Gim	GIMNAZIJA	1999-03-18	2017-04-03	18.0452	18-20	NOVAKI OZALJSKI	KARLOVAC	1	YES	NO	ONE PARENT	182.6
Karlovac	KARLOVAC, Gimnazija	KAR_Kar_Gim	GIMNAZIJA	1999-03-07	2017-04-03	18.0753	18-20	DUGA RESA	KARLOVAC	2	NO	YES	ONE PARENT	188.2
Karlovac	KARLOVAC, Gimnazija	KAR_Kar_Gim	GIMNAZIJA	1999-01-03	2017-04-03	18.2478	18-20	VRBOVSKO	PRIMORJE-GORSKI KOTAR	1	YES	NO	ONE PARENT	172.2
Karlovac	KARLOVAC, Gimnazija	KAR_Kar_Gim	GIMNAZIJA	1998-09-10	2017-04-03	18.5626	18-20	OZALJ	KARLOVAC	1	YES	NO	ONE PARENT	186.6
Karlovac	KARLOVAC, Gimnazija	KAR_Kar_Gim	GIMNAZIJA	1998-09-06	2017-04-03	18.5736	18-20	KARLOVAC	KARLOVAC	3	NO	YES	ONE PARENT	178.9
Karlovac	KARLOVAC, Gimnazija	KAR_Kar_Gim	GIMNAZIJA	1998-08-11	2017-04-03	18.6448	18-20	VRBOVSKO	PRIMORJE-GORSKI KOTAR	1	YES	NO	ONE PARENT	166.6
Karlovac	KARLOVAC, Gimnazija	KAR_Kar_Gim	GIMNAZIJA	1998-08-11	2017-04-03	18.6448	18-20	VRBOVSKO	PRIMORJE-GORSKI KOTAR	1	YES	NO	ONE PARENT	171.5
Karlovac	KARLOVAC, Gimnazija	KAR_Kar_Gim	GIMNAZIJA	1998-08-10	2017-04-03	18.6475	18-20	KARLOVAC	KARLOVAC	3	YES	NO	ONE PARENT	191.5
Karlovac	KARLOVAC, Gimnazija	KAR_Kar_Gim	GIMNAZIJA	1998-08-05	2017-04-03	18.6612	18-20	KARLOVAC	KARLOVAC	3	NO	YES	ONE PARENT	178.3
Karlovac	KARLOVAC, Gimnazija	KAR_Kar_Gim	GIMNAZIJA	1998-07-19	2017-04-03	18.7077	18-20	KARLOVAC	KARLOVAC	3	NO	YES	ONE PARENT	174
Karlovac	KARLOVAC, Gimnazija	KAR_Kar_Gim	GIMNAZIJA	1998-07-13	2017-04-03	18.7242	18-20	DRAGANIĆ	KARLOVAC	1	NO	YES	ONE PARENT	189
Karlovac	KARLOVAC, Gimnazija	KAR_Kar_Gim	GIMNAZIJA	1998-05-29	2017-04-03	18.8474	18-20	KARLOVAC	KARLOVAC	3	YES	NO	ONE PARENT	182.5
Karlovac	KARLOVAC, Gimnazija	KAR_Kar_Gim	GIMNAZIJA	1998-05-15	2017-04-03	18.8857	18-20	KARLOVAC	KARLOVAC	3	NO	YES	ONE PARENT	176.3
Karlovac	KARLOVAC, Medicinska	KAR_Kar_Med	OTHER	1998-09-28	2017-04-03	18.5133	18-20	KARLOVAC	KARLOVAC	3	YES	YES	BOTH PARENTS	182
Karlovac	KARLOVAC, Medicinska	KAR_Kar_Med	OTHER	1998-10-31	2017-04-03	18.423	18-20	UDBINJA	KARLOVAC	1	NO	NO	NEITHER	185.5
Karlovac	KARLOVAC, Medicinska	KAR_Kar_Med	OTHER	1998-10-08	2017-04-03	18.486	18-20	KARLOVAC	KARLOVAC	3	NO	NO	NEITHER	179.7
Karlovac	KARLOVAC, Medicinska	KAR_Kar_Med	OTHER	1998-09-30	2017-04-03	18.5079	18-20	KARLOVAC	KARLOVAC	3	NO	NO	NEITHER	182
Karlovac	KARLOVAC, Medicinska	KAR_Kar_Med	OTHER	1998-09-02	2017-04-03	18.5845	18-20	KARLOVAC	KARLOVAC	3	NO	NO	NEITHER	178.4
Karlovac	KARLOVAC, Medicinska	KAR_Kar_Med	OTHER	1998-08-09	2017-04-03	18.6502	18-20	BRAJAKOVO BRDO	KARLOVAC	1	NO	NO	NEITHER	174
Karlovac	KARLOVAC, Medicinska	KAR_Kar_Med	OTHER	1998-07-10	2017-04-03	18.7324	18-20	KARLOVAC	KARLOVAC	3	NO	NO	NEITHER	185.3
Karlovac	KARLOVAC, Medicinska	KAR_Kar_Med	OTHER	1998-05-26	2017-04-03	18.8556	18-20	BELAJSKE POLJICE	KARLOVAC	1	NO	NO	NEITHER	174.9
Karlovac	KARLOVAC, Medicinska	KAR_Kar_Med	OTHER	1998-05-18	2017-04-03	18.8775	18-20	ZAGRAD	KARLOVAC	1	NO	NO	NEITHER	177.2
Karlovac	KARLOVAC, Medicinska	KAR_Kar_Med	OTHER	1998-05-12	2017-04-03	18.8939	18-20	KARLOVAC	KARLOVAC	3	NO	NO	NEITHER	172.2
Karlovac	KARLOVAC, Medicinska	KAR_Kar_Med	OTHER	1998-03-09	2017-04-03	19.0691	18-20	KARLOVAC	KARLOVAC	3	NO	NO	NEITHER	183.2
Karlovac	KARLOVAC, Medicinska	KAR_Kar_Med	OTHER	1998-03-01	2017-04-03	19.091	18-20	KARLOVAC	KARLOVAC	3	NO	NO	NEITHER	177.9
Karlovac	KARLOVAC, Medicinska	KAR_Kar_Med	OTHER	1997-12-08	2017-04-03	19.3183	18-20	KARLOVAC	KARLOVAC	3	NO	NO	NEITHER	173.7
Karlovac	KARLOVAC, Medicinska	KAR_Kar_Med	OTHER	1997-11-02	2017-04-03	19.4168	18-20	KARLOVAC	KARLOVAC	3	NO	NO	NEITHER	180.3
Karlovac	KARLOVAC, Medicinska	KAR_Kar_Med	OTHER	1997-09-18	2017-04-03	19.54	18-20	KARLOVAC	KARLOVAC	3	NO	NO	NEITHER	174.9
Karlovac	KARLOVAC, Medicinska	KAR_Kar_Med	OTHER	1997-08-18	2017-04-03	19.6249	18-20	KARLOVAC	KARLOVAC	3	NO	NO	NEITHER	186.3
Karlovac	KARLOVAC, Medicinska	KAR_Kar_Med	OTHER	1996-10-08	2017-04-03	20.4846	18-20	KARLOVAC	KARLOVAC	3	NO	NO	NEITHER	177.6
Karlovac	KARLOVAC, Medicinska	KAR_Kar_Med	OTHER	1999-02-02	2017-04-03	18.1656	18-20	ZDIHOVO	PRIMORJE-GORSKI KOTAR	1	YES	NO	ONE PARENT	187.6
Karlovac	KARLOVAC, Medicinska	KAR_Kar_Med	OTHER	1999-01-01	2017-04-03	18.2533	18-20	KARLOVAC	KARLOVAC	3	YES	NO	ONE PARENT	183.9
Karlovac	KARLOVAC, Medicinska	KAR_Kar_Med	OTHER	1998-06-11	2017-04-03	18.8118	18-20	KUPLJENSKO	KARLOVAC	1	YES	NO	ONE PARENT	190.6
Karlovac	KARLOVAC, Medicinska	KAR_Kar_Med	OTHER	1998-04-04	2017-04-03	18.9979	18-20	KARLOVAC	KARLOVAC	3	YES	NO	ONE PARENT	179.2
Karlovac	KARLOVAC, Medicinska	KAR_Kar_Med	OTHER	1998-03-27	2017-04-03	19.0198	18-20	KARLOVAC	KARLOVAC	3	YES	NO	ONE PARENT	176.9
Karlovac	KARLOVAC, Medicinska	KAR_Kar_Med	OTHER	1998-03-27	2017-04-03	19.0198	18-20	KARLOVAC	KARLOVAC	3	YES	NO	ONE PARENT	176.5
Karlovac	KARLOVAC, Medicinska	KAR_Kar_Med	OTHER	1998-03-21	2017-04-03	19.0363	18-20	DRAGANIĆ	KARLOVAC	1	NO	YES	ONE PARENT	188.1
Karlovac	KARLOVAC, Prirodoslovna	KAR_Kar_Prir	OTHER	1999-03-31	2017-04-07	18.0205	18-20	VELIKA PAKA	KARLOVAC	1	YES	YES	BOTH PARENTS	176.9
Karlovac	KARLOVAC, Prirodoslovna	KAR_Kar_Prir	OTHER	1999-03-14	2017-04-07	18.0671	18-20	KARLOVAC	KARLOVAC	3	NO	NO	NEITHER	190.4
Karlovac	KARLOVAC, Prirodoslovna	KAR_Kar_Prir	OTHER	1999-02-16	2017-04-07	18.1383	18-20	KARLOVAC	KARLOVAC	3	NO	NO	NEITHER	175
Karlovac	KARLOVAC, Prirodoslovna	KAR_Kar_Prir	OTHER	1999-01-16	2017-04-07	18.2231	18-20	JASTREBARSKO	KARLOVAC	1	NO	NO	NEITHER	188.8
Karlovac	KARLOVAC, Prirodoslovna	KAR_Kar_Prir	OTHER	1998-07-28	2017-04-07	18.694	18-20	DRAGANIĆ	KARLOVAC	1	NO	NO	NEITHER	180.8
Karlovac	KARLOVAC, Prirodoslovna	KAR_Kar_Prir	OTHER	1998-05-02	2017-04-07	18.9322	18-20	GVOZD	KARLOVAC	1	NO	NO	NEITHER	187.9
Karlovac	KARLOVAC, Prirodoslovna	KAR_Kar_Prir	OTHER	1998-11-19	2017-04-07	18.3819	18-20	DRAGANIĆ	KARLOVAC	1	YES	NO	ONE PARENT	195.3
Karlovac	KARLOVAC, Šumarska i drvodjeljska	KAR_Kar_Sum	OTHER	1998-12-12	2017-04-07	18.319	18-20	VRBOVSKO	PRIMORJE-GORSKI KOTAR	1	YES	YES	BOTH PARENTS	178.4	90	180.6	50.4484	101.233
Karlovac	KARLOVAC, Šumarska i drvodjeljska	KAR_Kar_Sum	OTHER	2000-01-10	2017-04-07	17.2402	17	KARLOVAC	KARLOVAC	3	NO	NO	NEITHER	186.4	96	189.7	51.5021	101.77
Karlovac	KARLOVAC, Šumarska i drvodjeljska	KAR_Kar_Sum	OTHER	1998-12-11	2017-04-07	18.3217	18-20	DUGA RESA	KARLOVAC	2	NO	NO	NEITHER	181	93.2	194.2	51.4917	107.293
Karlovac	KARLOVAC, Šumarska i drvodjeljska	KAR_Kar_Sum	OTHER	1998-11-27	2017-04-07	18.36	18-20	PRISELCI	KARLOVAC	1	NO	NO	NEITHER	181.1	88.9	178.3	49.0889	98.4539
Karlovac	KARLOVAC, Šumarska i drvodjeljska	KAR_Kar_Sum	OTHER	1998-10-14	2017-04-07	18.4805	18-20	GRDUN	KARLOVAC	1	NO	NO	NEITHER	172.7	92.2	172.5	53.3874	99.8842
Karlovac	KARLOVAC, Šumarska i drvodjeljska	KAR_Kar_Sum	OTHER	1998-09-07	2017-04-07	18.5818	18-20	KARLOVAC	KARLOVAC	3	NO	NO	NEITHER	181	94.2	184.1	52.0442	101.713
Karlovac	KARLOVAC, Šumarska i drvodjeljska	KAR_Kar_Sum	OTHER	1998-09-04	2017-04-07	18.59	18-20	GORNJE SELO	KARLOVAC	1	NO	NO	NEITHER	180.1	91	188.9	50.5275	104.886
Karlovac	KARLOVAC, Šumarska i drvodjeljska	KAR_Kar_Sum	OTHER	1998-08-17	2017-04-07	18.6393	18-20	KARLOVAC	KARLOVAC	3	NO	NO	NEITHER	162	90.5	155.7	55.8642	96.1111
Karlovac	KARLOVAC, Šumarska i drvodjeljska	KAR_Kar_Sum	OTHER	1998-08-03	2017-04-07	18.6776	18-20	ZDIHOVO	PRIMORJE-GORSKI KOTAR	1	NO	NO	NEITHER	177.9	94.4	180.6	53.0635	101.518
Karlovac	KARLOVAC, Šumarska i drvodjeljska	KAR_Kar_Sum	OTHER	1998-05-06	2017-04-07	18.9213	18-20	OKIĆ	KARLOVAC	1	NO	NO	NEITHER	177.3	96.4	195.7	54.3711	110.378
Karlovac	KARLOVAC, Šumarska i drvodjeljska	KAR_Kar_Sum	OTHER	1998-04-27	2017-04-07	18.9459	18-20	KARLOVAC	KARLOVAC	3	NO	NO	NEITHER	190.3	98	190.1	51.4976	99.8949
Karlovac	KARLOVAC, Šumarska i drvodjeljska	KAR_Kar_Sum	OTHER	1998-04-11	2017-04-07	18.9897	18-20	CEROVAC VUKMANIČKI	KARLOVAC	1	NO	NO	NEITHER	176.3	93.6	178	53.0913	100.964
Karlovac	KARLOVAC, Šumarska i drvodjeljska	KAR_Kar_Sum	OTHER	1998-03-01	2017-04-07	19.102	18-20	BANIJA	KARLOVAC	1	NO	NO	NEITHER	172.7	90.4	182.4	52.3451	105.617
Karlovac	KARLOVAC, Šumarska i drvodjeljska	KAR_Kar_Sum	OTHER	1998-01-22	2017-04-07	19.206	18-20	KARLOVAC	KARLOVAC	3	NO	NO	NEITHER	180.8	91.5	186.5	50.6084	103.153
Karlovac	KARLOVAC, Šumarska i drvodjeljska	KAR_Kar_Sum	OTHER	1997-11-23	2017-04-07	19.3703	18-20	DONJI ZVEČAJ	KARLOVAC	1	NO	NO	NEITHER	173.5	86.2	176.3	49.683	101.614
Karlovac	KARLOVAC, Šumarska i drvodjeljska	KAR_Kar_Sum	OTHER	1997-04-25	2017-04-07	19.9507	18-20	KARLOVAC	KARLOVAC	3	NO	NO	NEITHER	181.7	94	188	51.7336	103.467
Karlovac	KARLOVAC, Šumarska i drvodjeljska	KAR_Kar_Sum	OTHER	1997-03-22	2017-04-07	20.0438	18-20	KARLOVAC	KARLOVAC	3	NO	NO	NEITHER	182.6	98.3	182.7	53.8335	100.055
Karlovac	KARLOVAC, Šumarska i drvodjeljska	KAR_Kar_Sum	OTHER	1999-05-29	2017-04-07	17.859	17	MREŽNIČKI BRIG	KARLOVAC	1	YES	NO	ONE PARENT	174.5	93.1	174.3	53.3524	99.8854
Karlovac	KARLOVAC, Šumarska i drvodjeljska	KAR_Kar_Sum	OTHER	1998-05-19	2017-04-07	18.8857	18-20	DUGA RESA	KARLOVAC	2	YES	NO	ONE PARENT	179.1	93.8	182.6	52.373	101.954
Karlovac	KARLOVAC, Tehnička škola	KAR_Kar_Teh	OTHER	1998-11-24	2017-04-07	18.3682	18-20	KARLOVAC	KARLOVAC	3	YES	YES	BOTH PARENTS	185.2	95	187.5	51.2959	101.242
Karlovac	KARLOVAC, Tehnička škola	KAR_Kar_Teh	OTHER	1998-10-12	2017-04-07	18.486	18-20	DUGA RESA	KARLOVAC	2	YES	YES	BOTH PARENTS	190.5	97.7	202.2	51.2861	106.142
Karlovac	KARLOVAC, Tehnička škola	KAR_Kar_Teh	OTHER	1998-01-01	2017-04-07	19.2635	18-20	DRAGANIĆ	KARLOVAC	1	YES	YES	BOTH PARENTS	174.9	95.9	180	54.8313	102.916
Karlovac	KARLOVAC, Tehnička škola	KAR_Kar_Teh	OTHER	1999-04-19	2017-04-07	17.9685	17	GORNJI ZVEČAJ	KARLOVAC	1	NO	NO	NEITHER	173.7	92	176	52.9649	101.324
Karlovac	KARLOVAC, Tehnička škola	KAR_Kar_Teh	OTHER	1999-03-04	2017-04-07	18.0945	18-20	VOJNIĆ	KARLOVAC	1	NO	NO	NEITHER	183.2	94.3	182.8	51.4738	99.7817
Karlovac	KARLOVAC, Tehnička škola	KAR_Kar_Teh	OTHER	1999-03-01	2017-04-07	18.1027	18-20	KARLOVAC	KARLOVAC	3	NO	NO	NEITHER	189.8	98.6	196.6	51.9494	103.583
Karlovac	KARLOVAC, Tehnička škola	KAR_Kar_Teh	OTHER	1998-12-11	2017-04-07	18.3217	18-20	KARLOVAC	KARLOVAC	3	NO	NO	NEITHER	176.7	97.2	176.2	55.0085	99.717
Karlovac	KARLOVAC, Tehnička škola	KAR_Kar_Teh	OTHER	1998-11-22	2017-04-07	18.3737	18-20	KARLOVAC	KARLOVAC	3	NO	NO	NEITHER	172.5	87	178	50.4348	103.188
Karlovac	KARLOVAC, Tehnička škola	KAR_Kar_Teh	OTHER	1998-10-30	2017-04-07	18.4367	18-20	OZALJ	KARLOVAC	1	NO	NO	NEITHER	170.5	90.5	171.5	53.0792	100.587
Karlovac	KARLOVAC, Tehnička škola	KAR_Kar_Teh	OTHER	1998-10-28	2017-04-07	18.4422	18-20	CETINGRAD	KARLOVAC	1	NO	NO	NEITHER	178.7	94.6	182.4	52.9379	102.071
Karlovac	KARLOVAC, Tehnička škola	KAR_Kar_Teh	OTHER	1998-10-21	2017-04-07	18.4613	18-20	KARLOVAC	KARLOVAC	3	NO	NO	NEITHER	181.3	99.8	183.7	55.0469	101.324
Karlovac	KARLOVAC, Tehnička škola	KAR_Kar_Teh	OTHER	1998-09-25	2017-04-07	18.5325	18-20	NOVAKI	KARLOVAC	1	NO	NO	NEITHER	169	91	177.4	53.8462	104.97
Karlovac	KARLOVAC, Tehnička škola	KAR_Kar_Teh	OTHER	1998-08-04	2017-04-07	18.6749	18-20	KARLOVAC	KARLOVAC	3	NO	NO	NEITHER	185.9	95	193	51.1027	103.819
Karlovac	KARLOVAC, Tehnička škola	KAR_Kar_Teh	OTHER	1998-06-16	2017-04-07	18.809	18-20	GORŠČA	KARLOVAC	1	NO	NO	NEITHER	186.8	101.5	202.9	54.3362	108.619
Karlovac	KARLOVAC, Tehnička škola	KAR_Kar_Teh	OTHER	1998-06-04	2017-04-07	18.8419	18-20	OZALJ	KARLOVAC	1	NO	NO	NEITHER	173.4	94	164.7	54.2099	94.9827
Karlovac	KARLOVAC, Tehnička škola	KAR_Kar_Teh	OTHER	1998-05-19	2017-04-07	18.8857	18-20	KARLOVAC	KARLOVAC	3	NO	NO	NEITHER	170.8	93.7	175.9	54.8595	102.986
Karlovac	KARLOVAC, Tehnička škola	KAR_Kar_Teh	OTHER	1998-05-18	2017-04-07	18.8884	18-20	KARLOVAC	KARLOVAC	3	NO	NO	NEITHER	183	96.7	180.7	52.8415	98.7432
Karlovac	KARLOVAC, Tehnička škola	KAR_Kar_Teh	OTHER	1998-05-17	2017-04-07	18.8912	18-20	MREŽNIČKI VENAC	KARLOVAC	1	NO	NO	NEITHER	184.1	93.5	191	50.7876	103.748
Karlovac	KARLOVAC, Tehnička škola	KAR_Kar_Teh	OTHER	1998-05-14	2017-04-07	18.8994	18-20	KARLOVAC	KARLOVAC	3	NO	NO	NEITHER	178.2	93.3	175	52.3569	98.2043
Karlovac	KARLOVAC, Tehnička škola	KAR_Kar_Teh	OTHER	1998-04-24	2017-04-07	18.9541	18-20	DUGA RESA	KARLOVAC	2	NO	NO	NEITHER	179.7	92.9	173.4	51.6973	96.4942
Karlovac	KARLOVAC, Tehnička škola	KAR_Kar_Teh	OTHER	1998-03-26	2017-04-07	19.0335	18-20	KARLOVAC	KARLOVAC	3	NO	NO	NEITHER	176.4	93.6	179.6	53.0612	101.814
Karlovac	KARLOVAC, Tehnička škola	KAR_Kar_Teh	OTHER	1998-03-05	2017-04-07	19.091	18-20	TOMAŠNICA	KARLOVAC	1	NO	NO	NEITHER	168.6	90.9	174.5	53.9146	103.499
Karlovac	KARLOVAC, Tehnička škola	KAR_Kar_Teh	OTHER	1998-03-02	2017-04-07	19.0992	18-20	KARLOVAC	KARLOVAC	3	NO	NO	NEITHER	187.6	95.6	192.6	50.9595	102.665
Karlovac	KARLOVAC, Tehnička škola	KAR_Kar_Teh	OTHER	1998-01-09	2017-04-07	19.2416	18-20	DONJE POKUPJE	KARLOVAC	1	NO	NO	NEITHER	175.8	90.5	181.2	51.479	103.072
Karlovac	KARLOVAC, Tehnička škola	KAR_Kar_Teh	OTHER	1997-08-24	2017-04-07	19.6194	18-20	KARLOVAC	KARLOVAC	3	NO	NO	NEITHER	188	93.6	197.5	49.7872	105.053
Karlovac	KARLOVAC, Tehnička škola	KAR_Kar_Teh	OTHER	1997-08-14	2017-04-07	19.6468	18-20	ZAGRAJ	KARLOVAC	1	NO	NO	NEITHER	174	93.7	180.5	53.8506	103.736
Karlovac	KARLOVAC, Tehnička škola	KAR_Kar_Teh	OTHER	1997-07-15	2017-04-07	19.729	18-20	KARLOVAC	KARLOVAC	3	NO	NO	NEITHER	178.8	92.7	187.7	51.8456	104.978
Karlovac	KARLOVAC, Tehnička škola	KAR_Kar_Teh	OTHER	1997-07-15	2017-04-07	19.729	18-20	KARLOVAC	KARLOVAC	3	NO	NO	NEITHER	181.3	95.8	174.7	52.8406	96.3596
Karlovac	KARLOVAC, Tehnička škola	KAR_Kar_Teh	OTHER	1999-02-18	2017-04-07	18.1328	18-20	DUGA RESA	KARLOVAC	2	YES	NO	ONE PARENT	181.6	95.6	186.9	52.6432	102.919
Karlovac	KARLOVAC, Tehnička škola	KAR_Kar_Teh	OTHER	1999-02-12	2017-04-07	18.1492	18-20	VOJNIĆ	KARLOVAC	1	YES	NO	ONE PARENT	181.1	97	180.1	53.5616	99.4478
Karlovac	KARLOVAC, Tehnička škola	KAR_Kar_Teh	OTHER	1999-02-08	2017-04-07	18.1602	18-20	KARLOVAC	KARLOVAC	3	NO	YES	ONE PARENT	180.8	95	183.8	52.5442	101.659
Karlovac	KARLOVAC, Tehnička škola	KAR_Kar_Teh	OTHER	1998-11-11	2017-04-07	18.4038	18-20	KARLOVAC	KARLOVAC	3	NO	YES	ONE PARENT	189.5
Karlovac	KARLOVAC, Tehnička škola	KAR_Kar_Teh	OTHER	1998-10-02	2017-04-07	18.5133	18-20	KARLOVAC	KARLOVAC	3	YES	NO	ONE PARENT	182.1	97.6	184.5	53.5969	101.318
Karlovac	KARLOVAC, Tehnička škola	KAR_Kar_Teh	OTHER	1998-07-17	2017-04-07	18.7242	18-20	KARLOVAC	KARLOVAC	3	YES	NO	ONE PARENT	185.5	98.2	188.7	52.938	101.725
Karlovac	KARLOVAC, Tehnička škola	KAR_Kar_Teh	OTHER	1998-07-14	2017-04-07	18.7324	18-20	KARLOVAC	KARLOVAC	3	NO	YES	ONE PARENT	175.4	89.5	175.8	51.0262	100.228
Karlovac	KARLOVAC, Tehnička škola	KAR_Kar_Teh	OTHER	1998-07-09	2017-04-07	18.7461	18-20	TOPUSKO	KARLOVAC	1	NO	YES	ONE PARENT	180.4	94.6	187.1	52.439	103.714
Karlovac	KARLOVAC, Tehnička škola	KAR_Kar_Teh	OTHER	1998-05-28	2017-04-07	18.8611	18-20	KARLOVAC	KARLOVAC	3	NO	YES	ONE PARENT	178.6	92.1	183.5	51.5677	102.744
Karlovac	KARLOVAC, Tehnička škola	KAR_Kar_Teh	OTHER	1998-05-19	2017-04-07	18.8857	18-20	KARLOVAC	KARLOVAC	3	YES	NO	ONE PARENT	179.1	95.5	182	53.3222	101.619
Karlovac	KARLOVAC, Tehnička škola	KAR_Kar_Teh	OTHER	1998-05-13	2017-04-07	18.9021	18-20	KARLOVAC	KARLOVAC	3	YES	NO	ONE PARENT	173.7	91.4	175	52.6195	100.748
Karlovac	KARLOVAC, Tehnička škola	KAR_Kar_Teh	OTHER	1997-05-10	2017-04-07	19.9097	18-20	JAŠKOVO	KARLOVAC	1	NO	YES	ONE PARENT	179.5	93.6	181.4	52.1448	101.058
Karlovac	KARLOVAC, Tehnička škola	KAR_Kar_Teh	OTHER	1997-03-13	2017-04-07	20.0684	18-20	DONJE STATIVE	KARLOVAC	1	YES	NO	ONE PARENT	180.8	96.6	180.8	53.4292	100
Karlovac	KARLOVAC, Trgovačko-ugostiteljska	KAR_Kar_Tur	OTHER	1999-02-23	2017-04-07	18.1191	18-20	KRIŽANČIČI	KARLOVAC	1	NO	NO	NEITHER	186.7	98.2	188.2	52.5978	100.803
Karlovac	KARLOVAC, Trgovačko-ugostiteljska	KAR_Kar_Tur	OTHER	1998-09-30	2017-04-07	18.5188	18-20	KARLOVAC	KARLOVAC	3	YES	NO	ONE PARENT	176.6	93.5	180.6	52.9445	102.265
Karlovac	KARLOVAC, Trgovačko-ugostiteljska	KAR_Kar_Tur	OTHER	1997-10-11	2017-04-07	19.488	18-20	KARLOVAC	KARLOVAC	3	NO	YES	ONE PARENT	179.8	96.5	179.8	53.6707	100
Karlovac	KARLOVAC, Trgovačko-ugostiteljska	KAR_Kar_Tur	OTHER	1997-08-26	2017-04-07	19.614	18-20	GORICA	KARLOVAC	1	NO	YES	ONE PARENT	182.7	92.8	188.4	50.7937	103.12
Karlovac	OGULIN, Gimnazija Bernarda Frankopana	KAR_Ogu_Gim	GIMNAZIJA	1998-09-30	2017-04-07	18.5188	18-20	OGULIN	KARLOVAC	2	YES	YES	BOTH PARENTS	179
Karlovac	OGULIN, Gimnazija Bernarda Frankopana	KAR_Ogu_Gim	GIMNAZIJA	1999-01-20	2017-04-07	18.2122	18-20	OGULIN	KARLOVAC	2	NO	NO	NEITHER	176.3
Karlovac	OGULIN, Gimnazija Bernarda Frankopana	KAR_Ogu_Gim	GIMNAZIJA	1998-06-10	2017-04-07	18.8255	18-20	OGULIN	KARLOVAC	2	NO	NO	NEITHER	171.1
Karlovac	OGULIN, Gimnazija Bernarda Frankopana	KAR_Ogu_Gim	GIMNAZIJA	1998-04-30	2017-04-07	18.9377	18-20	OGULIN	KARLOVAC	2	NO	NO	NEITHER	174.1
Karlovac	OGULIN, Gimnazija Bernarda Frankopana	KAR_Ogu_Gim	GIMNAZIJA	1997-12-28	2017-04-07	19.2745	18-20	OŠTARIJE	KARLOVAC	1	NO	NO	NEITHER	172.5
Karlovac	OGULIN, Gimnazija Bernarda Frankopana	KAR_Ogu_Gim	GIMNAZIJA	1998-06-06	2017-04-07	18.8364	18-20	OGULIN	KARLOVAC	2	YES	NO	ONE PARENT	180.7
Karlovac	OGULIN, Obrtnička i tehnička	KAR_Ogu_Obr	OTHER	1999-01-21	2017-04-07	18.2094	18-20	OGULIN	KARLOVAC	2	YES	YES	BOTH PARENTS	172.2
Karlovac	OGULIN, Obrtnička i tehnička	KAR_Ogu_Obr	OTHER	1999-03-09	2017-04-07	18.0808	18-20	SABLJAKI MODRUŠKI	KARLOVAC	1	NO	NO	NEITHER	185.2
Karlovac	OGULIN, Obrtnička i tehnička	KAR_Ogu_Obr	OTHER	1999-02-27	2017-04-07	18.1081	18-20	VRBOVSKO	PRIMORJE-GORSKI KOTAR	1	NO	NO	NEITHER	185.8
Karlovac	OGULIN, Obrtnička i tehnička	KAR_Ogu_Obr	OTHER	1999-02-17	2017-04-07	18.1355	18-20	OGULIN	KARLOVAC	2	NO	NO	NEITHER	183.1
Karlovac	OGULIN, Obrtnička i tehnička	KAR_Ogu_Obr	OTHER	1999-01-04	2017-04-07	18.256	18-20	OGULIN	KARLOVAC	2	NO	NO	NEITHER	184.6
Karlovac	OGULIN, Obrtnička i tehnička	KAR_Ogu_Obr	OTHER	1999-01-01	2017-04-07	18.2642	18-20	OGULIN	KARLOVAC	2	NO	NO	NEITHER	174.7
Karlovac	OGULIN, Obrtnička i tehnička	KAR_Ogu_Obr	OTHER	1998-12-31	2017-04-07	18.2669	18-20	OGULIN	KARLOVAC	2	NO	NO	NEITHER	184.3
Karlovac	OGULIN, Obrtnička i tehnička	KAR_Ogu_Obr	OTHER	1998-12-23	2017-04-07	18.2888	18-20	OGULIN	KARLOVAC	2	NO	NO	NEITHER	189.8
Karlovac	OGULIN, Obrtnička i tehnička	KAR_Ogu_Obr	OTHER	1998-12-16	2017-04-07	18.308	18-20	OGULIN	KARLOVAC	2	NO	NO	NEITHER	177.1
Karlovac	OGULIN, Obrtnička i tehnička	KAR_Ogu_Obr	OTHER	1998-12-02	2017-04-07	18.3463	18-20	OGULIN	KARLOVAC	2	NO	NO	NEITHER	190
Karlovac	OGULIN, Obrtnička i tehnička	KAR_Ogu_Obr	OTHER	1998-11-25	2017-04-07	18.3655	18-20	OGULIN	KARLOVAC	2	NO	NO	NEITHER	183.4
Karlovac	OGULIN, Obrtnička i tehnička	KAR_Ogu_Obr	OTHER	1998-11-12	2017-04-07	18.4011	18-20	OGULIN	KARLOVAC	2	NO	NO	NEITHER	175.3
Karlovac	OGULIN, Obrtnička i tehnička	KAR_Ogu_Obr	OTHER	1998-10-28	2017-04-07	18.4422	18-20	OGULIN	KARLOVAC	2	NO	NO	NEITHER	178.1
Karlovac	OGULIN, Obrtnička i tehnička	KAR_Ogu_Obr	OTHER	1998-10-18	2017-04-07	18.4695	18-20	OGULIN	KARLOVAC	2	NO	NO	NEITHER	180
Karlovac	OGULIN, Obrtnička i tehnička	KAR_Ogu_Obr	OTHER	1998-10-11	2017-04-07	18.4887	18-20	PLAŠKI	KARLOVAC	1	NO	NO	NEITHER	177
Karlovac	OGULIN, Obrtnička i tehnička	KAR_Ogu_Obr	OTHER	1998-10-11	2017-04-07	18.4887	18-20	OGULIN	KARLOVAC	2	NO	NO	NEITHER	173.1
Karlovac	OGULIN, Obrtnička i tehnička	KAR_Ogu_Obr	OTHER	1998-09-20	2017-04-07	18.5462	18-20	TOUNJ	KARLOVAC	1	NO	NO	NEITHER	167.8
Karlovac	OGULIN, Obrtnička i tehnička	KAR_Ogu_Obr	OTHER	1998-09-20	2017-04-07	18.5462	18-20	DUGA RESA	KARLOVAC	2	NO	NO	NEITHER	183.6
Karlovac	OGULIN, Obrtnička i tehnička	KAR_Ogu_Obr	OTHER	1998-09-10	2017-04-07	18.5736	18-20	OŠTARIJE	KARLOVAC	1	NO	NO	NEITHER	175.5
Karlovac	OGULIN, Obrtnička i tehnička	KAR_Ogu_Obr	OTHER	1998-09-07	2017-04-07	18.5818	18-20	JOSIPDOL	KARLOVAC	1	NO	NO	NEITHER	187.6
Karlovac	OGULIN, Obrtnička i tehnička	KAR_Ogu_Obr	OTHER	1998-08-28	2017-04-07	18.6092	18-20	OGULIN	KARLOVAC	2	NO	NO	NEITHER	187.3
Karlovac	OGULIN, Obrtnička i tehnička	KAR_Ogu_Obr	OTHER	1998-07-20	2017-04-07	18.7159	18-20	OGULIN	KARLOVAC	2	NO	NO	NEITHER	175.4
Karlovac	OGULIN, Obrtnička i tehnička	KAR_Ogu_Obr	OTHER	1998-07-18	2017-04-07	18.7214	18-20	OGULIN	KARLOVAC	2	NO	NO	NEITHER	182.9
Karlovac	OGULIN, Obrtnička i tehnička	KAR_Ogu_Obr	OTHER	1998-06-19	2017-04-07	18.8008	18-20	JOSIPDOL	KARLOVAC	1	NO	NO	NEITHER	171
Karlovac	OGULIN, Obrtnička i tehnička	KAR_Ogu_Obr	OTHER	1998-06-14	2017-04-07	18.8145	18-20	JOSIPDOL	KARLOVAC	1	NO	NO	NEITHER	178.5
Karlovac	OGULIN, Obrtnička i tehnička	KAR_Ogu_Obr	OTHER	1998-06-06	2017-04-07	18.8364	18-20	KUTEREVO	LIKA-SENJ	1	NO	NO	NEITHER	174.4
Karlovac	OGULIN, Obrtnička i tehnička	KAR_Ogu_Obr	OTHER	1998-05-05	2017-04-07	18.924	18-20	OGULIN	KARLOVAC	2	NO	NO	NEITHER	185.8
Karlovac	OGULIN, Obrtnička i tehnička	KAR_Ogu_Obr	OTHER	1998-04-23	2017-04-07	18.9569	18-20	OGULIN	KARLOVAC	2	NO	NO	NEITHER	177.8
Karlovac	OGULIN, Obrtnička i tehnička	KAR_Ogu_Obr	OTHER	1998-04-07	2017-04-07	19.0007	18-20	GENERALSKI STOL	KARLOVAC	1	NO	NO	NEITHER	177
Karlovac	OGULIN, Obrtnička i tehnička	KAR_Ogu_Obr	OTHER	1998-04-04	2017-04-07	19.0089	18-20	OGULIN	KARLOVAC	2	NO	NO	NEITHER	176.5
Karlovac	OGULIN, Obrtnička i tehnička	KAR_Ogu_Obr	OTHER	1998-03-05	2017-04-07	19.091	18-20	OGULIN	KARLOVAC	2	NO	NO	NEITHER	184.4
Karlovac	OGULIN, Obrtnička i tehnička	KAR_Ogu_Obr	OTHER	1999-08-04	2017-04-07	17.6756	17	OGULIN	KARLOVAC	2	YES	NO	ONE PARENT	195.2
Karlovac	OGULIN, Obrtnička i tehnička	KAR_Ogu_Obr	OTHER	1999-05-24	2017-04-07	17.8727	17	OGULIN	KARLOVAC	2	YES	NO	ONE PARENT	186.6
Karlovac	OGULIN, Obrtnička i tehnička	KAR_Ogu_Obr	OTHER	1999-05-22	2017-04-07	17.8782	17	OGULIN	KARLOVAC	2	YES	NO	ONE PARENT	178.5
Karlovac	OGULIN, Obrtnička i tehnička	KAR_Ogu_Obr	OTHER	1999-02-23	2017-04-07	18.1191	18-20	OGULIN	KARLOVAC	2	YES	NO	ONE PARENT	177.3
Karlovac	OGULIN, Obrtnička i tehnička	KAR_Ogu_Obr	OTHER	1999-01-22	2017-04-07	18.2067	18-20	OGULIN	KARLOVAC	2	NO	YES	ONE PARENT	172.9
Karlovac	OGULIN, Obrtnička i tehnička	KAR_Ogu_Obr	OTHER	1999-01-20	2017-04-07	18.2122	18-20	OGULIN	KARLOVAC	2	YES	NO	ONE PARENT	188.3
Karlovac	OGULIN, Obrtnička i tehnička	KAR_Ogu_Obr	OTHER	1998-12-15	2017-04-07	18.3107	18-20	OGULIN	KARLOVAC	2	NO	YES	ONE PARENT	177.1
Karlovac	OGULIN, Obrtnička i tehnička	KAR_Ogu_Obr	OTHER	1998-12-11	2017-04-07	18.3217	18-20	DUJMIĆI	KARLOVAC	1	YES	NO	ONE PARENT	190.5
Karlovac	OGULIN, Obrtnička i tehnička	KAR_Ogu_Obr	OTHER	1998-11-19	2017-04-07	18.3819	18-20	DOBRENIĆI	KARLOVAC	1	YES	NO	ONE PARENT	179
Karlovac	OGULIN, Obrtnička i tehnička	KAR_Ogu_Obr	OTHER	1998-07-01	2017-04-07	18.768	18-20	OGULIN	KARLOVAC	2	YES	NO	ONE PARENT	172.4
Lika-Senj	GOSPIĆ, Strukovna	LIK_Gos_Struk	OTHER	1999-03-22	2017-04-04	18.037	18-20	GOSPIĆ	LIKA-SENJ	2	YES	YES	BOTH PARENTS	168.7
Lika-Senj	GOSPIĆ, Strukovna	LIK_Gos_Struk	OTHER	1998-12-12	2017-04-04	18.3107	18-20	GOSPIĆ	LIKA-SENJ	2	YES	YES	BOTH PARENTS	174.4
Lika-Senj	GOSPIĆ, Strukovna	LIK_Gos_Struk	OTHER	1998-09-15	2017-04-04	18.5517	18-20	BUDAK	LIKA-SENJ	1	YES	YES	BOTH PARENTS	180.6
Lika-Senj	GOSPIĆ, Strukovna	LIK_Gos_Struk	OTHER	1998-05-18	2017-04-04	18.8802	18-20	SMIJANSKO POLJE	LIKA-SENJ	1	YES	YES	BOTH PARENTS	187.8
Lika-Senj	GOSPIĆ, Strukovna	LIK_Gos_Struk	OTHER	1999-03-23	2017-04-04	18.0342	18-20	GOSPIĆ	LIKA-SENJ	2	NO	NO	NEITHER	173.2
Lika-Senj	GOSPIĆ, Strukovna	LIK_Gos_Struk	OTHER	1999-03-12	2017-04-04	18.0643	18-20	PERUŠIĆ	LIKA-SENJ	1	NO	NO	NEITHER	187.4
Lika-Senj	GOSPIĆ, Strukovna	LIK_Gos_Struk	OTHER	1999-03-01	2017-04-04	18.0945	18-20	ŠALAMUNIĆ	LIKA-SENJ	1	NO	NO	NEITHER	191.7
Lika-Senj	GOSPIĆ, Strukovna	LIK_Gos_Struk	OTHER	1999-02-28	2017-04-04	18.0972	18-20	GOSPIĆ	LIKA-SENJ	2	NO	NO	NEITHER	188
Lika-Senj	GOSPIĆ, Strukovna	LIK_Gos_Struk	OTHER	1999-02-03	2017-04-04	18.1656	18-20	LIČKO LEŠĆE	LIKA-SENJ	1	NO	NO	NEITHER	176.5
Lika-Senj	GOSPIĆ, Strukovna	LIK_Gos_Struk	OTHER	1999-01-07	2017-04-04	18.2396	18-20	GOSPIĆ	LIKA-SENJ	2	NO	NO	NEITHER	177.7
Lika-Senj	GOSPIĆ, Strukovna	LIK_Gos_Struk	OTHER	1999-01-07	2017-04-04	18.2396	18-20	GOSPIĆ	LIKA-SENJ	2	NO	NO	NEITHER	183.9
Lika-Senj	GOSPIĆ, Strukovna	LIK_Gos_Struk	OTHER	1998-12-29	2017-04-04	18.2642	18-20	GOSPIĆ	LIKA-SENJ	2	NO	NO	NEITHER	170.9
Lika-Senj	GOSPIĆ, Strukovna	LIK_Gos_Struk	OTHER	1998-12-13	2017-04-04	18.308	18-20	BRINJE	LIKA-SENJ	1	NO	NO	NEITHER	177.5
Lika-Senj	GOSPIĆ, Strukovna	LIK_Gos_Struk	OTHER	1998-11-26	2017-04-04	18.3546	18-20	DONJE PAZARIŠTE	LIKA-SENJ	1	NO	NO	NEITHER	185.7
Lika-Senj	GOSPIĆ, Strukovna	LIK_Gos_Struk	OTHER	1998-11-03	2017-04-04	18.4175	18-20	LIČKI OSIK	LIKA-SENJ	1	NO	NO	NEITHER	177.8
Lika-Senj	GOSPIĆ, Strukovna	LIK_Gos_Struk	OTHER	1998-10-07	2017-04-04	18.4914	18-20	BRUŠANE	LIKA-SENJ	1	NO	NO	NEITHER	186
Lika-Senj	GOSPIĆ, Strukovna	LIK_Gos_Struk	OTHER	1998-09-16	2017-04-04	18.5489	18-20	GOSPIĆ	LIKA-SENJ	2	NO	NO	NEITHER	190.6
Lika-Senj	GOSPIĆ, Strukovna	LIK_Gos_Struk	OTHER	1998-09-15	2017-04-04	18.5517	18-20	GOSPIĆ	LIKA-SENJ	2	NO	NO	NEITHER	170.7
Lika-Senj	GOSPIĆ, Strukovna	LIK_Gos_Struk	OTHER	1998-09-03	2017-04-04	18.5845	18-20	GOSPIĆ	LIKA-SENJ	2	NO	NO	NEITHER	168.8
Lika-Senj	GOSPIĆ, Strukovna	LIK_Gos_Struk	OTHER	1998-08-31	2017-04-04	18.5927	18-20	GOSPIĆ	LIKA-SENJ	2	NO	NO	NEITHER	176.6
Lika-Senj	GOSPIĆ, Strukovna	LIK_Gos_Struk	OTHER	1998-07-27	2017-04-04	18.6886	18-20	ČOVIĆI	LIKA-SENJ	1	NO	NO	NEITHER	177.4
Lika-Senj	GOSPIĆ, Strukovna	LIK_Gos_Struk	OTHER	1998-07-12	2017-04-04	18.7296	18-20	LIČKI OSIK	LIKA-SENJ	1	NO	NO	NEITHER	169.7
Lika-Senj	GOSPIĆ, Strukovna	LIK_Gos_Struk	OTHER	1998-07-07	2017-04-04	18.7433	18-20	GOSPIĆ	LIKA-SENJ	2	NO	NO	NEITHER	176.7
Lika-Senj	GOSPIĆ, Strukovna	LIK_Gos_Struk	OTHER	1998-07-02	2017-04-04	18.757	18-20	LIČKO LEŠĆE	LIKA-SENJ	1	NO	NO	NEITHER	170.5
Lika-Senj	GOSPIĆ, Strukovna	LIK_Gos_Struk	OTHER	1998-06-23	2017-04-04	18.7817	18-20	GOSPIĆ	LIKA-SENJ	2	NO	NO	NEITHER	185.7
Lika-Senj	GOSPIĆ, Strukovna	LIK_Gos_Struk	OTHER	1998-06-22	2017-04-04	18.7844	18-20	GOSPIĆ	LIKA-SENJ	2	NO	NO	NEITHER	192.9
Lika-Senj	GOSPIĆ, Strukovna	LIK_Gos_Struk	OTHER	1998-06-18	2017-04-04	18.7953	18-20	GOSPIĆ	LIKA-SENJ	2	NO	NO	NEITHER	165.5
Lika-Senj	GOSPIĆ, Strukovna	LIK_Gos_Struk	OTHER	1998-06-08	2017-04-04	18.8227	18-20	SV. ROK	LIKA-SENJ	1	NO	NO	NEITHER	183
Lika-Senj	GOSPIĆ, Strukovna	LIK_Gos_Struk	OTHER	1998-06-03	2017-04-04	18.8364	18-20	UDBINA	LIKA-SENJ	1	NO	NO	NEITHER	175.9
Lika-Senj	GOSPIĆ, Strukovna	LIK_Gos_Struk	OTHER	1998-05-18	2017-04-04	18.8802	18-20	PERUŠIĆ	LIKA-SENJ	1	NO	NO	NEITHER	177.2
Lika-Senj	GOSPIĆ, Strukovna	LIK_Gos_Struk	OTHER	1998-04-14	2017-04-04	18.9733	18-20	DONJI LAPAC	LIKA-SENJ	1	NO	NO	NEITHER	179.2
Lika-Senj	GOSPIĆ, Strukovna	LIK_Gos_Struk	OTHER	1998-03-29	2017-04-04	19.0171	18-20	LIČKI OSIK	LIKA-SENJ	1	NO	NO	NEITHER	174.3
Lika-Senj	GOSPIĆ, Strukovna	LIK_Gos_Struk	OTHER	1999-02-15	2017-04-04	18.1328	18-20	LIČKI OSIK	LIKA-SENJ	1	YES	NO	ONE PARENT	192.7
Lika-Senj	GOSPIĆ, Strukovna	LIK_Gos_Struk	OTHER	1999-01-08	2017-04-04	18.2368	18-20	GOSPIĆ	LIKA-SENJ	2	NO	YES	ONE PARENT	181.1
Lika-Senj	GOSPIĆ, Strukovna	LIK_Gos_Struk	OTHER	1998-11-18	2017-04-04	18.3765	18-20	BILAJ	LIKA-SENJ	1	NO	YES	ONE PARENT	186
Lika-Senj	GOSPIĆ, Strukovna	LIK_Gos_Struk	OTHER	1998-09-19	2017-04-04	18.5407	18-20	GOSPIĆ	LIKA-SENJ	2	NO	YES	ONE PARENT	185.2
Lika-Senj	GOSPIĆ, Strukovna	LIK_Gos_Struk	OTHER	1998-07-21	2017-04-04	18.705	18-20	GOSPIĆ	LIKA-SENJ	2	YES	NO	ONE PARENT	182.3
Lika-Senj	KORENICA, Srednja škola Plitvička jezera	LIK_Kor_Sred	MIXED	1999-09-21	2017-04-04	17.5359	17	KORENICA	LIKA-SENJ	1	NO	NO	NEITHER	174.5
Lika-Senj	KORENICA, Srednja škola Plitvička jezera	LIK_Kor_Sred	MIXED	1999-02-17	2017-04-04	18.1273	18-20	KORENICA	LIKA-SENJ	1	NO	NO	NEITHER	184.8
Lika-Senj	KORENICA, Srednja škola Plitvička jezera	LIK_Kor_Sred	MIXED	1999-01-22	2017-04-04	18.1985	18-20	SLUNJ	KARLOVAC	1	NO	NO	NEITHER	181.3
Lika-Senj	KORENICA, Srednja škola Plitvička jezera	LIK_Kor_Sred	MIXED	1998-12-09	2017-04-04	18.319	18-20	GRABOVAC	KARLOVAC	1	NO	NO	NEITHER	181.4
Lika-Senj	KORENICA, Srednja škola Plitvička jezera	LIK_Kor_Sred	MIXED	1998-09-09	2017-04-04	18.5681	18-20	DREŽNIK GRAD	LIKA-SENJ	1	NO	NO	NEITHER	185.6
Lika-Senj	KORENICA, Srednja škola Plitvička jezera	LIK_Kor_Sred	MIXED	1998-06-18	2017-04-04	18.7953	18-20	KORENICA	LIKA-SENJ	1	NO	NO	NEITHER	183.3
Lika-Senj	KORENICA, Srednja škola Plitvička jezera	LIK_Kor_Sred	MIXED	1998-04-30	2017-04-04	18.9295	18-20	KORENICA	LIKA-SENJ	1	NO	NO	NEITHER	190.3
Lika-Senj	KORENICA, Srednja škola Plitvička jezera	LIK_Kor_Sred	MIXED	1998-04-22	2017-04-04	18.9514	18-20	DONJI VRGORAC	LIKA-SENJ	1	NO	NO	NEITHER	180.5
Lika-Senj	KORENICA, Srednja škola Plitvička jezera	LIK_Kor_Sred	MIXED	1998-04-08	2017-04-04	18.9897	18-20	GRABOVAC	KARLOVAC	1	NO	NO	NEITHER	191
Lika-Senj	KORENICA, Srednja škola Plitvička jezera	LIK_Kor_Sred	MIXED	1998-12-02	2017-04-04	18.3381	18-20	SMOLJANAC	LIKA-SENJ	1	YES	NO	ONE PARENT	182.1
Lika-Senj	KORENICA, Srednja škola Plitvička jezera	LIK_Kor_Sred	MIXED	1998-10-22	2017-04-04	18.4504	18-20	MUKINJE	LIKA-SENJ	1	NO	YES	ONE PARENT	184.2
Lika-Senj	OTOČAC, Srednja škola	LIK_Oto_Sred	MIXED	1998-12-04	2017-04-04	18.3326	18-20	OTOČAC	LIKA-SENJ	1	YES	YES	BOTH PARENTS	175
Lika-Senj	OTOČAC, Srednja škola	LIK_Oto_Sred	MIXED	1999-04-29	2017-04-04	17.9329	17	KORENICA	LIKA-SENJ	1	NO	NO	NEITHER	184.7
Lika-Senj	OTOČAC, Srednja škola	LIK_Oto_Sred	MIXED	1999-03-30	2017-04-04	18.0151	18-20	LIPOVLJE	LIKA-SENJ	1	NO	NO	NEITHER	186.2
Lika-Senj	OTOČAC, Srednja škola	LIK_Oto_Sred	MIXED	1999-01-20	2017-04-04	18.204	18-20	GOSPIĆ	LIKA-SENJ	2	NO	NO	NEITHER	177.5
Lika-Senj	OTOČAC, Srednja škola	LIK_Oto_Sred	MIXED	1998-12-12	2017-04-04	18.3107	18-20	KUTEREVO	LIKA-SENJ	1	NO	NO	NEITHER	186.9
Lika-Senj	OTOČAC, Srednja škola	LIK_Oto_Sred	MIXED	1998-11-20	2017-04-04	18.371	18-20	PROZOR	LIKA-SENJ	1	NO	NO	NEITHER	192.3
Lika-Senj	OTOČAC, Srednja škola	LIK_Oto_Sred	MIXED	1998-11-14	2017-04-04	18.3874	18-20	ŠVICA	LIKA-SENJ	1	NO	NO	NEITHER	176.7
Lika-Senj	OTOČAC, Srednja škola	LIK_Oto_Sred	MIXED	1998-10-25	2017-04-04	18.4422	18-20	PROZOR	LIKA-SENJ	1	NO	NO	NEITHER	196.7
Lika-Senj	OTOČAC, Srednja škola	LIK_Oto_Sred	MIXED	1998-10-24	2017-04-04	18.4449	18-20	OTOČAC	LIKA-SENJ	1	NO	NO	NEITHER	178.7
Lika-Senj	OTOČAC, Srednja škola	LIK_Oto_Sred	MIXED	1998-10-22	2017-04-04	18.4504	18-20	GOSPIĆ	LIKA-SENJ	2	NO	NO	NEITHER	185.3
Lika-Senj	OTOČAC, Srednja škola	LIK_Oto_Sred	MIXED	1998-08-04	2017-04-04	18.6667	18-20	PERUŠIĆ	LIKA-SENJ	1	NO	NO	NEITHER	185.2
Lika-Senj	OTOČAC, Srednja škola	LIK_Oto_Sred	MIXED	1998-04-19	2017-04-04	18.9596	18-20	GOSPIĆ	LIKA-SENJ	2	NO	NO	NEITHER	180.3
Lika-Senj	OTOČAC, Srednja škola	LIK_Oto_Sred	MIXED	1998-04-09	2017-04-04	18.987	18-20	PROZOR	LIKA-SENJ	1	NO	NO	NEITHER	167
Lika-Senj	OTOČAC, Srednja škola	LIK_Oto_Sred	MIXED	1998-02-10	2017-04-04	19.1458	18-20	LIČKI OSIK	LIKA-SENJ	1	NO	NO	NEITHER	188.9
Lika-Senj	OTOČAC, Srednja škola	LIK_Oto_Sred	MIXED	1997-09-19	2017-04-04	19.54	18-20	VRHOVINE	LIKA-SENJ	1	NO	NO	NEITHER	166.5
Lika-Senj	OTOČAC, Srednja škola	LIK_Oto_Sred	MIXED	1999-02-07	2017-04-04	18.1547	18-20	GOSPIĆ	LIKA-SENJ	2	NO	YES	ONE PARENT	185.1
Lika-Senj	OTOČAC, Srednja škola	LIK_Oto_Sred	MIXED	1998-08-20	2017-04-04	18.6229	18-20	OTOČAC	LIKA-SENJ	1	NO	YES	ONE PARENT	187.3
Lika-Senj	OTOČAC, Srednja škola	LIK_Oto_Sred	MIXED	1998-07-08	2017-04-04	18.7406	18-20	PROZOR	LIKA-SENJ	1	NO	YES	ONE PARENT	172.5
Lika-Senj	OTOČAC, Srednja škola	LIK_Oto_Sred	MIXED	1997-08-01	2017-04-04	19.6742	18-20	DONJI LUPAC	LIKA-SENJ	1	YES	NO	ONE PARENT	172.3
Lika-Senj	SENJ, Srednja škola P. Rittera	LIK_Senj_Sred	MIXED	1998-04-03	2016-04-20	18.0479	18-20	NOVI VINODOLSKI	PRIMORJE-GORSKI KOTAR	1	NO	NO	NEITHER	188.3
Lika-Senj	SENJ, Srednja škola P. Rittera	LIK_Senj_Sred	MIXED	1997-12-12	2016-04-20	18.3546	18-20	SENJ	LIKA-SENJ	1	NO	NO	NEITHER	177
Lika-Senj	SENJ, Srednja škola P. Rittera	LIK_Senj_Sred	MIXED	1997-12-10	2016-04-20	18.36	18-20	SENJ	LIKA-SENJ	1	NO	NO	NEITHER	172.2
Lika-Senj	SENJ, Srednja škola P. Rittera	LIK_Senj_Sred	MIXED	1997-11-19	2016-04-20	18.4175	18-20	DRAMALJ	PRIMORJE-GORSKI KOTAR	1	NO	NO	NEITHER	188.9
Lika-Senj	SENJ, Srednja škola P. Rittera	LIK_Senj_Sred	MIXED	1997-11-04	2016-04-20	18.4586	18-20	NOVI VINODOLSKI	PRIMORJE-GORSKI KOTAR	1	NO	NO	NEITHER	183.5
Lika-Senj	SENJ, Srednja škola P. Rittera	LIK_Senj_Sred	MIXED	1997-10-11	2016-04-20	18.5243	18-20	SV. JURAJ	LIKA-SENJ	1	NO	NO	NEITHER	181.6
Lika-Senj	SENJ, Srednja škola P. Rittera	LIK_Senj_Sred	MIXED	1997-10-09	2016-04-20	18.5298	18-20	SV. JURAJ	LIKA-SENJ	1	NO	NO	NEITHER	181.2
Lika-Senj	SENJ, Srednja škola P. Rittera	LIK_Senj_Sred	MIXED	1997-07-28	2016-04-20	18.7296	18-20	SENJ	LIKA-SENJ	1	NO	NO	NEITHER	188
Lika-Senj	SENJ, Srednja škola P. Rittera	LIK_Senj_Sred	MIXED	1997-04-13	2016-04-20	19.0198	18-20	SENJ	LIKA-SENJ	1	NO	NO	NEITHER	179.1
Lika-Senj	SENJ, Srednja škola P. Rittera	LIK_Senj_Sred	MIXED	1997-04-11	2016-04-20	19.0253	18-20	SENJ	LIKA-SENJ	1	NO	NO	NEITHER	180.5
Lika-Senj	SENJ, Srednja škola P. Rittera	LIK_Senj_Sred	MIXED	1997-03-25	2016-04-20	19.0719	18-20	CRIKVENICA	PRIMORJE-GORSKI KOTAR	2	NO	NO	NEITHER	178.3
Lika-Senj	SENJ, Srednja škola P. Rittera	LIK_Senj_Sred	MIXED	1997-02-13	2016-04-20	19.1814	18-20	SENJ	LIKA-SENJ	1	NO	NO	NEITHER	191.4
Lika-Senj	SENJ, Srednja škola P. Rittera	LIK_Senj_Sred	MIXED	1998-02-21	2016-04-20	18.1602	18-20	SENJ	LIKA-SENJ	1	YES	NO	ONE PARENT	189.9
Lika-Senj	SENJ, Srednja škola P. Rittera	LIK_Senj_Sred	MIXED	1998-01-14	2016-04-20	18.2642	18-20	SV. JURAJ	LIKA-SENJ	1	YES	NO	ONE PARENT	183.2
Lika-Senj	SENJ, Srednja škola P. Rittera	LIK_Senj_Sred	MIXED	1997-10-14	2016-04-20	18.5161	18-20	CRIKVENICA	PRIMORJE-GORSKI KOTAR	2	YES	NO	ONE PARENT	181.8
Primorje-Gorski Kotar	BAKAR, Pomorska	PRI_Bak_Pom	OTHER	1997-09-25	2016-04-18	18.5626	18-20	CRIKVENICA	PRIMORJE-GORSKI KOTAR	2	YES	YES	BOTH PARENTS	180
Primorje-Gorski Kotar	BAKAR, Pomorska	PRI_Bak_Pom	OTHER	1997-03-28	2016-04-18	19.0582	18-20	RIJEKA	PRIMORJE-GORSKI KOTAR	3	YES	YES	BOTH PARENTS	191.5
Primorje-Gorski Kotar	BAKAR, Pomorska	PRI_Bak_Pom	OTHER	1997-01-25	2016-04-18	19.2279	18-20	CRIKVENICA	PRIMORJE-GORSKI KOTAR	2	YES	YES	BOTH PARENTS	187.5
Primorje-Gorski Kotar	BAKAR, Pomorska	PRI_Bak_Pom	OTHER	1998-05-20	2016-04-18	17.9138	17	HRELJIN	PRIMORJE-GORSKI KOTAR	1	NO	NO	NEITHER	185.9
Primorje-Gorski Kotar	BAKAR, Pomorska	PRI_Bak_Pom	OTHER	1998-03-27	2016-04-18	18.0616	18-20	GORNJE VEŽICE	PRIMORJE-GORSKI KOTAR	1	NO	NO	NEITHER	179.7
Primorje-Gorski Kotar	BAKAR, Pomorska	PRI_Bak_Pom	OTHER	1998-03-13	2016-04-18	18.0999	18-20	KRIŽIŠĆE	PRIMORJE-GORSKI KOTAR	1	NO	NO	NEITHER	180.9
Primorje-Gorski Kotar	BAKAR, Pomorska	PRI_Bak_Pom	OTHER	1998-02-11	2016-04-18	18.1821	18-20	RIJEKA	PRIMORJE-GORSKI KOTAR	3	NO	NO	NEITHER	177.2
Primorje-Gorski Kotar	BAKAR, Pomorska	PRI_Bak_Pom	OTHER	1998-01-29	2016-04-18	18.2177	18-20	RIJEKA	PRIMORJE-GORSKI KOTAR	3	NO	NO	NEITHER	177.3
Primorje-Gorski Kotar	BAKAR, Pomorska	PRI_Bak_Pom	OTHER	1998-01-29	2016-04-18	18.2177	18-20	RIJEKA	PRIMORJE-GORSKI KOTAR	3	NO	NO	NEITHER	175.4
Primorje-Gorski Kotar	BAKAR, Pomorska	PRI_Bak_Pom	OTHER	1997-12-20	2016-04-18	18.3272	18-20	KRIŽIŠĆE	PRIMORJE-GORSKI KOTAR	1	NO	NO	NEITHER	181.9
Primorje-Gorski Kotar	BAKAR, Pomorska	PRI_Bak_Pom	OTHER	1997-12-11	2016-04-18	18.3518	18-20	DRIVENIK	PRIMORJE-GORSKI KOTAR	1	NO	NO	NEITHER	177.2
Primorje-Gorski Kotar	BAKAR, Pomorska	PRI_Bak_Pom	OTHER	1997-12-04	2016-04-18	18.371	18-20	RIJEKA	PRIMORJE-GORSKI KOTAR	3	NO	NO	NEITHER	183.5
Primorje-Gorski Kotar	BAKAR, Pomorska	PRI_Bak_Pom	OTHER	1997-12-02	2016-04-18	18.3765	18-20	KOSTRENA	PRIMORJE-GORSKI KOTAR	1	NO	NO	NEITHER	182.3
Primorje-Gorski Kotar	BAKAR, Pomorska	PRI_Bak_Pom	OTHER	1997-12-01	2016-04-18	18.3792	18-20	HRELJIN	PRIMORJE-GORSKI KOTAR	1	NO	NO	NEITHER	187.4
Primorje-Gorski Kotar	BAKAR, Pomorska	PRI_Bak_Pom	OTHER	1997-11-30	2016-04-18	18.3819	18-20	HRELJIN	PRIMORJE-GORSKI KOTAR	1	NO	NO	NEITHER	178.3
Primorje-Gorski Kotar	BAKAR, Pomorska	PRI_Bak_Pom	OTHER	1997-11-08	2016-04-18	18.4422	18-20	NOVI VINODOLSKI	PRIMORJE-GORSKI KOTAR	1	NO	NO	NEITHER	190
Primorje-Gorski Kotar	BAKAR, Pomorska	PRI_Bak_Pom	OTHER	1997-11-05	2016-04-18	18.4504	18-20	BAKAR	PRIMORJE-GORSKI KOTAR	1	NO	NO	NEITHER	183.4
Primorje-Gorski Kotar	BAKAR, Pomorska	PRI_Bak_Pom	OTHER	1997-10-21	2016-04-18	18.4914	18-20	DRAMALJ	PRIMORJE-GORSKI KOTAR	1	NO	NO	NEITHER	176.2
Primorje-Gorski Kotar	BAKAR, Pomorska	PRI_Bak_Pom	OTHER	1997-10-02	2016-04-18	18.5435	18-20	HRELJIN	PRIMORJE-GORSKI KOTAR	1	NO	NO	NEITHER	183.6
Primorje-Gorski Kotar	BAKAR, Pomorska	PRI_Bak_Pom	OTHER	1997-09-29	2016-04-18	18.5517	18-20	RIJEKA	PRIMORJE-GORSKI KOTAR	3	NO	NO	NEITHER	190.6
Primorje-Gorski Kotar	BAKAR, Pomorska	PRI_Bak_Pom	OTHER	1997-09-08	2016-04-18	18.6092	18-20	RIJEKA	PRIMORJE-GORSKI KOTAR	3	NO	NO	NEITHER	175.5
Primorje-Gorski Kotar	BAKAR, Pomorska	PRI_Bak_Pom	OTHER	1997-09-06	2016-04-18	18.6146	18-20	NOVI VINODOLSKI	PRIMORJE-GORSKI KOTAR	1	NO	NO	NEITHER	187.8
Primorje-Gorski Kotar	BAKAR, Pomorska	PRI_Bak_Pom	OTHER	1997-09-04	2016-04-18	18.6201	18-20	DRAMALJ	PRIMORJE-GORSKI KOTAR	1	NO	NO	NEITHER	174.9
Primorje-Gorski Kotar	BAKAR, Pomorska	PRI_Bak_Pom	OTHER	1997-09-02	2016-04-18	18.6256	18-20	SVETI KUZAM	PRIMORJE-GORSKI KOTAR	1	NO	NO	NEITHER	177
Primorje-Gorski Kotar	BAKAR, Pomorska	PRI_Bak_Pom	OTHER	1997-08-19	2016-04-18	18.6639	18-20	JADRANOVO	PRIMORJE-GORSKI KOTAR	1	NO	NO	NEITHER	178
Primorje-Gorski Kotar	BAKAR, Pomorska	PRI_Bak_Pom	OTHER	1997-08-17	2016-04-18	18.6694	18-20	RAB	PRIMORJE-GORSKI KOTAR	1	NO	NO	NEITHER	186.8
Primorje-Gorski Kotar	BAKAR, Pomorska	PRI_Bak_Pom	OTHER	1997-08-14	2016-04-18	18.6776	18-20	KOSTRENA	PRIMORJE-GORSKI KOTAR	1	NO	NO	NEITHER	184.5
Primorje-Gorski Kotar	BAKAR, Pomorska	PRI_Bak_Pom	OTHER	1997-07-31	2016-04-18	18.7159	18-20	BRIBIR	PRIMORJE-GORSKI KOTAR	1	NO	NO	NEITHER	163
Primorje-Gorski Kotar	BAKAR, Pomorska	PRI_Bak_Pom	OTHER	1997-07-24	2016-04-18	18.7351	18-20	MEDVEJA	PRIMORJE-GORSKI KOTAR	1	NO	NO	NEITHER	188.4
Primorje-Gorski Kotar	BAKAR, Pomorska	PRI_Bak_Pom	OTHER	1997-07-10	2016-04-18	18.7734	18-20	CRIKVENICA	PRIMORJE-GORSKI KOTAR	2	NO	NO	NEITHER	174.6
Primorje-Gorski Kotar	BAKAR, Pomorska	PRI_Bak_Pom	OTHER	1997-07-05	2016-04-18	18.7871	18-20	KUKULJANOVO	PRIMORJE-GORSKI KOTAR	1	NO	NO	NEITHER	185
Primorje-Gorski Kotar	BAKAR, Pomorska	PRI_Bak_Pom	OTHER	1997-06-29	2016-04-18	18.8036	18-20	DRAMALJ	PRIMORJE-GORSKI KOTAR	1	NO	NO	NEITHER	167.8
Primorje-Gorski Kotar	BAKAR, Pomorska	PRI_Bak_Pom	OTHER	1997-06-27	2016-04-18	18.809	18-20	TRIBALJ	PRIMORJE-GORSKI KOTAR	1	NO	NO	NEITHER	172.8
Primorje-Gorski Kotar	BAKAR, Pomorska	PRI_Bak_Pom	OTHER	1997-06-27	2016-04-18	18.809	18-20	CRIKVENICA	PRIMORJE-GORSKI KOTAR	2	NO	NO	NEITHER	177.9
Primorje-Gorski Kotar	BAKAR, Pomorska	PRI_Bak_Pom	OTHER	1997-06-09	2016-04-18	18.8583	18-20	KRASICA	PRIMORJE-GORSKI KOTAR	1	NO	NO	NEITHER	183.3
Primorje-Gorski Kotar	BAKAR, Pomorska	PRI_Bak_Pom	OTHER	1997-05-14	2016-04-18	18.9295	18-20	JADRANOVO	PRIMORJE-GORSKI KOTAR	1	NO	NO	NEITHER	190.7
Primorje-Gorski Kotar	BAKAR, Pomorska	PRI_Bak_Pom	OTHER	1997-05-14	2016-04-18	18.9295	18-20	KOSTRENA	PRIMORJE-GORSKI KOTAR	1	NO	NO	NEITHER	177.6
Primorje-Gorski Kotar	BAKAR, Pomorska	PRI_Bak_Pom	OTHER	1997-05-08	2016-04-18	18.9459	18-20	HRELJIN	PRIMORJE-GORSKI KOTAR	1	NO	NO	NEITHER	187
Primorje-Gorski Kotar	BAKAR, Pomorska	PRI_Bak_Pom	OTHER	1997-04-28	2016-04-18	18.9733	18-20	RIJEKA	PRIMORJE-GORSKI KOTAR	3	NO	NO	NEITHER	181
Primorje-Gorski Kotar	BAKAR, Pomorska	PRI_Bak_Pom	OTHER	1997-04-27	2016-04-18	18.976	18-20	RIJEKA	PRIMORJE-GORSKI KOTAR	3	NO	NO	NEITHER	170.7
Primorje-Gorski Kotar	BAKAR, Pomorska	PRI_Bak_Pom	OTHER	1997-04-18	2016-04-18	19.0007	18-20	RIJEKA	PRIMORJE-GORSKI KOTAR	3	NO	NO	NEITHER	174.9
Primorje-Gorski Kotar	BAKAR, Pomorska	PRI_Bak_Pom	OTHER	1997-04-17	2016-04-18	19.0034	18-20	NOVI VINODOLSKI	PRIMORJE-GORSKI KOTAR	1	NO	NO	NEITHER	179.5
Primorje-Gorski Kotar	BAKAR, Pomorska	PRI_Bak_Pom	OTHER	1997-04-14	2016-04-18	19.0116	18-20	MATULJI	PRIMORJE-GORSKI KOTAR	1	NO	NO	NEITHER	166.9
Primorje-Gorski Kotar	BAKAR, Pomorska	PRI_Bak_Pom	OTHER	1997-04-09	2016-04-18	19.0253	18-20	RIJEKA	PRIMORJE-GORSKI KOTAR	3	NO	NO	NEITHER	180.3
Primorje-Gorski Kotar	BAKAR, Pomorska	PRI_Bak_Pom	OTHER	1997-03-31	2016-04-18	19.05	18-20	LOVRAN	PRIMORJE-GORSKI KOTAR	1	NO	NO	NEITHER	179
Primorje-Gorski Kotar	BAKAR, Pomorska	PRI_Bak_Pom	OTHER	1997-03-17	2016-04-18	19.0883	18-20	RIJEKA	PRIMORJE-GORSKI KOTAR	3	NO	NO	NEITHER	182.9
Primorje-Gorski Kotar	BAKAR, Pomorska	PRI_Bak_Pom	OTHER	1997-02-16	2016-04-18	19.1677	18-20	RIJEKA	PRIMORJE-GORSKI KOTAR	3	NO	NO	NEITHER	187.3
Primorje-Gorski Kotar	BAKAR, Pomorska	PRI_Bak_Pom	OTHER	1997-01-30	2016-04-18	19.2142	18-20	RIJEKA	PRIMORJE-GORSKI KOTAR	3	NO	NO	NEITHER	188.1
Primorje-Gorski Kotar	BAKAR, Pomorska	PRI_Bak_Pom	OTHER	1996-04-09	2016-04-18	20.0246	18-20	PULA	ISTRA	3	NO	NO	NEITHER	182.2
Primorje-Gorski Kotar	BAKAR, Pomorska	PRI_Bak_Pom	OTHER	1997-12-26	2016-04-18	18.3107	18-20	TRIBALJ	PRIMORJE-GORSKI KOTAR	1	NO	YES	ONE PARENT	177
Primorje-Gorski Kotar	BAKAR, Pomorska	PRI_Bak_Pom	OTHER	1997-11-14	2016-04-18	18.4257	18-20	CRIKVENICA	PRIMORJE-GORSKI KOTAR	2	NO	YES	ONE PARENT	181.1
Primorje-Gorski Kotar	BAKAR, Pomorska	PRI_Bak_Pom	OTHER	1997-10-10	2016-04-18	18.5216	18-20	CRIKVENICA	PRIMORJE-GORSKI KOTAR	2	YES	NO	ONE PARENT	175.8
Primorje-Gorski Kotar	BAKAR, Pomorska	PRI_Bak_Pom	OTHER	1997-07-17	2016-04-18	18.7543	18-20	KOSTRENA	PRIMORJE-GORSKI KOTAR	1	YES	NO	ONE PARENT	188.5
Primorje-Gorski Kotar	BAKAR, Pomorska	PRI_Bak_Pom	OTHER	1997-05-16	2016-04-18	18.924	18-20	RIJEKA	PRIMORJE-GORSKI KOTAR	3	NO	YES	ONE PARENT	179
Primorje-Gorski Kotar	BAKAR, Pomorska	PRI_Bak_Pom	OTHER	1997-04-24	2016-04-18	18.9843	18-20	RIJEKA	PRIMORJE-GORSKI KOTAR	3	NO	YES	ONE PARENT	182
Primorje-Gorski Kotar	RIJEKA, Građevinska tehnička	PRI_Rij_Grad	OTHER	1997-04-24	2016-04-18	18.9843	18-20	RIJEKA	PRIMORJE-GORSKI KOTAR	3	YES	YES	BOTH PARENTS	170.7
Primorje-Gorski Kotar	RIJEKA, Građevinska tehnička	PRI_Rij_Grad	OTHER	1996-07-11	2016-04-18	19.77	18-20	LOVRAN	PRIMORJE-GORSKI KOTAR	1	YES	YES	BOTH PARENTS	187.4
Primorje-Gorski Kotar	RIJEKA, Građevinska tehnička	PRI_Rij_Grad	OTHER	1998-03-27	2016-04-18	18.0616	18-20	MARINIĆI	PRIMORJE-GORSKI KOTAR	1	NO	NO	NEITHER	178.8
Primorje-Gorski Kotar	RIJEKA, Građevinska tehnička	PRI_Rij_Grad	OTHER	1998-01-26	2016-04-18	18.2259	18-20	SENJ	LIKA-SENJ	1	NO	NO	NEITHER	187.7
Primorje-Gorski Kotar	RIJEKA, Građevinska tehnička	PRI_Rij_Grad	OTHER	1997-12-21	2016-04-18	18.3244	18-20	VIŠKOVO	PRIMORJE-GORSKI KOTAR	1	NO	NO	NEITHER	181.8
Primorje-Gorski Kotar	RIJEKA, Građevinska tehnička	PRI_Rij_Grad	OTHER	1997-11-16	2016-04-18	18.4203	18-20	VIŠKOVO	PRIMORJE-GORSKI KOTAR	1	NO	NO	NEITHER	170.7
Primorje-Gorski Kotar	RIJEKA, Građevinska tehnička	PRI_Rij_Grad	OTHER	1997-08-25	2016-04-18	18.6475	18-20	VIŠKOVO	PRIMORJE-GORSKI KOTAR	1	NO	NO	NEITHER	186.8
Primorje-Gorski Kotar	RIJEKA, Građevinska tehnička	PRI_Rij_Grad	OTHER	1997-08-05	2016-04-18	18.7023	18-20	RIJEKA	PRIMORJE-GORSKI KOTAR	3	NO	NO	NEITHER	193.1
Primorje-Gorski Kotar	RIJEKA, Građevinska tehnička	PRI_Rij_Grad	OTHER	1997-08-04	2016-04-18	18.705	18-20	KASTAV	PRIMORJE-GORSKI KOTAR	2	NO	NO	NEITHER	175.9
Primorje-Gorski Kotar	RIJEKA, Građevinska tehnička	PRI_Rij_Grad	OTHER	1997-07-14	2016-04-18	18.7625	18-20	OPATIJA	PRIMORJE-GORSKI KOTAR	2	NO	NO	NEITHER	177.8
Primorje-Gorski Kotar	RIJEKA, Građevinska tehnička	PRI_Rij_Grad	OTHER	1997-07-11	2016-04-18	18.7707	18-20	KRASICA	PRIMORJE-GORSKI KOTAR	1	NO	NO	NEITHER	166.9
Primorje-Gorski Kotar	RIJEKA, Građevinska tehnička	PRI_Rij_Grad	OTHER	1997-05-29	2016-04-18	18.8884	18-20	KRK	PRIMORJE-GORSKI KOTAR	1	NO	NO	NEITHER	177.4
Primorje-Gorski Kotar	RIJEKA, Građevinska tehnička	PRI_Rij_Grad	OTHER	1997-05-04	2016-04-18	18.9569	18-20	RIJEKA	PRIMORJE-GORSKI KOTAR	3	NO	NO	NEITHER	194.4
Primorje-Gorski Kotar	RIJEKA, Građevinska tehnička	PRI_Rij_Grad	OTHER	1997-04-16	2016-04-18	19.0062	18-20	RIJEKA	PRIMORJE-GORSKI KOTAR	3	NO	NO	NEITHER	182.7
Primorje-Gorski Kotar	RIJEKA, Građevinska tehnička	PRI_Rij_Grad	OTHER	1997-04-15	2016-04-18	19.0089	18-20	MALINSKA	PRIMORJE-GORSKI KOTAR	1	NO	NO	NEITHER	174
Primorje-Gorski Kotar	RIJEKA, Građevinska tehnička	PRI_Rij_Grad	OTHER	1997-03-03	2016-04-18	19.1266	18-20	MATULJI	PRIMORJE-GORSKI KOTAR	1	NO	NO	NEITHER	178.7
Primorje-Gorski Kotar	RIJEKA, Građevinska tehnička	PRI_Rij_Grad	OTHER	1996-05-24	2016-04-18	19.9014	18-20	RIJEKA	PRIMORJE-GORSKI KOTAR	3	NO	NO	NEITHER	190.1
Primorje-Gorski Kotar	RIJEKA, Građevinska tehnička	PRI_Rij_Grad	OTHER	1996-05-23	2016-04-18	19.9042	18-20	OMIŠALJ	PRIMORJE-GORSKI KOTAR	1	NO	NO	NEITHER	191.5
Primorje-Gorski Kotar	RIJEKA, Građevinska tehnička	PRI_Rij_Grad	OTHER	1996-05-18	2016-04-18	19.9179	18-20	RIJEKA	PRIMORJE-GORSKI KOTAR	3	NO	NO	NEITHER	191.9
Primorje-Gorski Kotar	RIJEKA, Građevinska tehnička	PRI_Rij_Grad	OTHER	1998-04-23	2016-04-18	17.9877	17	BAKAR	PRIMORJE-GORSKI KOTAR	1	YES	NO	ONE PARENT	187.3
Primorje-Gorski Kotar	RIJEKA, Građevinska tehnička	PRI_Rij_Grad	OTHER	1998-03-26	2016-04-18	18.0643	18-20	RIJEKA	PRIMORJE-GORSKI KOTAR	3	NO	YES	ONE PARENT	185.2
Primorje-Gorski Kotar	RIJEKA, Građevinska tehnička	PRI_Rij_Grad	OTHER	1998-03-13	2016-04-18	18.0999	18-20	DRAGA	PRIMORJE-GORSKI KOTAR	1	NO	YES	ONE PARENT	187.1
Primorje-Gorski Kotar	RIJEKA, Građevinska tehnička	PRI_Rij_Grad	OTHER	1998-02-17	2016-04-18	18.1656	18-20	VIŠKOVO	PRIMORJE-GORSKI KOTAR	1	YES	NO	ONE PARENT	189.5
Primorje-Gorski Kotar	RIJEKA, Građevinska tehnička	PRI_Rij_Grad	OTHER	1998-02-03	2016-04-18	18.204	18-20	RIJEKA	PRIMORJE-GORSKI KOTAR	3	NO	YES	ONE PARENT	173.2
Primorje-Gorski Kotar	RIJEKA, Građevinska tehnička	PRI_Rij_Grad	OTHER	1997-11-30	2016-04-18	18.3819	18-20	LOVRAN	PRIMORJE-GORSKI KOTAR	1	NO	YES	ONE PARENT	187.3
Primorje-Gorski Kotar	RIJEKA, Građevinska tehnička	PRI_Rij_Grad	OTHER	1997-09-26	2016-04-18	18.5599	18-20	KRK	PRIMORJE-GORSKI KOTAR	1	NO	YES	ONE PARENT	179.3
Primorje-Gorski Kotar	RIJEKA, Građevinska tehnička	PRI_Rij_Grad	OTHER	1997-08-28	2016-04-18	18.6393	18-20	VIŠKOVO	PRIMORJE-GORSKI KOTAR	1	YES	NO	ONE PARENT	182.4
Primorje-Gorski Kotar	RIJEKA, Građevinska tehnička	PRI_Rij_Grad	OTHER	1997-08-19	2016-04-18	18.6639	18-20	HRELJIN	PRIMORJE-GORSKI KOTAR	1	NO	YES	ONE PARENT	176
Primorje-Gorski Kotar	RIJEKA, Građevinska tehnička	PRI_Rij_Grad	OTHER	1997-08-06	2016-04-18	18.6995	18-20	VIŠKOVO	PRIMORJE-GORSKI KOTAR	1	NO	YES	ONE PARENT	183.4
Primorje-Gorski Kotar	RIJEKA, Građevinska tehnička	PRI_Rij_Grad	OTHER	1997-06-23	2016-04-18	18.82	18-20	BAŠKA	PRIMORJE-GORSKI KOTAR	1	NO	YES	ONE PARENT	174
Primorje-Gorski Kotar	RIJEKA, Građevinska tehnička	PRI_Rij_Grad	OTHER	1997-06-10	2016-04-18	18.8556	18-20	RIJEKA	PRIMORJE-GORSKI KOTAR	3	NO	YES	ONE PARENT	180.4
Primorje-Gorski Kotar	RIJEKA, Građevinska tehnička	PRI_Rij_Grad	OTHER	1997-05-16	2016-04-18	18.924	18-20	RIJEKA	PRIMORJE-GORSKI KOTAR	3	YES	NO	ONE PARENT	187.6
Primorje-Gorski Kotar	RIJEKA, Građevinska tehnička	PRI_Rij_Grad	OTHER	1996-12-29	2016-04-18	19.3018	18-20	RIJEKA	PRIMORJE-GORSKI KOTAR	3	YES	NO	ONE PARENT	182.9
Primorje-Gorski Kotar	RIJEKA, Građevinska tehnička	PRI_Rij_Grad	OTHER	1996-02-22	2016-04-18	20.1533	18-20	SENJ	LIKA-SENJ	1	NO	YES	ONE PARENT	181.1
Primorje-Gorski Kotar	RIJEKA, Prirodoslovna i grafička	PRI_Rij_Prir	OTHER	1998-03-24	2016-04-18	18.0698	18-20	RIJEKA	PRIMORJE-GORSKI KOTAR	3	YES	YES	BOTH PARENTS	184.4
Primorje-Gorski Kotar	RIJEKA, Prirodoslovna i grafička	PRI_Rij_Prir	OTHER	1998-02-12	2016-04-18	18.1793	18-20	RIJEKA	PRIMORJE-GORSKI KOTAR	3	YES	YES	BOTH PARENTS	178
Primorje-Gorski Kotar	RIJEKA, Prirodoslovna i grafička	PRI_Rij_Prir	OTHER	1998-01-26	2016-04-18	18.2259	18-20	MALI BRGUD	PRIMORJE-GORSKI KOTAR	1	YES	YES	BOTH PARENTS	198
Primorje-Gorski Kotar	RIJEKA, Prirodoslovna i grafička	PRI_Rij_Prir	OTHER	1997-10-04	2016-04-18	18.538	18-20	RIJEKA	PRIMORJE-GORSKI KOTAR	3	YES	YES	BOTH PARENTS	189.5
Primorje-Gorski Kotar	RIJEKA, Prirodoslovna i grafička	PRI_Rij_Prir	OTHER	1997-09-11	2016-04-18	18.601	18-20	RIJEKA	PRIMORJE-GORSKI KOTAR	3	YES	YES	BOTH PARENTS	193.3
Primorje-Gorski Kotar	RIJEKA, Prirodoslovna i grafička	PRI_Rij_Prir	OTHER	1996-10-15	2016-04-18	19.5072	18-20	RIJEKA	PRIMORJE-GORSKI KOTAR	3	YES	YES	BOTH PARENTS	181.3
Primorje-Gorski Kotar	RIJEKA, Prirodoslovna i grafička	PRI_Rij_Prir	OTHER	1998-02-15	2016-04-18	18.1711	18-20	RIJEKA	PRIMORJE-GORSKI KOTAR	3	NO	NO	NEITHER	186
Primorje-Gorski Kotar	RIJEKA, Prirodoslovna i grafička	PRI_Rij_Prir	OTHER	1998-02-08	2016-04-18	18.1903	18-20	RIJEKA	PRIMORJE-GORSKI KOTAR	3	NO	NO	NEITHER	181.5
Primorje-Gorski Kotar	RIJEKA, Prirodoslovna i grafička	PRI_Rij_Prir	OTHER	1998-01-30	2016-04-18	18.2149	18-20	RIJEKA	PRIMORJE-GORSKI KOTAR	3	NO	NO	NEITHER	183.2
Primorje-Gorski Kotar	RIJEKA, Prirodoslovna i grafička	PRI_Rij_Prir	OTHER	1998-01-14	2016-04-18	18.2587	18-20	MALINSKA	PRIMORJE-GORSKI KOTAR	1	NO	NO	NEITHER	185.4
Primorje-Gorski Kotar	RIJEKA, Prirodoslovna i grafička	PRI_Rij_Prir	OTHER	1997-12-21	2016-04-18	18.3244	18-20	VRBOVSKO	PRIMORJE-GORSKI KOTAR	1	NO	NO	NEITHER	188.4
Primorje-Gorski Kotar	RIJEKA, Prirodoslovna i grafička	PRI_Rij_Prir	OTHER	1997-11-26	2016-04-18	18.3929	18-20	RIJEKA	PRIMORJE-GORSKI KOTAR	3	NO	NO	NEITHER	184.1
Primorje-Gorski Kotar	RIJEKA, Prirodoslovna i grafička	PRI_Rij_Prir	OTHER	1997-11-19	2016-04-18	18.412	18-20	VIŠKOVO	PRIMORJE-GORSKI KOTAR	1	NO	NO	NEITHER	185.7
Primorje-Gorski Kotar	RIJEKA, Prirodoslovna i grafička	PRI_Rij_Prir	OTHER	1997-11-11	2016-04-18	18.4339	18-20	RIJEKA	PRIMORJE-GORSKI KOTAR	3	NO	NO	NEITHER	179.4
Primorje-Gorski Kotar	RIJEKA, Prirodoslovna i grafička	PRI_Rij_Prir	OTHER	1997-10-20	2016-04-18	18.4942	18-20	RIJEKA	PRIMORJE-GORSKI KOTAR	3	NO	NO	NEITHER	183.5
Primorje-Gorski Kotar	RIJEKA, Prirodoslovna i grafička	PRI_Rij_Prir	OTHER	1997-10-20	2016-04-18	18.4942	18-20	RIJEKA	PRIMORJE-GORSKI KOTAR	3	NO	NO	NEITHER	181.6
Primorje-Gorski Kotar	RIJEKA, Prirodoslovna i grafička	PRI_Rij_Prir	OTHER	1997-10-10	2016-04-18	18.5216	18-20	KRIŽIŠĆE	PRIMORJE-GORSKI KOTAR	1	NO	NO	NEITHER	178.5
Primorje-Gorski Kotar	RIJEKA, Prirodoslovna i grafička	PRI_Rij_Prir	OTHER	1997-10-08	2016-04-18	18.527	18-20	GROBNIK	PRIMORJE-GORSKI KOTAR	1	NO	NO	NEITHER	175
Primorje-Gorski Kotar	RIJEKA, Prirodoslovna i grafička	PRI_Rij_Prir	OTHER	1997-09-17	2016-04-18	18.5845	18-20	BAKAR	PRIMORJE-GORSKI KOTAR	1	NO	NO	NEITHER	179
Primorje-Gorski Kotar	RIJEKA, Prirodoslovna i grafička	PRI_Rij_Prir	OTHER	1997-08-26	2016-04-18	18.6448	18-20	RIJEKA	PRIMORJE-GORSKI KOTAR	3	NO	NO	NEITHER	171.1
Primorje-Gorski Kotar	RIJEKA, Prirodoslovna i grafička	PRI_Rij_Prir	OTHER	1997-08-22	2016-04-18	18.6557	18-20	UMAG	ISTRA	2	NO	NO	NEITHER	168.5
Primorje-Gorski Kotar	RIJEKA, Prirodoslovna i grafička	PRI_Rij_Prir	OTHER	1997-07-17	2016-04-18	18.7543	18-20	RIJEKA	PRIMORJE-GORSKI KOTAR	3	NO	NO	NEITHER	183
Primorje-Gorski Kotar	RIJEKA, Prirodoslovna i grafička	PRI_Rij_Prir	OTHER	1997-07-14	2016-04-18	18.7625	18-20	OPATIJA	PRIMORJE-GORSKI KOTAR	2	NO	NO	NEITHER	173
Primorje-Gorski Kotar	RIJEKA, Prirodoslovna i grafička	PRI_Rij_Prir	OTHER	1997-06-17	2016-04-18	18.8364	18-20	MARINIĆI	PRIMORJE-GORSKI KOTAR	1	NO	NO	NEITHER	191.3
Primorje-Gorski Kotar	RIJEKA, Prirodoslovna i grafička	PRI_Rij_Prir	OTHER	1997-06-03	2016-04-18	18.8747	18-20	RIJEKA	PRIMORJE-GORSKI KOTAR	3	NO	NO	NEITHER	179
Primorje-Gorski Kotar	RIJEKA, Prirodoslovna i grafička	PRI_Rij_Prir	OTHER	1997-05-29	2016-04-18	18.8884	18-20	RIJEKA	PRIMORJE-GORSKI KOTAR	3	NO	NO	NEITHER	177.8
Primorje-Gorski Kotar	RIJEKA, Prirodoslovna i grafička	PRI_Rij_Prir	OTHER	1997-05-19	2016-04-18	18.9158	18-20	RIJEKA	PRIMORJE-GORSKI KOTAR	3	NO	NO	NEITHER	179.3
Primorje-Gorski Kotar	RIJEKA, Prirodoslovna i grafička	PRI_Rij_Prir	OTHER	1996-05-20	2016-04-18	19.9124	18-20	PERMANI	PRIMORJE-GORSKI KOTAR	1	NO	NO	NEITHER	167.8
Primorje-Gorski Kotar	RIJEKA, Prirodoslovna i grafička	PRI_Rij_Prir	OTHER	1998-03-03	2016-04-18	18.1273	18-20	VEPRINAC	PRIMORJE-GORSKI KOTAR	1	YES	NO	ONE PARENT	189.2
Primorje-Gorski Kotar	RIJEKA, Prirodoslovna i grafička	PRI_Rij_Prir	OTHER	1998-01-27	2016-04-18	18.2231	18-20	RIJEKA	PRIMORJE-GORSKI KOTAR	3	NO	YES	ONE PARENT	178.5
Primorje-Gorski Kotar	RIJEKA, Prirodoslovna i grafička	PRI_Rij_Prir	OTHER	1998-01-04	2016-04-18	18.2861	18-20	RIJEKA	PRIMORJE-GORSKI KOTAR	3	YES	NO	ONE PARENT	180.1
Primorje-Gorski Kotar	RIJEKA, Prirodoslovna i grafička	PRI_Rij_Prir	OTHER	1997-09-22	2016-04-18	18.5708	18-20	RIJEKA	PRIMORJE-GORSKI KOTAR	3	NO	YES	ONE PARENT	181.5
Primorje-Gorski Kotar	RIJEKA, Prirodoslovna i grafička	PRI_Rij_Prir	OTHER	1997-09-12	2016-04-18	18.5982	18-20	RIJEKA	PRIMORJE-GORSKI KOTAR	3	NO	YES	ONE PARENT	176.7
Primorje-Gorski Kotar	RIJEKA, Prirodoslovna i grafička	PRI_Rij_Prir	OTHER	1997-08-24	2016-04-18	18.6502	18-20	LOVRAN	PRIMORJE-GORSKI KOTAR	1	NO	YES	ONE PARENT	181.9
Primorje-Gorski Kotar	RIJEKA, Prirodoslovna i grafička	PRI_Rij_Prir	OTHER	1997-08-07	2016-04-18	18.6968	18-20	RIJEKA	PRIMORJE-GORSKI KOTAR	3	NO	YES	ONE PARENT	169.5
Primorje-Gorski Kotar	RIJEKA, Prirodoslovna i grafička	PRI_Rij_Prir	OTHER	1997-07-12	2016-04-18	18.768	18-20	DRAMALJ	PRIMORJE-GORSKI KOTAR	1	NO	YES	ONE PARENT	180.7
Primorje-Gorski Kotar	RIJEKA, Prirodoslovna i grafička	PRI_Rij_Prir	OTHER	1997-05-25	2016-04-18	18.8994	18-20	KRASICA	PRIMORJE-GORSKI KOTAR	1	NO	YES	ONE PARENT	182.4
Primorje-Gorski Kotar	RIJEKA, Prirodoslovna i grafička	PRI_Rij_Prir	OTHER	1997-05-19	2016-04-18	18.9158	18-20	VIŠKOVO	PRIMORJE-GORSKI KOTAR	1	NO	YES	ONE PARENT	186.8
Primorje-Gorski Kotar	RIJEKA, Prirodoslovna i grafička	PRI_Rij_Prir	OTHER	1997-03-01	2016-04-18	19.1321	18-20	KOSTAV	PRIMORJE-GORSKI KOTAR	1	NO	YES	ONE PARENT	172.8
Primorje-Gorski Kotar	RIJEKA, Prirodoslovna i grafička	PRI_Rij_Prir	OTHER	1996-10-23	2016-04-18	19.4853	18-20	MATULJI	PRIMORJE-GORSKI KOTAR	1	NO	YES	ONE PARENT	186.5
Primorje-Gorski Kotar	RIJEKA, Prirodoslovna i grafička	PRI_Rij_Prir	OTHER	1996-07-31	2016-04-18	19.7153	18-20	KOSTAV	PRIMORJE-GORSKI KOTAR	1	YES	NO	ONE PARENT	177
Primorje-Gorski Kotar	RIJEKA, Prometna	PRI_Rij_Prom	OTHER	1998-02-26	2016-04-18	18.141	18-20	RIJEKA	PRIMORJE-GORSKI KOTAR	3	YES	YES	BOTH PARENTS	180.6
Primorje-Gorski Kotar	RIJEKA, Prometna	PRI_Rij_Prom	OTHER	1997-12-10	2016-04-18	18.3546	18-20	RIJEKA	PRIMORJE-GORSKI KOTAR	3	NO	NO	NEITHER	176.5
Primorje-Gorski Kotar	RIJEKA, Prometna	PRI_Rij_Prom	OTHER	1997-11-12	2016-04-18	18.4312	18-20	VIŠKOVO	PRIMORJE-GORSKI KOTAR	1	NO	NO	NEITHER	178.6
Primorje-Gorski Kotar	RIJEKA, Prometna	PRI_Rij_Prom	OTHER	1997-10-13	2016-04-18	18.5133	18-20	KRASNO	LIKA-SENJ	1	NO	NO	NEITHER	180.2
Primorje-Gorski Kotar	RIJEKA, Prometna	PRI_Rij_Prom	OTHER	1997-09-28	2016-04-18	18.5544	18-20	RIJEKA	PRIMORJE-GORSKI KOTAR	3	NO	NO	NEITHER	184
Primorje-Gorski Kotar	RIJEKA, Prometna	PRI_Rij_Prom	OTHER	1997-09-09	2016-04-18	18.6064	18-20	RIJEKA	PRIMORJE-GORSKI KOTAR	3	NO	NO	NEITHER	195.3
Primorje-Gorski Kotar	RIJEKA, Prometna	PRI_Rij_Prom	OTHER	1997-08-24	2016-04-18	18.6502	18-20	VIŠKOVO	PRIMORJE-GORSKI KOTAR	1	NO	NO	NEITHER	190.5
Primorje-Gorski Kotar	RIJEKA, Prometna	PRI_Rij_Prom	OTHER	1997-08-19	2016-04-18	18.6639	18-20	RIJEKA	PRIMORJE-GORSKI KOTAR	3	NO	NO	NEITHER	191.2
Primorje-Gorski Kotar	RIJEKA, Prometna	PRI_Rij_Prom	OTHER	1997-07-31	2016-04-18	18.7159	18-20	RIJEKA	PRIMORJE-GORSKI KOTAR	3	NO	NO	NEITHER	172.7
Primorje-Gorski Kotar	RIJEKA, Prometna	PRI_Rij_Prom	OTHER	1997-07-29	2016-04-18	18.7214	18-20	DONJI LAPAC	LIKA-SENJ	1	NO	NO	NEITHER	182.4
Primorje-Gorski Kotar	RIJEKA, Prometna	PRI_Rij_Prom	OTHER	1997-06-20	2016-04-18	18.8282	18-20	RIJEKA	PRIMORJE-GORSKI KOTAR	3	NO	NO	NEITHER	192
Primorje-Gorski Kotar	RIJEKA, Prometna	PRI_Rij_Prom	OTHER	1997-06-12	2016-04-18	18.8501	18-20	RIJEKA	PRIMORJE-GORSKI KOTAR	3	NO	NO	NEITHER	177
Primorje-Gorski Kotar	RIJEKA, Prometna	PRI_Rij_Prom	OTHER	1997-06-10	2016-04-18	18.8556	18-20	MARČELJI	PRIMORJE-GORSKI KOTAR	1	NO	NO	NEITHER	198.4
Primorje-Gorski Kotar	RIJEKA, Prometna	PRI_Rij_Prom	OTHER	1997-05-03	2016-04-18	18.9596	18-20	RIJEKA	PRIMORJE-GORSKI KOTAR	3	NO	NO	NEITHER	178
Primorje-Gorski Kotar	RIJEKA, Prometna	PRI_Rij_Prom	OTHER	1997-04-08	2016-04-18	19.0281	18-20	RIJEKA	PRIMORJE-GORSKI KOTAR	3	NO	NO	NEITHER	194.2
Primorje-Gorski Kotar	RIJEKA, Prometna	PRI_Rij_Prom	OTHER	1997-03-19	2016-04-18	19.0828	18-20	RIJEKA	PRIMORJE-GORSKI KOTAR	3	NO	NO	NEITHER	176
Primorje-Gorski Kotar	RIJEKA, Prometna	PRI_Rij_Prom	OTHER	1997-07-30	2016-04-18	18.7187	18-20	RIJEKA	PRIMORJE-GORSKI KOTAR	3	NO	YES	ONE PARENT	180.2
Primorje-Gorski Kotar	RIJEKA, Prometna	PRI_Rij_Prom	OTHER	1997-03-14	2016-04-18	19.0965	18-20	KOSTRENA	PRIMORJE-GORSKI KOTAR	1	YES	NO	ONE PARENT	175
Primorje-Gorski Kotar	RIJEKA, Prometna	PRI_Rij_Prom	OTHER	1995-11-08	2016-04-18	20.4435	18-20	RIJEKA	PRIMORJE-GORSKI KOTAR	3	NO	YES	ONE PARENT	184.5
Primorje-Gorski Kotar	RIJEKA, Prva riječka hrvatska gimnazija	PRI_Rij_PrvaGim	GIMNAZIJA	1998-05-17	2016-04-18	17.922	17	RIJEKA	PRIMORJE-GORSKI KOTAR	3	YES	YES	BOTH PARENTS	186.7
Primorje-Gorski Kotar	RIJEKA, Prva riječka hrvatska gimnazija	PRI_Rij_PrvaGim	GIMNAZIJA	1998-04-09	2016-04-18	18.026	18-20	RIJEKA	PRIMORJE-GORSKI KOTAR	3	YES	YES	BOTH PARENTS	187.7
Primorje-Gorski Kotar	RIJEKA, Prva riječka hrvatska gimnazija	PRI_Rij_PrvaGim	GIMNAZIJA	1998-02-06	2016-04-18	18.1958	18-20	ŠMRIKA	PRIMORJE-GORSKI KOTAR	1	YES	YES	BOTH PARENTS	183.7
Primorje-Gorski Kotar	RIJEKA, Prva riječka hrvatska gimnazija	PRI_Rij_PrvaGim	GIMNAZIJA	1997-12-18	2016-04-18	18.3326	18-20	RIJEKA	PRIMORJE-GORSKI KOTAR	3	YES	YES	BOTH PARENTS	182.4
Primorje-Gorski Kotar	RIJEKA, Prva riječka hrvatska gimnazija	PRI_Rij_PrvaGim	GIMNAZIJA	1997-11-09	2016-04-18	18.4394	18-20	KOSTAV	PRIMORJE-GORSKI KOTAR	1	YES	YES	BOTH PARENTS	181.9
Primorje-Gorski Kotar	RIJEKA, Prva riječka hrvatska gimnazija	PRI_Rij_PrvaGim	GIMNAZIJA	1997-10-15	2016-04-18	18.5079	18-20	OPATIJA	PRIMORJE-GORSKI KOTAR	2	YES	YES	BOTH PARENTS	179.9
Primorje-Gorski Kotar	RIJEKA, Prva riječka hrvatska gimnazija	PRI_Rij_PrvaGim	GIMNAZIJA	1997-10-10	2016-04-18	18.5216	18-20	RIJEKA	PRIMORJE-GORSKI KOTAR	3	YES	YES	BOTH PARENTS	198.5
Primorje-Gorski Kotar	RIJEKA, Prva riječka hrvatska gimnazija	PRI_Rij_PrvaGim	GIMNAZIJA	1997-08-28	2016-04-18	18.6393	18-20	RIJEKA	PRIMORJE-GORSKI KOTAR	3	YES	YES	BOTH PARENTS	178.5
Primorje-Gorski Kotar	RIJEKA, Prva riječka hrvatska gimnazija	PRI_Rij_PrvaGim	GIMNAZIJA	1997-07-09	2016-04-18	18.7762	18-20	KASTAV	PRIMORJE-GORSKI KOTAR	2	YES	YES	BOTH PARENTS	178.7
Primorje-Gorski Kotar	RIJEKA, Prva riječka hrvatska gimnazija	PRI_Rij_PrvaGim	GIMNAZIJA	1997-07-07	2016-04-18	18.7817	18-20	RIJEKA	PRIMORJE-GORSKI KOTAR	3	YES	YES	BOTH PARENTS	180.2
Primorje-Gorski Kotar	RIJEKA, Prva riječka hrvatska gimnazija	PRI_Rij_PrvaGim	GIMNAZIJA	1997-06-25	2016-04-18	18.8145	18-20	RIJEKA	PRIMORJE-GORSKI KOTAR	3	YES	YES	BOTH PARENTS	185.8
Primorje-Gorski Kotar	RIJEKA, Prva riječka hrvatska gimnazija	PRI_Rij_PrvaGim	GIMNAZIJA	1997-05-21	2016-04-18	18.9103	18-20	RIJEKA	PRIMORJE-GORSKI KOTAR	3	YES	YES	BOTH PARENTS	166.6
Primorje-Gorski Kotar	RIJEKA, Prva riječka hrvatska gimnazija	PRI_Rij_PrvaGim	GIMNAZIJA	1997-05-07	2016-04-18	18.9487	18-20	RIJEKA	PRIMORJE-GORSKI KOTAR	3	YES	YES	BOTH PARENTS	189
Primorje-Gorski Kotar	RIJEKA, Prva riječka hrvatska gimnazija	PRI_Rij_PrvaGim	GIMNAZIJA	1998-09-18	2016-04-18	17.5825	17	MATULJI	PRIMORJE-GORSKI KOTAR	1	NO	NO	NEITHER	177.7
Primorje-Gorski Kotar	RIJEKA, Prva riječka hrvatska gimnazija	PRI_Rij_PrvaGim	GIMNAZIJA	1998-02-24	2016-04-18	18.1465	18-20	VIŠKOVO	PRIMORJE-GORSKI KOTAR	1	NO	NO	NEITHER	178.7
Primorje-Gorski Kotar	RIJEKA, Prva riječka hrvatska gimnazija	PRI_Rij_PrvaGim	GIMNAZIJA	1998-02-06	2016-04-18	18.1958	18-20	RIJEKA	PRIMORJE-GORSKI KOTAR	3	NO	NO	NEITHER	182.3
Primorje-Gorski Kotar	RIJEKA, Prva riječka hrvatska gimnazija	PRI_Rij_PrvaGim	GIMNAZIJA	1998-01-29	2016-04-18	18.2177	18-20	PLOMIN	ISTRA	1	NO	NO	NEITHER	187.4
Primorje-Gorski Kotar	RIJEKA, Prva riječka hrvatska gimnazija	PRI_Rij_PrvaGim	GIMNAZIJA	1998-01-01	2016-04-18	18.2943	18-20	RIJEKA	PRIMORJE-GORSKI KOTAR	3	NO	NO	NEITHER	184.4
Primorje-Gorski Kotar	RIJEKA, Prva riječka hrvatska gimnazija	PRI_Rij_PrvaGim	GIMNAZIJA	1997-12-16	2016-04-18	18.3381	18-20	RIJEKA	PRIMORJE-GORSKI KOTAR	3	NO	NO	NEITHER	180.3
Primorje-Gorski Kotar	RIJEKA, Prva riječka hrvatska gimnazija	PRI_Rij_PrvaGim	GIMNAZIJA	1997-12-11	2016-04-18	18.3518	18-20	RAB	PRIMORJE-GORSKI KOTAR	1	NO	NO	NEITHER	183.4
Primorje-Gorski Kotar	RIJEKA, Prva riječka hrvatska gimnazija	PRI_Rij_PrvaGim	GIMNAZIJA	1997-12-07	2016-04-18	18.3628	18-20	RIJEKA	PRIMORJE-GORSKI KOTAR	3	NO	NO	NEITHER	181
Primorje-Gorski Kotar	RIJEKA, Prva riječka hrvatska gimnazija	PRI_Rij_PrvaGim	GIMNAZIJA	1997-09-01	2016-04-18	18.6283	18-20	SROKI	PRIMORJE-GORSKI KOTAR	1	NO	NO	NEITHER	189.7
Primorje-Gorski Kotar	RIJEKA, Prva riječka hrvatska gimnazija	PRI_Rij_PrvaGim	GIMNAZIJA	1997-08-22	2016-04-18	18.6557	18-20	RIJEKA	PRIMORJE-GORSKI KOTAR	3	NO	NO	NEITHER	181.8
Primorje-Gorski Kotar	RIJEKA, Prva riječka hrvatska gimnazija	PRI_Rij_PrvaGim	GIMNAZIJA	1997-08-20	2016-04-18	18.6612	18-20	RIJEKA	PRIMORJE-GORSKI KOTAR	3	NO	NO	NEITHER	193.5
Primorje-Gorski Kotar	RIJEKA, Prva riječka hrvatska gimnazija	PRI_Rij_PrvaGim	GIMNAZIJA	1997-07-30	2016-04-18	18.7187	18-20	ŠMRIKA	PRIMORJE-GORSKI KOTAR	1	NO	NO	NEITHER	178.2
Primorje-Gorski Kotar	RIJEKA, Prva riječka hrvatska gimnazija	PRI_Rij_PrvaGim	GIMNAZIJA	1997-07-16	2016-04-18	18.757	18-20	RIJEKA	PRIMORJE-GORSKI KOTAR	3	NO	NO	NEITHER	183
Primorje-Gorski Kotar	RIJEKA, Prva riječka hrvatska gimnazija	PRI_Rij_PrvaGim	GIMNAZIJA	1997-06-28	2016-04-18	18.8063	18-20	KOSTAV	PRIMORJE-GORSKI KOTAR	1	NO	NO	NEITHER	190.4
Primorje-Gorski Kotar	RIJEKA, Prva riječka hrvatska gimnazija	PRI_Rij_PrvaGim	GIMNAZIJA	1997-06-27	2016-04-18	18.809	18-20	RIJEKA	PRIMORJE-GORSKI KOTAR	3	NO	NO	NEITHER	177.5
Primorje-Gorski Kotar	RIJEKA, Prva riječka hrvatska gimnazija	PRI_Rij_PrvaGim	GIMNAZIJA	1997-06-18	2016-04-18	18.8337	18-20	RIJEKA	PRIMORJE-GORSKI KOTAR	3	NO	NO	NEITHER	182.8
Primorje-Gorski Kotar	RIJEKA, Prva riječka hrvatska gimnazija	PRI_Rij_PrvaGim	GIMNAZIJA	1997-06-15	2016-04-18	18.8419	18-20	SENJ	LIKA-SENJ	1	NO	NO	NEITHER	186.1
Primorje-Gorski Kotar	RIJEKA, Prva riječka hrvatska gimnazija	PRI_Rij_PrvaGim	GIMNAZIJA	1997-06-15	2016-04-18	18.8419	18-20	RIJEKA	PRIMORJE-GORSKI KOTAR	3	NO	NO	NEITHER	195.7
Primorje-Gorski Kotar	RIJEKA, Prva riječka hrvatska gimnazija	PRI_Rij_PrvaGim	GIMNAZIJA	1997-05-31	2016-04-18	18.883	18-20	MATULJI	PRIMORJE-GORSKI KOTAR	1	NO	NO	NEITHER	179.5
Primorje-Gorski Kotar	RIJEKA, Prva riječka hrvatska gimnazija	PRI_Rij_PrvaGim	GIMNAZIJA	1997-05-24	2016-04-18	18.9021	18-20	RIJEKA	PRIMORJE-GORSKI KOTAR	3	NO	NO	NEITHER	193.5
Primorje-Gorski Kotar	RIJEKA, Prva riječka hrvatska gimnazija	PRI_Rij_PrvaGim	GIMNAZIJA	1997-05-21	2016-04-18	18.9103	18-20	VIŠKOVO	PRIMORJE-GORSKI KOTAR	1	NO	NO	NEITHER	189.7
Primorje-Gorski Kotar	RIJEKA, Prva riječka hrvatska gimnazija	PRI_Rij_PrvaGim	GIMNAZIJA	1997-04-23	2016-04-18	18.987	18-20	OPATIJA	PRIMORJE-GORSKI KOTAR	2	NO	NO	NEITHER	172.5
Primorje-Gorski Kotar	RIJEKA, Prva riječka hrvatska gimnazija	PRI_Rij_PrvaGim	GIMNAZIJA	1997-04-22	2016-04-18	18.9897	18-20	PAZIN	ISTRA	1	NO	NO	NEITHER	199.3
Primorje-Gorski Kotar	RIJEKA, Prva riječka hrvatska gimnazija	PRI_Rij_PrvaGim	GIMNAZIJA	1997-04-19	2016-04-18	18.9979	18-20	RIJEKA	PRIMORJE-GORSKI KOTAR	3	NO	NO	NEITHER	170.6
Primorje-Gorski Kotar	RIJEKA, Prva riječka hrvatska gimnazija	PRI_Rij_PrvaGim	GIMNAZIJA	1996-06-06	2016-04-18	19.8658	18-20	MATULJI	PRIMORJE-GORSKI KOTAR	1	NO	NO	NEITHER	176.4
Primorje-Gorski Kotar	RIJEKA, Prva riječka hrvatska gimnazija	PRI_Rij_PrvaGim	GIMNAZIJA	1996-05-30	2016-04-18	19.885	18-20	VIŠKOVO	PRIMORJE-GORSKI KOTAR	1	NO	NO	NEITHER	176.9
Primorje-Gorski Kotar	RIJEKA, Prva riječka hrvatska gimnazija	PRI_Rij_PrvaGim	GIMNAZIJA	1996-01-13	2016-04-18	20.2628	18-20	LABIN	ISTRA	2	NO	NO	NEITHER	183.1
Primorje-Gorski Kotar	RIJEKA, Prva riječka hrvatska gimnazija	PRI_Rij_PrvaGim	GIMNAZIJA	1998-09-20	2016-04-18	17.577	17	RIJEKA	PRIMORJE-GORSKI KOTAR	3	YES	NO	ONE PARENT	181.5
Primorje-Gorski Kotar	RIJEKA, Prva riječka hrvatska gimnazija	PRI_Rij_PrvaGim	GIMNAZIJA	1998-04-25	2016-04-18	17.9822	17	RIJEKA	PRIMORJE-GORSKI KOTAR	3	NO	YES	ONE PARENT	190.1
Primorje-Gorski Kotar	RIJEKA, Prva riječka hrvatska gimnazija	PRI_Rij_PrvaGim	GIMNAZIJA	1998-02-24	2016-04-18	18.1465	18-20	RIJEKA	PRIMORJE-GORSKI KOTAR	3	YES	NO	ONE PARENT	189.5
Primorje-Gorski Kotar	RIJEKA, Prva riječka hrvatska gimnazija	PRI_Rij_PrvaGim	GIMNAZIJA	1998-01-01	2016-04-18	18.2943	18-20	RIJEKA	PRIMORJE-GORSKI KOTAR	3	YES	NO	ONE PARENT	187
Primorje-Gorski Kotar	RIJEKA, Prva riječka hrvatska gimnazija	PRI_Rij_PrvaGim	GIMNAZIJA	1997-11-04	2016-04-18	18.4531	18-20	RIJEKA	PRIMORJE-GORSKI KOTAR	3	YES	NO	ONE PARENT	173.1
Primorje-Gorski Kotar	RIJEKA, Prva riječka hrvatska gimnazija	PRI_Rij_PrvaGim	GIMNAZIJA	1997-10-25	2016-04-18	18.4805	18-20	RIJEKA	PRIMORJE-GORSKI KOTAR	3	NO	YES	ONE PARENT	189.6
Primorje-Gorski Kotar	RIJEKA, Prva riječka hrvatska gimnazija	PRI_Rij_PrvaGim	GIMNAZIJA	1997-10-22	2016-04-18	18.4887	18-20	RIJEKA	PRIMORJE-GORSKI KOTAR	3	NO	YES	ONE PARENT	192.1
Primorje-Gorski Kotar	RIJEKA, Prva riječka hrvatska gimnazija	PRI_Rij_PrvaGim	GIMNAZIJA	1997-10-07	2016-04-18	18.5298	18-20	ČAVLE	PRIMORJE-GORSKI KOTAR	1	YES	NO	ONE PARENT	185.3
Primorje-Gorski Kotar	RIJEKA, Prva riječka hrvatska gimnazija	PRI_Rij_PrvaGim	GIMNAZIJA	1997-10-05	2016-04-18	18.5352	18-20	RIJEKA	PRIMORJE-GORSKI KOTAR	3	NO	YES	ONE PARENT	183.3
Primorje-Gorski Kotar	RIJEKA, Prva riječka hrvatska gimnazija	PRI_Rij_PrvaGim	GIMNAZIJA	1997-07-29	2016-04-18	18.7214	18-20	RIJEKA	PRIMORJE-GORSKI KOTAR	3	YES	NO	ONE PARENT	184.7
Primorje-Gorski Kotar	RIJEKA, Prva riječka hrvatska gimnazija	PRI_Rij_PrvaGim	GIMNAZIJA	1997-07-25	2016-04-18	18.7324	18-20	RIJEKA	PRIMORJE-GORSKI KOTAR	3	YES	NO	ONE PARENT	173.9
Primorje-Gorski Kotar	RIJEKA, Prva riječka hrvatska gimnazija	PRI_Rij_PrvaGim	GIMNAZIJA	1997-07-24	2016-04-18	18.7351	18-20	MATULJI	PRIMORJE-GORSKI KOTAR	1	YES	NO	ONE PARENT	192.1
Primorje-Gorski Kotar	RIJEKA, Prva riječka hrvatska gimnazija	PRI_Rij_PrvaGim	GIMNAZIJA	1997-07-10	2016-04-18	18.7734	18-20	RIJEKA	PRIMORJE-GORSKI KOTAR	3	NO	YES	ONE PARENT	182.8
Primorje-Gorski Kotar	RIJEKA, Prva riječka hrvatska gimnazija	PRI_Rij_PrvaGim	GIMNAZIJA	1997-07-09	2016-04-18	18.7762	18-20	MATULJI	PRIMORJE-GORSKI KOTAR	1	YES	NO	ONE PARENT	173
Primorje-Gorski Kotar	RIJEKA, Prva riječka hrvatska gimnazija	PRI_Rij_PrvaGim	GIMNAZIJA	1997-05-17	2016-04-18	18.9213	18-20	MALINSKA	PRIMORJE-GORSKI KOTAR	1	YES	NO	ONE PARENT	178.4
Primorje-Gorski Kotar	RIJEKA, Prva riječka hrvatska gimnazija	PRI_Rij_PrvaGim	GIMNAZIJA	1997-05-11	2016-04-18	18.9377	18-20	RIJEKA	PRIMORJE-GORSKI KOTAR	3	NO	YES	ONE PARENT	181.2
Primorje-Gorski Kotar	RIJEKA, Prva riječka hrvatska gimnazija	PRI_Rij_PrvaGim	GIMNAZIJA	1997-05-08	2016-04-18	18.9459	18-20	RIJEKA	PRIMORJE-GORSKI KOTAR	3	YES	NO	ONE PARENT	175.9
Primorje-Gorski Kotar	RIJEKA, Prva riječka hrvatska gimnazija	PRI_Rij_PrvaGim	GIMNAZIJA	1997-05-02	2016-04-18	18.9624	18-20	RIJEKA	PRIMORJE-GORSKI KOTAR	3	NO	YES	ONE PARENT	181.8
Primorje-Gorski Kotar	RIJEKA, Prva riječka hrvatska gimnazija	PRI_Rij_PrvaGim	GIMNAZIJA	1996-09-26	2016-04-18	19.5592	18-20	RIJEKA	PRIMORJE-GORSKI KOTAR	3	NO	YES	ONE PARENT	186.8
Primorje-Gorski Kotar	RIJEKA, Prva sušačka hrvatska gimnazija	PRI_Rij_PrvaSus	GIMNAZIJA	1998-03-16	2016-04-19	18.0945	18-20	RIJEKA	PRIMORJE-GORSKI KOTAR	3	YES	YES	BOTH PARENTS	179
Primorje-Gorski Kotar	RIJEKA, Prva sušačka hrvatska gimnazija	PRI_Rij_PrvaSus	GIMNAZIJA	1998-01-11	2016-04-19	18.2697	18-20	RIJEKA	PRIMORJE-GORSKI KOTAR	3	YES	YES	BOTH PARENTS	183.7
Primorje-Gorski Kotar	RIJEKA, Prva sušačka hrvatska gimnazija	PRI_Rij_PrvaSus	GIMNAZIJA	1997-10-14	2016-04-19	18.5133	18-20	RIJEKA	PRIMORJE-GORSKI KOTAR	3	YES	YES	BOTH PARENTS	193.1
Primorje-Gorski Kotar	RIJEKA, Prva sušačka hrvatska gimnazija	PRI_Rij_PrvaSus	GIMNAZIJA	1997-07-10	2016-04-19	18.7762	18-20	RIJEKA	PRIMORJE-GORSKI KOTAR	3	YES	YES	BOTH PARENTS	188.2
Primorje-Gorski Kotar	RIJEKA, Prva sušačka hrvatska gimnazija	PRI_Rij_PrvaSus	GIMNAZIJA	1997-07-08	2016-04-19	18.7817	18-20	RIJEKA	PRIMORJE-GORSKI KOTAR	3	YES	YES	BOTH PARENTS	193.3
Primorje-Gorski Kotar	RIJEKA, Prva sušačka hrvatska gimnazija	PRI_Rij_PrvaSus	GIMNAZIJA	1997-07-06	2016-04-19	18.7871	18-20	VIŠKOVO	PRIMORJE-GORSKI KOTAR	1	YES	YES	BOTH PARENTS	170.6
Primorje-Gorski Kotar	RIJEKA, Prva sušačka hrvatska gimnazija	PRI_Rij_PrvaSus	GIMNAZIJA	1998-02-28	2016-04-19	18.1383	18-20	RIJEKA	PRIMORJE-GORSKI KOTAR	3	NO	NO	NEITHER	185.7
Primorje-Gorski Kotar	RIJEKA, Prva sušačka hrvatska gimnazija	PRI_Rij_PrvaSus	GIMNAZIJA	1997-12-19	2016-04-19	18.3326	18-20	RIJEKA	PRIMORJE-GORSKI KOTAR	3	NO	NO	NEITHER	174
Primorje-Gorski Kotar	RIJEKA, Prva sušačka hrvatska gimnazija	PRI_Rij_PrvaSus	GIMNAZIJA	1997-12-08	2016-04-19	18.3628	18-20	DRAŽICE	PRIMORJE-GORSKI KOTAR	1	NO	NO	NEITHER	190.7
Primorje-Gorski Kotar	RIJEKA, Prva sušačka hrvatska gimnazija	PRI_Rij_PrvaSus	GIMNAZIJA	1997-08-26	2016-04-19	18.6475	18-20	RIJEKA	PRIMORJE-GORSKI KOTAR	3	NO	NO	NEITHER	184.2
Primorje-Gorski Kotar	RIJEKA, Prva sušačka hrvatska gimnazija	PRI_Rij_PrvaSus	GIMNAZIJA	1997-06-11	2016-04-19	18.8556	18-20	DRAŽICE	PRIMORJE-GORSKI KOTAR	1	NO	NO	NEITHER	183.2
Primorje-Gorski Kotar	RIJEKA, Prva sušačka hrvatska gimnazija	PRI_Rij_PrvaSus	GIMNAZIJA	1997-05-23	2016-04-19	18.9076	18-20	RIJEKA	PRIMORJE-GORSKI KOTAR	3	NO	NO	NEITHER	175
Primorje-Gorski Kotar	RIJEKA, Prva sušačka hrvatska gimnazija	PRI_Rij_PrvaSus	GIMNAZIJA	1998-03-12	2016-04-19	18.1054	18-20	VIŠKOVO	PRIMORJE-GORSKI KOTAR	1	NO	YES	ONE PARENT	180.4
Primorje-Gorski Kotar	RIJEKA, Prva sušačka hrvatska gimnazija	PRI_Rij_PrvaSus	GIMNAZIJA	1998-02-11	2016-04-19	18.1848	18-20	RIJEKA	PRIMORJE-GORSKI KOTAR	3	YES	NO	ONE PARENT	174.1
Primorje-Gorski Kotar	RIJEKA, Prva sušačka hrvatska gimnazija	PRI_Rij_PrvaSus	GIMNAZIJA	1998-02-10	2016-04-19	18.1875	18-20	RIJEKA	PRIMORJE-GORSKI KOTAR	3	NO	YES	ONE PARENT	182.7
Primorje-Gorski Kotar	RIJEKA, Prva sušačka hrvatska gimnazija	PRI_Rij_PrvaSus	GIMNAZIJA	1997-12-27	2016-04-19	18.3107	18-20	RIJEKA	PRIMORJE-GORSKI KOTAR	3	YES	NO	ONE PARENT	175.9
Primorje-Gorski Kotar	RIJEKA, Prva sušačka hrvatska gimnazija	PRI_Rij_PrvaSus	GIMNAZIJA	1997-10-30	2016-04-19	18.4695	18-20	RIJEKA	PRIMORJE-GORSKI KOTAR	3	NO	YES	ONE PARENT	189.6
Primorje-Gorski Kotar	RIJEKA, Prva sušačka hrvatska gimnazija	PRI_Rij_PrvaSus	GIMNAZIJA	1997-10-25	2016-04-19	18.4832	18-20	BAKAR	PRIMORJE-GORSKI KOTAR	1	NO	YES	ONE PARENT	179.4
Primorje-Gorski Kotar	RIJEKA, Prva sušačka hrvatska gimnazija	PRI_Rij_PrvaSus	GIMNAZIJA	1997-09-22	2016-04-19	18.5736	18-20	RIJEKA	PRIMORJE-GORSKI KOTAR	3	NO	YES	ONE PARENT	179.2
Primorje-Gorski Kotar	RIJEKA, Prva sušačka hrvatska gimnazija	PRI_Rij_PrvaSus	GIMNAZIJA	1997-09-03	2016-04-19	18.6256	18-20	RIJEKA	PRIMORJE-GORSKI KOTAR	3	NO	YES	ONE PARENT	184.7
Primorje-Gorski Kotar	RIJEKA, Prva sušačka hrvatska gimnazija	PRI_Rij_PrvaSus	GIMNAZIJA	1997-08-14	2016-04-19	18.6804	18-20	RIJEKA	PRIMORJE-GORSKI KOTAR	3	YES	NO	ONE PARENT	184.2
Primorje-Gorski Kotar	RIJEKA, Prva sušačka hrvatska gimnazija	PRI_Rij_PrvaSus	GIMNAZIJA	1997-08-10	2016-04-19	18.6913	18-20	RIJEKA	PRIMORJE-GORSKI KOTAR	3	YES	NO	ONE PARENT	178.1
Primorje-Gorski Kotar	RIJEKA, Prva sušačka hrvatska gimnazija	PRI_Rij_PrvaSus	GIMNAZIJA	1997-08-08	2016-04-19	18.6968	18-20	RIJEKA	PRIMORJE-GORSKI KOTAR	3	YES	NO	ONE PARENT	178.2
Primorje-Gorski Kotar	RIJEKA, Prva sušačka hrvatska gimnazija	PRI_Rij_PrvaSus	GIMNAZIJA	1997-06-24	2016-04-19	18.82	18-20	RIJEKA	PRIMORJE-GORSKI KOTAR	3	NO	YES	ONE PARENT	183
Primorje-Gorski Kotar	RIJEKA, Prva sušačka hrvatska gimnazija	PRI_Rij_PrvaSus	GIMNAZIJA	1997-05-02	2016-04-19	18.9651	18-20	VEPRINAC	PRIMORJE-GORSKI KOTAR	1	NO	YES	ONE PARENT	171.5
Primorje-Gorski Kotar	RIJEKA, Prva sušačka hrvatska gimnazija	PRI_Rij_PrvaSus	GIMNAZIJA	1997-04-19	2016-04-19	19.0007	18-20	RIJEKA	PRIMORJE-GORSKI KOTAR	3	NO	YES	ONE PARENT	188.8
Primorje-Gorski Kotar	RIJEKA, Prva sušačka hrvatska gimnazija	PRI_Rij_PrvaSus	GIMNAZIJA	1997-04-17	2016-04-19	19.0062	18-20	VIŠKOVO	PRIMORJE-GORSKI KOTAR	1	YES	NO	ONE PARENT	169.3
Split-Dalmacija	IMOTSKI, Gimnazija dr. M. Ujevića & Ekonomska škola	SPL_Imo_Gim	GIMNAZIJA	1998-03-31	2016-02-29	17.9165	17	IMOTSKI	SPLIT-DALMACIJA	2	NO	NO	NEITHER	182
Split-Dalmacija	IMOTSKI, Gimnazija dr. M. Ujevića & Ekonomska škola	SPL_Imo_Gim	GIMNAZIJA	1998-02-17	2016-02-29	18.0315	18-20	VINJANI DONJI	SPLIT-DALMACIJA	1	NO	NO	NEITHER	195.6
Split-Dalmacija	IMOTSKI, Gimnazija dr. M. Ujevića & Ekonomska škola	SPL_Imo_Gim	GIMNAZIJA	1998-01-23	2016-02-29	18.0999	18-20	VINJANI GORNJI	SPLIT-DALMACIJA	1	NO	NO	NEITHER	181.6
Split-Dalmacija	IMOTSKI, Gimnazija dr. M. Ujevića & Ekonomska škola	SPL_Imo_Gim	GIMNAZIJA	1997-11-22	2016-02-29	18.2697	18-20	IMOTSKI	SPLIT-DALMACIJA	2	NO	NO	NEITHER	190.3
Split-Dalmacija	IMOTSKI, Gimnazija dr. M. Ujevića & Ekonomska škola	SPL_Imo_Gim	GIMNAZIJA	1997-10-24	2016-02-29	18.3491	18-20	PODBABLJE	SPLIT-DALMACIJA	1	NO	NO	NEITHER	183.9
Split-Dalmacija	IMOTSKI, Gimnazija dr. M. Ujevića & Ekonomska škola	SPL_Imo_Gim	GIMNAZIJA	1997-10-12	2016-02-29	18.3819	18-20	IMOTSKI	SPLIT-DALMACIJA	2	NO	NO	NEITHER	181.4
Split-Dalmacija	IMOTSKI, Gimnazija dr. M. Ujevića & Ekonomska škola	SPL_Imo_Gim	GIMNAZIJA	1997-09-18	2016-02-29	18.4476	18-20	IMOTSKI	SPLIT-DALMACIJA	2	NO	NO	NEITHER	189.4
Split-Dalmacija	IMOTSKI, Gimnazija dr. M. Ujevića & Ekonomska škola	SPL_Imo_Gim	GIMNAZIJA	1997-09-05	2016-02-29	18.4832	18-20	IMOTSKI	SPLIT-DALMACIJA	2	NO	NO	NEITHER	184.4
Split-Dalmacija	IMOTSKI, Gimnazija dr. M. Ujevića & Ekonomska škola	SPL_Imo_Gim	GIMNAZIJA	1997-08-10	2016-02-29	18.5544	18-20	VINJANI DONJI	SPLIT-DALMACIJA	1	NO	NO	NEITHER	182.5
Split-Dalmacija	IMOTSKI, Gimnazija dr. M. Ujevića & Ekonomska škola	SPL_Imo_Gim	GIMNAZIJA	1997-06-27	2016-02-29	18.6749	18-20	DONJI PROLOŽAC	SPLIT-DALMACIJA	1	NO	NO	NEITHER	171.2
Split-Dalmacija	IMOTSKI, Gimnazija dr. M. Ujevića & Ekonomska škola	SPL_Imo_Gim	GIMNAZIJA	1997-06-08	2016-02-29	18.7269	18-20	IMOTSKI	SPLIT-DALMACIJA	2	NO	NO	NEITHER	201.8
Split-Dalmacija	IMOTSKI, Gimnazija dr. M. Ujevića & Ekonomska škola	SPL_Imo_Gim	GIMNAZIJA	1997-06-01	2016-02-29	18.7461	18-20	IMOTSKI	SPLIT-DALMACIJA	2	NO	NO	NEITHER	192.5
Split-Dalmacija	IMOTSKI, Gimnazija dr. M. Ujevića & Ekonomska škola	SPL_Imo_Gim	GIMNAZIJA	1997-05-26	2016-02-29	18.7625	18-20	ZMIJAVCI	SPLIT-DALMACIJA	1	NO	NO	NEITHER	191.6
Split-Dalmacija	IMOTSKI, Gimnazija dr. M. Ujevića & Ekonomska škola	SPL_Imo_Gim	GIMNAZIJA	1997-05-05	2016-02-29	18.82	18-20	CISTA PROVO	SPLIT-DALMACIJA	1	NO	NO	NEITHER	183.6
Split-Dalmacija	IMOTSKI, Gimnazija dr. M. Ujevića & Ekonomska škola	SPL_Imo_Gim	GIMNAZIJA	1997-03-30	2016-02-29	18.9185	18-20	LOVREĆ	SPLIT-DALMACIJA	1	NO	NO	NEITHER	181.8
Split-Dalmacija	IMOTSKI, Gimnazija dr. M. Ujevića & Ekonomska škola	SPL_Imo_Gim	GIMNAZIJA	1997-02-10	2016-02-29	19.05	18-20	IMOTSKI	SPLIT-DALMACIJA	2	NO	NO	NEITHER	195
Split-Dalmacija	IMOTSKI, Gimnazija dr. M. Ujevića & Ekonomska škola	SPL_Imo_Gim	GIMNAZIJA	1998-04-02	2016-02-29	17.911	17	IMOTSKI	SPLIT-DALMACIJA	2	YES	NO	ONE PARENT	181.8
Split-Dalmacija	IMOTSKI, Gimnazija dr. M. Ujevića & Ekonomska škola	SPL_Imo_Gim	GIMNAZIJA	1997-11-21	2016-02-29	18.2724	18-20	VIR	ZADAR	1	NO	YES	ONE PARENT	188.9
Split-Dalmacija	IMOTSKI, Gimnazija dr. M. Ujevića & Ekonomska škola	SPL_Imo_Gim	GIMNAZIJA	1997-11-17	2016-02-29	18.2834	18-20	VINJANI DONJI	SPLIT-DALMACIJA	1	NO	YES	ONE PARENT	177.7
Split-Dalmacija	IMOTSKI, Gimnazija dr. M. Ujevića & Ekonomska škola	SPL_Imo_Gim	GIMNAZIJA	1997-09-15	2016-02-29	18.4559	18-20	IMOTSKI	SPLIT-DALMACIJA	2	YES	NO	ONE PARENT	179.3
Split-Dalmacija	IMOTSKI, Gimnazija dr. M. Ujevića & Ekonomska škola	SPL_Imo_Gim	GIMNAZIJA	1997-08-12	2016-02-29	18.5489	18-20	ZMIJAVCI	SPLIT-DALMACIJA	1	NO	YES	ONE PARENT	186.8
Split-Dalmacija	IMOTSKI, Gimnazija dr. M. Ujevića & Ekonomska škola	SPL_Imo_Gim	GIMNAZIJA	1997-04-08	2016-02-29	18.8939	18-20	IMOTSKI	SPLIT-DALMACIJA	2	YES	NO	ONE PARENT	187.8
Split-Dalmacija	IMOTSKI, Obrtničko-industrijska	SPL_Imo_Obr	OTHER	1999-10-05	2017-05-10	17.5962	17	GRUBINE	SPLIT-DALMACIJA	1	NO	NO	NEITHER	177.5
Split-Dalmacija	IMOTSKI, Obrtničko-industrijska	SPL_Imo_Obr	OTHER	1999-10-03	2017-05-10	17.6016	17	LOVREĆ	SPLIT-DALMACIJA	1	NO	NO	NEITHER	180.9
Split-Dalmacija	IMOTSKI, Obrtničko-industrijska	SPL_Imo_Obr	OTHER	1999-10-03	2017-05-10	17.6016	17	MEDVIDOVCIĆA DRAGA	SPLIT-DALMACIJA	1	NO	NO	NEITHER	179.2
Split-Dalmacija	IMOTSKI, Obrtničko-industrijska	SPL_Imo_Obr	OTHER	1999-07-21	2017-05-10	17.8042	17	IMOTSKI	SPLIT-DALMACIJA	2	NO	NO	NEITHER	184.8
Split-Dalmacija	IMOTSKI, Obrtničko-industrijska	SPL_Imo_Obr	OTHER	1999-07-25	2017-05-16	17.8097	17	RIČICE	SPLIT-DALMACIJA	1	NO	NO	NEITHER	186
Split-Dalmacija	IMOTSKI, Obrtničko-industrijska	SPL_Imo_Obr	OTHER	1999-06-24	2017-05-10	17.8782	17	ZMIJAVCI	SPLIT-DALMACIJA	1	NO	NO	NEITHER	184.4
Split-Dalmacija	IMOTSKI, Obrtničko-industrijska	SPL_Imo_Obr	OTHER	1999-06-22	2017-05-10	17.8836	17	ZMIJAVCI	SPLIT-DALMACIJA	1	NO	NO	NEITHER	179.8
Split-Dalmacija	IMOTSKI, Obrtničko-industrijska	SPL_Imo_Obr	OTHER	1999-05-31	2017-05-16	17.9603	17	DONJI PROLOŽAC	SPLIT-DALMACIJA	1	NO	NO	NEITHER	172.8
Split-Dalmacija	IMOTSKI, Obrtničko-industrijska	SPL_Imo_Obr	OTHER	1999-05-19	2017-05-10	17.9767	17	DONJI PROLOŽAC	SPLIT-DALMACIJA	1	NO	NO	NEITHER	178.8
Split-Dalmacija	IMOTSKI, Obrtničko-industrijska	SPL_Imo_Obr	OTHER	1999-04-06	2017-05-16	18.1109	18-20	IMOTSKI	SPLIT-DALMACIJA	2	NO	NO	NEITHER	190.5
Split-Dalmacija	IMOTSKI, Obrtničko-industrijska	SPL_Imo_Obr	OTHER	1999-02-19	2017-05-16	18.2368	18-20	DONJI PROLOŽAC	SPLIT-DALMACIJA	1	NO	NO	NEITHER	183.4
Split-Dalmacija	IMOTSKI, Obrtničko-industrijska	SPL_Imo_Obr	OTHER	1998-12-13	2017-05-16	18.423	18-20	GLAVINA DONJA	SPLIT-DALMACIJA	1	NO	NO	NEITHER	182.2
Split-Dalmacija	IMOTSKI, Tehnička škola	SPL_Imo_Teh	OTHER	1997-07-23	2016-02-29	18.6037	18-20	IMOTSKI	SPLIT-DALMACIJA	2	YES	YES	BOTH PARENTS	179.5
Split-Dalmacija	IMOTSKI, Tehnička škola	SPL_Imo_Teh	OTHER	1998-04-29	2016-02-29	17.8371	17	CISTA VELIKA	SPLIT-DALMACIJA	1	NO	NO	NEITHER	179.6
Split-Dalmacija	IMOTSKI, Tehnička škola	SPL_Imo_Teh	OTHER	1998-01-16	2016-02-29	18.1191	18-20	IMOTSKI	SPLIT-DALMACIJA	2	NO	NO	NEITHER	204.5
Split-Dalmacija	IMOTSKI, Tehnička škola	SPL_Imo_Teh	OTHER	1997-12-09	2016-02-29	18.2231	18-20	POLJICA	SPLIT-DALMACIJA	1	NO	NO	NEITHER	189.2
Split-Dalmacija	IMOTSKI, Tehnička škola	SPL_Imo_Teh	OTHER	1997-11-15	2016-02-29	18.2888	18-20	IMOTSKI	SPLIT-DALMACIJA	2	NO	NO	NEITHER	185.6
Split-Dalmacija	IMOTSKI, Tehnička škola	SPL_Imo_Teh	OTHER	1997-11-09	2016-02-29	18.3053	18-20	IMOTSKI	SPLIT-DALMACIJA	2	NO	NO	NEITHER	165.8
Split-Dalmacija	IMOTSKI, Tehnička škola	SPL_Imo_Teh	OTHER	1997-10-21	2016-02-29	18.3573	18-20	DONJI PROLOŽAC	SPLIT-DALMACIJA	1	NO	NO	NEITHER	186.3
Split-Dalmacija	IMOTSKI, Tehnička škola	SPL_Imo_Teh	OTHER	1997-09-18	2016-02-29	18.4476	18-20	IMOTSKI	SPLIT-DALMACIJA	2	NO	NO	NEITHER	180.4
Split-Dalmacija	IMOTSKI, Tehnička škola	SPL_Imo_Teh	OTHER	1997-08-27	2016-02-29	18.5079	18-20	SPLIT	SPLIT-DALMACIJA	3	NO	NO	NEITHER	192.5
Split-Dalmacija	IMOTSKI, Tehnička škola	SPL_Imo_Teh	OTHER	1997-07-19	2016-02-29	18.6146	18-20	VIR	ZADAR	1	NO	NO	NEITHER	193
Split-Dalmacija	IMOTSKI, Tehnička škola	SPL_Imo_Teh	OTHER	1997-06-30	2016-02-29	18.6667	18-20	JESENICE	SPLIT-DALMACIJA	1	NO	NO	NEITHER	178.4
Split-Dalmacija	IMOTSKI, Tehnička škola	SPL_Imo_Teh	OTHER	1997-06-07	2016-02-29	18.7296	18-20	ZMIJAVCI	SPLIT-DALMACIJA	1	NO	NO	NEITHER	185
Split-Dalmacija	IMOTSKI, Tehnička škola	SPL_Imo_Teh	OTHER	1997-05-27	2016-02-29	18.7598	18-20	IMOTSKI	SPLIT-DALMACIJA	2	NO	NO	NEITHER	190.9
Split-Dalmacija	IMOTSKI, Tehnička škola	SPL_Imo_Teh	OTHER	1997-05-12	2016-02-29	18.8008	18-20	RUMOVIĆ	SPLIT-DALMACIJA	1	NO	NO	NEITHER	179.9
Split-Dalmacija	IMOTSKI, Tehnička škola	SPL_Imo_Teh	OTHER	1997-05-06	2016-02-29	18.8172	18-20	GLAVINA DONJA	SPLIT-DALMACIJA	1	NO	NO	NEITHER	178.1
Split-Dalmacija	IMOTSKI, Tehnička škola	SPL_Imo_Teh	OTHER	1997-04-12	2016-02-29	18.883	18-20	IMOTSKI	SPLIT-DALMACIJA	2	NO	NO	NEITHER	179.2
Split-Dalmacija	IMOTSKI, Tehnička škola	SPL_Imo_Teh	OTHER	1997-02-05	2016-02-29	19.0637	18-20	VINJANI GORNJI	SPLIT-DALMACIJA	1	NO	NO	NEITHER	177
Split-Dalmacija	IMOTSKI, Tehnička škola	SPL_Imo_Teh	OTHER	1996-07-10	2016-02-29	19.6386	18-20	SPLIT	SPLIT-DALMACIJA	3	NO	NO	NEITHER	179.3
Split-Dalmacija	IMOTSKI, Tehnička škola	SPL_Imo_Teh	OTHER	1998-01-19	2016-02-29	18.1109	18-20	ZMIJAVCI	SPLIT-DALMACIJA	1	YES	NO	ONE PARENT	192.8
Split-Dalmacija	IMOTSKI, Tehnička škola	SPL_Imo_Teh	OTHER	1997-12-18	2016-02-29	18.1985	18-20	DONJI PROLOŽAC	SPLIT-DALMACIJA	1	YES	NO	ONE PARENT	185.9
Split-Dalmacija	IMOTSKI, Tehnička škola	SPL_Imo_Teh	OTHER	1997-03-06	2016-02-29	18.9843	18-20	LOVREĆ	SPLIT-DALMACIJA	1	NO	YES	ONE PARENT	184.5
Split-Dalmacija	MAKARSKA, Srednja strukovna	SPL_Mak_Struk	OTHER	1999-10-29	2017-05-11	17.5332	17	IGRANE	SPLIT-DALMACIJA	1	YES	YES	BOTH PARENTS	188.7
Split-Dalmacija	MAKARSKA, Srednja strukovna	SPL_Mak_Struk	OTHER	1999-07-01	2017-05-11	17.8617	17	MAKARSKA	SPLIT-DALMACIJA	2	YES	YES	BOTH PARENTS	200.7
Split-Dalmacija	MAKARSKA, Srednja strukovna	SPL_Mak_Struk	OTHER	1998-09-09	2017-05-11	18.6694	18-20	IMOTSKI	SPLIT-DALMACIJA	2	YES	YES	BOTH PARENTS	183.3
Split-Dalmacija	MAKARSKA, Srednja strukovna	SPL_Mak_Struk	OTHER	1999-10-07	2017-05-11	17.5934	17	MAKARSKA	SPLIT-DALMACIJA	2	NO	NO	NEITHER	180.8
Split-Dalmacija	MAKARSKA, Srednja strukovna	SPL_Mak_Struk	OTHER	1999-08-31	2017-05-11	17.6947	17	MAKARSKA	SPLIT-DALMACIJA	2	NO	NO	NEITHER	189.9
Split-Dalmacija	MAKARSKA, Srednja strukovna	SPL_Mak_Struk	OTHER	1999-06-16	2017-05-11	17.9028	17	MAKARSKA	SPLIT-DALMACIJA	2	NO	NO	NEITHER	186.9
Split-Dalmacija	MAKARSKA, Srednja strukovna	SPL_Mak_Struk	OTHER	1999-06-13	2017-05-11	17.911	17	BRELA	SPLIT-DALMACIJA	1	NO	NO	NEITHER	183
Split-Dalmacija	MAKARSKA, Srednja strukovna	SPL_Mak_Struk	OTHER	1999-05-12	2017-05-11	17.9986	18-20	IGRANE	SPLIT-DALMACIJA	1	NO	NO	NEITHER	182.6
Split-Dalmacija	MAKARSKA, Srednja strukovna	SPL_Mak_Struk	OTHER	1999-03-02	2017-05-11	18.193	18-20	MAKARSKA	SPLIT-DALMACIJA	2	NO	NO	NEITHER	185.3
Split-Dalmacija	MAKARSKA, Srednja strukovna	SPL_Mak_Struk	OTHER	1999-03-02	2017-05-11	18.193	18-20	MAKARSKA	SPLIT-DALMACIJA	2	NO	NO	NEITHER	188
Split-Dalmacija	MAKARSKA, Srednja strukovna	SPL_Mak_Struk	OTHER	1999-01-24	2017-05-11	18.2943	18-20	MAKARSKA	SPLIT-DALMACIJA	2	NO	NO	NEITHER	176.9
Split-Dalmacija	MAKARSKA, Srednja strukovna	SPL_Mak_Struk	OTHER	1998-12-20	2017-05-11	18.3901	18-20	MAKARSKA	SPLIT-DALMACIJA	2	NO	NO	NEITHER	185.2
Split-Dalmacija	MAKARSKA, Srednja strukovna	SPL_Mak_Struk	OTHER	1998-12-17	2017-05-11	18.3984	18-20	KRVAVICA	SPLIT-DALMACIJA	1	NO	NO	NEITHER	177.2
Split-Dalmacija	MAKARSKA, Srednja strukovna	SPL_Mak_Struk	OTHER	1998-11-02	2017-05-11	18.5216	18-20	MAKARSKA	SPLIT-DALMACIJA	2	NO	NO	NEITHER	190.7
Split-Dalmacija	MAKARSKA, Srednja strukovna	SPL_Mak_Struk	OTHER	1998-07-13	2017-05-11	18.8282	18-20	BRELA	SPLIT-DALMACIJA	1	NO	NO	NEITHER	188.5
Split-Dalmacija	MAKARSKA, Srednja strukovna	SPL_Mak_Struk	OTHER	1998-07-09	2017-05-11	18.8392	18-20	MAKARSKA	SPLIT-DALMACIJA	2	NO	NO	NEITHER	177.7
Split-Dalmacija	MAKARSKA, Srednja strukovna	SPL_Mak_Struk	OTHER	1998-01-07	2017-05-11	19.3402	18-20	RAŠĆANE	SPLIT-DALMACIJA	1	NO	NO	NEITHER	174.2
Split-Dalmacija	MAKARSKA, Srednja strukovna	SPL_Mak_Struk	OTHER	1999-02-22	2017-05-11	18.2149	18-20	PODGORA	SPLIT-DALMACIJA	1	NO	YES	ONE PARENT	186.4
Split-Dalmacija	MAKARSKA, Srednja škola fra A. K. Miošića	SPL_Mak_SredAKM	MIXED	1998-03-07	2016-05-04	18.1602	18-20	MAKARSKA	SPLIT-DALMACIJA	2	YES	YES	BOTH PARENTS	200.6
Split-Dalmacija	MAKARSKA, Srednja škola fra A. K. Miošića	SPL_Mak_SredAKM	MIXED	1997-12-15	2016-05-04	18.3847	18-20	MAKARSKA	SPLIT-DALMACIJA	2	YES	YES	BOTH PARENTS	182.8
Split-Dalmacija	MAKARSKA, Srednja škola fra A. K. Miošića	SPL_Mak_SredAKM	MIXED	1997-11-26	2016-05-04	18.4367	18-20	MAKARSKA	SPLIT-DALMACIJA	2	YES	YES	BOTH PARENTS	186.5
Split-Dalmacija	MAKARSKA, Srednja škola fra A. K. Miošića	SPL_Mak_SredAKM	MIXED	1997-11-08	2016-05-04	18.486	18-20	MAKARSKA	SPLIT-DALMACIJA	2	YES	YES	BOTH PARENTS	196.2
Split-Dalmacija	MAKARSKA, Srednja škola fra A. K. Miošića	SPL_Mak_SredAKM	MIXED	1997-06-10	2016-05-04	18.8994	18-20	TUČEPI	SPLIT-DALMACIJA	1	YES	YES	BOTH PARENTS	169
Split-Dalmacija	MAKARSKA, Srednja škola fra A. K. Miošića	SPL_Mak_SredAKM	MIXED	1997-05-01	2016-05-04	19.0089	18-20	MAKARSKA	SPLIT-DALMACIJA	2	YES	YES	BOTH PARENTS	185.2
Split-Dalmacija	MAKARSKA, Srednja škola fra A. K. Miošića	SPL_Mak_SredAKM	MIXED	1997-04-18	2016-05-04	19.0445	18-20	MAKARSKA	SPLIT-DALMACIJA	2	YES	YES	BOTH PARENTS	185.6
Split-Dalmacija	MAKARSKA, Srednja škola fra A. K. Miošića	SPL_Mak_SredAKM	MIXED	1998-01-24	2016-05-04	18.2752	18-20	TUČEPI	SPLIT-DALMACIJA	1	NO	NO	NEITHER	184.6
Split-Dalmacija	MAKARSKA, Srednja škola fra A. K. Miošića	SPL_Mak_SredAKM	MIXED	1998-01-13	2016-05-04	18.3053	18-20	TUČEPI	SPLIT-DALMACIJA	1	NO	NO	NEITHER	176.1
Split-Dalmacija	MAKARSKA, Srednja škola fra A. K. Miošića	SPL_Mak_SredAKM	MIXED	1998-01-04	2016-05-04	18.3299	18-20	TUČEPI	SPLIT-DALMACIJA	1	NO	NO	NEITHER	169.6
Split-Dalmacija	MAKARSKA, Srednja škola fra A. K. Miošića	SPL_Mak_SredAKM	MIXED	1997-12-09	2016-05-04	18.4011	18-20	TUČEPI	SPLIT-DALMACIJA	1	NO	NO	NEITHER	186.9
Split-Dalmacija	MAKARSKA, Srednja škola fra A. K. Miošića	SPL_Mak_SredAKM	MIXED	1997-11-12	2016-05-04	18.475	18-20	BRELA	SPLIT-DALMACIJA	1	NO	NO	NEITHER	177.5
Split-Dalmacija	MAKARSKA, Srednja škola fra A. K. Miošića	SPL_Mak_SredAKM	MIXED	1997-10-10	2016-05-04	18.5654	18-20	TUČEPI	SPLIT-DALMACIJA	1	NO	NO	NEITHER	183.8
Split-Dalmacija	MAKARSKA, Srednja škola fra A. K. Miošića	SPL_Mak_SredAKM	MIXED	1997-10-08	2016-05-04	18.5708	18-20	MAKARSKA	SPLIT-DALMACIJA	2	NO	NO	NEITHER	196.1
Split-Dalmacija	MAKARSKA, Srednja škola fra A. K. Miošića	SPL_Mak_SredAKM	MIXED	1997-10-07	2016-05-04	18.5736	18-20	MAKARSKA	SPLIT-DALMACIJA	2	NO	NO	NEITHER	183.7
Split-Dalmacija	MAKARSKA, Srednja škola fra A. K. Miošića	SPL_Mak_SredAKM	MIXED	1997-08-24	2016-05-04	18.694	18-20	MAKARSKA	SPLIT-DALMACIJA	2	NO	NO	NEITHER	186.5
Split-Dalmacija	MAKARSKA, Srednja škola fra A. K. Miošića	SPL_Mak_SredAKM	MIXED	1997-07-08	2016-05-04	18.8227	18-20	PODGORA	SPLIT-DALMACIJA	1	NO	NO	NEITHER	179
Split-Dalmacija	MAKARSKA, Srednja škola fra A. K. Miošića	SPL_Mak_SredAKM	MIXED	1997-06-13	2016-05-04	18.8912	18-20	BAŠKA VODA	SPLIT-DALMACIJA	1	NO	NO	NEITHER	181.9
Split-Dalmacija	MAKARSKA, Srednja škola fra A. K. Miošića	SPL_Mak_SredAKM	MIXED	1997-05-12	2016-05-04	18.9788	18-20	MAKARSKA	SPLIT-DALMACIJA	2	NO	NO	NEITHER	190.5
Split-Dalmacija	MAKARSKA, Srednja škola fra A. K. Miošića	SPL_Mak_SredAKM	MIXED	1997-04-28	2016-05-04	19.0171	18-20	MAKARSKA	SPLIT-DALMACIJA	2	NO	NO	NEITHER	190.1
Split-Dalmacija	MAKARSKA, Srednja škola fra A. K. Miošića	SPL_Mak_SredAKM	MIXED	1997-04-23	2016-05-04	19.0308	18-20	MAKARSKA	SPLIT-DALMACIJA	2	NO	NO	NEITHER	189.5
Split-Dalmacija	MAKARSKA, Srednja škola fra A. K. Miošića	SPL_Mak_SredAKM	MIXED	1998-03-30	2016-05-04	18.0972	18-20	IGRANE	SPLIT-DALMACIJA	1	YES	NO	ONE PARENT	179.8
Split-Dalmacija	MAKARSKA, Srednja škola fra A. K. Miošića	SPL_Mak_SredAKM	MIXED	1998-02-05	2016-05-04	18.2423	18-20	MAKARSKA	SPLIT-DALMACIJA	2	YES	NO	ONE PARENT	182.5
Split-Dalmacija	MAKARSKA, Srednja škola fra A. K. Miošića	SPL_Mak_SredAKM	MIXED	1997-12-14	2016-05-04	18.3874	18-20	IGRANE	SPLIT-DALMACIJA	1	NO	YES	ONE PARENT	188.3
Split-Dalmacija	MAKARSKA, Srednja škola fra A. K. Miošića	SPL_Mak_SredAKM	MIXED	1997-07-09	2016-05-04	18.82	18-20	MAKARSKA	SPLIT-DALMACIJA	2	YES	NO	ONE PARENT	179.3
Split-Dalmacija	MAKARSKA, Srednja škola fra A. K. Miošića	SPL_Mak_SredAKM	MIXED	1997-06-26	2016-05-04	18.8556	18-20	MAKARSKA	SPLIT-DALMACIJA	2	NO	YES	ONE PARENT	186.5
Split-Dalmacija	MAKARSKA, Srednja škola fra A. K. Miošića	SPL_Mak_SredAKM	MIXED	1997-06-23	2016-05-04	18.8638	18-20	MAKARSKA	SPLIT-DALMACIJA	2	YES	NO	ONE PARENT	184.6
Split-Dalmacija	MAKARSKA, Srednja škola fra A. K. Miošića	SPL_Mak_SredAKM	MIXED	1997-06-03	2016-05-04	18.9185	18-20	PODGORA	SPLIT-DALMACIJA	1	YES	NO	ONE PARENT	179.4
Split-Dalmacija	SINJ, Srednja strukovna bana J. Jelačića	SPL_Sinj_Struk	OTHER	1999-01-17	2017-02-09	18.0643	18-20	SINJ	SPLIT-DALMACIJA	2	YES	YES	BOTH PARENTS	196
Split-Dalmacija	SINJ, Srednja strukovna bana J. Jelačića	SPL_Sinj_Struk	OTHER	1998-03-12	2017-02-09	18.9158	18-20	ZELOVO	SPLIT-DALMACIJA	1	YES	YES	BOTH PARENTS	183.5
Split-Dalmacija	SINJ, Srednja strukovna bana J. Jelačića	SPL_Sinj_Struk	OTHER	1999-07-02	2017-02-09	17.6099	17	SINJ	SPLIT-DALMACIJA	2	NO	NO	NEITHER	183
Split-Dalmacija	SINJ, Srednja strukovna bana J. Jelačića	SPL_Sinj_Struk	OTHER	1999-04-21	2017-02-09	17.807	17	GLAVICE	SPLIT-DALMACIJA	1	NO	NO	NEITHER	188.5
Split-Dalmacija	SINJ, Srednja strukovna bana J. Jelačića	SPL_Sinj_Struk	OTHER	1999-04-02	2017-02-09	17.859	17	SINJ	SPLIT-DALMACIJA	2	NO	NO	NEITHER	189.5
Split-Dalmacija	SINJ, Srednja strukovna bana J. Jelačića	SPL_Sinj_Struk	OTHER	1999-04-01	2017-02-09	17.8617	17	SUHAČ	SPLIT-DALMACIJA	1	NO	NO	NEITHER	190.7
Split-Dalmacija	SINJ, Srednja strukovna bana J. Jelačića	SPL_Sinj_Struk	OTHER	1999-03-11	2017-02-09	17.9192	17	TRILJ	SPLIT-DALMACIJA	1	NO	NO	NEITHER	173.9
Split-Dalmacija	SINJ, Srednja strukovna bana J. Jelačića	SPL_Sinj_Struk	OTHER	1999-02-05	2017-02-09	18.0123	18-20	ČAPORICE	SPLIT-DALMACIJA	1	NO	NO	NEITHER	181.9
Split-Dalmacija	SINJ, Srednja strukovna bana J. Jelačića	SPL_Sinj_Struk	OTHER	1999-01-23	2017-02-09	18.0479	18-20	BRNAZE	SPLIT-DALMACIJA	1	NO	NO	NEITHER	185.5
Split-Dalmacija	SINJ, Srednja strukovna bana J. Jelačića	SPL_Sinj_Struk	OTHER	1998-11-10	2017-02-09	18.2505	18-20	SINJ	SPLIT-DALMACIJA	2	NO	NO	NEITHER	181
Split-Dalmacija	SINJ, Srednja strukovna bana J. Jelačića	SPL_Sinj_Struk	OTHER	1998-10-24	2017-02-09	18.2971	18-20	SINJ	SPLIT-DALMACIJA	2	NO	NO	NEITHER	188.2
Split-Dalmacija	SINJ, Srednja strukovna bana J. Jelačića	SPL_Sinj_Struk	OTHER	1998-10-04	2017-02-09	18.3518	18-20	SINJ	SPLIT-DALMACIJA	2	NO	NO	NEITHER	180.6
Split-Dalmacija	SINJ, Srednja strukovna bana J. Jelačića	SPL_Sinj_Struk	OTHER	1998-09-30	2017-02-09	18.3628	18-20	BRNAZE	SPLIT-DALMACIJA	1	NO	NO	NEITHER	182.5
Split-Dalmacija	SINJ, Srednja strukovna bana J. Jelačića	SPL_Sinj_Struk	OTHER	1998-09-16	2017-02-09	18.4011	18-20	SINJ	SPLIT-DALMACIJA	2	NO	NO	NEITHER	175
Split-Dalmacija	SINJ, Srednja strukovna bana J. Jelačića	SPL_Sinj_Struk	OTHER	1998-07-07	2017-02-09	18.5955	18-20	SINJ	SPLIT-DALMACIJA	2	NO	NO	NEITHER	179.5
Split-Dalmacija	SINJ, Srednja strukovna bana J. Jelačića	SPL_Sinj_Struk	OTHER	1998-06-26	2017-02-09	18.6256	18-20	SINJ	SPLIT-DALMACIJA	2	NO	NO	NEITHER	194
Split-Dalmacija	SINJ, Srednja strukovna bana J. Jelačića	SPL_Sinj_Struk	OTHER	1998-05-29	2017-02-09	18.7023	18-20	VEDRINE	SPLIT-DALMACIJA	1	NO	NO	NEITHER	187.1
Split-Dalmacija	SINJ, Srednja strukovna bana J. Jelačića	SPL_Sinj_Struk	OTHER	1998-05-25	2017-02-09	18.7132	18-20	KOŠUTE	SPLIT-DALMACIJA	1	NO	NO	NEITHER	177.3
Split-Dalmacija	SINJ, Srednja strukovna bana J. Jelačića	SPL_Sinj_Struk	OTHER	1997-10-13	2017-02-09	19.3265	18-20	TRILJ	SPLIT-DALMACIJA	1	NO	NO	NEITHER	177.5
Split-Dalmacija	SINJ, Srednja strukovna bana J. Jelačića	SPL_Sinj_Struk	OTHER	1999-03-28	2017-02-09	17.8727	17	HRVACE	SPLIT-DALMACIJA	1	YES	NO	ONE PARENT	182
Split-Dalmacija	SINJ, Srednja strukovna bana J. Jelačića	SPL_Sinj_Struk	OTHER	1998-07-10	2017-02-09	18.5873	18-20	SINJ	SPLIT-DALMACIJA	2	NO	YES	ONE PARENT	176.8
Split-Dalmacija	SINJ, Srednja strukovna bana J. Jelačića	SPL_Sinj_Struk	OTHER	1998-02-05	2017-02-09	19.0116	18-20	BRNAZE	SPLIT-DALMACIJA	1	YES	NO	ONE PARENT	174.6
Split-Dalmacija	SINJ, Tehnička i industrijska R. Boškovića	SPL_Sinj_Teh	OTHER	1999-04-28	2017-02-09	17.7878	17	TRILJ	SPLIT-DALMACIJA	1	unavailable	unavailable	unavailable	165
Split-Dalmacija	SINJ, Tehnička i industrijska R. Boškovića	SPL_Sinj_Teh	OTHER	1999-04-25	2017-02-09	17.796	17	GLAVICE	SPLIT-DALMACIJA	1	unavailable	unavailable	unavailable	197.5
Split-Dalmacija	SINJ, Tehnička i industrijska R. Boškovića	SPL_Sinj_Teh	OTHER	1999-03-31	2017-02-09	17.8645	17	PODI	SPLIT-DALMACIJA	1	unavailable	unavailable	unavailable	188.7
Split-Dalmacija	SINJ, Tehnička i industrijska R. Boškovića	SPL_Sinj_Teh	OTHER	1999-03-14	2017-02-09	17.911	17	SINJ	SPLIT-DALMACIJA	2	unavailable	unavailable	unavailable	177
Split-Dalmacija	SINJ, Tehnička i industrijska R. Boškovića	SPL_Sinj_Teh	OTHER	1999-03-11	2017-02-09	17.9192	17	VRLIKA	SPLIT-DALMACIJA	1	unavailable	unavailable	unavailable	186.5
Split-Dalmacija	SINJ, Tehnička i industrijska R. Boškovića	SPL_Sinj_Teh	OTHER	1999-02-28	2017-02-09	17.9493	17	SINJ	SPLIT-DALMACIJA	2	unavailable	unavailable	unavailable	185.6
Split-Dalmacija	SINJ, Tehnička i industrijska R. Boškovića	SPL_Sinj_Teh	OTHER	1999-02-15	2017-02-09	17.9849	17	SINJ	SPLIT-DALMACIJA	2	unavailable	unavailable	unavailable	170.3
Split-Dalmacija	SINJ, Tehnička i industrijska R. Boškovića	SPL_Sinj_Teh	OTHER	1999-02-13	2017-02-09	17.9904	17	SINJ	SPLIT-DALMACIJA	2	unavailable	unavailable	unavailable	183.5
Split-Dalmacija	SINJ, Tehnička i industrijska R. Boškovića	SPL_Sinj_Teh	OTHER	1999-02-13	2017-02-09	17.9904	17	SINJ	SPLIT-DALMACIJA	2	unavailable	unavailable	unavailable	168.8
Split-Dalmacija	SINJ, Tehnička i industrijska R. Boškovića	SPL_Sinj_Teh	OTHER	1999-02-07	2017-02-09	18.0068	18-20	SINJ	SPLIT-DALMACIJA	2	unavailable	unavailable	unavailable	174.7
Split-Dalmacija	SINJ, Tehnička i industrijska R. Boškovića	SPL_Sinj_Teh	OTHER	1999-02-06	2017-02-09	18.0096	18-20	SINJ	SPLIT-DALMACIJA	2	unavailable	unavailable	unavailable	183.5
Split-Dalmacija	SINJ, Tehnička i industrijska R. Boškovića	SPL_Sinj_Teh	OTHER	1999-02-04	2017-02-09	18.0151	18-20	TURJACI	SPLIT-DALMACIJA	1	unavailable	unavailable	unavailable	188.8
Split-Dalmacija	SINJ, Tehnička i industrijska R. Boškovića	SPL_Sinj_Teh	OTHER	1999-01-10	2017-02-09	18.0835	18-20	SINJ	SPLIT-DALMACIJA	2	unavailable	unavailable	unavailable	176
Split-Dalmacija	SINJ, Tehnička i industrijska R. Boškovića	SPL_Sinj_Teh	OTHER	1999-01-04	2017-02-09	18.0999	18-20	HRVACE	SPLIT-DALMACIJA	1	unavailable	unavailable	unavailable	187.7
Split-Dalmacija	SINJ, Tehnička i industrijska R. Boškovića	SPL_Sinj_Teh	OTHER	1998-12-29	2017-02-09	18.1164	18-20	VRLIKA	SPLIT-DALMACIJA	1	unavailable	unavailable	unavailable	178.6
Split-Dalmacija	SINJ, Tehnička i industrijska R. Boškovića	SPL_Sinj_Teh	OTHER	1998-12-25	2017-02-09	18.1273	18-20	SINJ	SPLIT-DALMACIJA	2	unavailable	unavailable	unavailable	192
Split-Dalmacija	SINJ, Tehnička i industrijska R. Boškovića	SPL_Sinj_Teh	OTHER	1998-12-24	2017-02-09	18.13	18-20	BRNAZE	SPLIT-DALMACIJA	1	unavailable	unavailable	unavailable	186.5
Split-Dalmacija	SINJ, Tehnička i industrijska R. Boškovića	SPL_Sinj_Teh	OTHER	1998-12-16	2017-02-09	18.152	18-20	TRILJ	SPLIT-DALMACIJA	1	unavailable	unavailable	unavailable	189.5
Split-Dalmacija	SINJ, Tehnička i industrijska R. Boškovića	SPL_Sinj_Teh	OTHER	1998-12-09	2017-02-09	18.1711	18-20	ČITLUK	SPLIT-DALMACIJA	1	unavailable	unavailable	unavailable	186.4
Split-Dalmacija	SINJ, Tehnička i industrijska R. Boškovića	SPL_Sinj_Teh	OTHER	1998-12-05	2017-02-09	18.1821	18-20	GLAVICE	SPLIT-DALMACIJA	1	unavailable	unavailable	unavailable	176.6
Split-Dalmacija	SINJ, Tehnička i industrijska R. Boškovića	SPL_Sinj_Teh	OTHER	1998-12-02	2017-02-09	18.1903	18-20	ČITLUK	SPLIT-DALMACIJA	1	unavailable	unavailable	unavailable	183.5
Split-Dalmacija	SINJ, Tehnička i industrijska R. Boškovića	SPL_Sinj_Teh	OTHER	1998-11-09	2017-02-09	18.2533	18-20	TRILJ	SPLIT-DALMACIJA	1	unavailable	unavailable	unavailable	179.6
Split-Dalmacija	SINJ, Tehnička i industrijska R. Boškovića	SPL_Sinj_Teh	OTHER	1998-11-04	2017-02-09	18.2669	18-20	SINJ	SPLIT-DALMACIJA	2	unavailable	unavailable	unavailable	191.8
Split-Dalmacija	SINJ, Tehnička i industrijska R. Boškovića	SPL_Sinj_Teh	OTHER	1998-11-02	2017-02-09	18.2724	18-20	POTRAVLJE	SPLIT-DALMACIJA	1	unavailable	unavailable	unavailable	183
Split-Dalmacija	SINJ, Tehnička i industrijska R. Boškovića	SPL_Sinj_Teh	OTHER	1998-10-20	2017-02-09	18.308	18-20	TRILJ	SPLIT-DALMACIJA	1	unavailable	unavailable	unavailable	189.2
Split-Dalmacija	SINJ, Tehnička i industrijska R. Boškovića	SPL_Sinj_Teh	OTHER	1998-10-18	2017-02-09	18.3135	18-20	KOŠUTE	SPLIT-DALMACIJA	1	unavailable	unavailable	unavailable	179.5
Split-Dalmacija	SINJ, Tehnička i industrijska R. Boškovića	SPL_Sinj_Teh	OTHER	1998-10-16	2017-02-09	18.319	18-20	SINJ	SPLIT-DALMACIJA	2	unavailable	unavailable	unavailable	197.5
Split-Dalmacija	SINJ, Tehnička i industrijska R. Boškovića	SPL_Sinj_Teh	OTHER	1998-10-05	2017-02-09	18.3491	18-20	VRPOLJE	ŠIBENIK-KNIN	1	unavailable	unavailable	unavailable	187.5
Split-Dalmacija	SINJ, Tehnička i industrijska R. Boškovića	SPL_Sinj_Teh	OTHER	1998-10-04	2017-02-09	18.3518	18-20	SINJ	SPLIT-DALMACIJA	2	unavailable	unavailable	unavailable	180.9
Split-Dalmacija	SINJ, Tehnička i industrijska R. Boškovića	SPL_Sinj_Teh	OTHER	1998-10-03	2017-02-09	18.3546	18-20	GLAVICE	SPLIT-DALMACIJA	1	unavailable	unavailable	unavailable	191.6
Split-Dalmacija	SINJ, Tehnička i industrijska R. Boškovića	SPL_Sinj_Teh	OTHER	1998-10-02	2017-02-09	18.3573	18-20	GLAVICE	SPLIT-DALMACIJA	1	unavailable	unavailable	unavailable	186.5
Split-Dalmacija	SINJ, Tehnička i industrijska R. Boškovića	SPL_Sinj_Teh	OTHER	1998-09-28	2017-02-09	18.3682	18-20	SINJ	SPLIT-DALMACIJA	2	unavailable	unavailable	unavailable	187.4
Split-Dalmacija	SINJ, Tehnička i industrijska R. Boškovića	SPL_Sinj_Teh	OTHER	1998-09-27	2017-02-09	18.371	18-20	SINJ	SPLIT-DALMACIJA	2	unavailable	unavailable	unavailable	187.1
Split-Dalmacija	SINJ, Tehnička i industrijska R. Boškovića	SPL_Sinj_Teh	OTHER	1998-09-24	2017-02-09	18.3792	18-20	TRILJ	SPLIT-DALMACIJA	1	unavailable	unavailable	unavailable	190
Split-Dalmacija	SINJ, Tehnička i industrijska R. Boškovića	SPL_Sinj_Teh	OTHER	1998-09-22	2017-02-09	18.3847	18-20	TRILJ	SPLIT-DALMACIJA	1	unavailable	unavailable	unavailable	174.2
Split-Dalmacija	SINJ, Tehnička i industrijska R. Boškovića	SPL_Sinj_Teh	OTHER	1998-09-19	2017-02-09	18.3929	18-20	GLAVICE	SPLIT-DALMACIJA	1	unavailable	unavailable	unavailable	188.8
Split-Dalmacija	SINJ, Tehnička i industrijska R. Boškovića	SPL_Sinj_Teh	OTHER	1998-09-16	2017-02-09	18.4011	18-20	GLAVICE	SPLIT-DALMACIJA	1	unavailable	unavailable	unavailable	183
Split-Dalmacija	SINJ, Tehnička i industrijska R. Boškovića	SPL_Sinj_Teh	OTHER	1998-09-15	2017-02-09	18.4038	18-20	GLAVICE	SPLIT-DALMACIJA	1	unavailable	unavailable	unavailable	186.7
Split-Dalmacija	SINJ, Tehnička i industrijska R. Boškovića	SPL_Sinj_Teh	OTHER	1998-09-10	2017-02-09	18.4175	18-20	ZELOVO	SPLIT-DALMACIJA	1	unavailable	unavailable	unavailable	187
Split-Dalmacija	SINJ, Tehnička i industrijska R. Boškovića	SPL_Sinj_Teh	OTHER	1998-09-07	2017-02-09	18.4257	18-20	SINJ	SPLIT-DALMACIJA	2	unavailable	unavailable	unavailable	187.4
Split-Dalmacija	SINJ, Tehnička i industrijska R. Boškovića	SPL_Sinj_Teh	OTHER	1998-09-01	2017-02-09	18.4422	18-20	SINJ	SPLIT-DALMACIJA	2	unavailable	unavailable	unavailable	186.8
Split-Dalmacija	SINJ, Tehnička i industrijska R. Boškovića	SPL_Sinj_Teh	OTHER	1998-08-30	2017-02-09	18.4476	18-20	SINJ	SPLIT-DALMACIJA	2	unavailable	unavailable	unavailable	186.2
Split-Dalmacija	SINJ, Tehnička i industrijska R. Boškovića	SPL_Sinj_Teh	OTHER	1998-08-29	2017-02-09	18.4504	18-20	SINJ	SPLIT-DALMACIJA	2	unavailable	unavailable	unavailable	181.5
Split-Dalmacija	SINJ, Tehnička i industrijska R. Boškovića	SPL_Sinj_Teh	OTHER	1998-08-18	2017-02-09	18.4805	18-20	ČAPORICE	SPLIT-DALMACIJA	1	unavailable	unavailable	unavailable	190.9
Split-Dalmacija	SINJ, Tehnička i industrijska R. Boškovića	SPL_Sinj_Teh	OTHER	1998-08-17	2017-02-09	18.4832	18-20	TURJACI	SPLIT-DALMACIJA	1	unavailable	unavailable	unavailable	188.3
Split-Dalmacija	SINJ, Tehnička i industrijska R. Boškovića	SPL_Sinj_Teh	OTHER	1998-08-05	2017-02-09	18.5161	18-20	SINJ	SPLIT-DALMACIJA	2	unavailable	unavailable	unavailable	189
Split-Dalmacija	SINJ, Tehnička i industrijska R. Boškovića	SPL_Sinj_Teh	OTHER	1998-07-28	2017-02-09	18.538	18-20	OTOK	SPLIT-DALMACIJA	1	unavailable	unavailable	unavailable	185.3
Split-Dalmacija	SINJ, Tehnička i industrijska R. Boškovića	SPL_Sinj_Teh	OTHER	1998-07-23	2017-02-09	18.5517	18-20	OTOK	SPLIT-DALMACIJA	1	unavailable	unavailable	unavailable	190.8
Split-Dalmacija	SINJ, Tehnička i industrijska R. Boškovića	SPL_Sinj_Teh	OTHER	1998-07-20	2017-02-09	18.5599	18-20	VEDRINE	SPLIT-DALMACIJA	1	unavailable	unavailable	unavailable	192
Split-Dalmacija	SINJ, Tehnička i industrijska R. Boškovića	SPL_Sinj_Teh	OTHER	1998-07-12	2017-02-09	18.5818	18-20	VEDRINE	SPLIT-DALMACIJA	1	unavailable	unavailable	unavailable	180.2
Split-Dalmacija	SINJ, Tehnička i industrijska R. Boškovića	SPL_Sinj_Teh	OTHER	1998-07-05	2017-02-09	18.601	18-20	OTOK	SPLIT-DALMACIJA	1	unavailable	unavailable	unavailable	193.1
Split-Dalmacija	SINJ, Tehnička i industrijska R. Boškovića	SPL_Sinj_Teh	OTHER	1998-07-01	2017-02-09	18.6119	18-20	VEDRINE	SPLIT-DALMACIJA	1	unavailable	unavailable	unavailable	174.3
Split-Dalmacija	SINJ, Tehnička i industrijska R. Boškovića	SPL_Sinj_Teh	OTHER	1998-06-29	2017-02-09	18.6174	18-20	VELIĆ	SPLIT-DALMACIJA	1	unavailable	unavailable	unavailable	190.5
Split-Dalmacija	SINJ, Tehnička i industrijska R. Boškovića	SPL_Sinj_Teh	OTHER	1998-06-29	2017-02-09	18.6174	18-20	OTOK	SPLIT-DALMACIJA	1	unavailable	unavailable	unavailable	188.5
Split-Dalmacija	SINJ, Tehnička i industrijska R. Boškovića	SPL_Sinj_Teh	OTHER	1998-06-10	2017-02-09	18.6694	18-20	OTOK	SPLIT-DALMACIJA	1	unavailable	unavailable	unavailable	204.5
Split-Dalmacija	SINJ, Tehnička i industrijska R. Boškovića	SPL_Sinj_Teh	OTHER	1998-06-10	2017-02-09	18.6694	18-20	SINJ	SPLIT-DALMACIJA	2	unavailable	unavailable	unavailable	171.1
Split-Dalmacija	SINJ, Tehnička i industrijska R. Boškovića	SPL_Sinj_Teh	OTHER	1998-05-19	2017-02-09	18.7296	18-20	SINJ	SPLIT-DALMACIJA	2	unavailable	unavailable	unavailable	177.6
Split-Dalmacija	SINJ, Tehnička i industrijska R. Boškovića	SPL_Sinj_Teh	OTHER	1998-05-06	2017-02-09	18.7652	18-20	VRLIKA	SPLIT-DALMACIJA	1	unavailable	unavailable	unavailable	185.4
Split-Dalmacija	SINJ, Tehnička i industrijska R. Boškovića	SPL_Sinj_Teh	OTHER	1998-04-18	2017-02-09	18.8145	18-20	SINJ	SPLIT-DALMACIJA	2	unavailable	unavailable	unavailable	202.5
Split-Dalmacija	SINJ, Tehnička i industrijska R. Boškovića	SPL_Sinj_Teh	OTHER	1998-04-01	2017-02-09	18.8611	18-20	GALA	SPLIT-DALMACIJA	1	unavailable	unavailable	unavailable	187
Split-Dalmacija	SINJ, Tehnička i industrijska R. Boškovića	SPL_Sinj_Teh	OTHER	1998-01-09	2017-02-09	19.0856	18-20	RADOŠIČ	SPLIT-DALMACIJA	1	unavailable	unavailable	unavailable	182.8
Split-Dalmacija	SINJ, Tehnička i industrijska R. Boškovića	SPL_Sinj_Teh	OTHER	1997-11-30	2017-02-09	19.1951	18-20	HRVACE	SPLIT-DALMACIJA	1	unavailable	unavailable	unavailable	179.4
Split-Dalmacija	SINJ, Tehnička i industrijska R. Boškovića	SPL_Sinj_Teh	OTHER	1997-11-23	2017-02-09	19.2142	18-20	RUMIN	SPLIT-DALMACIJA	1	unavailable	unavailable	unavailable	191.3
Split-Dalmacija	SPLIT, Ekonomsko-birotehnička	SPL_Spl_Ekon	OTHER	1998-03-23	2015-10-15	17.5633	17	KAŠTELA	SPLIT-DALMACIJA	3	YES	YES	BOTH PARENTS	184.5
Split-Dalmacija	SPLIT, Ekonomsko-birotehnička	SPL_Spl_Ekon	OTHER	1998-03-25	2015-10-27	17.5907	17	SPLIT	SPLIT-DALMACIJA	3	YES	YES	BOTH PARENTS	188.1
Split-Dalmacija	SPLIT, Ekonomsko-birotehnička	SPL_Spl_Ekon	OTHER	1997-08-23	2015-10-15	18.1437	18-20	ŽRNOVNICA	SPLIT-DALMACIJA	1	YES	YES	BOTH PARENTS	176
Split-Dalmacija	SPLIT, Ekonomsko-birotehnička	SPL_Spl_Ekon	OTHER	1997-08-10	2015-10-15	18.1793	18-20	SPLIT	SPLIT-DALMACIJA	3	YES	YES	BOTH PARENTS	175.9
Split-Dalmacija	SPLIT, Ekonomsko-birotehnička	SPL_Spl_Ekon	OTHER	1997-05-05	2015-10-15	18.4449	18-20	SPLIT	SPLIT-DALMACIJA	3	YES	YES	BOTH PARENTS	186.5
Split-Dalmacija	SPLIT, Ekonomsko-birotehnička	SPL_Spl_Ekon	OTHER	1997-04-19	2015-10-15	18.4887	18-20	SPLIT	SPLIT-DALMACIJA	3	YES	YES	BOTH PARENTS	166.3
Split-Dalmacija	SPLIT, Ekonomsko-birotehnička	SPL_Spl_Ekon	OTHER	1997-04-12	2015-10-27	18.5407	18-20	SOLIN	SPLIT-DALMACIJA	2	YES	YES	BOTH PARENTS	188
Split-Dalmacija	SPLIT, Ekonomsko-birotehnička	SPL_Spl_Ekon	OTHER	1997-03-02	2015-10-27	18.653	18-20	SPLIT	SPLIT-DALMACIJA	3	YES	YES	BOTH PARENTS	178.6
Split-Dalmacija	SPLIT, Ekonomsko-birotehnička	SPL_Spl_Ekon	OTHER	1998-03-16	2015-10-15	17.5825	17	SPLIT	SPLIT-DALMACIJA	3	NO	NO	NEITHER	185.1
Split-Dalmacija	SPLIT, Ekonomsko-birotehnička	SPL_Spl_Ekon	OTHER	1998-03-08	2015-10-15	17.6044	17	SPLIT	SPLIT-DALMACIJA	3	NO	NO	NEITHER	182.5
Split-Dalmacija	SPLIT, Ekonomsko-birotehnička	SPL_Spl_Ekon	OTHER	1998-02-02	2015-10-27	17.7303	17	SPLIT	SPLIT-DALMACIJA	3	NO	NO	NEITHER	198.4
Split-Dalmacija	SPLIT, Ekonomsko-birotehnička	SPL_Spl_Ekon	OTHER	1998-01-10	2015-10-15	17.7604	17	SPLIT	SPLIT-DALMACIJA	3	NO	NO	NEITHER	187.8
Split-Dalmacija	SPLIT, Ekonomsko-birotehnička	SPL_Spl_Ekon	OTHER	1998-01-13	2015-10-27	17.7851	17	SPLIT	SPLIT-DALMACIJA	3	NO	NO	NEITHER	187.1
Split-Dalmacija	SPLIT, Ekonomsko-birotehnička	SPL_Spl_Ekon	OTHER	1998-01-04	2015-10-27	17.8097	17	SOLIN	SPLIT-DALMACIJA	2	NO	NO	NEITHER	191.1
Split-Dalmacija	SPLIT, Ekonomsko-birotehnička	SPL_Spl_Ekon	OTHER	1997-12-22	2015-10-27	17.8453	17	KAŠTELA	SPLIT-DALMACIJA	3	NO	NO	NEITHER	187.2
Split-Dalmacija	SPLIT, Ekonomsko-birotehnička	SPL_Spl_Ekon	OTHER	1997-12-05	2015-10-15	17.859	17	SINJ	SPLIT-DALMACIJA	2	NO	NO	NEITHER	185.1
Split-Dalmacija	SPLIT, Ekonomsko-birotehnička	SPL_Spl_Ekon	OTHER	1997-12-03	2015-10-15	17.8645	17	SPLIT	SPLIT-DALMACIJA	3	NO	NO	NEITHER	190.6
Split-Dalmacija	SPLIT, Ekonomsko-birotehnička	SPL_Spl_Ekon	OTHER	1997-11-29	2015-10-27	17.9083	17	SPLIT	SPLIT-DALMACIJA	3	NO	NO	NEITHER	177.3
Split-Dalmacija	SPLIT, Ekonomsko-birotehnička	SPL_Spl_Ekon	OTHER	1997-11-03	2015-10-15	17.9466	17	SPLIT	SPLIT-DALMACIJA	3	NO	NO	NEITHER	196
Split-Dalmacija	SPLIT, Ekonomsko-birotehnička	SPL_Spl_Ekon	OTHER	1997-11-09	2015-10-27	17.963	17	SPLIT	SPLIT-DALMACIJA	3	NO	NO	NEITHER	191.4
Split-Dalmacija	SPLIT, Ekonomsko-birotehnička	SPL_Spl_Ekon	OTHER	1997-09-22	2015-10-15	18.0616	18-20	SPLIT	SPLIT-DALMACIJA	3	NO	NO	NEITHER	175.8
Split-Dalmacija	SPLIT, Ekonomsko-birotehnička	SPL_Spl_Ekon	OTHER	1997-10-03	2015-10-27	18.0643	18-20	KAŠTELA	SPLIT-DALMACIJA	3	NO	NO	NEITHER	177.5
Split-Dalmacija	SPLIT, Ekonomsko-birotehnička	SPL_Spl_Ekon	OTHER	1997-09-30	2015-10-27	18.0726	18-20	SPLIT	SPLIT-DALMACIJA	3	NO	NO	NEITHER	169
Split-Dalmacija	SPLIT, Ekonomsko-birotehnička	SPL_Spl_Ekon	OTHER	1997-08-26	2015-10-15	18.1355	18-20	KAŠTELA	SPLIT-DALMACIJA	3	NO	NO	NEITHER	192.9
Split-Dalmacija	SPLIT, Ekonomsko-birotehnička	SPL_Spl_Ekon	OTHER	1997-08-24	2015-10-15	18.141	18-20	PODSTRANA	SPLIT-DALMACIJA	1	NO	NO	NEITHER	194.2
Split-Dalmacija	SPLIT, Ekonomsko-birotehnička	SPL_Spl_Ekon	OTHER	1997-09-02	2015-10-27	18.1492	18-20	SPLIT	SPLIT-DALMACIJA	3	NO	NO	NEITHER	177.6
Split-Dalmacija	SPLIT, Ekonomsko-birotehnička	SPL_Spl_Ekon	OTHER	1997-08-21	2015-10-27	18.1821	18-20	SPLIT	SPLIT-DALMACIJA	3	NO	NO	NEITHER	172
Split-Dalmacija	SPLIT, Ekonomsko-birotehnička	SPL_Spl_Ekon	OTHER	1997-07-28	2015-10-15	18.2149	18-20	SOLIN	SPLIT-DALMACIJA	2	NO	NO	NEITHER	185.7
Split-Dalmacija	SPLIT, Ekonomsko-birotehnička	SPL_Spl_Ekon	OTHER	1997-07-10	2015-10-15	18.2642	18-20	SPLIT	SPLIT-DALMACIJA	3	NO	NO	NEITHER	188.2
Split-Dalmacija	SPLIT, Ekonomsko-birotehnička	SPL_Spl_Ekon	OTHER	1997-07-22	2015-10-27	18.2642	18-20	SPLIT	SPLIT-DALMACIJA	3	NO	NO	NEITHER	184.3
Split-Dalmacija	SPLIT, Ekonomsko-birotehnička	SPL_Spl_Ekon	OTHER	1997-07-18	2015-10-27	18.2752	18-20	SPLIT	SPLIT-DALMACIJA	3	NO	NO	NEITHER	195.4
Split-Dalmacija	SPLIT, Ekonomsko-birotehnička	SPL_Spl_Ekon	OTHER	1997-07-13	2015-10-27	18.2888	18-20	STOBREČ	SPLIT-DALMACIJA	1	NO	NO	NEITHER	183.7
Split-Dalmacija	SPLIT, Ekonomsko-birotehnička	SPL_Spl_Ekon	OTHER	1997-06-05	2015-10-15	18.36	18-20	OMIŠ	SPLIT-DALMACIJA	2	NO	NO	NEITHER	173.3
Split-Dalmacija	SPLIT, Ekonomsko-birotehnička	SPL_Spl_Ekon	OTHER	1997-05-28	2015-10-15	18.3819	18-20	SPLIT	SPLIT-DALMACIJA	3	NO	NO	NEITHER	184.7
Split-Dalmacija	SPLIT, Ekonomsko-birotehnička	SPL_Spl_Ekon	OTHER	1997-05-14	2015-10-27	18.4531	18-20	SPLIT	SPLIT-DALMACIJA	3	NO	NO	NEITHER	182.1
Split-Dalmacija	SPLIT, Ekonomsko-birotehnička	SPL_Spl_Ekon	OTHER	1997-04-24	2015-10-27	18.5079	18-20	SPLIT	SPLIT-DALMACIJA	3	NO	NO	NEITHER	186
Split-Dalmacija	SPLIT, Ekonomsko-birotehnička	SPL_Spl_Ekon	OTHER	1997-02-18	2015-10-15	18.653	18-20	KAŠTELA	SPLIT-DALMACIJA	3	NO	NO	NEITHER	179
Split-Dalmacija	SPLIT, Ekonomsko-birotehnička	SPL_Spl_Ekon	OTHER	1997-01-05	2015-10-27	18.8063	18-20	KUČINE	SPLIT-DALMACIJA	1	NO	NO	NEITHER	188.6
Split-Dalmacija	SPLIT, Ekonomsko-birotehnička	SPL_Spl_Ekon	OTHER	1996-11-08	2015-10-15	18.9322	18-20	SPLIT	SPLIT-DALMACIJA	3	NO	NO	NEITHER	177.1
Split-Dalmacija	SPLIT, Ekonomsko-birotehnička	SPL_Spl_Ekon	OTHER	1996-06-28	2015-10-27	19.3292	18-20	SPLIT	SPLIT-DALMACIJA	3	NO	NO	NEITHER	193.5
Split-Dalmacija	SPLIT, Ekonomsko-birotehnička	SPL_Spl_Ekon	OTHER	1996-06-09	2015-10-15	19.3484	18-20	SPLIT	SPLIT-DALMACIJA	3	NO	NO	NEITHER	191.3
Split-Dalmacija	SPLIT, Ekonomsko-birotehnička	SPL_Spl_Ekon	OTHER	1998-03-31	2015-10-15	17.5414	17	SPLIT	SPLIT-DALMACIJA	3	NO	YES	ONE PARENT	194.5
Split-Dalmacija	SPLIT, Ekonomsko-birotehnička	SPL_Spl_Ekon	OTHER	1998-02-08	2015-10-27	17.7139	17	SPLIT	SPLIT-DALMACIJA	3	NO	YES	ONE PARENT	184
Split-Dalmacija	SPLIT, Ekonomsko-birotehnička	SPL_Spl_Ekon	OTHER	1998-02-02	2015-10-27	17.7303	17	SPLIT	SPLIT-DALMACIJA	3	YES	NO	ONE PARENT	181.4
Split-Dalmacija	SPLIT, Ekonomsko-birotehnička	SPL_Spl_Ekon	OTHER	1998-01-11	2015-10-27	17.7906	17	SPLIT	SPLIT-DALMACIJA	3	NO	YES	ONE PARENT	193.4
Split-Dalmacija	SPLIT, Ekonomsko-birotehnička	SPL_Spl_Ekon	OTHER	1997-10-18	2015-10-15	17.9904	17	SPLIT	SPLIT-DALMACIJA	3	NO	YES	ONE PARENT	179.2
Split-Dalmacija	SPLIT, Ekonomsko-birotehnička	SPL_Spl_Ekon	OTHER	1997-09-30	2015-10-27	18.0726	18-20	SPLIT	SPLIT-DALMACIJA	3	YES	NO	ONE PARENT	192.4
Split-Dalmacija	SPLIT, Ekonomsko-birotehnička	SPL_Spl_Ekon	OTHER	1997-07-21	2015-10-15	18.2341	18-20	SPLIT	SPLIT-DALMACIJA	3	NO	YES	ONE PARENT	178.4
Split-Dalmacija	SPLIT, Ekonomsko-birotehnička	SPL_Spl_Ekon	OTHER	1997-06-20	2015-10-27	18.3518	18-20	SPLIT	SPLIT-DALMACIJA	3	YES	NO	ONE PARENT	191.9
Split-Dalmacija	SPLIT, Ekonomsko-birotehnička	SPL_Spl_Ekon	OTHER	1997-06-19	2015-10-27	18.3546	18-20	SPLIT	SPLIT-DALMACIJA	3	NO	YES	ONE PARENT	186.7
Split-Dalmacija	SPLIT, Ekonomsko-birotehnička	SPL_Spl_Ekon	OTHER	1997-05-19	2015-10-15	18.4066	18-20	SPLIT	SPLIT-DALMACIJA	3	NO	YES	ONE PARENT	186.8
Split-Dalmacija	SPLIT, Ekonomsko-birotehnička	SPL_Spl_Ekon	OTHER	1997-05-03	2015-10-27	18.4832	18-20	SPLIT	SPLIT-DALMACIJA	3	NO	YES	ONE PARENT	185.3
Split-Dalmacija	SPLIT, Ekonomsko-birotehnička	SPL_Spl_Ekon	OTHER	1997-04-18	2015-10-15	18.4914	18-20	SPLIT	SPLIT-DALMACIJA	3	NO	YES	ONE PARENT	171.3
Split-Dalmacija	SPLIT, Ekonomsko-birotehnička	SPL_Spl_Ekon	OTHER	1997-04-16	2015-10-15	18.4969	18-20	SPLIT	SPLIT-DALMACIJA	3	YES	NO	ONE PARENT	186.4
Split-Dalmacija	SPLIT, Ekonomsko-birotehnička	SPL_Spl_Ekon	OTHER	1997-04-13	2015-10-15	18.5051	18-20	SPLIT	SPLIT-DALMACIJA	3	YES	NO	ONE PARENT	172.9
Split-Dalmacija	SPLIT, Ekonomsko-birotehnička	SPL_Spl_Ekon	OTHER	1997-04-07	2015-10-27	18.5544	18-20	SPLIT	SPLIT-DALMACIJA	3	YES	NO	ONE PARENT	179.6
Split-Dalmacija	SPLIT, Ekonomsko-birotehnička	SPL_Spl_Ekon	OTHER	1997-04-06	2015-10-27	18.5572	18-20	KAMEN	SPLIT-DALMACIJA	1	YES	NO	ONE PARENT	177.8
Split-Dalmacija	SPLIT, Ekonomsko-birotehnička	SPL_Spl_Ekon	OTHER	1997-03-12	2015-10-27	18.6256	18-20	SPLIT	SPLIT-DALMACIJA	3	YES	NO	ONE PARENT	176.2
Split-Dalmacija	SPLIT, Ekonomsko-birotehnička	SPL_Spl_Ekon	OTHER	1996-09-09	2015-10-15	19.0965	18-20	KAŠTELA	SPLIT-DALMACIJA	3	YES	NO	ONE PARENT	180.3
Split-Dalmacija	SPLIT, Ekonomsko-birotehnička	SPL_Spl_Ekon	OTHER	1996-07-17	2015-10-27	19.2772	18-20	SPLIT	SPLIT-DALMACIJA	3	YES	NO	ONE PARENT	182.7
Split-Dalmacija	SPLIT, Ekonomsko-birotehnička	SPL_Spl_Ekon	OTHER	1996-03-10	2015-10-27	19.6304	18-20	SPLIT	SPLIT-DALMACIJA	3	NO	YES	ONE PARENT	202.4
Split-Dalmacija	SPLIT, Graditeljsko-geodetska tehnička	SPL_Spl_Grad	OTHER	1998-04-02	2016-04-18	18.0452	18-20	SPLIT	SPLIT-DALMACIJA	3	YES	YES	BOTH PARENTS	179.5
Split-Dalmacija	SPLIT, Graditeljsko-geodetska tehnička	SPL_Spl_Grad	OTHER	1998-02-03	2016-04-18	18.204	18-20	SPLIT	SPLIT-DALMACIJA	3	YES	YES	BOTH PARENTS	174.4
Split-Dalmacija	SPLIT, Graditeljsko-geodetska tehnička	SPL_Spl_Grad	OTHER	1998-10-03	2016-04-18	17.5414	17	KRSTATICE	SPLIT-DALMACIJA	1	NO	NO	NEITHER	177.5
Split-Dalmacija	SPLIT, Graditeljsko-geodetska tehnička	SPL_Spl_Grad	OTHER	1998-09-30	2016-04-18	17.5496	17	SOLIN	SPLIT-DALMACIJA	2	NO	NO	NEITHER	188.3
Split-Dalmacija	SPLIT, Graditeljsko-geodetska tehnička	SPL_Spl_Grad	OTHER	1998-09-23	2016-04-18	17.5688	17	SPLIT	SPLIT-DALMACIJA	3	NO	NO	NEITHER	193
Split-Dalmacija	SPLIT, Graditeljsko-geodetska tehnička	SPL_Spl_Grad	OTHER	1998-06-25	2016-04-18	17.8152	17	SPLIT	SPLIT-DALMACIJA	3	NO	NO	NEITHER	185.6
Split-Dalmacija	SPLIT, Graditeljsko-geodetska tehnička	SPL_Spl_Grad	OTHER	1998-06-13	2016-04-18	17.848	17	SPLIT	SPLIT-DALMACIJA	3	NO	NO	NEITHER	180.2
Split-Dalmacija	SPLIT, Graditeljsko-geodetska tehnička	SPL_Spl_Grad	OTHER	1998-06-06	2016-04-18	17.8672	17	TUGARE	SPLIT-DALMACIJA	1	NO	NO	NEITHER	187.5
Split-Dalmacija	SPLIT, Graditeljsko-geodetska tehnička	SPL_Spl_Grad	OTHER	1998-04-21	2016-04-18	17.9932	17	SPLIT	SPLIT-DALMACIJA	3	NO	NO	NEITHER	189.4
Split-Dalmacija	SPLIT, Graditeljsko-geodetska tehnička	SPL_Spl_Grad	OTHER	1998-04-03	2016-04-18	18.0424	18-20	SPLIT	SPLIT-DALMACIJA	3	NO	NO	NEITHER	175.7
Split-Dalmacija	SPLIT, Graditeljsko-geodetska tehnička	SPL_Spl_Grad	OTHER	1998-03-30	2016-04-18	18.0534	18-20	SPLIT	SPLIT-DALMACIJA	3	NO	NO	NEITHER	180
Split-Dalmacija	SPLIT, Graditeljsko-geodetska tehnička	SPL_Spl_Grad	OTHER	1998-03-23	2016-04-18	18.0726	18-20	KAŠTELA	SPLIT-DALMACIJA	3	NO	NO	NEITHER	184.5
Split-Dalmacija	SPLIT, Graditeljsko-geodetska tehnička	SPL_Spl_Grad	OTHER	1998-03-11	2016-04-18	18.1054	18-20	MAKARSKA	SPLIT-DALMACIJA	2	NO	NO	NEITHER	197.4
Split-Dalmacija	SPLIT, Graditeljsko-geodetska tehnička	SPL_Spl_Grad	OTHER	1998-01-23	2016-04-18	18.2341	18-20	SOLIN	SPLIT-DALMACIJA	2	NO	NO	NEITHER	191.7
Split-Dalmacija	SPLIT, Graditeljsko-geodetska tehnička	SPL_Spl_Grad	OTHER	1998-01-11	2016-04-18	18.2669	18-20	DILMO	SPLIT-DALMACIJA	1	NO	NO	NEITHER	191.3
Split-Dalmacija	SPLIT, Graditeljsko-geodetska tehnička	SPL_Spl_Grad	OTHER	1997-10-08	2016-04-18	18.527	18-20	SPLIT	SPLIT-DALMACIJA	3	NO	NO	NEITHER	187.7
Split-Dalmacija	SPLIT, Graditeljsko-geodetska tehnička	SPL_Spl_Grad	OTHER	1997-09-23	2016-04-18	18.5681	18-20	DUGOPOLJE	SPLIT-DALMACIJA	1	NO	NO	NEITHER	187.2
Split-Dalmacija	SPLIT, Graditeljsko-geodetska tehnička	SPL_Spl_Grad	OTHER	1997-09-09	2016-04-18	18.6064	18-20	DUGOPOLJE	SPLIT-DALMACIJA	1	NO	NO	NEITHER	182.9
Split-Dalmacija	SPLIT, Graditeljsko-geodetska tehnička	SPL_Spl_Grad	OTHER	1997-09-01	2016-04-18	18.6283	18-20	SOLIN	SPLIT-DALMACIJA	2	NO	NO	NEITHER	184.4
Split-Dalmacija	SPLIT, Graditeljsko-geodetska tehnička	SPL_Spl_Grad	OTHER	1997-08-28	2016-04-18	18.6393	18-20	SPLIT	SPLIT-DALMACIJA	3	NO	NO	NEITHER	187.2
Split-Dalmacija	SPLIT, Graditeljsko-geodetska tehnička	SPL_Spl_Grad	OTHER	1997-08-19	2016-04-18	18.6639	18-20	SPLIT	SPLIT-DALMACIJA	3	NO	NO	NEITHER	200.4
Split-Dalmacija	SPLIT, Graditeljsko-geodetska tehnička	SPL_Spl_Grad	OTHER	1997-08-19	2016-04-18	18.6639	18-20	SPLIT	SPLIT-DALMACIJA	3	NO	NO	NEITHER	179.1
Split-Dalmacija	SPLIT, Graditeljsko-geodetska tehnička	SPL_Spl_Grad	OTHER	1997-07-25	2016-04-18	18.7324	18-20	SPLIT	SPLIT-DALMACIJA	3	NO	NO	NEITHER	183.4
Split-Dalmacija	SPLIT, Graditeljsko-geodetska tehnička	SPL_Spl_Grad	OTHER	1997-07-24	2016-04-18	18.7351	18-20	SPLIT	SPLIT-DALMACIJA	3	NO	NO	NEITHER	193
Split-Dalmacija	SPLIT, Graditeljsko-geodetska tehnička	SPL_Spl_Grad	OTHER	1997-07-21	2016-04-18	18.7433	18-20	KLIŠ	SPLIT-DALMACIJA	1	NO	NO	NEITHER	193.1
Split-Dalmacija	SPLIT, Graditeljsko-geodetska tehnička	SPL_Spl_Grad	OTHER	1997-06-20	2016-04-18	18.8282	18-20	SPLIT	SPLIT-DALMACIJA	3	NO	NO	NEITHER	187.4
Split-Dalmacija	SPLIT, Graditeljsko-geodetska tehnička	SPL_Spl_Grad	OTHER	1997-05-03	2016-04-18	18.9596	18-20	OTOK	SPLIT-DALMACIJA	1	NO	NO	NEITHER	181.7
Split-Dalmacija	SPLIT, Graditeljsko-geodetska tehnička	SPL_Spl_Grad	OTHER	1997-04-15	2016-04-18	19.0089	18-20	SPLIT	SPLIT-DALMACIJA	3	NO	NO	NEITHER	185.4
Split-Dalmacija	SPLIT, Graditeljsko-geodetska tehnička	SPL_Spl_Grad	OTHER	1997-04-10	2016-04-18	19.0226	18-20	SPLIT	SPLIT-DALMACIJA	3	NO	NO	NEITHER	183
Split-Dalmacija	SPLIT, Graditeljsko-geodetska tehnička	SPL_Spl_Grad	OTHER	1997-03-14	2016-04-18	19.0965	18-20	ŠIBENIK	ŠIBENIK-KNIN	3	NO	NO	NEITHER	185
Split-Dalmacija	SPLIT, Graditeljsko-geodetska tehnička	SPL_Spl_Grad	OTHER	1998-04-07	2016-04-18	18.0315	18-20	SPLIT	SPLIT-DALMACIJA	3	YES	NO	ONE PARENT	184.5
Split-Dalmacija	SPLIT, Graditeljsko-geodetska tehnička	SPL_Spl_Grad	OTHER	1998-03-24	2016-04-18	18.0698	18-20	SPLIT	SPLIT-DALMACIJA	3	YES	NO	ONE PARENT	185.4
Split-Dalmacija	SPLIT, Graditeljsko-geodetska tehnička	SPL_Spl_Grad	OTHER	1997-04-19	2016-04-18	18.9979	18-20	SPLIT	SPLIT-DALMACIJA	3	YES	NO	ONE PARENT	183.3
Split-Dalmacija	SPLIT, Graditeljsko-geodetska tehnička	SPL_Spl_Grad	OTHER	1997-02-09	2016-04-18	19.1869	18-20	SPLIT	SPLIT-DALMACIJA	3	NO	YES	ONE PARENT	178.5
Split-Dalmacija	SPLIT, Likovnih umjetnosti	SPL_Spl_Lik	OTHER	1998-07-27	2016-04-18	17.7276	17	SPLIT	SPLIT-DALMACIJA	3	unavailable	unavailable	unavailable	185
Split-Dalmacija	SPLIT, Likovnih umjetnosti	SPL_Spl_Lik	OTHER	1998-06-24	2016-04-18	17.8179	17	SPLIT	SPLIT-DALMACIJA	3	unavailable	unavailable	unavailable	185.9
Split-Dalmacija	SPLIT, Likovnih umjetnosti	SPL_Spl_Lik	OTHER	1998-03-28	2016-04-18	18.0589	18-20	KAŠTELA	SPLIT-DALMACIJA	3	unavailable	unavailable	unavailable	183.2
Split-Dalmacija	SPLIT, Likovnih umjetnosti	SPL_Spl_Lik	OTHER	1997-11-30	2016-04-18	18.3819	18-20	PRAŽNICA O. BRAČ	SPLIT-DALMACIJA	1	unavailable	unavailable	unavailable	168.3
Split-Dalmacija	SPLIT, Likovnih umjetnosti	SPL_Spl_Lik	OTHER	1997-10-31	2016-04-18	18.4641	18-20	VODICE	ŠIBENIK-KNIN	1	unavailable	unavailable	unavailable	183
Split-Dalmacija	SPLIT, Likovnih umjetnosti	SPL_Spl_Lik	OTHER	1997-10-18	2016-04-18	18.4997	18-20	VODICE	ŠIBENIK-KNIN	1	unavailable	unavailable	unavailable	182.4
Split-Dalmacija	SPLIT, Likovnih umjetnosti	SPL_Spl_Lik	OTHER	1997-08-13	2016-04-18	18.6804	18-20	SPLIT	SPLIT-DALMACIJA	3	unavailable	unavailable	unavailable	178.5
Split-Dalmacija	SPLIT, Likovnih umjetnosti	SPL_Spl_Lik	OTHER	1997-07-25	2016-04-18	18.7324	18-20	KAŠTELA	SPLIT-DALMACIJA	3	unavailable	unavailable	unavailable	176.4
Split-Dalmacija	SPLIT, Likovnih umjetnosti	SPL_Spl_Lik	OTHER	1997-07-06	2016-04-18	18.7844	18-20	SOLIN	SPLIT-DALMACIJA	2	unavailable	unavailable	unavailable	187
Split-Dalmacija	SPLIT, Pomorska škola	SPL_Spl_Pom	OTHER	1998-10-09	2016-06-01	17.6454	17	TURJACI	SPLIT-DALMACIJA	1	YES	YES	BOTH PARENTS	168.5
Split-Dalmacija	SPLIT, Pomorska škola	SPL_Spl_Pom	OTHER	1998-09-04	2016-06-01	17.7413	17	DUGOPOLJE	SPLIT-DALMACIJA	1	YES	YES	BOTH PARENTS	178.5
Split-Dalmacija	SPLIT, Pomorska škola	SPL_Spl_Pom	OTHER	1998-07-30	2016-06-01	17.8398	17	BRDA	SPLIT-DALMACIJA	1	YES	YES	BOTH PARENTS	187.7
Split-Dalmacija	SPLIT, Pomorska škola	SPL_Spl_Pom	OTHER	1998-07-29	2016-06-01	17.8426	17	PODSTRANA	SPLIT-DALMACIJA	1	YES	YES	BOTH PARENTS	179.6
Split-Dalmacija	SPLIT, Pomorska škola	SPL_Spl_Pom	OTHER	1998-07-17	2016-06-01	17.8754	17	JESENICE	SPLIT-DALMACIJA	1	YES	YES	BOTH PARENTS	186.7
Split-Dalmacija	SPLIT, Pomorska škola	SPL_Spl_Pom	OTHER	1998-07-12	2016-06-01	17.8891	17	SPLIT	SPLIT-DALMACIJA	3	YES	YES	BOTH PARENTS	185.8
Split-Dalmacija	SPLIT, Pomorska škola	SPL_Spl_Pom	OTHER	1998-06-05	2016-06-01	17.9904	17	SPLIT	SPLIT-DALMACIJA	3	YES	YES	BOTH PARENTS	180.6
Split-Dalmacija	SPLIT, Pomorska škola	SPL_Spl_Pom	OTHER	1998-05-20	2016-06-01	18.0342	18-20	MARINA	SPLIT-DALMACIJA	1	YES	YES	BOTH PARENTS	169.3
Split-Dalmacija	SPLIT, Pomorska škola	SPL_Spl_Pom	OTHER	1998-11-10	2016-06-01	17.5578	17	DUBROVNIK	DUBROVNIK-NERETVA	3	NO	NO	NEITHER	174.7
Split-Dalmacija	SPLIT, Pomorska škola	SPL_Spl_Pom	OTHER	1998-10-20	2016-06-01	17.6153	17	SPLIT	SPLIT-DALMACIJA	3	NO	NO	NEITHER	188.9
Split-Dalmacija	SPLIT, Pomorska škola	SPL_Spl_Pom	OTHER	1998-10-19	2016-06-01	17.6181	17	SPLIT	SPLIT-DALMACIJA	3	NO	NO	NEITHER	179.5
Split-Dalmacija	SPLIT, Pomorska škola	SPL_Spl_Pom	OTHER	1998-10-06	2016-06-01	17.6537	17	SUMPETAR	SPLIT-DALMACIJA	1	NO	NO	NEITHER	183
Split-Dalmacija	SPLIT, Pomorska škola	SPL_Spl_Pom	OTHER	1998-09-25	2016-06-01	17.6838	17	PODSTRANA	SPLIT-DALMACIJA	1	NO	NO	NEITHER	183.3
Split-Dalmacija	SPLIT, Pomorska škola	SPL_Spl_Pom	OTHER	1998-09-13	2016-06-01	17.7166	17	SOLIN	SPLIT-DALMACIJA	2	NO	NO	NEITHER	180.6
Split-Dalmacija	SPLIT, Pomorska škola	SPL_Spl_Pom	OTHER	1998-08-22	2016-06-01	17.7769	17	PLOČE	DUBROVNIK-NERETVA	2	NO	NO	NEITHER	183.1
Split-Dalmacija	SPLIT, Pomorska škola	SPL_Spl_Pom	OTHER	1998-08-20	2016-06-01	17.7823	17	SPLIT	SPLIT-DALMACIJA	3	NO	NO	NEITHER	183.4
Split-Dalmacija	SPLIT, Pomorska škola	SPL_Spl_Pom	OTHER	1998-07-28	2016-06-01	17.8453	17	SPLIT	SPLIT-DALMACIJA	3	NO	NO	NEITHER	183.8
Split-Dalmacija	SPLIT, Pomorska škola	SPL_Spl_Pom	OTHER	1998-07-13	2016-06-01	17.8864	17	TUGARE	SPLIT-DALMACIJA	1	NO	NO	NEITHER	186.5
Split-Dalmacija	SPLIT, Pomorska škola	SPL_Spl_Pom	OTHER	1998-07-04	2016-06-01	17.911	17	PODSTRANA	SPLIT-DALMACIJA	1	NO	NO	NEITHER	183
Split-Dalmacija	SPLIT, Pomorska škola	SPL_Spl_Pom	OTHER	1998-07-01	2016-06-01	17.9192	17	SPLIT	SPLIT-DALMACIJA	3	NO	NO	NEITHER	192.3
Split-Dalmacija	SPLIT, Pomorska škola	SPL_Spl_Pom	OTHER	1998-06-29	2016-06-01	17.9247	17	SUMPETAR	SPLIT-DALMACIJA	1	NO	NO	NEITHER	190.5
Split-Dalmacija	SPLIT, Pomorska škola	SPL_Spl_Pom	OTHER	1998-06-24	2016-06-01	17.9384	17	SPLIT	SPLIT-DALMACIJA	3	NO	NO	NEITHER	192.5
Split-Dalmacija	SPLIT, Pomorska škola	SPL_Spl_Pom	OTHER	1998-04-30	2016-06-01	18.089	18-20	SUĆURAJ	SPLIT-DALMACIJA	1	NO	NO	NEITHER	183.7
Split-Dalmacija	SPLIT, Pomorska škola	SPL_Spl_Pom	OTHER	1998-04-21	2016-06-01	18.1136	18-20	SPLIT	SPLIT-DALMACIJA	3	NO	NO	NEITHER	187.4
Split-Dalmacija	SPLIT, Pomorska škola	SPL_Spl_Pom	OTHER	1998-04-10	2016-06-01	18.1437	18-20	SPLIT	SPLIT-DALMACIJA	3	NO	NO	NEITHER	183
Split-Dalmacija	SPLIT, Pomorska škola	SPL_Spl_Pom	OTHER	1998-03-29	2016-06-01	18.1766	18-20	SPLIT	SPLIT-DALMACIJA	3	NO	NO	NEITHER	167
Split-Dalmacija	SPLIT, Pomorska škola	SPL_Spl_Pom	OTHER	1997-11-10	2016-06-01	18.5572	18-20	SPLIT	SPLIT-DALMACIJA	3	NO	NO	NEITHER	178.5
Split-Dalmacija	SPLIT, Pomorska škola	SPL_Spl_Pom	OTHER	1997-09-16	2016-06-01	18.7077	18-20	SPLIT	SPLIT-DALMACIJA	3	NO	NO	NEITHER	178.7
Split-Dalmacija	SPLIT, Pomorska škola	SPL_Spl_Pom	OTHER	1998-10-09	2016-06-01	17.6454	17	STOBREĆ	SPLIT-DALMACIJA	1	NO	YES	ONE PARENT	191
Split-Dalmacija	SPLIT, Pomorska škola	SPL_Spl_Pom	OTHER	1998-09-29	2016-06-01	17.6728	17	SPLIT	SPLIT-DALMACIJA	3	NO	YES	ONE PARENT	185.5
Split-Dalmacija	SPLIT, Pomorska škola	SPL_Spl_Pom	OTHER	1998-09-27	2016-06-01	17.6783	17	SPLIT	SPLIT-DALMACIJA	3	NO	YES	ONE PARENT	190.8
Split-Dalmacija	SPLIT, Pomorska škola	SPL_Spl_Pom	OTHER	1998-09-08	2016-06-01	17.7303	17	SPLIT	SPLIT-DALMACIJA	3	NO	YES	ONE PARENT	175.6
Split-Dalmacija	SPLIT, Pomorska škola	SPL_Spl_Pom	OTHER	1998-09-01	2016-06-01	17.7495	17	SPLIT	SPLIT-DALMACIJA	3	YES	NO	ONE PARENT	189.4
Split-Dalmacija	SPLIT, Pomorska škola	SPL_Spl_Pom	OTHER	1998-08-14	2016-06-01	17.7988	17	STOBREĆ	SPLIT-DALMACIJA	1	NO	YES	ONE PARENT	179.1
Split-Dalmacija	SPLIT, Pomorska škola	SPL_Spl_Pom	OTHER	1998-07-15	2016-06-01	17.8809	17	KOMIŽA	SPLIT-DALMACIJA	1	NO	YES	ONE PARENT	175.6
Split-Dalmacija	SPLIT, Pomorska škola	SPL_Spl_Pom	OTHER	1998-07-10	2016-06-01	17.8946	17	SPLIT	SPLIT-DALMACIJA	3	NO	YES	ONE PARENT	184.4
Split-Dalmacija	SPLIT, Pomorska škola	SPL_Spl_Pom	OTHER	1998-06-24	2016-06-01	17.9384	17	SPLIT	SPLIT-DALMACIJA	3	YES	NO	ONE PARENT	172.7
Split-Dalmacija	SPLIT, Pomorska škola	SPL_Spl_Pom	OTHER	1998-06-13	2016-06-01	17.9685	17	SPLIT	SPLIT-DALMACIJA	3	NO	YES	ONE PARENT	187.5
Split-Dalmacija	SPLIT, Pomorska škola	SPL_Spl_Pom	OTHER	1998-03-10	2016-06-01	18.2286	18-20	PODSTRANA	SPLIT-DALMACIJA	1	YES	NO	ONE PARENT	185.5
Split-Dalmacija	SPLIT, Prva gimnazija	SPL_Spl_PrvGim	GIMNAZIJA	1998-03-18	2015-10-15	17.577	17	SPLIT	SPLIT-DALMACIJA	3	YES	YES	BOTH PARENTS	183
Split-Dalmacija	SPLIT, Prva gimnazija	SPL_Spl_PrvGim	GIMNAZIJA	1998-03-13	2015-10-27	17.6235	17	SPLIT	SPLIT-DALMACIJA	3	YES	YES	BOTH PARENTS	182.5
Split-Dalmacija	SPLIT, Prva gimnazija	SPL_Spl_PrvGim	GIMNAZIJA	1998-02-26	2015-10-27	17.6646	17	SOLIN	SPLIT-DALMACIJA	2	YES	YES	BOTH PARENTS	180.1
Split-Dalmacija	SPLIT, Prva gimnazija	SPL_Spl_PrvGim	GIMNAZIJA	1998-02-02	2015-10-27	17.7303	17	SPLIT	SPLIT-DALMACIJA	3	YES	YES	BOTH PARENTS	180.6
Split-Dalmacija	SPLIT, Prva gimnazija	SPL_Spl_PrvGim	GIMNAZIJA	1998-01-16	2015-10-27	17.7769	17	SPLIT	SPLIT-DALMACIJA	3	YES	YES	BOTH PARENTS	182.5
Split-Dalmacija	SPLIT, Prva gimnazija	SPL_Spl_PrvGim	GIMNAZIJA	1997-12-30	2015-10-15	17.7906	17	SPLIT	SPLIT-DALMACIJA	3	YES	YES	BOTH PARENTS	181
Split-Dalmacija	SPLIT, Prva gimnazija	SPL_Spl_PrvGim	GIMNAZIJA	1997-12-09	2015-10-15	17.848	17	SPLIT	SPLIT-DALMACIJA	3	YES	YES	BOTH PARENTS	175.2
Split-Dalmacija	SPLIT, Prva gimnazija	SPL_Spl_PrvGim	GIMNAZIJA	1997-12-05	2015-10-27	17.8919	17	SPLIT	SPLIT-DALMACIJA	3	YES	YES	BOTH PARENTS	187.4
Split-Dalmacija	SPLIT, Prva gimnazija	SPL_Spl_PrvGim	GIMNAZIJA	1997-10-21	2015-10-27	18.0151	18-20	SPLIT	SPLIT-DALMACIJA	3	YES	YES	BOTH PARENTS	187.5
Split-Dalmacija	SPLIT, Prva gimnazija	SPL_Spl_PrvGim	GIMNAZIJA	1997-10-06	2015-10-27	18.0561	18-20	SPLIT	SPLIT-DALMACIJA	3	YES	YES	BOTH PARENTS	185
Split-Dalmacija	SPLIT, Prva gimnazija	SPL_Spl_PrvGim	GIMNAZIJA	1997-09-23	2015-10-15	18.0589	18-20	SPLIT	SPLIT-DALMACIJA	3	YES	YES	BOTH PARENTS	172.7
Split-Dalmacija	SPLIT, Prva gimnazija	SPL_Spl_PrvGim	GIMNAZIJA	1997-09-17	2015-10-27	18.1081	18-20	SPLIT	SPLIT-DALMACIJA	3	YES	YES	BOTH PARENTS	185.7
Split-Dalmacija	SPLIT, Prva gimnazija	SPL_Spl_PrvGim	GIMNAZIJA	1997-09-03	2015-10-15	18.1136	18-20	SPLIT	SPLIT-DALMACIJA	3	YES	YES	BOTH PARENTS	179.8
Split-Dalmacija	SPLIT, Prva gimnazija	SPL_Spl_PrvGim	GIMNAZIJA	1997-09-09	2015-10-27	18.13	18-20	PODSTRANA	SPLIT-DALMACIJA	1	YES	YES	BOTH PARENTS	184.4
Split-Dalmacija	SPLIT, Prva gimnazija	SPL_Spl_PrvGim	GIMNAZIJA	1997-09-08	2015-10-27	18.1328	18-20	SPLIT	SPLIT-DALMACIJA	3	YES	YES	BOTH PARENTS	196.8
Split-Dalmacija	SPLIT, Prva gimnazija	SPL_Spl_PrvGim	GIMNAZIJA	1997-08-18	2015-10-27	18.1903	18-20	SPLIT	SPLIT-DALMACIJA	3	YES	YES	BOTH PARENTS	178.1
Split-Dalmacija	SPLIT, Prva gimnazija	SPL_Spl_PrvGim	GIMNAZIJA	1997-06-27	2015-10-27	18.3326	18-20	SPLIT	SPLIT-DALMACIJA	3	YES	YES	BOTH PARENTS	203.8
Split-Dalmacija	SPLIT, Prva gimnazija	SPL_Spl_PrvGim	GIMNAZIJA	1997-06-17	2015-10-27	18.36	18-20	SPLIT	SPLIT-DALMACIJA	3	YES	YES	BOTH PARENTS	194.2
Split-Dalmacija	SPLIT, Prva gimnazija	SPL_Spl_PrvGim	GIMNAZIJA	1997-05-07	2015-10-27	18.4723	18-20	SPLIT	SPLIT-DALMACIJA	3	YES	YES	BOTH PARENTS	201.3
Split-Dalmacija	SPLIT, Prva gimnazija	SPL_Spl_PrvGim	GIMNAZIJA	1997-04-12	2015-10-15	18.5079	18-20	SPLIT	SPLIT-DALMACIJA	3	YES	YES	BOTH PARENTS	181
Split-Dalmacija	SPLIT, Prva gimnazija	SPL_Spl_PrvGim	GIMNAZIJA	1997-04-23	2015-10-27	18.5106	18-20	SPLIT	SPLIT-DALMACIJA	3	YES	YES	BOTH PARENTS	186.2
Split-Dalmacija	SPLIT, Prva gimnazija	SPL_Spl_PrvGim	GIMNAZIJA	1997-02-21	2015-10-27	18.6776	18-20	SPLIT	SPLIT-DALMACIJA	3	YES	YES	BOTH PARENTS	183.4
Split-Dalmacija	SPLIT, Prva gimnazija	SPL_Spl_PrvGim	GIMNAZIJA	1998-03-29	2015-10-15	17.5469	17	SPLIT	SPLIT-DALMACIJA	3	NO	NO	NEITHER	183.2
Split-Dalmacija	SPLIT, Prva gimnazija	SPL_Spl_PrvGim	GIMNAZIJA	1998-02-25	2015-10-27	17.6674	17	SPLIT	SPLIT-DALMACIJA	3	NO	NO	NEITHER	180.2
Split-Dalmacija	SPLIT, Prva gimnazija	SPL_Spl_PrvGim	GIMNAZIJA	1997-11-14	2015-10-15	17.9165	17	MUĆ GORNJI	SPLIT-DALMACIJA	1	NO	NO	NEITHER	192.3
Split-Dalmacija	SPLIT, Prva gimnazija	SPL_Spl_PrvGim	GIMNAZIJA	1997-11-02	2015-10-15	17.9493	17	SPLIT	SPLIT-DALMACIJA	3	NO	NO	NEITHER	183.6
Split-Dalmacija	SPLIT, Prva gimnazija	SPL_Spl_PrvGim	GIMNAZIJA	1997-10-23	2015-10-27	18.0096	18-20	SPLIT	SPLIT-DALMACIJA	3	NO	NO	NEITHER	196.8
Split-Dalmacija	SPLIT, Prva gimnazija	SPL_Spl_PrvGim	GIMNAZIJA	1997-10-04	2015-10-27	18.0616	18-20	SPLIT	SPLIT-DALMACIJA	3	NO	NO	NEITHER	180.2
Split-Dalmacija	SPLIT, Prva gimnazija	SPL_Spl_PrvGim	GIMNAZIJA	1997-09-22	2015-10-27	18.0945	18-20	SPLIT	SPLIT-DALMACIJA	3	NO	NO	NEITHER	182.7
Split-Dalmacija	SPLIT, Prva gimnazija	SPL_Spl_PrvGim	GIMNAZIJA	1997-07-28	2015-10-27	18.2478	18-20	KLIŠ	SPLIT-DALMACIJA	1	NO	NO	NEITHER	187.8
Split-Dalmacija	SPLIT, Prva gimnazija	SPL_Spl_PrvGim	GIMNAZIJA	1997-06-01	2015-10-15	18.371	18-20	SPLIT	SPLIT-DALMACIJA	3	NO	NO	NEITHER	190
Split-Dalmacija	SPLIT, Prva gimnazija	SPL_Spl_PrvGim	GIMNAZIJA	1997-03-17	2015-10-27	18.6119	18-20	SPLIT	SPLIT-DALMACIJA	3	NO	NO	NEITHER	168.5
Split-Dalmacija	SPLIT, Prva gimnazija	SPL_Spl_PrvGim	GIMNAZIJA	1998-03-04	2015-10-15	17.6153	17	SPLIT	SPLIT-DALMACIJA	3	NO	YES	ONE PARENT	180.6
Split-Dalmacija	SPLIT, Prva gimnazija	SPL_Spl_PrvGim	GIMNAZIJA	1997-11-06	2015-10-15	17.9384	17	SPLIT	SPLIT-DALMACIJA	3	NO	YES	ONE PARENT	174.6
Split-Dalmacija	SPLIT, Prva gimnazija	SPL_Spl_PrvGim	GIMNAZIJA	1997-10-28	2015-10-27	17.9959	18-20	SPLIT	SPLIT-DALMACIJA	3	YES	NO	ONE PARENT	180
Split-Dalmacija	SPLIT, Prva gimnazija	SPL_Spl_PrvGim	GIMNAZIJA	1997-06-22	2015-10-15	18.3135	18-20	SPLIT	SPLIT-DALMACIJA	3	NO	YES	ONE PARENT	189
Split-Dalmacija	SPLIT, Prva gimnazija	SPL_Spl_PrvGim	GIMNAZIJA	1997-06-27	2015-10-27	18.3326	18-20	SPLIT	SPLIT-DALMACIJA	3	NO	YES	ONE PARENT	180.7
Split-Dalmacija	SPLIT, Prva gimnazija	SPL_Spl_PrvGim	GIMNAZIJA	1997-05-18	2015-10-27	18.4422	18-20	SPLIT	SPLIT-DALMACIJA	3	NO	YES	ONE PARENT	174
Split-Dalmacija	SPLIT, Prva gimnazija	SPL_Spl_PrvGim	GIMNAZIJA	1997-05-15	2015-10-27	18.4504	18-20	SOLIN	SPLIT-DALMACIJA	2	NO	YES	ONE PARENT	184.4
Split-Dalmacija	SPLIT, Prva gimnazija	SPL_Spl_PrvGim	GIMNAZIJA	1997-04-14	2015-10-15	18.5024	18-20	SPLIT	SPLIT-DALMACIJA	3	NO	YES	ONE PARENT	180.3
Split-Dalmacija	SPLIT, Prva gimnazija	SPL_Spl_PrvGim	GIMNAZIJA	1997-04-09	2015-10-15	18.5161	18-20	SPLIT	SPLIT-DALMACIJA	3	NO	YES	ONE PARENT	181.3
Split-Dalmacija	SPLIT, Škola za dizajn, grafiku i održivu gradnju	SPL_Spl_SDGG	OTHER	1998-09-27	2016-04-15	17.5496	17	SPLIT	SPLIT-DALMACIJA	3	YES	YES	BOTH PARENTS	168.8
Split-Dalmacija	SPLIT, Škola za dizajn, grafiku i održivu gradnju	SPL_Spl_SDGG	OTHER	1998-07-24	2016-04-15	17.7276	17	SPLIT	SPLIT-DALMACIJA	3	YES	YES	BOTH PARENTS	185.5
Split-Dalmacija	SPLIT, Škola za dizajn, grafiku i održivu gradnju	SPL_Spl_SDGG	OTHER	1998-06-18	2016-04-15	17.8261	17	BISTRO	LIKA-SENJ	1	YES	YES	BOTH PARENTS	177.4
Split-Dalmacija	SPLIT, Škola za dizajn, grafiku i održivu gradnju	SPL_Spl_SDGG	OTHER	1998-08-11	2016-04-15	17.6783	17	ŽRNOVNICA	SPLIT-DALMACIJA	1	NO	NO	NEITHER	178
Split-Dalmacija	SPLIT, Škola za dizajn, grafiku i održivu gradnju	SPL_Spl_SDGG	OTHER	1998-08-05	2016-04-15	17.6947	17	ŽRNOVNICA	SPLIT-DALMACIJA	1	NO	NO	NEITHER	182
Split-Dalmacija	SPLIT, Škola za dizajn, grafiku i održivu gradnju	SPL_Spl_SDGG	OTHER	1998-06-21	2016-04-15	17.8179	17	VRGORAC	SPLIT-DALMACIJA	1	NO	NO	NEITHER	170.6
Split-Dalmacija	SPLIT, Škola za dizajn, grafiku i održivu gradnju	SPL_Spl_SDGG	OTHER	1998-05-24	2016-04-15	17.8946	17	SPLIT	SPLIT-DALMACIJA	3	NO	NO	NEITHER	189.3
Split-Dalmacija	SPLIT, Škola za dizajn, grafiku i održivu gradnju	SPL_Spl_SDGG	OTHER	1998-02-10	2016-04-15	18.1766	18-20	KUČINE	SPLIT-DALMACIJA	1	NO	NO	NEITHER	187.5
Split-Dalmacija	SPLIT, Škola za dizajn, grafiku i održivu gradnju	SPL_Spl_SDGG	OTHER	1998-01-26	2016-04-15	18.2177	18-20	SPLIT	SPLIT-DALMACIJA	3	NO	NO	NEITHER	187
Split-Dalmacija	SPLIT, Škola za dizajn, grafiku i održivu gradnju	SPL_Spl_SDGG	OTHER	1997-12-08	2016-04-15	18.3518	18-20	SPLIT	SPLIT-DALMACIJA	3	NO	NO	NEITHER	178.9
Split-Dalmacija	SPLIT, Škola za dizajn, grafiku i održivu gradnju	SPL_Spl_SDGG	OTHER	1997-03-06	2016-04-15	19.1102	18-20	SPLIT	SPLIT-DALMACIJA	3	NO	NO	NEITHER	182.3
Split-Dalmacija	SPLIT, Škola za dizajn, grafiku i održivu gradnju	SPL_Spl_SDGG	OTHER	1998-09-21	2016-04-15	17.5661	17	SPLIT	SPLIT-DALMACIJA	3	YES	NO	ONE PARENT	175.6
Split-Dalmacija	SPLIT, Škola za dizajn, grafiku i održivu gradnju	SPL_Spl_SDGG	OTHER	1998-09-06	2016-04-15	17.6071	17	SPLIT	SPLIT-DALMACIJA	3	YES	NO	ONE PARENT	196.5
Split-Dalmacija	SPLIT, Škola za dizajn, grafiku i održivu gradnju	SPL_Spl_SDGG	OTHER	1998-08-14	2016-04-15	17.6701	17	SPLIT	SPLIT-DALMACIJA	3	YES	NO	ONE PARENT	187.8
Split-Dalmacija	SPLIT, Škola za dizajn, grafiku i održivu gradnju	SPL_Spl_SDGG	OTHER	1998-06-17	2016-04-15	17.8289	17	SPLIT	SPLIT-DALMACIJA	3	NO	YES	ONE PARENT	174.5
Split-Dalmacija	SPLIT, Škola za dizajn, grafiku i održivu gradnju	SPL_Spl_SDGG	OTHER	1998-05-13	2016-04-15	17.9247	17	VIS	SPLIT-DALMACIJA	1	NO	YES	ONE PARENT	186.6
Split-Dalmacija	SPLIT, Škola za dizajn, grafiku i održivu gradnju	SPL_Spl_SDGG	OTHER	1998-05-13	2016-04-15	17.9247	17	SPLIT	SPLIT-DALMACIJA	3	YES	NO	ONE PARENT	193.8
Split-Dalmacija	SPLIT, Škola za dizajn, grafiku i održivu gradnju	SPL_Spl_SDGG	OTHER	1998-04-28	2016-04-15	17.9658	17	SPLIT	SPLIT-DALMACIJA	3	NO	YES	ONE PARENT	175.5
Split-Dalmacija	SPLIT, Škola za dizajn, grafiku i održivu gradnju	SPL_Spl_SDGG	OTHER	1998-03-24	2016-04-15	18.0616	18-20	SOLIN	SPLIT-DALMACIJA	2	YES	NO	ONE PARENT	179.5
Split-Dalmacija	SPLIT, Tehnička škola za strojarstvo i mehatroniku	SPL_Spl_Teh	OTHER	1998-06-08	2016-05-16	17.9384	17	KAŠTELA	SPLIT-DALMACIJA	3	YES	YES	BOTH PARENTS	192.7
Split-Dalmacija	SPLIT, Tehnička škola za strojarstvo i mehatroniku	SPL_Spl_Teh	OTHER	1998-03-09	2016-05-16	18.1875	18-20	SPLIT	SPLIT-DALMACIJA	3	YES	YES	BOTH PARENTS	176
Split-Dalmacija	SPLIT, Tehnička škola za strojarstvo i mehatroniku	SPL_Spl_Teh	OTHER	1998-10-23	2016-05-16	17.5633	17	KAŠTELA	SPLIT-DALMACIJA	3	NO	NO	NEITHER	172.5
Split-Dalmacija	SPLIT, Tehnička škola za strojarstvo i mehatroniku	SPL_Spl_Teh	OTHER	1998-09-13	2016-05-16	17.6728	17	SPLIT	SPLIT-DALMACIJA	3	NO	NO	NEITHER	171.9
Split-Dalmacija	SPLIT, Tehnička škola za strojarstvo i mehatroniku	SPL_Spl_Teh	OTHER	1998-08-05	2016-05-16	17.7796	17	SPLIT	SPLIT-DALMACIJA	3	NO	NO	NEITHER	181.5
Split-Dalmacija	SPLIT, Tehnička škola za strojarstvo i mehatroniku	SPL_Spl_Teh	OTHER	1998-05-12	2016-05-16	18.0123	18-20	SOLIN	SPLIT-DALMACIJA	2	NO	NO	NEITHER	183.7
Split-Dalmacija	SPLIT, Tehnička škola za strojarstvo i mehatroniku	SPL_Spl_Teh	OTHER	1998-05-09	2016-05-16	18.0205	18-20	SOLIN	SPLIT-DALMACIJA	2	NO	NO	NEITHER	181.7
Split-Dalmacija	SPLIT, Tehnička škola za strojarstvo i mehatroniku	SPL_Spl_Teh	OTHER	1998-05-04	2016-05-16	18.0342	18-20	SPLIT	SPLIT-DALMACIJA	3	NO	NO	NEITHER	192.5
Split-Dalmacija	SPLIT, Tehnička škola za strojarstvo i mehatroniku	SPL_Spl_Teh	OTHER	1997-07-18	2016-05-16	18.8282	18-20	SINJ	SPLIT-DALMACIJA	2	NO	NO	NEITHER	178.8
Split-Dalmacija	SPLIT, Tehnička škola za strojarstvo i mehatroniku	SPL_Spl_Teh	OTHER	1998-11-15	2016-05-16	17.5003	17	SPLIT	SPLIT-DALMACIJA	3	YES	NO	ONE PARENT	178.9
Split-Dalmacija	SPLIT, Tehnička škola za strojarstvo i mehatroniku	SPL_Spl_Teh	OTHER	1998-10-29	2016-05-16	17.5469	17	SPLIT	SPLIT-DALMACIJA	3	NO	YES	ONE PARENT	189
Split-Dalmacija	SPLIT, Tehnička škola za strojarstvo i mehatroniku	SPL_Spl_Teh	OTHER	1998-10-19	2016-05-16	17.5743	17	SPLIT	SPLIT-DALMACIJA	3	NO	YES	ONE PARENT	185.1
Split-Dalmacija	SPLIT, Tehnička škola za strojarstvo i mehatroniku	SPL_Spl_Teh	OTHER	1998-08-20	2016-05-16	17.7385	17	SPLIT	SPLIT-DALMACIJA	3	YES	NO	ONE PARENT	185.3
Split-Dalmacija	SPLIT, Tehnička škola za strojarstvo i mehatroniku	SPL_Spl_Teh	OTHER	1998-08-14	2016-05-16	17.755	17	SPLIT	SPLIT-DALMACIJA	3	YES	NO	ONE PARENT	184.5
Split-Dalmacija	SPLIT, Zdravstvena	SPL_Spl_Zdrav	OTHER	1999-01-19	2017-02-09	18.0589	18-20	SPLIT	SPLIT-DALMACIJA	3	unavailable	unavailable	unavailable	188.5
Split-Dalmacija	SPLIT, Zdravstvena	SPL_Spl_Zdrav	OTHER	1998-11-28	2017-02-09	18.2012	18-20	SPLIT	SPLIT-DALMACIJA	3	unavailable	unavailable	unavailable	186
Split-Dalmacija	SPLIT, Zdravstvena	SPL_Spl_Zdrav	OTHER	1998-09-25	2017-02-09	18.3765	18-20	SPLIT	SPLIT-DALMACIJA	3	unavailable	unavailable	unavailable	175.1
Split-Dalmacija	SPLIT, Zdravstvena	SPL_Spl_Zdrav	OTHER	1998-07-16	2017-02-09	18.5708	18-20	KAŠTELA	SPLIT-DALMACIJA	3	unavailable	unavailable	unavailable	179.5
Split-Dalmacija	SPLIT, Zdravstvena	SPL_Spl_Zdrav	OTHER	1998-06-07	2017-02-09	18.6776	18-20	TROGIR	SPLIT-DALMACIJA	2	unavailable	unavailable	unavailable	189.4
Split-Dalmacija	SPLIT, Zdravstvena	SPL_Spl_Zdrav	OTHER	1998-05-16	2017-02-09	18.7379	18-20	SPLIT	SPLIT-DALMACIJA	3	unavailable	unavailable	unavailable	182.5
Split-Dalmacija	SPLIT, Zdravstvena	SPL_Spl_Zdrav	OTHER	1998-05-13	2017-02-09	18.7461	18-20	SPLIT	SPLIT-DALMACIJA	3	unavailable	unavailable	unavailable	180.5
Split-Dalmacija	SPLIT, Zdravstvena	SPL_Spl_Zdrav	OTHER	1998-03-23	2017-02-09	18.8857	18-20	SPLIT	SPLIT-DALMACIJA	3	unavailable	unavailable	unavailable	183
Split-Dalmacija	SPLIT, Zdravstvena	SPL_Spl_Zdrav	OTHER	1997-06-22	2017-02-09	19.6359	18-20	TROGIR	SPLIT-DALMACIJA	2	unavailable	unavailable	unavailable	179.5
Split-Dalmacija	SPLIT, Zdravstvena	SPL_Spl_Zdrav	OTHER	1997-04-12	2017-02-09	19.8303	18-20	NEORIČ	SPLIT-DALMACIJA	1	unavailable	unavailable	unavailable	191.2
Split-Dalmacija	TROGIR, SŠ Ivana Lučića	SPL_Trog_Sred	MIXED	1998-04-03	2015-10-27	17.5661	17	TROGIR	SPLIT-DALMACIJA	2	YES	YES	BOTH PARENTS	196.6
Split-Dalmacija	TROGIR, SŠ Ivana Lučića	SPL_Trog_Sred	MIXED	1998-01-27	2015-10-27	17.7467	17	TROGIR	SPLIT-DALMACIJA	2	YES	YES	BOTH PARENTS	182.7
Split-Dalmacija	TROGIR, SŠ Ivana Lučića	SPL_Trog_Sred	MIXED	1998-04-24	2015-10-27	17.5086	17	TROGIR	SPLIT-DALMACIJA	2	NO	NO	NEITHER	182.7
Split-Dalmacija	TROGIR, SŠ Ivana Lučića	SPL_Trog_Sred	MIXED	1998-02-16	2015-10-27	17.692	17	KAŠTELA	SPLIT-DALMACIJA	3	NO	NO	NEITHER	192.6
Split-Dalmacija	TROGIR, SŠ Ivana Lučića	SPL_Trog_Sred	MIXED	1998-01-23	2015-10-27	17.7577	17	SEGET VRANJICA	SPLIT-DALMACIJA	1	NO	NO	NEITHER	186.7
Split-Dalmacija	TROGIR, SŠ Ivana Lučića	SPL_Trog_Sred	MIXED	1998-01-23	2015-10-27	17.7577	17	TROGIR	SPLIT-DALMACIJA	2	NO	NO	NEITHER	182.3
Split-Dalmacija	TROGIR, SŠ Ivana Lučića	SPL_Trog_Sred	MIXED	1998-01-06	2015-10-27	17.8042	17	TROGIR	SPLIT-DALMACIJA	2	NO	NO	NEITHER	187.5
Split-Dalmacija	TROGIR, SŠ Ivana Lučića	SPL_Trog_Sred	MIXED	1997-12-18	2015-10-27	17.8563	17	OKRUG GORNJI	SPLIT-DALMACIJA	1	NO	NO	NEITHER	195.6
Split-Dalmacija	TROGIR, SŠ Ivana Lučića	SPL_Trog_Sred	MIXED	1997-11-15	2015-10-27	17.9466	17	KAŠTELA	SPLIT-DALMACIJA	3	NO	NO	NEITHER	182.3
Split-Dalmacija	TROGIR, SŠ Ivana Lučića	SPL_Trog_Sred	MIXED	1997-10-06	2015-10-27	18.0561	18-20	KAŠTELA	SPLIT-DALMACIJA	3	NO	NO	NEITHER	188.7
Split-Dalmacija	TROGIR, SŠ Ivana Lučića	SPL_Trog_Sred	MIXED	1997-09-26	2015-10-27	18.0835	18-20	SEGET DONJI	SPLIT-DALMACIJA	1	NO	NO	NEITHER	168.6
Split-Dalmacija	TROGIR, SŠ Ivana Lučića	SPL_Trog_Sred	MIXED	1997-09-18	2015-10-27	18.1054	18-20	KAŠTELA	SPLIT-DALMACIJA	3	NO	NO	NEITHER	182
Split-Dalmacija	TROGIR, SŠ Ivana Lučića	SPL_Trog_Sred	MIXED	1997-09-07	2015-10-27	18.1355	18-20	KAŠTELA	SPLIT-DALMACIJA	3	NO	NO	NEITHER	181.4
Split-Dalmacija	TROGIR, SŠ Ivana Lučića	SPL_Trog_Sred	MIXED	1997-09-03	2015-10-27	18.1465	18-20	TROGIR	SPLIT-DALMACIJA	2	NO	NO	NEITHER	179.5
Split-Dalmacija	TROGIR, SŠ Ivana Lučića	SPL_Trog_Sred	MIXED	1997-07-20	2015-10-27	18.2697	18-20	TROGIR	SPLIT-DALMACIJA	2	NO	NO	NEITHER	183
Split-Dalmacija	TROGIR, SŠ Ivana Lučića	SPL_Trog_Sred	MIXED	1997-07-18	2015-10-27	18.2752	18-20	TROGIR	SPLIT-DALMACIJA	2	NO	NO	NEITHER	181.9
Split-Dalmacija	TROGIR, SŠ Ivana Lučića	SPL_Trog_Sred	MIXED	1997-06-12	2015-10-27	18.3737	18-20	OKRUG GORNJI	SPLIT-DALMACIJA	1	NO	NO	NEITHER	187.1
Split-Dalmacija	TROGIR, SŠ Ivana Lučića	SPL_Trog_Sred	MIXED	1997-05-30	2015-10-27	18.4093	18-20	OKRUG GORNJI	SPLIT-DALMACIJA	1	NO	NO	NEITHER	184
Split-Dalmacija	TROGIR, SŠ Ivana Lučića	SPL_Trog_Sred	MIXED	1997-05-28	2015-10-27	18.4148	18-20	SEGET VRANJICA	SPLIT-DALMACIJA	1	NO	NO	NEITHER	181.2
Split-Dalmacija	TROGIR, SŠ Ivana Lučića	SPL_Trog_Sred	MIXED	1997-05-22	2015-10-27	18.4312	18-20	OKRUG GORNJI	SPLIT-DALMACIJA	1	NO	NO	NEITHER	181.9
Split-Dalmacija	TROGIR, SŠ Ivana Lučića	SPL_Trog_Sred	MIXED	1997-05-13	2015-10-27	18.4559	18-20	SEGET DONJI	SPLIT-DALMACIJA	1	NO	NO	NEITHER	175.5
Split-Dalmacija	TROGIR, SŠ Ivana Lučića	SPL_Trog_Sred	MIXED	1997-05-11	2015-10-27	18.4613	18-20	KAŠTELA	SPLIT-DALMACIJA	3	NO	NO	NEITHER	189.2
Split-Dalmacija	TROGIR, SŠ Ivana Lučića	SPL_Trog_Sred	MIXED	1997-05-05	2015-10-27	18.4778	18-20	TROGIR	SPLIT-DALMACIJA	2	NO	NO	NEITHER	179.7
Split-Dalmacija	TROGIR, SŠ Ivana Lučića	SPL_Trog_Sred	MIXED	1997-04-30	2015-10-27	18.4914	18-20	KAŠTELA	SPLIT-DALMACIJA	3	NO	NO	NEITHER	195.4
Split-Dalmacija	TROGIR, SŠ Ivana Lučića	SPL_Trog_Sred	MIXED	1998-02-23	2015-10-27	17.6728	17	TROGIR	SPLIT-DALMACIJA	2	YES	NO	ONE PARENT	178.4
Split-Dalmacija	TROGIR, SŠ Ivana Lučića	SPL_Trog_Sred	MIXED	1997-12-20	2015-10-27	17.8508	17	PLANO	SPLIT-DALMACIJA	1	NO	YES	ONE PARENT	178.2
Split-Dalmacija	TROGIR, SŠ Ivana Lučića	SPL_Trog_Sred	MIXED	1997-09-21	2015-10-27	18.0972	18-20	LJUBITOVICA	SPLIT-DALMACIJA	1	YES	NO	ONE PARENT	188.4
Split-Dalmacija	TROGIR, SŠ Ivana Lučića	SPL_Trog_Sred	MIXED	1997-08-13	2015-10-27	18.204	18-20	OKRUG GORNJI	SPLIT-DALMACIJA	1	NO	YES	ONE PARENT	184.2
Split-Dalmacija	TROGIR, SŠ Ivana Lučića	SPL_Trog_Sred	MIXED	1997-05-31	2015-10-27	18.4066	18-20	TROGIR	SPLIT-DALMACIJA	2	YES	NO	ONE PARENT	190.1
Šibenik-Knin	DRNIŠ, Srednja škola I. Meštrovića	SIB_Drn_Sred	MIXED	1998-05-27	2016-03-07	17.7796	17	TRBOUNJE	ŠIBENIK-KNIN	1	NO	NO	NEITHER	179.3
Šibenik-Knin	DRNIŠ, Srednja škola I. Meštrovića	SIB_Drn_Sred	MIXED	1998-05-27	2016-03-07	17.7796	17	TRBOUNJE	ŠIBENIK-KNIN	1	NO	NO	NEITHER	179.3
Šibenik-Knin	DRNIŠ, Srednja škola I. Meštrovića	SIB_Drn_Sred	MIXED	1998-03-02	2016-03-07	18.0151	18-20	OKLAJ	ŠIBENIK-KNIN	1	NO	NO	NEITHER	198.2
Šibenik-Knin	DRNIŠ, Srednja škola I. Meštrovića	SIB_Drn_Sred	MIXED	1998-03-02	2016-03-07	18.0151	18-20	OKLAJ	ŠIBENIK-KNIN	1	NO	NO	NEITHER	198.2
Šibenik-Knin	DRNIŠ, Srednja škola I. Meštrovića	SIB_Drn_Sred	MIXED	1997-12-10	2016-03-07	18.2396	18-20	RADONIĆ	ŠIBENIK-KNIN	1	NO	NO	NEITHER	187.7
Šibenik-Knin	DRNIŠ, Srednja škola I. Meštrovića	SIB_Drn_Sred	MIXED	1997-12-10	2016-03-07	18.2396	18-20	RADONIĆ	ŠIBENIK-KNIN	1	NO	NO	NEITHER	187.7
Šibenik-Knin	DRNIŠ, Srednja škola I. Meštrovića	SIB_Drn_Sred	MIXED	1997-12-09	2016-03-07	18.2423	18-20	DRNIŠ	ŠIBENIK-KNIN	1	NO	NO	NEITHER	167.2
Šibenik-Knin	DRNIŠ, Srednja škola I. Meštrovića	SIB_Drn_Sred	MIXED	1997-12-07	2016-03-07	18.2478	18-20	KNIN	ŠIBENIK-KNIN	2	NO	NO	NEITHER	180.8
Šibenik-Knin	DRNIŠ, Srednja škola I. Meštrovića	SIB_Drn_Sred	MIXED	1997-12-07	2016-03-07	18.2478	18-20	KNIN	ŠIBENIK-KNIN	2	NO	NO	NEITHER	174.3
Šibenik-Knin	DRNIŠ, Srednja škola I. Meštrovića	SIB_Drn_Sred	MIXED	1997-12-07	2016-03-07	18.2478	18-20	KNIN	ŠIBENIK-KNIN	2	NO	NO	NEITHER	180.8
Šibenik-Knin	DRNIŠ, Srednja škola I. Meštrovića	SIB_Drn_Sred	MIXED	1997-12-07	2016-03-07	18.2478	18-20	KNIN	ŠIBENIK-KNIN	2	NO	NO	NEITHER	174.3
Šibenik-Knin	DRNIŠ, Srednja škola I. Meštrovića	SIB_Drn_Sred	MIXED	1997-11-21	2016-03-07	18.2916	18-20	DRNIŠ	ŠIBENIK-KNIN	1	NO	NO	NEITHER	188.3
Šibenik-Knin	DRNIŠ, Srednja škola I. Meštrovića	SIB_Drn_Sred	MIXED	1997-11-21	2016-03-07	18.2916	18-20	DRNIŠ	ŠIBENIK-KNIN	1	NO	NO	NEITHER	188.3
Šibenik-Knin	DRNIŠ, Srednja škola I. Meštrovića	SIB_Drn_Sred	MIXED	1997-10-20	2016-03-07	18.3792	18-20	ŠIRITOVCI	ŠIBENIK-KNIN	1	NO	NO	NEITHER	178.3
Šibenik-Knin	DRNIŠ, Srednja škola I. Meštrovića	SIB_Drn_Sred	MIXED	1997-10-16	2016-03-07	18.3901	18-20	BOGOTIĆI	ŠIBENIK-KNIN	1	NO	NO	NEITHER	188.8
Šibenik-Knin	DRNIŠ, Srednja škola I. Meštrovića	SIB_Drn_Sred	MIXED	1997-10-10	2016-03-07	18.4066	18-20	GRADAC	SPLIT-DALMACIJA	1	NO	NO	NEITHER	194.8
Šibenik-Knin	DRNIŠ, Srednja škola I. Meštrovića	SIB_Drn_Sred	MIXED	1997-09-26	2016-03-07	18.4449	18-20	KLJUČ	ŠIBENIK-KNIN	1	NO	NO	NEITHER	184.4
Šibenik-Knin	DRNIŠ, Srednja škola I. Meštrovića	SIB_Drn_Sred	MIXED	1997-08-29	2016-03-07	18.5216	18-20	DRNIŠ	ŠIBENIK-KNIN	1	NO	NO	NEITHER	191.6
Šibenik-Knin	DRNIŠ, Srednja škola I. Meštrovića	SIB_Drn_Sred	MIXED	1997-08-29	2016-03-07	18.5216	18-20	DRNIŠ	ŠIBENIK-KNIN	1	NO	NO	NEITHER	191.6
Šibenik-Knin	DRNIŠ, Srednja škola I. Meštrovića	SIB_Drn_Sred	MIXED	1997-08-05	2016-03-07	18.5873	18-20	RAZVOĐE	ŠIBENIK-KNIN	1	NO	NO	NEITHER	182.6
Šibenik-Knin	DRNIŠ, Srednja škola I. Meštrovića	SIB_Drn_Sred	MIXED	1997-07-23	2016-03-07	18.6229	18-20	PAKOVO SELO	ŠIBENIK-KNIN	1	NO	NO	NEITHER	182.6
Šibenik-Knin	DRNIŠ, Srednja škola I. Meštrovića	SIB_Drn_Sred	MIXED	1997-07-20	2016-03-07	18.6311	18-20	OKLAJ	ŠIBENIK-KNIN	1	NO	NO	NEITHER	182.5
Šibenik-Knin	DRNIŠ, Srednja škola I. Meštrovića	SIB_Drn_Sred	MIXED	1997-07-20	2016-03-07	18.6311	18-20	OKLAJ	ŠIBENIK-KNIN	1	NO	NO	NEITHER	182.5
Šibenik-Knin	DRNIŠ, Srednja škola I. Meštrovića	SIB_Drn_Sred	MIXED	1997-07-17	2016-03-07	18.6393	18-20	DRNIŠ	ŠIBENIK-KNIN	1	NO	NO	NEITHER	184.7
Šibenik-Knin	DRNIŠ, Srednja škola I. Meštrovića	SIB_Drn_Sred	MIXED	1997-07-08	2016-03-07	18.6639	18-20	MRATOVO	ŠIBENIK-KNIN	1	NO	NO	NEITHER	182.1
Šibenik-Knin	DRNIŠ, Srednja škola I. Meštrovića	SIB_Drn_Sred	MIXED	1997-07-03	2016-03-07	18.6776	18-20	MILJEVCI	ŠIBENIK-KNIN	1	NO	NO	NEITHER	177.7
Šibenik-Knin	DRNIŠ, Srednja škola I. Meštrovića	SIB_Drn_Sred	MIXED	1997-06-11	2016-03-07	18.7379	18-20	ŠIRITOVCI	ŠIBENIK-KNIN	1	NO	NO	NEITHER	170.6
Šibenik-Knin	DRNIŠ, Srednja škola I. Meštrovića	SIB_Drn_Sred	MIXED	1997-06-11	2016-03-07	18.7379	18-20	ŠIRITOVCI	ŠIBENIK-KNIN	1	NO	NO	NEITHER	170.6
Šibenik-Knin	DRNIŠ, Srednja škola I. Meštrovića	SIB_Drn_Sred	MIXED	1997-06-04	2016-03-07	18.757	18-20	DRNIŠ	ŠIBENIK-KNIN	1	NO	NO	NEITHER	189.6
Šibenik-Knin	DRNIŠ, Srednja škola I. Meštrovića	SIB_Drn_Sred	MIXED	1997-06-04	2016-03-07	18.757	18-20	DRNIŠ	ŠIBENIK-KNIN	1	NO	NO	NEITHER	189.6
Šibenik-Knin	DRNIŠ, Srednja škola I. Meštrovića	SIB_Drn_Sred	MIXED	1997-05-04	2016-03-07	18.8419	18-20	RUŽIĆ	ŠIBENIK-KNIN	1	NO	NO	NEITHER	187.5
Šibenik-Knin	DRNIŠ, Srednja škola I. Meštrovića	SIB_Drn_Sred	MIXED	1997-05-04	2016-03-07	18.8419	18-20	RUŽIĆ	ŠIBENIK-KNIN	1	NO	NO	NEITHER	187.5
Šibenik-Knin	DRNIŠ, Srednja škola I. Meštrovića	SIB_Drn_Sred	MIXED	1998-03-17	2016-03-07	17.974	17	OKLAJ	ŠIBENIK-KNIN	1	NO	YES	ONE PARENT	184.2
Šibenik-Knin	DRNIŠ, Srednja škola I. Meštrovića	SIB_Drn_Sred	MIXED	1998-03-17	2016-03-07	17.974	17	OKLAJ	ŠIBENIK-KNIN	1	NO	YES	ONE PARENT	184.2
Šibenik-Knin	DRNIŠ, Srednja škola I. Meštrovića	SIB_Drn_Sred	MIXED	1997-12-31	2016-03-07	18.1821	18-20	TRBOUNJE	ŠIBENIK-KNIN	1	NO	YES	ONE PARENT	183.5
Šibenik-Knin	DRNIŠ, Srednja škola I. Meštrovića	SIB_Drn_Sred	MIXED	1997-12-20	2016-03-07	18.2122	18-20	DRNIŠ	ŠIBENIK-KNIN	1	NO	YES	ONE PARENT	184.5
Šibenik-Knin	DRNIŠ, Srednja škola I. Meštrovića	SIB_Drn_Sred	MIXED	1997-12-20	2016-03-07	18.2122	18-20	DRNIŠ	ŠIBENIK-KNIN	1	NO	YES	ONE PARENT	184.5
Šibenik-Knin	DRNIŠ, Srednja škola I. Meštrovića	SIB_Drn_Sred	MIXED	1997-09-22	2016-03-07	18.4559	18-20	DRNIŠ	ŠIBENIK-KNIN	1	YES	NO	ONE PARENT	186.6
Šibenik-Knin	DRNIŠ, Srednja škola I. Meštrovića	SIB_Drn_Sred	MIXED	1997-09-22	2016-03-07	18.4559	18-20	DRNIŠ	ŠIBENIK-KNIN	1	YES	NO	ONE PARENT	186.6
Šibenik-Knin	DRNIŠ, Srednja škola I. Meštrovića	SIB_Drn_Sred	MIXED	1997-08-06	2016-03-07	18.5845	18-20	DRNIŠ	ŠIBENIK-KNIN	1	YES	NO	ONE PARENT	203.4
Šibenik-Knin	DRNIŠ, Srednja škola I. Meštrovića	SIB_Drn_Sred	MIXED	1997-01-22	2016-03-07	19.1211	18-20	DRNIŠ	ŠIBENIK-KNIN	1	YES	NO	ONE PARENT	181.4
Šibenik-Knin	DRNIŠ, Srednja škola I. Meštrovića	SIB_Drn_Sred	MIXED	1997-01-22	2016-03-07	19.1211	18-20	DRNIŠ	ŠIBENIK-KNIN	1	YES	NO	ONE PARENT	181.4
Šibenik-Knin	KNIN, Srednja strukovna škola Kralja Zvonimira	SIB_Knin_Struk	OTHER	1998-02-22	2016-03-07	18.037	18-20	STRMICA	ŠIBENIK-KNIN	1	NO	NO	NEITHER	195.4
Šibenik-Knin	KNIN, Srednja strukovna škola Kralja Zvonimira	SIB_Knin_Struk	OTHER	1998-01-17	2016-03-07	18.1355	18-20	KNIN	ŠIBENIK-KNIN	2	NO	NO	NEITHER	188.3
Šibenik-Knin	KNIN, Srednja strukovna škola Kralja Zvonimira	SIB_Knin_Struk	OTHER	1998-01-01	2016-03-07	18.1793	18-20	KNIN	ŠIBENIK-KNIN	2	NO	NO	NEITHER	178.1
Šibenik-Knin	KNIN, Srednja strukovna škola Kralja Zvonimira	SIB_Knin_Struk	OTHER	1997-12-24	2016-03-07	18.2012	18-20	KISTANJE	ŠIBENIK-KNIN	1	NO	NO	NEITHER	185.8
Šibenik-Knin	KNIN, Srednja strukovna škola Kralja Zvonimira	SIB_Knin_Struk	OTHER	1997-12-10	2016-03-07	18.2396	18-20	KNIN	ŠIBENIK-KNIN	2	NO	NO	NEITHER	186.1
Šibenik-Knin	KNIN, Srednja strukovna škola Kralja Zvonimira	SIB_Knin_Struk	OTHER	1997-12-09	2016-03-07	18.2423	18-20	KNIN	ŠIBENIK-KNIN	2	NO	NO	NEITHER	176.1
Šibenik-Knin	KNIN, Srednja strukovna škola Kralja Zvonimira	SIB_Knin_Struk	OTHER	1997-11-13	2016-03-07	18.3135	18-20	KNIN	ŠIBENIK-KNIN	2	NO	NO	NEITHER	174.4
Šibenik-Knin	KNIN, Srednja strukovna škola Kralja Zvonimira	SIB_Knin_Struk	OTHER	1997-10-27	2016-03-07	18.36	18-20	KNIN	ŠIBENIK-KNIN	2	NO	NO	NEITHER	177
Šibenik-Knin	KNIN, Srednja strukovna škola Kralja Zvonimira	SIB_Knin_Struk	OTHER	1997-10-27	2016-03-07	18.36	18-20	KNIN	ŠIBENIK-KNIN	2	NO	NO	NEITHER	184.3
Šibenik-Knin	KNIN, Srednja strukovna škola Kralja Zvonimira	SIB_Knin_Struk	OTHER	1997-10-16	2016-03-07	18.3901	18-20	KISTANJE	ŠIBENIK-KNIN	1	NO	NO	NEITHER	175.2
Šibenik-Knin	KNIN, Srednja strukovna škola Kralja Zvonimira	SIB_Knin_Struk	OTHER	1997-09-28	2016-03-07	18.4394	18-20	KNIN	ŠIBENIK-KNIN	2	NO	NO	NEITHER	190.3
Šibenik-Knin	KNIN, Srednja strukovna škola Kralja Zvonimira	SIB_Knin_Struk	OTHER	1997-08-23	2016-03-07	18.538	18-20	KNIN	ŠIBENIK-KNIN	2	NO	NO	NEITHER	187.3
Šibenik-Knin	KNIN, Srednja strukovna škola Kralja Zvonimira	SIB_Knin_Struk	OTHER	1997-08-06	2016-03-07	18.5845	18-20	KNIN	ŠIBENIK-KNIN	2	NO	NO	NEITHER	169
Šibenik-Knin	KNIN, Srednja strukovna škola Kralja Zvonimira	SIB_Knin_Struk	OTHER	1997-07-21	2016-03-07	18.6283	18-20	KNIN	ŠIBENIK-KNIN	2	NO	NO	NEITHER	180.5
Šibenik-Knin	KNIN, Srednja strukovna škola Kralja Zvonimira	SIB_Knin_Struk	OTHER	1997-07-17	2016-03-07	18.6393	18-20	KISTANJE	ŠIBENIK-KNIN	1	NO	NO	NEITHER	184.2
Šibenik-Knin	KNIN, Srednja strukovna škola Kralja Zvonimira	SIB_Knin_Struk	OTHER	1997-06-25	2016-03-07	18.6995	18-20	KNIN	ŠIBENIK-KNIN	2	NO	NO	NEITHER	174.9
Šibenik-Knin	KNIN, Srednja strukovna škola Kralja Zvonimira	SIB_Knin_Struk	OTHER	1997-06-20	2016-03-07	18.7132	18-20	KNIN	ŠIBENIK-KNIN	2	NO	NO	NEITHER	179.5
Šibenik-Knin	KNIN, Srednja strukovna škola Kralja Zvonimira	SIB_Knin_Struk	OTHER	1997-05-18	2016-03-07	18.8036	18-20	KNIN	ŠIBENIK-KNIN	2	NO	NO	NEITHER	177.3
Šibenik-Knin	KNIN, Srednja strukovna škola Kralja Zvonimira	SIB_Knin_Struk	OTHER	31.2.1997	2016-03-07	19.1	18-20	KNIN	ŠIBENIK-KNIN	2	NO	NO	NEITHER	185.3
Šibenik-Knin	KNIN, Srednja strukovna škola Kralja Zvonimira	SIB_Knin_Struk	OTHER	1998-02-14	2016-03-07	18.0589	18-20	KNIN	ŠIBENIK-KNIN	2	YES	NO	ONE PARENT	187
Šibenik-Knin	KNIN, Srednja strukovna škola Kralja Zvonimira	SIB_Knin_Struk	OTHER	1997-10-19	2016-03-07	18.3819	18-20	KNIN	ŠIBENIK-KNIN	2	YES	NO	ONE PARENT	181.6
Šibenik-Knin	KNIN, Srednja strukovna škola Kralja Zvonimira	SIB_Knin_Struk	OTHER	1997-10-13	2016-03-07	18.3984	18-20	KNIN	ŠIBENIK-KNIN	2	NO	YES	ONE PARENT	179.2
Šibenik-Knin	KNIN, Srednja strukovna škola Kralja Zvonimira	SIB_Knin_Struk	OTHER	1997-09-24	2016-03-07	18.4504	18-20	KNIN	ŠIBENIK-KNIN	2	NO	YES	ONE PARENT	177.8
Šibenik-Knin	KNIN, Srednja strukovna škola Kralja Zvonimira	SIB_Knin_Struk	OTHER	1997-08-16	2016-03-07	18.5572	18-20	KISTANJE	ŠIBENIK-KNIN	1	YES	NO	ONE PARENT	183.7
Šibenik-Knin	KNIN, Srednja strukovna škola Kralja Zvonimira	SIB_Knin_Struk	OTHER	1997-02-01	2016-03-07	19.0938	18-20	KNIN	ŠIBENIK-KNIN	2	YES	NO	ONE PARENT	181.3
Šibenik-Knin	KNIN, Srednja škola Lovre Montija	SIB_Knin_Sred	MIXED	1997-03-06	2016-03-07	19.0034	18-20	KNIN	ŠIBENIK-KNIN	2	YES	YES	BOTH PARENTS	185.9
Šibenik-Knin	KNIN, Srednja škola Lovre Montija	SIB_Knin_Sred	MIXED	1998-02-25	2016-03-07	18.0287	18-20	KNIN	ŠIBENIK-KNIN	2	NO	NO	NEITHER	189.3
Šibenik-Knin	KNIN, Srednja škola Lovre Montija	SIB_Knin_Sred	MIXED	1998-01-15	2016-03-07	18.141	18-20	GOLUBIĆ	ŠIBENIK-KNIN	1	NO	NO	NEITHER	193.6
Šibenik-Knin	KNIN, Srednja škola Lovre Montija	SIB_Knin_Sred	MIXED	1997-11-07	2016-03-07	18.3299	18-20	KNIN	ŠIBENIK-KNIN	2	NO	NO	NEITHER	184.8
Šibenik-Knin	KNIN, Srednja škola Lovre Montija	SIB_Knin_Sred	MIXED	1997-09-18	2016-03-07	18.4668	18-20	KNIN	ŠIBENIK-KNIN	2	NO	NO	NEITHER	179.1
Šibenik-Knin	KNIN, Srednja škola Lovre Montija	SIB_Knin_Sred	MIXED	1997-09-02	2016-03-07	18.5106	18-20	KNIN	ŠIBENIK-KNIN	2	NO	NO	NEITHER	185.9
Šibenik-Knin	KNIN, Srednja škola Lovre Montija	SIB_Knin_Sred	MIXED	1997-08-27	2016-03-07	18.527	18-20	KNIN	ŠIBENIK-KNIN	2	NO	NO	NEITHER	188.8
Šibenik-Knin	KNIN, Srednja škola Lovre Montija	SIB_Knin_Sred	MIXED	1997-06-19	2016-03-07	18.7159	18-20	KNIN	ŠIBENIK-KNIN	2	NO	NO	NEITHER	173
Šibenik-Knin	KNIN, Srednja škola Lovre Montija	SIB_Knin_Sred	MIXED	1997-06-10	2016-03-07	18.7406	18-20	KNIN	ŠIBENIK-KNIN	2	NO	NO	NEITHER	176.8
Šibenik-Knin	KNIN, Srednja škola Lovre Montija	SIB_Knin_Sred	MIXED	1997-03-13	2016-03-07	18.9843	18-20	KNIN	ŠIBENIK-KNIN	2	NO	NO	NEITHER	181.8
Šibenik-Knin	KNIN, Srednja škola Lovre Montija	SIB_Knin_Sred	MIXED	1996-08-02	2016-03-07	19.5948	18-20	KNIN	ŠIBENIK-KNIN	2	NO	NO	NEITHER	182.5
Šibenik-Knin	KNIN, Srednja škola Lovre Montija	SIB_Knin_Sred	MIXED	1998-03-22	2016-03-07	17.9603	17	KNIN	ŠIBENIK-KNIN	2	NO	YES	ONE PARENT	195.7
Šibenik-Knin	KNIN, Srednja škola Lovre Montija	SIB_Knin_Sred	MIXED	1997-11-10	2016-03-07	18.3217	18-20	KNIN	ŠIBENIK-KNIN	2	YES	NO	ONE PARENT	187.8
Šibenik-Knin	KNIN, Srednja škola Lovre Montija	SIB_Knin_Sred	MIXED	1997-05-22	2016-03-07	18.7926	18-20	KNIN	ŠIBENIK-KNIN	2	NO	YES	ONE PARENT	184.5
Šibenik-Knin	ŠIBENIK, Ekonomska	SIB_Sib_Ekon	OTHER	1998-04-23	2016-03-07	17.8727	17	ZABLAĆE	ŠIBENIK-KNIN	1	YES	YES	BOTH PARENTS	187.3
Šibenik-Knin	ŠIBENIK, Ekonomska	SIB_Sib_Ekon	OTHER	1997-10-03	2016-03-07	18.4257	18-20	ŠIBENIK	ŠIBENIK-KNIN	3	YES	YES	BOTH PARENTS	186
Šibenik-Knin	ŠIBENIK, Ekonomska	SIB_Sib_Ekon	OTHER	1997-04-26	2016-03-07	18.8638	18-20	ŠIBENIK	ŠIBENIK-KNIN	3	YES	YES	BOTH PARENTS	176.2
Šibenik-Knin	ŠIBENIK, Ekonomska	SIB_Sib_Ekon	OTHER	1998-08-27	2016-03-07	17.5277	17	BILICE	ŠIBENIK-KNIN	1	NO	NO	NEITHER	185.3
Šibenik-Knin	ŠIBENIK, Ekonomska	SIB_Sib_Ekon	OTHER	1998-08-15	2016-03-07	17.5606	17	ŠIBENIK	ŠIBENIK-KNIN	3	NO	NO	NEITHER	188.4
Šibenik-Knin	ŠIBENIK, Ekonomska	SIB_Sib_Ekon	OTHER	1998-05-26	2016-03-07	17.7823	17	DANILO	ZADAR	1	NO	NO	NEITHER	185.9
Šibenik-Knin	ŠIBENIK, Ekonomska	SIB_Sib_Ekon	OTHER	1998-04-18	2016-03-07	17.8864	17	ŠIBENIK	ŠIBENIK-KNIN	3	NO	NO	NEITHER	192.9
Šibenik-Knin	ŠIBENIK, Ekonomska	SIB_Sib_Ekon	OTHER	1998-03-29	2016-03-07	17.9411	17	ŠIBENIK	ŠIBENIK-KNIN	3	NO	NO	NEITHER	178.4
Šibenik-Knin	ŠIBENIK, Ekonomska	SIB_Sib_Ekon	OTHER	1998-03-03	2016-03-07	18.0123	18-20	DUBRAVA	SPLIT-DALMACIJA	1	NO	NO	NEITHER	180
Šibenik-Knin	ŠIBENIK, Ekonomska	SIB_Sib_Ekon	OTHER	1998-02-10	2016-03-07	18.0698	18-20	RADONIĆ	ŠIBENIK-KNIN	1	NO	NO	NEITHER	186.3
Šibenik-Knin	ŠIBENIK, Ekonomska	SIB_Sib_Ekon	OTHER	1997-11-12	2016-03-07	18.3162	18-20	PRISTEG	ZADAR	1	NO	NO	NEITHER	190.3
Šibenik-Knin	ŠIBENIK, Ekonomska	SIB_Sib_Ekon	OTHER	1997-10-15	2016-03-07	18.3929	18-20	PIROVAC	ŠIBENIK-KNIN	1	NO	NO	NEITHER	182.5
Šibenik-Knin	ŠIBENIK, Ekonomska	SIB_Sib_Ekon	OTHER	1997-09-16	2016-03-07	18.4723	18-20	ŠIBENIK	ŠIBENIK-KNIN	3	NO	NO	NEITHER	185.3
Šibenik-Knin	ŠIBENIK, Ekonomska	SIB_Sib_Ekon	OTHER	1997-09-06	2016-03-07	18.4997	18-20	STANKOVCI	ZADAR	1	NO	NO	NEITHER	183.5
Šibenik-Knin	ŠIBENIK, Ekonomska	SIB_Sib_Ekon	OTHER	1997-06-28	2016-03-07	18.6913	18-20	PAKOVO SELO	ŠIBENIK-KNIN	1	NO	NO	NEITHER	186.8
Šibenik-Knin	ŠIBENIK, Ekonomska	SIB_Sib_Ekon	OTHER	1997-06-14	2016-03-07	18.7296	18-20	ŠIBENIK	ŠIBENIK-KNIN	3	NO	NO	NEITHER	180.3
Šibenik-Knin	ŠIBENIK, Ekonomska	SIB_Sib_Ekon	OTHER	1997-06-04	2016-03-07	18.757	18-20	ROGOZNICA	ŠIBENIK-KNIN	1	NO	NO	NEITHER	194
Šibenik-Knin	ŠIBENIK, Ekonomska	SIB_Sib_Ekon	OTHER	1998-12-30	2016-03-07	17.1855	17	VODICE	ŠIBENIK-KNIN	1	YES	NO	ONE PARENT	186.2
Šibenik-Knin	ŠIBENIK, Ekonomska	SIB_Sib_Ekon	OTHER	1998-04-04	2016-03-07	17.9247	17	ŠIBENIK	ŠIBENIK-KNIN	3	NO	YES	ONE PARENT	182.7
Šibenik-Knin	ŠIBENIK, Ekonomska	SIB_Sib_Ekon	OTHER	1998-03-04	2016-03-07	18.0096	18-20	ŠIBENIK	ŠIBENIK-KNIN	3	YES	NO	ONE PARENT	183.2
Šibenik-Knin	ŠIBENIK, Ekonomska	SIB_Sib_Ekon	OTHER	1998-02-18	2016-03-07	18.0479	18-20	ŠIBENIK	ŠIBENIK-KNIN	3	NO	YES	ONE PARENT	175
Šibenik-Knin	ŠIBENIK, Ekonomska	SIB_Sib_Ekon	OTHER	1998-01-09	2016-03-07	18.1574	18-20	ŠIBENIK	ŠIBENIK-KNIN	3	YES	NO	ONE PARENT	195.6
Šibenik-Knin	ŠIBENIK, Ekonomska	SIB_Sib_Ekon	OTHER	1997-09-23	2016-03-07	18.4531	18-20	TRIBUNJ	ŠIBENIK-KNIN	1	NO	YES	ONE PARENT	180.1
Šibenik-Knin	ŠIBENIK, Ekonomska	SIB_Sib_Ekon	OTHER	1997-09-21	2016-03-07	18.4586	18-20	ŠIBENIK	ŠIBENIK-KNIN	3	NO	YES	ONE PARENT	175.4
Šibenik-Knin	ŠIBENIK, Ekonomska	SIB_Sib_Ekon	OTHER	1997-09-13	2016-03-07	18.4805	18-20	ŠIBENIK	ŠIBENIK-KNIN	3	NO	YES	ONE PARENT	181.5
Šibenik-Knin	ŠIBENIK, Ekonomska	SIB_Sib_Ekon	OTHER	1997-09-03	2016-03-07	18.5079	18-20	JADRTOVAC	ŠIBENIK-KNIN	1	NO	YES	ONE PARENT	186.2
Šibenik-Knin	ŠIBENIK, Ekonomska	SIB_Sib_Ekon	OTHER	1997-08-16	2016-03-07	18.5572	18-20	VRPOLJE	ŠIBENIK-KNIN	1	YES	NO	ONE PARENT	187.3
Šibenik-Knin	ŠIBENIK, Ekonomska	SIB_Sib_Ekon	OTHER	1997-06-02	2016-03-07	18.7625	18-20	ZATON	ŠIBENIK-KNIN	1	NO	YES	ONE PARENT	176.7
Šibenik-Knin	ŠIBENIK, Ekonomska	SIB_Sib_Ekon	OTHER	1997-06-01	2016-03-07	18.7652	18-20	VODICE	ŠIBENIK-KNIN	1	NO	YES	ONE PARENT	182.5
Šibenik-Knin	ŠIBENIK, Gimnazija A. Vrančića	SIB_Sib_Gim	GIMNAZIJA	1998-04-08	2016-03-15	17.9357	17	ŠIBENIK	ŠIBENIK-KNIN	3	YES	YES	BOTH PARENTS	187.6
Šibenik-Knin	ŠIBENIK, Gimnazija A. Vrančića	SIB_Sib_Gim	GIMNAZIJA	1998-04-01	2016-03-15	17.9548	17	ŠIBENIK	ŠIBENIK-KNIN	3	YES	YES	BOTH PARENTS	193.5
Šibenik-Knin	ŠIBENIK, Gimnazija A. Vrančića	SIB_Sib_Gim	GIMNAZIJA	1998-01-12	2016-03-15	18.1711	18-20	PIROVAC	ŠIBENIK-KNIN	1	YES	YES	BOTH PARENTS	190.4
Šibenik-Knin	ŠIBENIK, Gimnazija A. Vrančića	SIB_Sib_Gim	GIMNAZIJA	1998-01-08	2016-03-15	18.1821	18-20	SRIMA	ŠIBENIK-KNIN	1	YES	YES	BOTH PARENTS	179.5
Šibenik-Knin	ŠIBENIK, Gimnazija A. Vrančića	SIB_Sib_Gim	GIMNAZIJA	1997-12-14	2016-03-15	18.2505	18-20	ŠIBENIK	ŠIBENIK-KNIN	3	YES	YES	BOTH PARENTS	167.1
Šibenik-Knin	ŠIBENIK, Gimnazija A. Vrančića	SIB_Sib_Gim	GIMNAZIJA	1997-12-09	2016-03-15	18.2642	18-20	ŠIBENIK	ŠIBENIK-KNIN	3	YES	YES	BOTH PARENTS	186.4
Šibenik-Knin	ŠIBENIK, Gimnazija A. Vrančića	SIB_Sib_Gim	GIMNAZIJA	1997-09-17	2016-03-15	18.4914	18-20	ŠIBENIK	ŠIBENIK-KNIN	3	YES	YES	BOTH PARENTS	192.5
Šibenik-Knin	ŠIBENIK, Gimnazija A. Vrančića	SIB_Sib_Gim	GIMNAZIJA	1997-09-15	2016-03-15	18.4969	18-20	VODICE	ŠIBENIK-KNIN	1	YES	YES	BOTH PARENTS	185.5
Šibenik-Knin	ŠIBENIK, Gimnazija A. Vrančića	SIB_Sib_Gim	GIMNAZIJA	1997-07-24	2016-03-15	18.642	18-20	ŠIBENIK	ŠIBENIK-KNIN	3	YES	YES	BOTH PARENTS	179
Šibenik-Knin	ŠIBENIK, Gimnazija A. Vrančića	SIB_Sib_Gim	GIMNAZIJA	1997-07-13	2016-03-15	18.6721	18-20	ŠIBENIK	ŠIBENIK-KNIN	3	YES	YES	BOTH PARENTS	186.6
Šibenik-Knin	ŠIBENIK, Gimnazija A. Vrančića	SIB_Sib_Gim	GIMNAZIJA	1997-05-31	2016-03-15	18.7899	18-20	ŠIBENIK	ŠIBENIK-KNIN	3	YES	YES	BOTH PARENTS	179.5
Šibenik-Knin	ŠIBENIK, Gimnazija A. Vrančića	SIB_Sib_Gim	GIMNAZIJA	1997-05-28	2016-03-15	18.7981	18-20	VODICE	ŠIBENIK-KNIN	1	YES	YES	BOTH PARENTS	179.6
Šibenik-Knin	ŠIBENIK, Gimnazija A. Vrančića	SIB_Sib_Gim	GIMNAZIJA	1998-05-19	2016-03-15	17.8234	17	ŠIBENIK	ŠIBENIK-KNIN	3	NO	NO	NEITHER	182.9
Šibenik-Knin	ŠIBENIK, Gimnazija A. Vrančića	SIB_Sib_Gim	GIMNAZIJA	1997-12-03	2016-03-15	18.2806	18-20	VODICE	ŠIBENIK-KNIN	1	NO	NO	NEITHER	184
Šibenik-Knin	ŠIBENIK, Gimnazija A. Vrančića	SIB_Sib_Gim	GIMNAZIJA	1997-11-17	2016-03-15	18.3244	18-20	RAŽINE	ŠIBENIK-KNIN	1	NO	NO	NEITHER	190.2
Šibenik-Knin	ŠIBENIK, Gimnazija A. Vrančića	SIB_Sib_Gim	GIMNAZIJA	1997-10-12	2016-03-15	18.423	18-20	VODICE	ŠIBENIK-KNIN	1	NO	NO	NEITHER	174
Šibenik-Knin	ŠIBENIK, Gimnazija A. Vrančića	SIB_Sib_Gim	GIMNAZIJA	1997-09-30	2016-03-15	18.4559	18-20	ŠIBENIK	ŠIBENIK-KNIN	3	NO	NO	NEITHER	187.4
Šibenik-Knin	ŠIBENIK, Gimnazija A. Vrančića	SIB_Sib_Gim	GIMNAZIJA	1997-09-25	2016-03-15	18.4695	18-20	ŠIBENIK	ŠIBENIK-KNIN	3	NO	NO	NEITHER	185.1
Šibenik-Knin	ŠIBENIK, Gimnazija A. Vrančića	SIB_Sib_Gim	GIMNAZIJA	1997-08-27	2016-03-15	18.5489	18-20	BILICE	ŠIBENIK-KNIN	1	NO	NO	NEITHER	181.5
Šibenik-Knin	ŠIBENIK, Gimnazija A. Vrančića	SIB_Sib_Gim	GIMNAZIJA	1997-06-30	2016-03-15	18.7077	18-20	ŠIBENIK	ŠIBENIK-KNIN	3	NO	NO	NEITHER	192.4
Šibenik-Knin	ŠIBENIK, Gimnazija A. Vrančića	SIB_Sib_Gim	GIMNAZIJA	1997-06-04	2016-03-15	18.7789	18-20	VODICE	ŠIBENIK-KNIN	1	NO	NO	NEITHER	183.5
Šibenik-Knin	ŠIBENIK, Gimnazija A. Vrančića	SIB_Sib_Gim	GIMNAZIJA	1997-04-16	2016-03-07	18.8912	18-20	ŽABORIĆ	ŠIBENIK-KNIN	1	NO	NO	NEITHER	190.3
Šibenik-Knin	ŠIBENIK, Gimnazija A. Vrančića	SIB_Sib_Gim	GIMNAZIJA	1998-05-24	2016-03-15	17.8097	17	ŠIBENIK	ŠIBENIK-KNIN	3	NO	YES	ONE PARENT	179.5
Šibenik-Knin	ŠIBENIK, Gimnazija A. Vrančića	SIB_Sib_Gim	GIMNAZIJA	1997-12-20	2016-03-15	18.2341	18-20	ŠIBENIK	ŠIBENIK-KNIN	3	YES	NO	ONE PARENT	183.4
Šibenik-Knin	ŠIBENIK, Gimnazija A. Vrančića	SIB_Sib_Gim	GIMNAZIJA	1997-08-08	2016-03-15	18.601	18-20	ŠIBENIK	ŠIBENIK-KNIN	3	YES	NO	ONE PARENT	185.4
Šibenik-Knin	ŠIBENIK, Gimnazija A. Vrančića	SIB_Sib_Gim	GIMNAZIJA	1997-07-23	2016-03-15	18.6448	18-20	VODICE	ŠIBENIK-KNIN	1	NO	YES	ONE PARENT	185.1
Šibenik-Knin	ŠIBENIK, Gimnazija A. Vrančića	SIB_Sib_Gim	GIMNAZIJA	1997-04-19	2016-03-15	18.9049	18-20	ŠIBENIK	ŠIBENIK-KNIN	3	NO	YES	ONE PARENT	185.9
Šibenik-Knin	ŠIBENIK, Industrijsko-obrtnička	SIB_Sib_Ind	OTHER	1998-11-13	2017-02-06	18.2341	18-20	KRKOVIČ	ŠIBENIK-KNIN	1	NO	NO	NEITHER	163.5
Šibenik-Knin	ŠIBENIK, Industrijsko-obrtnička	SIB_Sib_Ind	OTHER	1998-10-19	2017-02-06	18.3025	18-20	ŠIBENIK	ŠIBENIK-KNIN	3	NO	NO	NEITHER	172.8
Šibenik-Knin	ŠIBENIK, Industrijsko-obrtnička	SIB_Sib_Ind	OTHER	1998-10-02	2017-02-06	18.3491	18-20	TISNO	ŠIBENIK-KNIN	1	NO	NO	NEITHER	184.4
Šibenik-Knin	ŠIBENIK, Industrijsko-obrtnička	SIB_Sib_Ind	OTHER	1998-10-02	2017-02-06	18.3491	18-20	ŠIBENIK	ŠIBENIK-KNIN	3	NO	NO	NEITHER	176.5
Šibenik-Knin	ŠIBENIK, Industrijsko-obrtnička	SIB_Sib_Ind	OTHER	1998-06-01	2017-02-06	18.6858	18-20	MILJEVCI	ŠIBENIK-KNIN	1	NO	NO	NEITHER	181.5
Šibenik-Knin	ŠIBENIK, Medicinska	SIB_Sib_Med	OTHER	1998-09-13	2017-02-06	18.4011	18-20	KNIN	ŠIBENIK-KNIN	2	unavailable	unavailable	unavailable	189
Šibenik-Knin	ŠIBENIK, Medicinska	SIB_Sib_Med	OTHER	1998-09-02	2017-02-06	18.4312	18-20	ŠIBENIK	ŠIBENIK-KNIN	3	unavailable	unavailable	unavailable	180.5
Šibenik-Knin	ŠIBENIK, Medicinska	SIB_Sib_Med	OTHER	1998-02-13	2017-02-06	18.9815	18-20	ŠIBENIK	ŠIBENIK-KNIN	3	unavailable	unavailable	unavailable	188
Šibenik-Knin	ŠIBENIK, Medicinska	SIB_Sib_Med	OTHER	1997-12-31	2017-02-06	19.102	18-20	KNIN	ŠIBENIK-KNIN	2	unavailable	unavailable	unavailable	188.8
Šibenik-Knin	ŠIBENIK, Medicinska	SIB_Sib_Med	OTHER	1997-11-08	2017-02-06	19.2471	18-20	KNIN	ŠIBENIK-KNIN	2	unavailable	unavailable	unavailable	181.9
Šibenik-Knin	ŠIBENIK, Medicinska	SIB_Sib_Med	OTHER	1997-11-06	2017-02-06	19.2526	18-20	KNIN	ŠIBENIK-KNIN	2	unavailable	unavailable	unavailable	171.5
Šibenik-Knin	ŠIBENIK, Medicinska	SIB_Sib_Med	OTHER	1997-09-21	2017-02-06	19.3785	18-20	KNIN	ŠIBENIK-KNIN	2	unavailable	unavailable	unavailable	187
Šibenik-Knin	ŠIBENIK, Medicinska	SIB_Sib_Med	OTHER	1997-09-07	2017-02-06	19.4168	18-20	ŠIBENIK	ŠIBENIK-KNIN	3	unavailable	unavailable	unavailable	182
Šibenik-Knin	ŠIBENIK, Medicinska	SIB_Sib_Med	OTHER	1997-08-19	2017-02-06	19.4689	18-20	KNIN	ŠIBENIK-KNIN	2	unavailable	unavailable	unavailable	172.6
Šibenik-Knin	ŠIBENIK, Medicinska	SIB_Sib_Med	OTHER	1997-07-08	2017-02-06	19.5838	18-20	UNEŠIČ	ŠIBENIK-KNIN	1	unavailable	unavailable	unavailable	181.9
Šibenik-Knin	ŠIBENIK, Medicinska	SIB_Sib_Med	OTHER	1997-06-07	2017-02-06	19.6687	18-20	KNIN	ŠIBENIK-KNIN	2	unavailable	unavailable	unavailable	177.3
Šibenik-Knin	ŠIBENIK, Medicinska	SIB_Sib_Med	OTHER	1997-06-06	2017-02-06	19.6715	18-20	ZATON	ŠIBENIK-KNIN	1	unavailable	unavailable	unavailable	179.9
Šibenik-Knin	ŠIBENIK, Medicinska	SIB_Sib_Med	OTHER	1997-05-14	2017-02-06	19.7344	18-20	KNIN	ŠIBENIK-KNIN	2	unavailable	unavailable	unavailable	185
Šibenik-Knin	ŠIBENIK, Prometno-tehnička	SIB_Sib_Prom	OTHER	1998-07-06	2016-03-07	17.6701	17	BRODARICA	ŠIBENIK-KNIN	1	NO	NO	NEITHER	182.4
Šibenik-Knin	ŠIBENIK, Prometno-tehnička	SIB_Sib_Prom	OTHER	1998-03-25	2016-03-07	17.9521	17	VRPOLJE	ŠIBENIK-KNIN	1	NO	NO	NEITHER	180.9
Šibenik-Knin	ŠIBENIK, Prometno-tehnička	SIB_Sib_Prom	OTHER	1998-03-24	2016-03-07	17.9548	17	MIRLOVIĆ ZAGORA	ŠIBENIK-KNIN	1	NO	NO	NEITHER	172
Šibenik-Knin	ŠIBENIK, Prometno-tehnička	SIB_Sib_Prom	OTHER	1998-01-19	2016-03-07	18.13	18-20	RAŽINE	ŠIBENIK-KNIN	1	NO	NO	NEITHER	173.9
Šibenik-Knin	ŠIBENIK, Prometno-tehnička	SIB_Sib_Prom	OTHER	1997-12-29	2016-03-07	18.1875	18-20	VRPOLJE	ŠIBENIK-KNIN	1	NO	NO	NEITHER	196
Šibenik-Knin	ŠIBENIK, Prometno-tehnička	SIB_Sib_Prom	OTHER	1997-12-05	2016-03-07	18.2533	18-20	ŠIBENIK	ŠIBENIK-KNIN	3	NO	NO	NEITHER	178.5
Šibenik-Knin	ŠIBENIK, Prometno-tehnička	SIB_Sib_Prom	OTHER	1997-11-22	2016-03-07	18.2888	18-20	ROGOZNICA	ŠIBENIK-KNIN	1	NO	NO	NEITHER	195.8
Šibenik-Knin	ŠIBENIK, Prometno-tehnička	SIB_Sib_Prom	OTHER	1997-11-19	2016-03-07	18.2971	18-20	GREBAŠTICA	ŠIBENIK-KNIN	1	NO	NO	NEITHER	187.3
Šibenik-Knin	ŠIBENIK, Prometno-tehnička	SIB_Sib_Prom	OTHER	1997-11-09	2016-03-07	18.3244	18-20	VRPOLJE	ŠIBENIK-KNIN	1	NO	NO	NEITHER	187.3
Šibenik-Knin	ŠIBENIK, Prometno-tehnička	SIB_Sib_Prom	OTHER	1997-10-04	2016-03-07	18.423	18-20	ŠIBENIK	ŠIBENIK-KNIN	3	NO	NO	NEITHER	178.9
Šibenik-Knin	ŠIBENIK, Prometno-tehnička	SIB_Sib_Prom	OTHER	1997-09-20	2016-03-07	18.4613	18-20	RAŽINE GORNJE	ŠIBENIK-KNIN	1	NO	NO	NEITHER	181.7
Šibenik-Knin	ŠIBENIK, Prometno-tehnička	SIB_Sib_Prom	OTHER	1997-09-16	2016-03-07	18.4723	18-20	ČISTA VELIKA	ŠIBENIK-KNIN	1	NO	NO	NEITHER	183
Šibenik-Knin	ŠIBENIK, Prometno-tehnička	SIB_Sib_Prom	OTHER	1997-09-15	2016-03-07	18.475	18-20	PERKOVIĆ	ŠIBENIK-KNIN	1	NO	NO	NEITHER	176.9
Šibenik-Knin	ŠIBENIK, Prometno-tehnička	SIB_Sib_Prom	OTHER	1997-09-07	2016-03-07	18.4969	18-20	BRODARICA	ŠIBENIK-KNIN	1	NO	NO	NEITHER	186.5
Šibenik-Knin	ŠIBENIK, Prometno-tehnička	SIB_Sib_Prom	OTHER	1997-08-19	2016-03-07	18.5489	18-20	ŠIBENIK	ŠIBENIK-KNIN	3	NO	NO	NEITHER	187.6
Šibenik-Knin	ŠIBENIK, Prometno-tehnička	SIB_Sib_Prom	OTHER	1997-08-11	2016-03-07	18.5708	18-20	DONJE POLJE	ŠIBENIK-KNIN	1	NO	NO	NEITHER	177.5
Šibenik-Knin	ŠIBENIK, Prometno-tehnička	SIB_Sib_Prom	OTHER	1997-07-23	2016-03-07	18.6229	18-20	PRIMOŠTEN	ŠIBENIK-KNIN	1	NO	NO	NEITHER	181.1
Šibenik-Knin	ŠIBENIK, Prometno-tehnička	SIB_Sib_Prom	OTHER	1997-06-25	2016-03-07	18.6995	18-20	IĆEVO	ŠIBENIK-KNIN	1	NO	NO	NEITHER	170.6
Šibenik-Knin	ŠIBENIK, Prometno-tehnička	SIB_Sib_Prom	OTHER	1997-06-22	2016-03-07	18.7077	18-20	ŠIBENIK	ŠIBENIK-KNIN	3	NO	NO	NEITHER	205.5
Šibenik-Knin	ŠIBENIK, Prometno-tehnička	SIB_Sib_Prom	OTHER	1997-05-25	2016-03-07	18.7844	18-20	DANILO BIVANJ	ŠIBENIK-KNIN	1	NO	NO	NEITHER	186.8
Šibenik-Knin	ŠIBENIK, Prometno-tehnička	SIB_Sib_Prom	OTHER	1997-05-25	2016-03-07	18.7844	18-20	LOZOVAC	ŠIBENIK-KNIN	1	NO	NO	NEITHER	179.7
Šibenik-Knin	ŠIBENIK, Prometno-tehnička	SIB_Sib_Prom	OTHER	1997-05-25	2016-03-07	18.7844	18-20	ŠIBENIK	ŠIBENIK-KNIN	3	NO	NO	NEITHER	186.2
Šibenik-Knin	ŠIBENIK, Prometno-tehnička	SIB_Sib_Prom	OTHER	1997-05-05	2016-03-07	18.8392	18-20	TRBINJ	ŠIBENIK-KNIN	1	NO	NO	NEITHER	183.1
Šibenik-Knin	ŠIBENIK, Prometno-tehnička	SIB_Sib_Prom	OTHER	1997-04-14	2016-03-07	18.8966	18-20	JEZERA	ŠIBENIK-KNIN	1	NO	NO	NEITHER	180.8
Šibenik-Knin	ŠIBENIK, Prometno-tehnička	SIB_Sib_Prom	OTHER	1997-04-09	2016-03-07	18.9103	18-20	GAĆELEZI	ŠIBENIK-KNIN	1	NO	NO	NEITHER	184.1
Šibenik-Knin	ŠIBENIK, Prometno-tehnička	SIB_Sib_Prom	OTHER	1996-09-10	2016-03-07	19.488	18-20	BRODARICA	ŠIBENIK-KNIN	1	NO	NO	NEITHER	183.8
Šibenik-Knin	ŠIBENIK, Prometno-tehnička	SIB_Sib_Prom	OTHER	1996-07-10	2016-03-07	19.6578	18-20	SEDRAMIĆ	ŠIBENIK-KNIN	1	NO	NO	NEITHER	195.2
Šibenik-Knin	ŠIBENIK, Prometno-tehnička	SIB_Sib_Prom	OTHER	1998-04-02	2016-03-07	17.9302	17	ŠIBENIK	ŠIBENIK-KNIN	3	YES	NO	ONE PARENT	189.6
Šibenik-Knin	ŠIBENIK, Prometno-tehnička	SIB_Sib_Prom	OTHER	1998-03-24	2016-03-07	17.9548	17	ŠIBENIK	ŠIBENIK-KNIN	3	NO	YES	ONE PARENT	189.3
Šibenik-Knin	ŠIBENIK, Prometno-tehnička	SIB_Sib_Prom	OTHER	1997-09-09	2016-03-07	18.4914	18-20	ŠIBENIK	ŠIBENIK-KNIN	3	YES	NO	ONE PARENT	187.5
Šibenik-Knin	ŠIBENIK, Prometno-tehnička	SIB_Sib_Prom	OTHER	1997-09-04	2016-03-07	18.5051	18-20	ZLARIN	ŠIBENIK-KNIN	1	YES	NO	ONE PARENT	191.5
Šibenik-Knin	ŠIBENIK, Prometno-tehnička	SIB_Sib_Prom	OTHER	1997-06-02	2016-03-07	18.7625	18-20	ŠIBENIK	ŠIBENIK-KNIN	3	YES	NO	ONE PARENT	169.8
Šibenik-Knin	ŠIBENIK, Prometno-tehnička	SIB_Sib_Prom	OTHER	1997-05-15	2016-03-07	18.8118	18-20	VODICE	ŠIBENIK-KNIN	1	YES	NO	ONE PARENT	174.2
Šibenik-Knin	ŠIBENIK, Prometno-tehnička	SIB_Sib_Prom	OTHER	1997-04-07	2016-03-07	18.9158	18-20	MURTER	ŠIBENIK-KNIN	1	NO	YES	ONE PARENT	189.5
Šibenik-Knin	ŠIBENIK, Srednja strukovna	SIB_Sib_Struk	OTHER	1998-11-27	2017-02-06	18.1958	18-20	ŠIBENIK	ŠIBENIK-KNIN	3	NO	NO	NEITHER	178.6
Šibenik-Knin	ŠIBENIK, Turističko-ugostiteljska	SIB_Sib_Tur	OTHER	1998-08-11	2017-02-06	18.4914	18-20	BILICE	ŠIBENIK-KNIN	1	YES	YES	BOTH PARENTS	176
Šibenik-Knin	ŠIBENIK, Turističko-ugostiteljska	SIB_Sib_Tur	OTHER	1999-04-20	2017-02-06	17.8015	17	BRODARICA	ŠIBENIK-KNIN	1	NO	NO	NEITHER	181
Šibenik-Knin	ŠIBENIK, Turističko-ugostiteljska	SIB_Sib_Tur	OTHER	1999-04-01	2017-02-06	17.8535	17	ŠIBENIK	ŠIBENIK-KNIN	3	NO	NO	NEITHER	183.8
Šibenik-Knin	ŠIBENIK, Turističko-ugostiteljska	SIB_Sib_Tur	OTHER	1999-02-15	2017-02-06	17.9767	17	ŠIBENIK	ŠIBENIK-KNIN	3	NO	NO	NEITHER	192.5
Šibenik-Knin	ŠIBENIK, Turističko-ugostiteljska	SIB_Sib_Tur	OTHER	1998-11-23	2017-02-06	18.2067	18-20	PRIMOSTEN	ŠIBENIK-KNIN	1	NO	NO	NEITHER	178.9
Šibenik-Knin	ŠIBENIK, Turističko-ugostiteljska	SIB_Sib_Tur	OTHER	1998-11-22	2017-02-06	18.2094	18-20	VODICE	ŠIBENIK-KNIN	1	NO	NO	NEITHER	172
Šibenik-Knin	ŠIBENIK, Turističko-ugostiteljska	SIB_Sib_Tur	OTHER	1998-10-21	2017-02-06	18.2971	18-20	ŠIBENIK	ŠIBENIK-KNIN	3	NO	NO	NEITHER	184
Šibenik-Knin	ŠIBENIK, Turističko-ugostiteljska	SIB_Sib_Tur	OTHER	1998-10-14	2017-02-06	18.3162	18-20	ŠIBENIK	ŠIBENIK-KNIN	3	NO	NO	NEITHER	188.3
Šibenik-Knin	ŠIBENIK, Turističko-ugostiteljska	SIB_Sib_Tur	OTHER	1998-09-24	2017-02-06	18.371	18-20	VODICE	ŠIBENIK-KNIN	1	NO	NO	NEITHER	191.5
Šibenik-Knin	ŠIBENIK, Turističko-ugostiteljska	SIB_Sib_Tur	OTHER	1998-09-15	2017-02-06	18.3956	18-20	ŠIBENIK	ŠIBENIK-KNIN	3	NO	NO	NEITHER	191.5
Šibenik-Knin	ŠIBENIK, Turističko-ugostiteljska	SIB_Sib_Tur	OTHER	1998-09-04	2017-02-06	18.4257	18-20	ROGOZNICA	ŠIBENIK-KNIN	1	NO	NO	NEITHER	172
Šibenik-Knin	ŠIBENIK, Turističko-ugostiteljska	SIB_Sib_Tur	OTHER	1998-06-12	2017-02-06	18.6557	18-20	BRATIŠKOVCI	ŠIBENIK-KNIN	1	NO	NO	NEITHER	183.8
Šibenik-Knin	ŠIBENIK, Turističko-ugostiteljska	SIB_Sib_Tur	OTHER	1998-06-05	2017-02-06	18.6749	18-20	ŠIBENIK	ŠIBENIK-KNIN	3	NO	NO	NEITHER	184
Šibenik-Knin	ŠIBENIK, Turističko-ugostiteljska	SIB_Sib_Tur	OTHER	1998-04-13	2017-02-06	18.82	18-20	JEZERA	ŠIBENIK-KNIN	1	NO	NO	NEITHER	184.3
Šibenik-Knin	ŠIBENIK, Turističko-ugostiteljska	SIB_Sib_Tur	OTHER	1999-03-22	2017-02-06	17.8809	17	RAŽINE	ŠIBENIK-KNIN	1	YES	NO	ONE PARENT	185
Šibenik-Knin	ŠIBENIK, Turističko-ugostiteljska	SIB_Sib_Tur	OTHER	1999-03-14	2017-02-06	17.9028	17	ZATON	ŠIBENIK-KNIN	1	YES	NO	ONE PARENT	175
Šibenik-Knin	ŠIBENIK, Turističko-ugostiteljska	SIB_Sib_Tur	OTHER	1998-07-29	2017-02-06	18.527	18-20	VODICE	ŠIBENIK-KNIN	1	NO	YES	ONE PARENT	183
Šibenik-Knin	ŠIBENIK, Turističko-ugostiteljska	SIB_Sib_Tur	OTHER	1998-05-07	2017-02-06	18.7543	18-20	KONJEVRATE	ŠIBENIK-KNIN	1	YES	NO	ONE PARENT	179.3
Šibenik-Knin	ŠIBENIK, Turističko-ugostiteljska	SIB_Sib_Tur	OTHER	1997-06-24	2017-02-06	19.6222	18-20	PRIMOSTEN	ŠIBENIK-KNIN	1	YES	NO	ONE PARENT	182.5
Zadar	BENKOVAC, Srednja škola kneza Branimira	ZAD_Ben_Sred	MIXED	1998-04-06	2016-04-20	18.0397	18-20	BENKOVAC	ZADAR	2	NO	NO	NEITHER	179.3
Zadar	BENKOVAC, Srednja škola kneza Branimira	ZAD_Ben_Sred	MIXED	1998-03-24	2016-04-20	18.0753	18-20	BENKOVAC	ZADAR	2	NO	NO	NEITHER	190.9
Zadar	BENKOVAC, Srednja škola kneza Branimira	ZAD_Ben_Sred	MIXED	1998-02-25	2016-04-20	18.1492	18-20	LISIČIĆ	ZADAR	1	NO	NO	NEITHER	185.3
Zadar	BENKOVAC, Srednja škola kneza Branimira	ZAD_Ben_Sred	MIXED	1998-02-25	2016-04-20	18.1492	18-20	BENKOVAC	ZADAR	2	NO	NO	NEITHER	183.2
Zadar	BENKOVAC, Srednja škola kneza Branimira	ZAD_Ben_Sred	MIXED	1998-02-19	2016-04-20	18.1656	18-20	BENKOVAC	ZADAR	2	NO	NO	NEITHER	184.6
Zadar	BENKOVAC, Srednja škola kneza Branimira	ZAD_Ben_Sred	MIXED	1998-02-13	2016-04-20	18.1821	18-20	BENKOVAC	ZADAR	2	NO	NO	NEITHER	179.5
Zadar	BENKOVAC, Srednja škola kneza Branimira	ZAD_Ben_Sred	MIXED	1997-12-29	2016-04-20	18.308	18-20	PERUŠIĆ	LIKA-SENJ	1	NO	NO	NEITHER	178
Zadar	BENKOVAC, Srednja škola kneza Branimira	ZAD_Ben_Sred	MIXED	1997-12-29	2016-04-20	18.308	18-20	PRISTEG	ZADAR	1	NO	NO	NEITHER	190.2
Zadar	BENKOVAC, Srednja škola kneza Branimira	ZAD_Ben_Sred	MIXED	1997-12-28	2016-04-20	18.3107	18-20	BENKOVAC	ZADAR	2	NO	NO	NEITHER	200.7
Zadar	BENKOVAC, Srednja škola kneza Branimira	ZAD_Ben_Sred	MIXED	1997-12-27	2016-04-20	18.3135	18-20	LISIČIĆ	ZADAR	1	NO	NO	NEITHER	186.8
Zadar	BENKOVAC, Srednja škola kneza Branimira	ZAD_Ben_Sred	MIXED	1997-12-01	2016-04-20	18.3847	18-20	BENKOVAC	ZADAR	2	NO	NO	NEITHER	167.1
Zadar	BENKOVAC, Srednja škola kneza Branimira	ZAD_Ben_Sred	MIXED	1997-11-27	2016-04-20	18.3956	18-20	LISIČIĆ	ZADAR	1	NO	NO	NEITHER	198.3
Zadar	BENKOVAC, Srednja škola kneza Branimira	ZAD_Ben_Sred	MIXED	1997-11-24	2016-04-20	18.4038	18-20	BIOGRAD NA MORU	ZADAR	1	NO	NO	NEITHER	188.2
Zadar	BENKOVAC, Srednja škola kneza Branimira	ZAD_Ben_Sred	MIXED	1997-11-17	2016-04-20	18.423	18-20	RODALJICE	ZADAR	1	NO	NO	NEITHER	172.2
Zadar	BENKOVAC, Srednja škola kneza Branimira	ZAD_Ben_Sred	MIXED	1997-10-12	2016-04-20	18.5216	18-20	LIŠANE OSTROVAČKE	ZADAR	1	NO	NO	NEITHER	177.9
Zadar	BENKOVAC, Srednja škola kneza Branimira	ZAD_Ben_Sred	MIXED	1997-10-10	2016-04-20	18.527	18-20	BIOGRAD NA MORU	ZADAR	1	NO	NO	NEITHER	185.1
Zadar	BENKOVAC, Srednja škola kneza Branimira	ZAD_Ben_Sred	MIXED	1997-09-03	2016-04-20	18.6283	18-20	KAKMA	ZADAR	1	NO	NO	NEITHER	180.2
Zadar	BENKOVAC, Srednja škola kneza Branimira	ZAD_Ben_Sred	MIXED	1997-08-24	2016-04-20	18.6557	18-20	LISIČIĆ	ZADAR	1	NO	NO	NEITHER	175.5
Zadar	BENKOVAC, Srednja škola kneza Branimira	ZAD_Ben_Sred	MIXED	1997-08-23	2016-04-20	18.6585	18-20	PERUŠIĆ BENKOVAČKI	ZADAR	1	NO	NO	NEITHER	192.5
Zadar	BENKOVAC, Srednja škola kneza Branimira	ZAD_Ben_Sred	MIXED	1997-08-12	2016-04-20	18.6886	18-20	PODGRAĐE	SPLIT-DALMACIJA	1	NO	NO	NEITHER	179.6
Zadar	BENKOVAC, Srednja škola kneza Branimira	ZAD_Ben_Sred	MIXED	1997-08-04	2016-04-20	18.7105	18-20	BJELINA	ZADAR	1	NO	NO	NEITHER	189.8
Zadar	BENKOVAC, Srednja škola kneza Branimira	ZAD_Ben_Sred	MIXED	1997-08-03	2016-04-20	18.7132	18-20	PERUŠIĆ	LIKA-SENJ	1	NO	NO	NEITHER	182.8
Zadar	BENKOVAC, Srednja škola kneza Branimira	ZAD_Ben_Sred	MIXED	1997-06-23	2016-04-20	18.8255	18-20	BENKOVAC	ZADAR	2	NO	NO	NEITHER	186
Zadar	BENKOVAC, Srednja škola kneza Branimira	ZAD_Ben_Sred	MIXED	1997-05-30	2016-04-20	18.8912	18-20	BENKOVAC	ZADAR	2	NO	NO	NEITHER	182.7
Zadar	BENKOVAC, Srednja škola kneza Branimira	ZAD_Ben_Sred	MIXED	1997-05-07	2016-04-20	18.9541	18-20	PERUŠIĆ BENKOVAČKI	ZADAR	1	NO	NO	NEITHER	188.6
Zadar	BENKOVAC, Srednja škola kneza Branimira	ZAD_Ben_Sred	MIXED	1997-05-06	2016-04-20	18.9569	18-20	BENKOVAC	ZADAR	2	NO	NO	NEITHER	188
Zadar	BENKOVAC, Srednja škola kneza Branimira	ZAD_Ben_Sred	MIXED	1998-03-03	2016-04-20	18.1328	18-20	ŠOPOT	ZADAR	1	YES	NO	ONE PARENT	173.1
Zadar	BENKOVAC, Srednja škola kneza Branimira	ZAD_Ben_Sred	MIXED	1998-01-28	2016-04-20	18.2259	18-20	KORLAT	ZADAR	1	YES	NO	ONE PARENT	183.9
Zadar	BENKOVAC, Srednja škola kneza Branimira	ZAD_Ben_Sred	MIXED	1997-06-26	2016-04-20	18.8172	18-20	BENKOVAC	ZADAR	2	NO	YES	ONE PARENT	184.3
Zadar	BENKOVAC, Srednja škola kneza Branimira	ZAD_Ben_Sred	MIXED	1997-04-12	2016-04-20	19.0226	18-20	LIŠANE OSTROVAČKE	ZADAR	1	YES	NO	ONE PARENT	184.2
Zadar	GRAČAC, Srednja škola	ZAD_Gra_Sred	MIXED	1999-12-27	2017-04-04	17.2704	17	GRAČAC	ZADAR	1	NO	NO	NEITHER	174
Zadar	GRAČAC, Srednja škola	ZAD_Gra_Sred	MIXED	1999-09-20	2017-04-04	17.5387	17	GRAČAC	ZADAR	1	NO	NO	NEITHER	181.2
Zadar	GRAČAC, Srednja škola	ZAD_Gra_Sred	MIXED	1999-09-14	2017-04-04	17.5551	17	GRAČAC	ZADAR	1	NO	NO	NEITHER	173.9
Zadar	GRAČAC, Srednja škola	ZAD_Gra_Sred	MIXED	1999-07-31	2017-04-04	17.6783	17	TIHI DOL	ZADAR	1	NO	NO	NEITHER	184.6
Zadar	GRAČAC, Srednja škola	ZAD_Gra_Sred	MIXED	1999-07-03	2017-04-04	17.755	17	GRAČAC	ZADAR	1	NO	NO	NEITHER	172.6
Zadar	GRAČAC, Srednja škola	ZAD_Gra_Sred	MIXED	1999-05-23	2017-04-04	17.8672	17	GRAČAC	ZADAR	1	NO	NO	NEITHER	182.2
Zadar	GRAČAC, Srednja škola	ZAD_Gra_Sred	MIXED	1999-05-15	2017-04-04	17.8891	17	GRAČAC	ZADAR	1	NO	NO	NEITHER	185.2
Zadar	GRAČAC, Srednja škola	ZAD_Gra_Sred	MIXED	1999-01-30	2017-04-04	18.1766	18-20	GRAČAC	ZADAR	1	NO	NO	NEITHER	181.3
Zadar	GRAČAC, Srednja škola	ZAD_Gra_Sred	MIXED	1998-09-03	2017-04-04	18.5845	18-20	GRAČAC	ZADAR	1	NO	NO	NEITHER	175.6
Zadar	GRAČAC, Srednja škola	ZAD_Gra_Sred	MIXED	1998-05-27	2017-04-04	18.8556	18-20	GRAČAC	ZADAR	1	NO	NO	NEITHER	192
Zadar	GRAČAC, Srednja škola	ZAD_Gra_Sred	MIXED	1998-02-04	2017-04-04	19.1622	18-20	GRAČAC	ZADAR	1	NO	NO	NEITHER	173.8
Zadar	GRAČAC, Srednja škola	ZAD_Gra_Sred	MIXED	1999-12-26	2017-04-04	17.2731	17	GRAČAC	ZADAR	1	YES	NO	ONE PARENT	172
Zadar	GRAČAC, Srednja škola	ZAD_Gra_Sred	MIXED	1998-08-04	2017-04-04	18.6667	18-20	GRAČAC	ZADAR	1	YES	NO	ONE PARENT	176.1
Zadar	ZADAR, Gimnazija J. Barakovića	ZAD_Gra_Gim	GIMNAZIJA	1998-01-05	2016-02-22	18.13	18-20	ZADAR	ZADAR	3	YES	YES	BOTH PARENTS	193
Zadar	ZADAR, Gimnazija J. Barakovića	ZAD_Gra_Gim	GIMNAZIJA	1997-12-17	2016-02-22	18.1821	18-20	SV. FILIP I JAKOV	ZADAR	1	YES	YES	BOTH PARENTS	184.5
Zadar	ZADAR, Gimnazija J. Barakovića	ZAD_Gra_Gim	GIMNAZIJA	1997-08-18	2016-02-22	18.5133	18-20	PRIVLAKA	ZADAR	1	YES	YES	BOTH PARENTS	188.3
Zadar	ZADAR, Gimnazija J. Barakovića	ZAD_Gra_Gim	GIMNAZIJA	1997-07-31	2016-02-22	18.5626	18-20	NIN	ZADAR	1	YES	YES	BOTH PARENTS	188.2
Zadar	ZADAR, Gimnazija J. Barakovića	ZAD_Gra_Gim	GIMNAZIJA	1997-07-30	2016-02-22	18.5654	18-20	ZADAR	ZADAR	3	YES	YES	BOTH PARENTS	184.4
Zadar	ZADAR, Gimnazija J. Barakovića	ZAD_Gra_Gim	GIMNAZIJA	1997-07-21	2016-02-22	18.59	18-20	ZADAR	ZADAR	3	YES	YES	BOTH PARENTS	182.5
Zadar	ZADAR, Gimnazija J. Barakovića	ZAD_Gra_Gim	GIMNAZIJA	1997-03-18	2016-02-22	18.9322	18-20	ZADAR	ZADAR	3	YES	YES	BOTH PARENTS	174.1
Zadar	ZADAR, Gimnazija J. Barakovića	ZAD_Gra_Gim	GIMNAZIJA	1998-03-10	2016-02-22	17.9548	17	ZADAR	ZADAR	3	NO	NO	NEITHER	187.1
Zadar	ZADAR, Gimnazija J. Barakovića	ZAD_Gra_Gim	GIMNAZIJA	1998-02-20	2016-02-22	18.0041	18-20	SUKOŠAN	ZADAR	1	NO	NO	NEITHER	184.1
Zadar	ZADAR, Gimnazija J. Barakovića	ZAD_Gra_Gim	GIMNAZIJA	1998-02-16	2016-02-22	18.0151	18-20	SV. PETAR NA MORU	ZADAR	1	NO	NO	NEITHER	178.3
Zadar	ZADAR, Gimnazija J. Barakovića	ZAD_Gra_Gim	GIMNAZIJA	1998-01-03	2016-02-22	18.1355	18-20	KALI	ZADAR	1	NO	NO	NEITHER	173.8
Zadar	ZADAR, Gimnazija J. Barakovića	ZAD_Gra_Gim	GIMNAZIJA	1997-12-31	2016-02-22	18.1437	18-20	ZADAR	ZADAR	3	NO	NO	NEITHER	181.3
Zadar	ZADAR, Gimnazija J. Barakovića	ZAD_Gra_Gim	GIMNAZIJA	1997-12-30	2016-02-22	18.1465	18-20	ZADAR	ZADAR	3	NO	NO	NEITHER	182
Zadar	ZADAR, Gimnazija J. Barakovića	ZAD_Gra_Gim	GIMNAZIJA	1997-12-26	2016-02-22	18.1574	18-20	ZADAR	ZADAR	3	NO	NO	NEITHER	175
Zadar	ZADAR, Gimnazija J. Barakovića	ZAD_Gra_Gim	GIMNAZIJA	1997-12-07	2016-02-22	18.2094	18-20	ZADAR	ZADAR	3	NO	NO	NEITHER	181.3
Zadar	ZADAR, Gimnazija J. Barakovića	ZAD_Gra_Gim	GIMNAZIJA	1997-12-06	2016-02-22	18.2122	18-20	ZADAR	ZADAR	3	NO	NO	NEITHER	178.9
Zadar	ZADAR, Gimnazija J. Barakovića	ZAD_Gra_Gim	GIMNAZIJA	1997-10-20	2016-02-22	18.3409	18-20	UGLJAN	ZADAR	1	NO	NO	NEITHER	195
Zadar	ZADAR, Gimnazija J. Barakovića	ZAD_Gra_Gim	GIMNAZIJA	1997-10-06	2016-02-22	18.3792	18-20	STARIGRAD	ZADAR	1	NO	NO	NEITHER	194
Zadar	ZADAR, Gimnazija J. Barakovića	ZAD_Gra_Gim	GIMNAZIJA	1997-09-28	2016-02-22	18.4011	18-20	ZADAR	ZADAR	3	NO	NO	NEITHER	192.1
Zadar	ZADAR, Gimnazija J. Barakovića	ZAD_Gra_Gim	GIMNAZIJA	1997-08-11	2016-02-22	18.5325	18-20	ZADAR	ZADAR	3	NO	NO	NEITHER	194.9
Zadar	ZADAR, Gimnazija J. Barakovića	ZAD_Gra_Gim	GIMNAZIJA	1997-08-05	2016-02-22	18.5489	18-20	BIBINJE	ZADAR	1	NO	NO	NEITHER	180
Zadar	ZADAR, Gimnazija J. Barakovića	ZAD_Gra_Gim	GIMNAZIJA	1997-07-04	2016-02-22	18.6366	18-20	ZADAR	ZADAR	3	NO	NO	NEITHER	187.8
Zadar	ZADAR, Gimnazija J. Barakovića	ZAD_Gra_Gim	GIMNAZIJA	1997-05-22	2016-02-22	18.7543	18-20	ZADAR	ZADAR	3	NO	NO	NEITHER	187
Zadar	ZADAR, Gimnazija J. Barakovića	ZAD_Gra_Gim	GIMNAZIJA	1997-05-04	2016-02-22	18.8036	18-20	ZADAR	ZADAR	3	NO	NO	NEITHER	183.8
Zadar	ZADAR, Gimnazija J. Barakovića	ZAD_Gra_Gim	GIMNAZIJA	1997-04-29	2016-02-22	18.8172	18-20	POLIČNIK	ZADAR	1	NO	NO	NEITHER	187.2
Zadar	ZADAR, Gimnazija J. Barakovića	ZAD_Gra_Gim	GIMNAZIJA	1997-04-17	2016-02-22	18.8501	18-20	ZADAR	ZADAR	3	NO	NO	NEITHER	180.7
Zadar	ZADAR, Gimnazija J. Barakovića	ZAD_Gra_Gim	GIMNAZIJA	1998-10-30	2016-02-22	17.3142	17	ZADAR	ZADAR	3	YES	NO	ONE PARENT	185
Zadar	ZADAR, Gimnazija J. Barakovića	ZAD_Gra_Gim	GIMNAZIJA	1998-02-18	2016-02-22	18.0096	18-20	ZADAR	ZADAR	3	YES	NO	ONE PARENT	184.9
Zadar	ZADAR, Gimnazija J. Barakovića	ZAD_Gra_Gim	GIMNAZIJA	1998-02-15	2016-02-22	18.0178	18-20	ZADAR	ZADAR	3	NO	YES	ONE PARENT	192.2
Zadar	ZADAR, Gimnazija J. Barakovića	ZAD_Gra_Gim	GIMNAZIJA	1998-02-02	2016-02-22	18.0534	18-20	ZADAR	ZADAR	3	NO	YES	ONE PARENT	191.3
Zadar	ZADAR, Gimnazija J. Barakovića	ZAD_Gra_Gim	GIMNAZIJA	1997-12-07	2016-02-22	18.2094	18-20	ZADAR	ZADAR	3	YES	NO	ONE PARENT	187.9
Zadar	ZADAR, Gimnazija J. Barakovića	ZAD_Gra_Gim	GIMNAZIJA	1997-11-13	2016-02-22	18.2752	18-20	SUKOŠAN	ZADAR	1	NO	YES	ONE PARENT	189.4
Zadar	ZADAR, Gimnazija J. Barakovića	ZAD_Gra_Gim	GIMNAZIJA	1997-10-25	2016-02-22	18.3272	18-20	BIBINJE	ZADAR	1	YES	NO	ONE PARENT	184.4
Zadar	ZADAR, Gimnazija J. Barakovića	ZAD_Gra_Gim	GIMNAZIJA	1997-09-19	2016-02-22	18.4257	18-20	ZADAR	ZADAR	3	NO	YES	ONE PARENT	179.2
Zadar	ZADAR, Gimnazija J. Barakovića	ZAD_Gra_Gim	GIMNAZIJA	1997-09-06	2016-02-22	18.4613	18-20	ZADAR	ZADAR	3	NO	YES	ONE PARENT	180.9
Zadar	ZADAR, Gimnazija J. Barakovića	ZAD_Gra_Gim	GIMNAZIJA	1997-07-18	2016-02-22	18.5982	18-20	ZADAR	ZADAR	3	YES	NO	ONE PARENT	182.8
Zadar	ZADAR, Gimnazija J. Barakovića	ZAD_Gra_Gim	GIMNAZIJA	1997-06-03	2016-02-22	18.7214	18-20	ZADAR	ZADAR	3	YES	NO	ONE PARENT	179.7
Zadar	ZADAR, Gimnazija J. Barakovića	ZAD_Gra_Gim	GIMNAZIJA	1997-05-12	2016-02-22	18.7817	18-20	ZADAR	ZADAR	3	YES	NO	ONE PARENT	185.5
Zadar	ZADAR, Gimnazija J. Barakovića	ZAD_Gra_Gim	GIMNAZIJA	1997-04-13	2016-02-22	18.8611	18-20	ZADAR	ZADAR	3	YES	NO	ONE PARENT	176.8
Zadar	ZADAR, Pomorska škola	ZAD_Gra_Pom	OTHER	1998-03-31	2016-02-22	17.8973	17	ZADAR	ZADAR	3	YES	YES	BOTH PARENTS	185.5
Zadar	ZADAR, Pomorska škola	ZAD_Gra_Pom	OTHER	1998-02-27	2016-02-22	17.9849	17	ZADAR	ZADAR	3	YES	YES	BOTH PARENTS	190.3
Zadar	ZADAR, Pomorska škola	ZAD_Gra_Pom	OTHER	1997-10-29	2016-02-22	18.3162	18-20	ZADAR	ZADAR	3	YES	YES	BOTH PARENTS	182.9
Zadar	ZADAR, Pomorska škola	ZAD_Gra_Pom	OTHER	1997-10-03	2016-02-22	18.3874	18-20	ZADAR	ZADAR	3	YES	YES	BOTH PARENTS	186.1
Zadar	ZADAR, Pomorska škola	ZAD_Gra_Pom	OTHER	1997-09-02	2016-02-22	18.4723	18-20	ZADAR	ZADAR	3	YES	YES	BOTH PARENTS	189.4
Zadar	ZADAR, Pomorska škola	ZAD_Gra_Pom	OTHER	1998-10-09	2016-02-22	17.3717	17	KOŽINO	ZADAR	1	NO	NO	NEITHER	179.6
Zadar	ZADAR, Pomorska škola	ZAD_Gra_Pom	OTHER	1998-02-20	2016-02-22	18.0041	18-20	UGLJAN	ZADAR	1	NO	NO	NEITHER	184.6
Zadar	ZADAR, Pomorska škola	ZAD_Gra_Pom	OTHER	1998-02-04	2016-02-22	18.0479	18-20	PETRČANE	ZADAR	1	NO	NO	NEITHER	183.3
Zadar	ZADAR, Pomorska škola	ZAD_Gra_Pom	OTHER	1998-01-26	2016-02-22	18.0726	18-20	ZADAR	ZADAR	3	NO	NO	NEITHER	181.5
Zadar	ZADAR, Pomorska škola	ZAD_Gra_Pom	OTHER	1998-01-15	2016-02-22	18.1027	18-20	ZADAR	ZADAR	3	NO	NO	NEITHER	177.9
Zadar	ZADAR, Pomorska škola	ZAD_Gra_Pom	OTHER	1998-01-13	2016-02-22	18.1081	18-20	BRIŠEVO	SPLIT-DALMACIJA	1	NO	NO	NEITHER	170.9
Zadar	ZADAR, Pomorska škola	ZAD_Gra_Pom	OTHER	1998-01-05	2016-02-22	18.13	18-20	NOVALJA	LIKA-SENJ	1	NO	NO	NEITHER	182.8
Zadar	ZADAR, Pomorska škola	ZAD_Gra_Pom	OTHER	1998-01-04	2016-02-22	18.1328	18-20	BIBINJE	ZADAR	1	NO	NO	NEITHER	186.8
Zadar	ZADAR, Pomorska škola	ZAD_Gra_Pom	OTHER	1997-12-10	2016-02-22	18.2012	18-20	ZADAR	ZADAR	3	NO	NO	NEITHER	172.8
Zadar	ZADAR, Pomorska škola	ZAD_Gra_Pom	OTHER	1997-12-07	2016-02-22	18.2094	18-20	POLJICA	ZADAR	1	NO	NO	NEITHER	189.5
Zadar	ZADAR, Pomorska škola	ZAD_Gra_Pom	OTHER	1997-11-30	2016-02-22	18.2286	18-20	VELI RAT	ZADAR	1	NO	NO	NEITHER	181.1
Zadar	ZADAR, Pomorska škola	ZAD_Gra_Pom	OTHER	1997-11-12	2016-02-22	18.2779	18-20	TINJ	ZADAR	1	NO	NO	NEITHER	187.9
Zadar	ZADAR, Pomorska škola	ZAD_Gra_Pom	OTHER	1997-11-09	2016-02-22	18.2861	18-20	SUKOŠAN	ZADAR	1	NO	NO	NEITHER	172
Zadar	ZADAR, Pomorska škola	ZAD_Gra_Pom	OTHER	1997-09-30	2016-02-22	18.3956	18-20	BIBINJE	ZADAR	1	NO	NO	NEITHER	190.9
Zadar	ZADAR, Pomorska škola	ZAD_Gra_Pom	OTHER	1997-09-25	2016-02-22	18.4093	18-20	ZADAR	ZADAR	3	NO	NO	NEITHER	186.5
Zadar	ZADAR, Pomorska škola	ZAD_Gra_Pom	OTHER	1997-09-05	2016-02-22	18.4641	18-20	ZADAR	ZADAR	3	NO	NO	NEITHER	177.7
Zadar	ZADAR, Pomorska škola	ZAD_Gra_Pom	OTHER	1997-08-29	2016-02-22	18.4832	18-20	ZADAR	ZADAR	3	NO	NO	NEITHER	177.6
Zadar	ZADAR, Pomorska škola	ZAD_Gra_Pom	OTHER	1997-08-16	2016-02-22	18.5188	18-20	PODGRADINA	ZADAR	1	NO	NO	NEITHER	180.7
Zadar	ZADAR, Pomorska škola	ZAD_Gra_Pom	OTHER	1997-08-14	2016-02-22	18.5243	18-20	ZADAR	ZADAR	3	NO	NO	NEITHER	173
Zadar	ZADAR, Pomorska škola	ZAD_Gra_Pom	OTHER	1997-08-13	2016-02-22	18.527	18-20	ZADAR	ZADAR	3	NO	NO	NEITHER	179.8
Zadar	ZADAR, Pomorska škola	ZAD_Gra_Pom	OTHER	1997-07-19	2016-02-22	18.5955	18-20	POLJANA	ZADAR	1	NO	NO	NEITHER	180
Zadar	ZADAR, Pomorska škola	ZAD_Gra_Pom	OTHER	1997-07-16	2016-02-22	18.6037	18-20	PAŠMAN	ZADAR	1	NO	NO	NEITHER	188.4
Zadar	ZADAR, Pomorska škola	ZAD_Gra_Pom	OTHER	1997-07-15	2016-02-22	18.6064	18-20	PRIVLAKA	ZADAR	1	NO	NO	NEITHER	182.9
Zadar	ZADAR, Pomorska škola	ZAD_Gra_Pom	OTHER	1997-07-07	2016-02-22	18.6283	18-20	JOVIČI	ZADAR	1	NO	NO	NEITHER	186.4
Zadar	ZADAR, Pomorska škola	ZAD_Gra_Pom	OTHER	1997-07-07	2016-02-22	18.6283	18-20	ŽERAVA	ZADAR	1	NO	NO	NEITHER	179.9
Zadar	ZADAR, Pomorska škola	ZAD_Gra_Pom	OTHER	1997-06-20	2016-02-22	18.6749	18-20	ZADAR	ZADAR	3	NO	NO	NEITHER	185.5
Zadar	ZADAR, Pomorska škola	ZAD_Gra_Pom	OTHER	1997-06-19	2016-02-22	18.6776	18-20	VRSI	ZADAR	1	NO	NO	NEITHER	179.5
Zadar	ZADAR, Pomorska škola	ZAD_Gra_Pom	OTHER	1997-05-29	2016-02-22	18.7351	18-20	PRIVLAKA	ZADAR	1	NO	NO	NEITHER	184
Zadar	ZADAR, Pomorska škola	ZAD_Gra_Pom	OTHER	1997-05-22	2016-02-22	18.7543	18-20	ZEMUNIK DONJI	ZADAR	1	NO	NO	NEITHER	171.6
Zadar	ZADAR, Pomorska škola	ZAD_Gra_Pom	OTHER	1997-05-20	2016-02-22	18.7598	18-20	ZADAR	ZADAR	3	NO	NO	NEITHER	186.4
Zadar	ZADAR, Pomorska škola	ZAD_Gra_Pom	OTHER	1997-05-01	2016-02-22	18.8118	18-20	ZADAR	ZADAR	3	NO	NO	NEITHER	180
Zadar	ZADAR, Pomorska škola	ZAD_Gra_Pom	OTHER	1997-04-22	2016-02-22	18.8364	18-20	ZADAR	ZADAR	3	NO	NO	NEITHER	179.6
Zadar	ZADAR, Pomorska škola	ZAD_Gra_Pom	OTHER	1997-04-13	2016-02-22	18.8611	18-20	ZADAR	ZADAR	3	NO	NO	NEITHER	182.2
Zadar	ZADAR, Pomorska škola	ZAD_Gra_Pom	OTHER	1997-04-03	2016-02-22	18.8884	18-20	ZADAR	ZADAR	3	NO	NO	NEITHER	183.8
Zadar	ZADAR, Pomorska škola	ZAD_Gra_Pom	OTHER	1996-08-27	2016-02-22	19.488	18-20	ZADAR	ZADAR	3	NO	NO	NEITHER	175.6
Zadar	ZADAR, Pomorska škola	ZAD_Gra_Pom	OTHER	1996-04-29	2016-02-22	19.8166	18-20	SUKOŠAN	ZADAR	1	NO	NO	NEITHER	183.7
Zadar	ZADAR, Pomorska škola	ZAD_Gra_Pom	OTHER	1996-04-14	2016-02-22	19.8576	18-20	BENKOVAC	ZADAR	2	NO	NO	NEITHER	181.4
Zadar	ZADAR, Pomorska škola	ZAD_Gra_Pom	OTHER	1996-04-01	2016-02-22	19.8932	18-20	ZADAR	ZADAR	3	NO	NO	NEITHER	182.3
Zadar	ZADAR, Pomorska škola	ZAD_Gra_Pom	OTHER	1995-12-29	2016-02-22	20.1506	18-20	PAG	ZADAR	1	NO	NO	NEITHER	186.4
Zadar	ZADAR, Pomorska škola	ZAD_Gra_Pom	OTHER	1998-03-10	2016-02-22	17.9548	17	ZADAR	ZADAR	3	YES	NO	ONE PARENT	186.3
Zadar	ZADAR, Pomorska škola	ZAD_Gra_Pom	OTHER	1998-03-05	2016-02-22	17.9685	17	PAKOŠTANE	ZADAR	1	YES	NO	ONE PARENT	186.6
Zadar	ZADAR, Pomorska škola	ZAD_Gra_Pom	OTHER	1998-02-25	2016-02-22	17.9904	17	ZADAR	ZADAR	3	YES	NO	ONE PARENT	177
Zadar	ZADAR, Pomorska škola	ZAD_Gra_Pom	OTHER	1997-12-24	2016-02-22	18.1629	18-20	ZADAR	ZADAR	3	YES	NO	ONE PARENT	180.6
Zadar	ZADAR, Pomorska škola	ZAD_Gra_Pom	OTHER	1997-11-07	2016-02-22	18.2916	18-20	ŠKABRNJA	ZADAR	1	YES	NO	ONE PARENT	174.8
Zadar	ZADAR, Pomorska škola	ZAD_Gra_Pom	OTHER	1997-10-29	2016-02-22	18.3162	18-20	ZADAR	ZADAR	3	YES	NO	ONE PARENT	188.9
Zadar	ZADAR, Pomorska škola	ZAD_Gra_Pom	OTHER	1997-10-10	2016-02-22	18.3682	18-20	UGLJAN	ZADAR	1	YES	NO	ONE PARENT	189.7
Zadar	ZADAR, Pomorska škola	ZAD_Gra_Pom	OTHER	1997-05-14	2016-02-22	18.7762	18-20	PREKO	ZADAR	1	NO	YES	ONE PARENT	189.5
Zadar	ZADAR, Pomorska škola	ZAD_Gra_Pom	OTHER	1997-05-13	2016-02-22	18.7789	18-20	BIOGRAD NA MORU	ZADAR	1	YES	NO	ONE PARENT	188.6
Zadar	ZADAR, Pomorska škola	ZAD_Gra_Pom	OTHER	1997-05-09	2016-02-22	18.7899	18-20	ZADAR	ZADAR	3	YES	NO	ONE PARENT	182.3
Zadar	ZADAR, Pomorska škola	ZAD_Gra_Pom	OTHER	1997-04-29	2016-02-22	18.8172	18-20	ZADAR	ZADAR	3	NO	YES	ONE PARENT	185
Zadar	ZADAR, Pomorska škola	ZAD_Gra_Pom	OTHER	1997-04-22	2016-02-22	18.8364	18-20	BIOGRAD NA MORU	ZADAR	1	YES	NO	ONE PARENT	177.1
Zadar	ZADAR, Pomorska škola	ZAD_Gra_Pom	OTHER	1997-03-10	2016-02-22	18.9541	18-20	ZADAR	ZADAR	3	YES	NO	ONE PARENT	185.4
Zadar	ZADAR, Strukovna škola V. Vlatkovića	ZAD_Gra_Struk	OTHER	1997-12-11	2016-02-22	18.1985	18-20	ZADAR	ZADAR	3	YES	YES	BOTH PARENTS	187
Zadar	ZADAR, Strukovna škola V. Vlatkovića	ZAD_Gra_Struk	OTHER	1997-06-16	2016-02-22	18.6858	18-20	POSEDARJE	ZADAR	1	YES	YES	BOTH PARENTS	183
Zadar	ZADAR, Strukovna škola V. Vlatkovića	ZAD_Gra_Struk	OTHER	1997-04-05	2016-02-22	18.883	18-20	ZADAR	ZADAR	3	YES	YES	BOTH PARENTS	186.4
Zadar	ZADAR, Strukovna škola V. Vlatkovića	ZAD_Gra_Struk	OTHER	1996-02-23	2016-02-22	19.9973	18-20	KOLAN	ZADAR	1	YES	YES	BOTH PARENTS	182.9
Zadar	ZADAR, Strukovna škola V. Vlatkovića	ZAD_Gra_Struk	OTHER	1998-03-10	2016-02-22	17.9548	17	ZEMUNIK DONJI	ZADAR	1	NO	NO	NEITHER	190.8
Zadar	ZADAR, Strukovna škola V. Vlatkovića	ZAD_Gra_Struk	OTHER	1998-03-04	2016-02-22	17.9713	17	ZADAR	ZADAR	3	NO	NO	NEITHER	176.7
Zadar	ZADAR, Strukovna škola V. Vlatkovića	ZAD_Gra_Struk	OTHER	1998-02-20	2016-02-22	18.0041	18-20	SLIVNICA	ZADAR	1	NO	NO	NEITHER	168.6
Zadar	ZADAR, Strukovna škola V. Vlatkovića	ZAD_Gra_Struk	OTHER	1998-02-16	2016-02-22	18.0151	18-20	POLIČNIK	ZADAR	1	NO	NO	NEITHER	183.9
Zadar	ZADAR, Strukovna škola V. Vlatkovića	ZAD_Gra_Struk	OTHER	1998-02-15	2016-02-22	18.0178	18-20	PAKOŠTANE	ZADAR	1	NO	NO	NEITHER	182.3
Zadar	ZADAR, Strukovna škola V. Vlatkovića	ZAD_Gra_Struk	OTHER	1998-02-12	2016-02-22	18.026	18-20	SOKOŠAN	ZADAR	1	NO	NO	NEITHER	183.1
Zadar	ZADAR, Strukovna škola V. Vlatkovića	ZAD_Gra_Struk	OTHER	1998-02-11	2016-02-22	18.0287	18-20	BENKOVAC	ZADAR	2	NO	NO	NEITHER	189.4
Zadar	ZADAR, Strukovna škola V. Vlatkovića	ZAD_Gra_Struk	OTHER	1998-02-09	2016-02-22	18.0342	18-20	ZEMUNIK DONJI	ZADAR	1	NO	NO	NEITHER	174.2
Zadar	ZADAR, Strukovna škola V. Vlatkovića	ZAD_Gra_Struk	OTHER	1998-01-18	2016-02-22	18.0945	18-20	OBROVAC	ZADAR	1	NO	NO	NEITHER	184.2
Zadar	ZADAR, Strukovna škola V. Vlatkovića	ZAD_Gra_Struk	OTHER	1998-01-04	2016-02-22	18.1328	18-20	SLIVNICA	ZADAR	1	NO	NO	NEITHER	177.5
Zadar	ZADAR, Strukovna škola V. Vlatkovića	ZAD_Gra_Struk	OTHER	1998-01-02	2016-02-22	18.1383	18-20	PAKOŠTANE	ZADAR	1	NO	NO	NEITHER	193.2
Zadar	ZADAR, Strukovna škola V. Vlatkovića	ZAD_Gra_Struk	OTHER	1997-12-29	2016-02-22	18.1492	18-20	NOVIGRAD	ZADAR	1	NO	NO	NEITHER	178.5
Zadar	ZADAR, Strukovna škola V. Vlatkovića	ZAD_Gra_Struk	OTHER	1997-12-21	2016-02-22	18.1711	18-20	BIBINJE	ZADAR	1	NO	NO	NEITHER	190.7
Zadar	ZADAR, Strukovna škola V. Vlatkovića	ZAD_Gra_Struk	OTHER	1997-11-26	2016-02-22	18.2396	18-20	BIOGRAD NA MORU	ZADAR	1	NO	NO	NEITHER	173.7
Zadar	ZADAR, Strukovna škola V. Vlatkovića	ZAD_Gra_Struk	OTHER	1997-11-03	2016-02-22	18.3025	18-20	SUKOŠAN	ZADAR	1	NO	NO	NEITHER	183.3
Zadar	ZADAR, Strukovna škola V. Vlatkovića	ZAD_Gra_Struk	OTHER	1997-11-01	2016-02-22	18.308	18-20	NIN	ZADAR	1	NO	NO	NEITHER	181.2
Zadar	ZADAR, Strukovna škola V. Vlatkovića	ZAD_Gra_Struk	OTHER	1997-10-28	2016-02-22	18.319	18-20	ŠKABRNJA	ZADAR	1	NO	NO	NEITHER	175
Zadar	ZADAR, Strukovna škola V. Vlatkovića	ZAD_Gra_Struk	OTHER	1997-10-20	2016-02-22	18.3409	18-20	ZADAR	ZADAR	3	NO	NO	NEITHER	182.9
Zadar	ZADAR, Strukovna škola V. Vlatkovića	ZAD_Gra_Struk	OTHER	1997-10-02	2016-02-22	18.3901	18-20	SUKOŠAN	ZADAR	1	NO	NO	NEITHER	181.1
Zadar	ZADAR, Strukovna škola V. Vlatkovića	ZAD_Gra_Struk	OTHER	1997-09-28	2016-02-22	18.4011	18-20	BENKOVAC	ZADAR	2	NO	NO	NEITHER	195.2
Zadar	ZADAR, Strukovna škola V. Vlatkovića	ZAD_Gra_Struk	OTHER	1997-09-15	2016-02-22	18.4367	18-20	VRANA	ZADAR	1	NO	NO	NEITHER	187.4
Zadar	ZADAR, Strukovna škola V. Vlatkovića	ZAD_Gra_Struk	OTHER	1997-08-29	2016-02-22	18.4832	18-20	SMILČIĆ	ZADAR	1	NO	NO	NEITHER	186.9
Zadar	ZADAR, Strukovna škola V. Vlatkovića	ZAD_Gra_Struk	OTHER	1997-08-08	2016-02-22	18.5407	18-20	ZADAR	ZADAR	3	NO	NO	NEITHER	182
Zadar	ZADAR, Strukovna škola V. Vlatkovića	ZAD_Gra_Struk	OTHER	1997-08-04	2016-02-22	18.5517	18-20	ZADAR	ZADAR	3	NO	NO	NEITHER	184.4
Zadar	ZADAR, Strukovna škola V. Vlatkovića	ZAD_Gra_Struk	OTHER	1997-08-04	2016-02-22	18.5517	18-20	ZADAR	ZADAR	3	NO	NO	NEITHER	175.5
Zadar	ZADAR, Strukovna škola V. Vlatkovića	ZAD_Gra_Struk	OTHER	1997-07-27	2016-02-22	18.5736	18-20	ZADAR	ZADAR	3	NO	NO	NEITHER	182.7
Zadar	ZADAR, Strukovna škola V. Vlatkovića	ZAD_Gra_Struk	OTHER	1997-06-22	2016-02-22	18.6694	18-20	PAŠMAN	ZADAR	1	NO	NO	NEITHER	191.2
Zadar	ZADAR, Strukovna škola V. Vlatkovića	ZAD_Gra_Struk	OTHER	1997-06-19	2016-02-22	18.6776	18-20	KARIN DONJI	ZADAR	1	NO	NO	NEITHER	181.9
Zadar	ZADAR, Strukovna škola V. Vlatkovića	ZAD_Gra_Struk	OTHER	1997-06-17	2016-02-22	18.6831	18-20	BIBINJE	ZADAR	1	NO	NO	NEITHER	173.9
Zadar	ZADAR, Strukovna škola V. Vlatkovića	ZAD_Gra_Struk	OTHER	1997-06-06	2016-02-22	18.7132	18-20	NOVIGRAD	ZADAR	1	NO	NO	NEITHER	185
Zadar	ZADAR, Strukovna škola V. Vlatkovića	ZAD_Gra_Struk	OTHER	1997-05-30	2016-02-22	18.7324	18-20	BENKOVAC	ZADAR	2	NO	NO	NEITHER	177.4
Zadar	ZADAR, Strukovna škola V. Vlatkovića	ZAD_Gra_Struk	OTHER	1997-05-26	2016-02-22	18.7433	18-20	SUKOŠAN	ZADAR	1	NO	NO	NEITHER	178.3
Zadar	ZADAR, Strukovna škola V. Vlatkovića	ZAD_Gra_Struk	OTHER	1997-05-17	2016-02-22	18.768	18-20	POLIČNIK	ZADAR	1	NO	NO	NEITHER	191.2
Zadar	ZADAR, Strukovna škola V. Vlatkovića	ZAD_Gra_Struk	OTHER	1997-05-15	2016-02-22	18.7734	18-20	ZADAR	ZADAR	3	NO	NO	NEITHER	183
Zadar	ZADAR, Strukovna škola V. Vlatkovića	ZAD_Gra_Struk	OTHER	1997-05-06	2016-02-22	18.7981	18-20	BIOGRAD NA MORU	ZADAR	1	NO	NO	NEITHER	182.4
Zadar	ZADAR, Strukovna škola V. Vlatkovića	ZAD_Gra_Struk	OTHER	1997-04-28	2016-02-22	18.82	18-20	POSEDARJE	ZADAR	1	NO	NO	NEITHER	171.6
Zadar	ZADAR, Strukovna škola V. Vlatkovića	ZAD_Gra_Struk	OTHER	1997-01-16	2016-02-22	19.0992	18-20	ZADAR	ZADAR	3	NO	NO	NEITHER	176.9
Zadar	ZADAR, Strukovna škola V. Vlatkovića	ZAD_Gra_Struk	OTHER	1996-05-02	2016-02-22	19.8084	18-20	SUKOŠAN	ZADAR	1	NO	NO	NEITHER	178.3
Zadar	ZADAR, Strukovna škola V. Vlatkovića	ZAD_Gra_Struk	OTHER	1998-02-19	2016-02-22	18.0068	18-20	BIOGRAD NA MORU	ZADAR	1	NO	YES	ONE PARENT	190
Zadar	ZADAR, Strukovna škola V. Vlatkovića	ZAD_Gra_Struk	OTHER	1997-12-23	2016-02-22	18.1656	18-20	ŽMAN	ZADAR	1	YES	NO	ONE PARENT	177.9
Zadar	ZADAR, Strukovna škola V. Vlatkovića	ZAD_Gra_Struk	OTHER	1997-10-22	2016-02-22	18.3354	18-20	KUKLJICA	ZADAR	1	YES	NO	ONE PARENT	182.4
Zadar	ZADAR, Strukovna škola V. Vlatkovića	ZAD_Gra_Struk	OTHER	1997-09-19	2016-02-22	18.4257	18-20	GRAČAC	ZADAR	1	NO	YES	ONE PARENT	197
Zadar	ZADAR, Strukovna škola V. Vlatkovića	ZAD_Gra_Struk	OTHER	1997-09-09	2016-02-22	18.4531	18-20	KUSTIĆI	LIKA-SENJ	1	YES	NO	ONE PARENT	180
Zadar	ZADAR, Strukovna škola V. Vlatkovića	ZAD_Gra_Struk	OTHER	1997-08-23	2016-02-22	18.4997	18-20	MURTER	ŠIBENIK-KNIN	1	NO	YES	ONE PARENT	189.8
Zadar	ZADAR, Strukovna škola V. Vlatkovića	ZAD_Gra_Struk	OTHER	1996-10-26	2016-02-22	19.3238	18-20	PRIVLAKA	ZADAR	1	NO	YES	ONE PARENT	173.4
Zadar	ZADAR, Strukovna škola V. Vlatkovića	ZAD_Gra_Struk	OTHER	1996-09-19	2016-02-22	19.4251	18-20	ZADAR	ZADAR	3	NO	YES	ONE PARENT	175.5
Zadar	ZADAR, Tehnička	ZAD_Gra_Teh	OTHER	1998-03-04	2016-02-22	17.9713	17	STARIGRAD	ZADAR	1	YES	YES	BOTH PARENTS	173.7
Zadar	ZADAR, Tehnička	ZAD_Gra_Teh	OTHER	1998-02-02	2016-02-22	18.0534	18-20	KARIN GORNJI	ZADAR	1	YES	YES	BOTH PARENTS	189.5
Zadar	ZADAR, Tehnička	ZAD_Gra_Teh	OTHER	1997-11-14	2016-02-22	18.2724	18-20	MOVICA	ZADAR	1	YES	YES	BOTH PARENTS	191.4
Zadar	ZADAR, Tehnička	ZAD_Gra_Teh	OTHER	1997-10-27	2016-02-22	18.3217	18-20	ZADAR	ZADAR	3	YES	YES	BOTH PARENTS	174
Zadar	ZADAR, Tehnička	ZAD_Gra_Teh	OTHER	1997-08-28	2016-02-22	18.486	18-20	PODGRADINA	ZADAR	1	YES	YES	BOTH PARENTS	185.7
Zadar	ZADAR, Tehnička	ZAD_Gra_Teh	OTHER	1997-08-28	2016-02-22	18.486	18-20	PODGRADINA	ZADAR	1	YES	YES	BOTH PARENTS	177.5
Zadar	ZADAR, Tehnička	ZAD_Gra_Teh	OTHER	1998-06-25	2016-02-22	17.6619	17	ISLAM LATINSKI	ZADAR	1	NO	NO	NEITHER	188.8
Zadar	ZADAR, Tehnička	ZAD_Gra_Teh	OTHER	1998-04-30	2016-02-22	17.8152	17	POLIČNIK	ZADAR	1	NO	NO	NEITHER	194
Zadar	ZADAR, Tehnička	ZAD_Gra_Teh	OTHER	1998-03-18	2016-02-22	17.9329	17	GALOVAC	ZADAR	1	NO	NO	NEITHER	171.9
Zadar	ZADAR, Tehnička	ZAD_Gra_Teh	OTHER	1998-03-17	2016-02-22	17.9357	17	ZADAR	ZADAR	3	NO	NO	NEITHER	187.3
Zadar	ZADAR, Tehnička	ZAD_Gra_Teh	OTHER	1998-03-04	2016-02-22	17.9713	17	ZADAR	ZADAR	3	NO	NO	NEITHER	178.7
Zadar	ZADAR, Tehnička	ZAD_Gra_Teh	OTHER	1998-03-02	2016-02-22	17.9767	17	RAŠTANE GORNJE	ZADAR	1	NO	NO	NEITHER	180.7
Zadar	ZADAR, Tehnička	ZAD_Gra_Teh	OTHER	1998-02-06	2016-02-22	18.0424	18-20	PRIDRAGA	ZADAR	1	NO	NO	NEITHER	181.4
Zadar	ZADAR, Tehnička	ZAD_Gra_Teh	OTHER	1998-02-03	2016-02-22	18.0507	18-20	KARIN GORNJI	ZADAR	1	NO	NO	NEITHER	186.3
Zadar	ZADAR, Tehnička	ZAD_Gra_Teh	OTHER	1998-01-19	2016-02-22	18.0917	18-20	ZADAR	ZADAR	3	NO	NO	NEITHER	174.8
Zadar	ZADAR, Tehnička	ZAD_Gra_Teh	OTHER	1997-12-22	2016-02-22	18.1684	18-20	PAG	ZADAR	1	NO	NO	NEITHER	185.5
Zadar	ZADAR, Tehnička	ZAD_Gra_Teh	OTHER	1997-12-05	2016-02-22	18.2149	18-20	VRSI	ZADAR	1	NO	NO	NEITHER	182.5
Zadar	ZADAR, Tehnička	ZAD_Gra_Teh	OTHER	1997-11-24	2016-02-22	18.245	18-20	POLIČNIK	ZADAR	1	NO	NO	NEITHER	182.8
Zadar	ZADAR, Tehnička	ZAD_Gra_Teh	OTHER	1997-10-24	2016-02-22	18.3299	18-20	PODGRADINA	ZADAR	1	NO	NO	NEITHER	186.1
Zadar	ZADAR, Tehnička	ZAD_Gra_Teh	OTHER	1997-10-16	2016-02-22	18.3518	18-20	STARA NOVALJA	LIKA-SENJ	1	NO	NO	NEITHER	184.9
Zadar	ZADAR, Tehnička	ZAD_Gra_Teh	OTHER	1997-10-14	2016-02-22	18.3573	18-20	SUKOŠAN	ZADAR	1	NO	NO	NEITHER	171.5
Zadar	ZADAR, Tehnička	ZAD_Gra_Teh	OTHER	1997-10-11	2016-02-22	18.3655	18-20	BIBINJE	ZADAR	1	NO	NO	NEITHER	183.3
Zadar	ZADAR, Tehnička	ZAD_Gra_Teh	OTHER	1997-10-06	2016-02-22	18.3792	18-20	ZADAR	ZADAR	3	NO	NO	NEITHER	181.8
Zadar	ZADAR, Tehnička	ZAD_Gra_Teh	OTHER	1997-10-03	2016-02-22	18.3874	18-20	ZADAR	ZADAR	3	NO	NO	NEITHER	175
Zadar	ZADAR, Tehnička	ZAD_Gra_Teh	OTHER	1997-09-26	2016-02-22	18.4066	18-20	ZADAR	ZADAR	3	NO	NO	NEITHER	178.6
Zadar	ZADAR, Tehnička	ZAD_Gra_Teh	OTHER	1997-09-26	2016-02-22	18.4066	18-20	ZADAR	ZADAR	3	NO	NO	NEITHER	182.3
Zadar	ZADAR, Tehnička	ZAD_Gra_Teh	OTHER	1997-09-20	2016-02-22	18.423	18-20	POVLJANA	ZADAR	1	NO	NO	NEITHER	181.4
Zadar	ZADAR, Tehnička	ZAD_Gra_Teh	OTHER	1997-09-17	2016-02-22	18.4312	18-20	BIOGRAD NA MORU	ZADAR	1	NO	NO	NEITHER	173.9
Zadar	ZADAR, Tehnička	ZAD_Gra_Teh	OTHER	1997-09-17	2016-02-22	18.4312	18-20	ZADAR	ZADAR	3	NO	NO	NEITHER	190.3
Zadar	ZADAR, Tehnička	ZAD_Gra_Teh	OTHER	1997-08-31	2016-02-22	18.4778	18-20	ZADAR	ZADAR	3	NO	NO	NEITHER	190.7
Zadar	ZADAR, Tehnička	ZAD_Gra_Teh	OTHER	1997-08-18	2016-02-22	18.5133	18-20	ZADAR	ZADAR	3	NO	NO	NEITHER	182.6
Zadar	ZADAR, Tehnička	ZAD_Gra_Teh	OTHER	1997-08-17	2016-02-22	18.5161	18-20	BIOGRAD NA MORU	ZADAR	1	NO	NO	NEITHER	176.8
Zadar	ZADAR, Tehnička	ZAD_Gra_Teh	OTHER	1997-08-17	2016-02-22	18.5161	18-20	RAŠTENIĆ	ZADAR	1	NO	NO	NEITHER	174.4
Zadar	ZADAR, Tehnička	ZAD_Gra_Teh	OTHER	1997-08-14	2016-02-22	18.5243	18-20	STARIGRAD	ZADAR	1	NO	NO	NEITHER	183.8
Zadar	ZADAR, Tehnička	ZAD_Gra_Teh	OTHER	1997-08-08	2016-02-22	18.5407	18-20	BENKOVAC	ZADAR	2	NO	NO	NEITHER	174.5
Zadar	ZADAR, Tehnička	ZAD_Gra_Teh	OTHER	1997-08-06	2016-02-22	18.5462	18-20	PALJUV	ZADAR	1	NO	NO	NEITHER	177.9
Zadar	ZADAR, Tehnička	ZAD_Gra_Teh	OTHER	1997-07-21	2016-02-22	18.59	18-20	STARIGRAD	ZADAR	1	NO	NO	NEITHER	182.2
Zadar	ZADAR, Tehnička	ZAD_Gra_Teh	OTHER	1997-07-08	2016-02-22	18.6256	18-20	ZADAR	ZADAR	3	NO	NO	NEITHER	176.6
Zadar	ZADAR, Tehnička	ZAD_Gra_Teh	OTHER	1997-07-02	2016-02-22	18.642	18-20	ZADAR	ZADAR	3	NO	NO	NEITHER	176.5
Zadar	ZADAR, Tehnička	ZAD_Gra_Teh	OTHER	1997-07-02	2016-02-22	18.642	18-20	ZADAR	ZADAR	3	NO	NO	NEITHER	189.5
Zadar	ZADAR, Tehnička	ZAD_Gra_Teh	OTHER	1997-07-02	2016-02-22	18.642	18-20	ZADAR	ZADAR	3	NO	NO	NEITHER	188.9
Zadar	ZADAR, Tehnička	ZAD_Gra_Teh	OTHER	1997-06-19	2016-02-22	18.6776	18-20	VIR	ZADAR	1	NO	NO	NEITHER	181.1
Zadar	ZADAR, Tehnička	ZAD_Gra_Teh	OTHER	1997-05-29	2016-02-22	18.7351	18-20	TINJ	ZADAR	1	NO	NO	NEITHER	181.3
Zadar	ZADAR, Tehnička	ZAD_Gra_Teh	OTHER	1997-05-29	2016-02-22	18.7351	18-20	ZADAR	ZADAR	3	NO	NO	NEITHER	181.5
Zadar	ZADAR, Tehnička	ZAD_Gra_Teh	OTHER	1997-05-27	2016-02-22	18.7406	18-20	BIOGRAD NA MORU	ZADAR	1	NO	NO	NEITHER	177.9
Zadar	ZADAR, Tehnička	ZAD_Gra_Teh	OTHER	1997-05-04	2016-02-22	18.8036	18-20	POSEDARJE	ZADAR	1	NO	NO	NEITHER	179.7
Zadar	ZADAR, Tehnička	ZAD_Gra_Teh	OTHER	1997-05-03	2016-02-22	18.8063	18-20	BIOGRAD NA MORU	ZADAR	1	NO	NO	NEITHER	181.3
Zadar	ZADAR, Tehnička	ZAD_Gra_Teh	OTHER	1997-04-24	2016-02-22	18.8309	18-20	RUPALJ	ZADAR	1	NO	NO	NEITHER	190.8
Zadar	ZADAR, Tehnička	ZAD_Gra_Teh	OTHER	1997-04-18	2016-02-22	18.8474	18-20	KARIN GORNJI	ZADAR	1	NO	NO	NEITHER	179.7
Zadar	ZADAR, Tehnička	ZAD_Gra_Teh	OTHER	1997-04-04	2016-02-22	18.8857	18-20	PAKOŠTANE	ZADAR	1	NO	NO	NEITHER	182.3
Zadar	ZADAR, Tehnička	ZAD_Gra_Teh	OTHER	1996-12-22	2016-02-22	19.1677	18-20	KOLAN	ZADAR	1	NO	NO	NEITHER	183.3
Zadar	ZADAR, Tehnička	ZAD_Gra_Teh	OTHER	1998-05-15	2016-02-22	17.7741	17	BIOGRAD NA MORU	ZADAR	1	YES	NO	ONE PARENT	188.5
Zadar	ZADAR, Tehnička	ZAD_Gra_Teh	OTHER	1998-02-20	2016-02-22	18.0041	18-20	ZADAR	ZADAR	3	YES	NO	ONE PARENT	182.8
Zadar	ZADAR, Tehnička	ZAD_Gra_Teh	OTHER	1997-12-03	2016-02-22	18.2204	18-20	PRIVLAKA	ZADAR	1	YES	NO	ONE PARENT	181.6
Zadar	ZADAR, Tehnička	ZAD_Gra_Teh	OTHER	1997-11-16	2016-02-22	18.2669	18-20	PAG	ZADAR	1	YES	NO	ONE PARENT	172.4
Zadar	ZADAR, Tehnička	ZAD_Gra_Teh	OTHER	1997-10-23	2016-02-22	18.3326	18-20	ZADAR	ZADAR	3	YES	NO	ONE PARENT	177.6
Zadar	ZADAR, Tehnička	ZAD_Gra_Teh	OTHER	1997-09-12	2016-02-22	18.4449	18-20	ZADAR	ZADAR	3	NO	YES	ONE PARENT	174.1
Zadar	ZADAR, Tehnička	ZAD_Gra_Teh	OTHER	1997-07-29	2016-02-22	18.5681	18-20	ZADAR	ZADAR	3	NO	YES	ONE PARENT	188.1
Zadar	ZADAR, Tehnička	ZAD_Gra_Teh	OTHER	1997-04-28	2016-02-22	18.82	18-20	ZADAR	ZADAR	3	NO	YES	ONE PARENT	179.4
Zadar	ZADAR, Tehnička	ZAD_Gra_Teh	OTHER	1997-04-19	2016-02-22	18.8446	18-20	ZADAR	ZADAR	3	YES	NO	ONE PARENT	198
Zadar	ZADAR, Tehnička	ZAD_Gra_Teh	OTHER	1997-01-30	2016-02-22	19.0609	18-20	ZADAR	ZADAR	3	YES	NO	ONE PARENT	178.3
Zadar	ZADAR, Tehnička	ZAD_Gra_Teh	OTHER	1996-08-20	2016-02-22	19.5072	18-20	ZADAR	ZADAR	3	NO	YES	ONE PARENT	196.5

## Sheet: 2_GIRLS (domestic)
Region of the school (Županija)	School	School code	School type	Date of birth	Date of measurement	Age (years)	Age category	Place of residence	County of residence	Population size of the place of residence	University education of parents			Anthropometry
										1 (10 000 ≥)
										2 (10 001 - 25 000)
										3 (> 25 000)	Father	Mother	Total university education of both parents	Body height (cm)	Sitting height (cm)	Arm span (cm)	Relative sitting height (% body height)	Relative arm span (% body height)
Dubrovnik-Neretva	METKOVIĆ, Gimnazija	DUB_Met_Gim	GIMNAZIJA	04.09.1998	2017-02-06	18.4257	18-20	DRAGANIĆ	KARLOVAC	1	NO	NO	NEITHER	164.2
Dubrovnik-Neretva	METKOVIĆ, Gimnazija	DUB_Met_Gim	GIMNAZIJA	05.10.1998	2017-02-06	18.3409	18-20	FRATROVCI OZALJSKI	KARLOVAC	1	NO	NO	NEITHER	169.6	91.6	168.8	54.0094	99.5283
Dubrovnik-Neretva	METKOVIĆ, Gimnazija	DUB_Met_Gim	GIMNAZIJA	14.01.1999	2017-02-06	18.0643	18-20	GALIŽANA	ISTRA	1	NO	NO	NEITHER	166
Dubrovnik-Neretva	METKOVIĆ, Gimnazija	DUB_Met_Gim	GIMNAZIJA	07.05.1998	2017-02-06	18.7543	18-20	KAMENMOST	SPLIT-DALMACIJA	1	NO	NO	NEITHER	174.6
Dubrovnik-Neretva	METKOVIĆ, Gimnazija	DUB_Met_Gim	GIMNAZIJA	06.05.1998	2017-02-06	18.757	18-20	KAMENMOST	SPLIT-DALMACIJA	1	NO	NO	NEITHER	170.5
Dubrovnik-Neretva	METKOVIĆ, Gimnazija	DUB_Met_Gim	GIMNAZIJA	30.09.1998	2017-02-06	18.3546	18-20	KARLOVAC	KARLOVAC	3	NO	NO	NEITHER	171.4	89	169	51.9253	98.5998
Dubrovnik-Neretva	METKOVIĆ, Gimnazija	DUB_Met_Gim	GIMNAZIJA	29.09.1998	2017-02-06	18.3573	18-20	KARLOVAC	KARLOVAC	3	NO	NO	NEITHER	155.8	85.3	155.8	54.7497	100
Dubrovnik-Neretva	METKOVIĆ, Gimnazija	DUB_Met_Gim	GIMNAZIJA	28.09.1998	2017-02-06	18.36	18-20	KARLOVAC	KARLOVAC	3	NO	NO	NEITHER	166.4	91.1	162.2	54.7476	97.476
Dubrovnik-Neretva	METKOVIĆ, Gimnazija	DUB_Met_Gim	GIMNAZIJA	21.09.1998	2017-02-06	18.3792	18-20	KARLOVAC	KARLOVAC	3	NO	NO	NEITHER	167.2	86.6	172.8	51.7943	103.349
Dubrovnik-Neretva	METKOVIĆ, Gimnazija	DUB_Met_Gim	GIMNAZIJA	20.09.1998	2017-02-06	18.3819	18-20	KARLOVAC	KARLOVAC	3	NO	NO	NEITHER	160.1	85.1	156.3	53.1543	97.6265
Dubrovnik-Neretva	METKOVIĆ, Gimnazija	DUB_Met_Gim	GIMNAZIJA	12.09.1998	2017-02-06	18.4038	18-20	KARLOVAC	KARLOVAC	3	NO	YES	ONE PARENT	163	85.6	160.6	52.5153	98.5276
Dubrovnik-Neretva	METKOVIĆ, Gimnazija	DUB_Met_Gim	GIMNAZIJA	24.08.1998	2017-02-06	18.4559	18-20	KARLOVAC	KARLOVAC	3	NO	NO	NEITHER	167.8
Dubrovnik-Neretva	METKOVIĆ, Gimnazija	DUB_Met_Gim	GIMNAZIJA	30.07.1998	2017-02-06	18.5243	18-20	KARLOVAC	KARLOVAC	3	NO	NO	NEITHER	163.2
Dubrovnik-Neretva	METKOVIĆ, Gimnazija	DUB_Met_Gim	GIMNAZIJA	16.07.1998	2017-02-06	18.5626	18-20	KOMARNA	DUBROVNIK-NERETVA	1	NO	NO	NEITHER	174
Dubrovnik-Neretva	METKOVIĆ, Gimnazija	DUB_Met_Gim	GIMNAZIJA	24.10.1998	2017-02-06	18.2888	18-20	LABIN	ISTRA	2	NO	NO	NEITHER	174.9
Dubrovnik-Neretva	METKOVIĆ, Gimnazija	DUB_Met_Gim	GIMNAZIJA	16.04.1998	2017-02-06	18.8118	18-20	MAKARSKA	SPLIT-DALMACIJA	2	NO	NO	NEITHER	165
Dubrovnik-Neretva	METKOVIĆ, Gimnazija	DUB_Met_Gim	GIMNAZIJA	10.07.1998	2017-02-06	18.5791	18-20	OGULIN	KARLOVAC	2	NO	NO	NEITHER	168.6
Dubrovnik-Neretva	METKOVIĆ, Gimnazija	DUB_Met_Gim	GIMNAZIJA	23.06.1998	2017-02-06	18.6256	18-20	OGULIN	KARLOVAC	2	NO	YES	ONE PARENT	168.8
Dubrovnik-Neretva	METKOVIĆ, Gimnazija	DUB_Met_Gim	GIMNAZIJA	19.10.1998	2017-02-06	18.3025	18-20	POREČ	ISTRA	2	NO	NO	NEITHER	169.8
Dubrovnik-Neretva	METKOVIĆ, Gimnazija	DUB_Met_Gim	GIMNAZIJA	10.02.1999	2017-02-06	17.9904	17	PULA	ISTRA	3	NO	NO	NEITHER	166	88.3	163	53.1928	98.1928
Dubrovnik-Neretva	METKOVIĆ, Gimnazija	DUB_Met_Gim	GIMNAZIJA	25.01.1999	2017-02-06	18.0342	18-20	PULA	ISTRA	3	NO	NO	NEITHER	166	91.4	167.5	55.0602	100.904
Dubrovnik-Neretva	METKOVIĆ, Gimnazija	DUB_Met_Gim	GIMNAZIJA	27.11.1998	2017-02-06	18.1958	18-20	PULA	ISTRA	3	NO	NO	NEITHER	176
Dubrovnik-Neretva	METKOVIĆ, Gimnazija	DUB_Met_Gim	GIMNAZIJA	24.11.1998	2017-02-06	18.204	18-20	PULA	ISTRA	3	NO	NO	NEITHER	163	87	165.2	53.3742	101.35
Dubrovnik-Neretva	METKOVIĆ, Gimnazija	DUB_Met_Gim	GIMNAZIJA	15.11.1998	2017-02-06	18.2286	18-20	PULA	ISTRA	3	NO	YES	ONE PARENT	175.2	93.4	175.2	53.3105	100
Dubrovnik-Neretva	METKOVIĆ, Gimnazija	DUB_Met_Gim	GIMNAZIJA	15.10.1998	2017-02-06	18.3135	18-20	PULA	ISTRA	3	NO	NO	NEITHER	160.3
Dubrovnik-Neretva	METKOVIĆ, Gimnazija	DUB_Met_Gim	GIMNAZIJA	11.10.1998	2017-02-06	18.3244	18-20	ROČ	ISTRA	1	NO	NO	NEITHER	178.9
Dubrovnik-Neretva	METKOVIĆ, Gimnazija	DUB_Met_Gim	GIMNAZIJA	17.01.1999	2017-02-06	18.0561	18-20	VODNJAN	ISTRA	1	NO	NO	NEITHER	163.7	89.9	154.5	54.9175	94.38
Dubrovnik-Neretva	METKOVIĆ, Gimnazija	DUB_Met_Gim	GIMNAZIJA	25.07.1998	2017-02-06	18.538	18-20	VOJNIĆ	KARLOVAC	1	NO	NO	NEITHER	164.2
Dubrovnik-Neretva	METKOVIĆ, Gimnazija	DUB_Met_Gim	GIMNAZIJA	26.02.1998	2017-02-06	18.9459	18-20	BISKO	SPLIT-DALMACIJA	1	unavailable	unavailable	unavailable	180.1
Dubrovnik-Neretva	METKOVIĆ, Gimnazija	DUB_Met_Gim	GIMNAZIJA	07.04.1998	2017-02-06	18.8364	18-20	GLAVICE	SPLIT-DALMACIJA	1	unavailable	unavailable	unavailable	163.5
Dubrovnik-Neretva	METKOVIĆ, Gimnazija	DUB_Met_Gim	GIMNAZIJA	04.04.1998	2017-02-06	18.8446	18-20	JABUKA	SPLIT-DALMACIJA	1	unavailable	unavailable	unavailable	171
Dubrovnik-Neretva	METKOVIĆ, Gimnazija	DUB_Met_Gim	GIMNAZIJA	19.02.1998	2017-02-06	18.9651	18-20	MAKARSKA	SPLIT-DALMACIJA	2	unavailable	unavailable	unavailable	155
Dubrovnik-Neretva	METKOVIĆ, Gimnazija	DUB_Met_Gim	GIMNAZIJA	25.10.1998	2017-02-06	18.2861	18-20	BELE	ISTRA	1	YES	YES	BOTH PARENTS	171.4
Dubrovnik-Neretva	METKOVIĆ, Gimnazija	DUB_Met_Gim	GIMNAZIJA	12.09.1998	2017-02-06	18.4038	18-20	KARLOVAC	KARLOVAC	3	YES	NO	ONE PARENT	172.5	91.2	169.2	52.8696	98.087
Dubrovnik-Neretva	METKOVIĆ, Gimnazija	DUB_Met_Gim	GIMNAZIJA	17.08.1998	2017-02-06	18.475	18-20	KARLOVAC	KARLOVAC	3	YES	YES	BOTH PARENTS	169
Dubrovnik-Neretva	METKOVIĆ, Gimnazija	DUB_Met_Gim	GIMNAZIJA	28.07.1998	2017-02-06	18.5298	18-20	OGULIN	KARLOVAC	2	YES	NO	ONE PARENT	160.8
Dubrovnik-Neretva	METKOVIĆ, Gimnazija	DUB_Met_Gim	GIMNAZIJA	14.06.1998	2017-02-06	18.6502	18-20	OGULIN	KARLOVAC	2	YES	NO	ONE PARENT	163.4
Dubrovnik-Neretva	METKOVIĆ, Gimnazija	DUB_Met_Gim	GIMNAZIJA	27.11.1998	2017-02-06	18.1958	18-20	PULA	ISTRA	3	YES	NO	ONE PARENT	172.2
Istra	PULA, Ekonomska	IST_Pula_Ekon	OTHER	1998-10-04	2017-04-05	18.5024	18-20	CEROVAC VUKMANIČKI	KARLOVAC	1	NO	NO	NEITHER	157.2
Istra	PULA, Ekonomska	IST_Pula_Ekon	OTHER	1998-08-02	2017-04-05	18.6749	18-20	GRAČAC	ZADAR	1	NO	NO	NEITHER	161
Istra	PULA, Ekonomska	IST_Pula_Ekon	OTHER	1998-07-06	2017-04-05	18.7488	18-20	IMOTSKI	SPLIT-DALMACIJA	2	NO	NO	NEITHER	171.9
Istra	PULA, Ekonomska	IST_Pula_Ekon	OTHER	1998-11-29	2017-04-05	18.3491	18-20	JUROVSKI BROD	KARLOVAC	1	NO	NO	NEITHER	165.8	87.4	165	52.7141	99.5175
Istra	PULA, Ekonomska	IST_Pula_Ekon	OTHER	1998-11-21	2017-04-05	18.371	18-20	KARLOVAC	KARLOVAC	3	NO	NO	NEITHER	175.5	96.2	173.2	54.8148	98.6895
Istra	PULA, Ekonomska	IST_Pula_Ekon	OTHER	1998-10-28	2017-04-05	18.4367	18-20	KARLOVAC	KARLOVAC	3	NO	NO	NEITHER	172.7
Istra	PULA, Ekonomska	IST_Pula_Ekon	OTHER	1998-10-15	2017-04-05	18.4723	18-20	KARLOVAC	KARLOVAC	3	NO	NO	NEITHER	153.5
Istra	PULA, Ekonomska	IST_Pula_Ekon	OTHER	1998-09-27	2017-04-05	18.5216	18-20	KARLOVAC	KARLOVAC	3	NO	NO	NEITHER	164
Istra	PULA, Ekonomska	IST_Pula_Ekon	OTHER	1998-09-27	2017-04-05	18.5216	18-20	KARLOVAC	KARLOVAC	3	NO	NO	NEITHER	163.1
Istra	PULA, Ekonomska	IST_Pula_Ekon	OTHER	1998-09-26	2017-04-05	18.5243	18-20	KARLOVAC	KARLOVAC	3	NO	NO	NEITHER	164.3
Istra	PULA, Ekonomska	IST_Pula_Ekon	OTHER	1998-09-10	2017-04-05	18.5681	18-20	KARLOVAC	KARLOVAC	3	NO	NO	NEITHER	166.4
Istra	PULA, Ekonomska	IST_Pula_Ekon	OTHER	1998-09-08	2017-04-05	18.5736	18-20	KARLOVAC	KARLOVAC	3	NO	NO	NEITHER	166.6
Istra	PULA, Ekonomska	IST_Pula_Ekon	OTHER	1998-07-29	2017-04-05	18.6858	18-20	KORENICA	LIKA-SENJ	1	NO	NO	NEITHER	175
Istra	PULA, Ekonomska	IST_Pula_Ekon	OTHER	1998-12-05	2017-04-05	18.3326	18-20	KRŠAN	ISTRA	1	NO	NO	NEITHER	160	85.4	157.8	53.375	98.625
Istra	PULA, Ekonomska	IST_Pula_Ekon	OTHER	1998-07-22	2017-04-05	18.705	18-20	LIČKI OSIK	LIKA-SENJ	1	NO	NO	NEITHER	162
Istra	PULA, Ekonomska	IST_Pula_Ekon	OTHER	1998-12-19	2017-04-05	18.2943	18-20	MEDULIN	ISTRA	1	NO	NO	NEITHER	178.7
Istra	PULA, Ekonomska	IST_Pula_Ekon	OTHER	1998-08-21	2017-04-05	18.6229	18-20	OGULIN	KARLOVAC	2	NO	NO	NEITHER	159.5
Istra	PULA, Ekonomska	IST_Pula_Ekon	OTHER	1998-09-22	2017-04-05	18.5352	18-20	PAŠIN POTOK	KARLOVAC	1	NO	NO	NEITHER	161.2
Istra	PULA, Ekonomska	IST_Pula_Ekon	OTHER	1999-03-25	2017-04-05	18.0315	18-20	PULA	ISTRA	3	NO	NO	NEITHER	154.5	81.1	159.4	52.4919	103.172
Istra	PULA, Ekonomska	IST_Pula_Ekon	OTHER	1999-03-22	2017-04-05	18.0397	18-20	PULA	ISTRA	3	NO	NO	NEITHER	166.8	90.2	165.2	54.0767	99.0408
Istra	PULA, Ekonomska	IST_Pula_Ekon	OTHER	1999-03-18	2017-04-05	18.0507	18-20	PULA	ISTRA	3	NO	YES	ONE PARENT	181	96.3	177	53.2044	97.7901
Istra	PULA, Ekonomska	IST_Pula_Ekon	OTHER	1999-03-06	2017-04-05	18.0835	18-20	PULA	ISTRA	3	NO	NO	NEITHER	166.6
Istra	PULA, Ekonomska	IST_Pula_Ekon	OTHER	1999-02-19	2017-04-05	18.1246	18-20	PULA	ISTRA	3	NO	YES	ONE PARENT	162.6
Istra	PULA, Ekonomska	IST_Pula_Ekon	OTHER	1999-02-12	2017-04-05	18.1437	18-20	PULA	ISTRA	3	NO	NO	NEITHER	156.3
Istra	PULA, Ekonomska	IST_Pula_Ekon	OTHER	1999-01-01	2017-04-05	18.2587	18-20	PULA	ISTRA	3	NO	NO	NEITHER	168
Istra	PULA, Ekonomska	IST_Pula_Ekon	OTHER	1998-12-30	2017-04-05	18.2642	18-20	PULA	ISTRA	3	NO	NO	NEITHER	165.5
Istra	PULA, Ekonomska	IST_Pula_Ekon	OTHER	1999-01-10	2017-04-05	18.2341	18-20	RAŠA	ISTRA	1	NO	YES	ONE PARENT	160.4	84.9	160.5	52.9302	100.062
Istra	PULA, Ekonomska	IST_Pula_Ekon	OTHER	1998-12-07	2017-04-05	18.3272	18-20	ROVINJ	ISTRA	2	NO	NO	NEITHER	170.6
Istra	PULA, Ekonomska	IST_Pula_Ekon	OTHER	1998-08-09	2017-04-05	18.6557	18-20	SABORSKO	KARLOVAC	1	NO	NO	NEITHER	159.2
Istra	PULA, Ekonomska	IST_Pula_Ekon	OTHER	1998-07-26	2017-04-05	18.694	18-20	SMOLJANAC	LIKA-SENJ	1	NO	NO	NEITHER	180.2
Istra	PULA, Ekonomska	IST_Pula_Ekon	OTHER	1998-09-21	2017-04-05	18.538	18-20	VUKŠIN ŠIPAK	KARLOVAC	1	NO	NO	NEITHER	167.7
Istra	PULA, Ekonomska	IST_Pula_Ekon	OTHER	1998-06-22	2017-04-05	18.7871	18-20	ZMIJAVCI	SPLIT-DALMACIJA	1	NO	NO	NEITHER	171.3
Istra	PULA, Ekonomska	IST_Pula_Ekon	OTHER	1998-11-02	2017-04-05	18.423	18-20	ŽAKANJE	KARLOVAC	1	NO	NO	NEITHER	167.3	87.2	175.5	52.1219	104.901
Istra	PULA, Ekonomska	IST_Pula_Ekon	OTHER	1998-06-07	2017-04-05	18.8282	18-20	ČAČIJIN DOLAC	ŠIBENIK-KNIN	1	unavailable	unavailable	unavailable	170
Istra	PULA, Ekonomska	IST_Pula_Ekon	OTHER	1998-06-01	2017-04-05	18.8446	18-20	JABUKA	SPLIT-DALMACIJA	1	unavailable	unavailable	unavailable	169.4
Istra	PULA, Ekonomska	IST_Pula_Ekon	OTHER	1998-03-07	2017-04-05	19.0801	18-20	KNIN	ŠIBENIK-KNIN	2	unavailable	unavailable	unavailable	160
Istra	PULA, Ekonomska	IST_Pula_Ekon	OTHER	1998-05-31	2017-04-05	18.8474	18-20	MALJKOVO	SPLIT-DALMACIJA	1	unavailable	unavailable	unavailable	163.4
Istra	PULA, Ekonomska	IST_Pula_Ekon	OTHER	1998-04-15	2017-04-05	18.9733	18-20	OTOK	SPLIT-DALMACIJA	1	unavailable	unavailable	unavailable	169.8
Istra	PULA, Ekonomska	IST_Pula_Ekon	OTHER	1998-04-04	2017-04-05	19.0034	18-20	SPLIT	SPLIT-DALMACIJA	3	unavailable	unavailable	unavailable	166.9
Istra	PULA, Ekonomska	IST_Pula_Ekon	OTHER	1998-01-14	2017-04-05	19.2225	18-20	ŠIBENIK	ŠIBENIK-KNIN	3	unavailable	unavailable	unavailable	169.7
Istra	PULA, Ekonomska	IST_Pula_Ekon	OTHER	1998-05-11	2017-04-05	18.9021	18-20	TRILJ	SPLIT-DALMACIJA	1	unavailable	unavailable	unavailable	161.9
Istra	PULA, Ekonomska	IST_Pula_Ekon	OTHER	1998-03-26	2017-04-05	19.0281	18-20	TRILJ	SPLIT-DALMACIJA	1	unavailable	unavailable	unavailable	166.1
Istra	PULA, Ekonomska	IST_Pula_Ekon	OTHER	1998-03-23	2017-04-05	19.0363	18-20	VRGORAC	SPLIT-DALMACIJA	1	unavailable	unavailable	unavailable	179.1
Istra	PULA, Ekonomska	IST_Pula_Ekon	OTHER	1998-08-31	2017-04-05	18.5955	18-20	DONJI VELEMERIĆ	KARLOVAC	1	YES	YES	BOTH PARENTS	167.5	88	166.7	52.5373	99.5224
Istra	PULA, Ekonomska	IST_Pula_Ekon	OTHER	1998-07-05	2017-04-05	18.7515	18-20	IMOTSKI	SPLIT-DALMACIJA	2	YES	YES	BOTH PARENTS	168.5
Istra	PULA, Ekonomska	IST_Pula_Ekon	OTHER	1998-10-18	2017-04-05	18.4641	18-20	KARLOVAC	KARLOVAC	3	YES	NO	ONE PARENT	168.5
Istra	PULA, Ekonomska	IST_Pula_Ekon	OTHER	1999-12-01	2017-04-05	17.3443	17	METKOVIĆ	DUBROVNIK-NERETVA	2	YES	YES	BOTH PARENTS	169.5
Istra	PULA, Ekonomska	IST_Pula_Ekon	OTHER	1998-08-11	2017-04-05	18.6502	18-20	OŠTARIJE	KARLOVAC	1	YES	NO	ONE PARENT	177
Istra	PULA, Ekonomska	IST_Pula_Ekon	OTHER	1999-03-18	2017-04-05	18.0507	18-20	PULA	ISTRA	3	YES	YES	BOTH PARENTS	167.5	89.5	163.3	53.4328	97.4925
Istra	PULA, Ekonomska	IST_Pula_Ekon	OTHER	1999-03-01	2017-04-05	18.0972	18-20	PULA	ISTRA	3	YES	YES	BOTH PARENTS	169.4
Istra	PULA, Ekonomska	IST_Pula_Ekon	OTHER	1999-02-05	2017-04-05	18.1629	18-20	PULA	ISTRA	3	YES	YES	BOTH PARENTS	159.9
Istra	PULA, Ekonomska	IST_Pula_Ekon	OTHER	1999-02-02	2017-04-05	18.1711	18-20	PULA	ISTRA	3	YES	YES	BOTH PARENTS	170.4
Istra	PULA, Ekonomska	IST_Pula_Ekon	OTHER	1997-09-24	2017-04-05	19.5291	18-20	ROGOZNICA	ŠIBENIK-KNIN	1	YES	NO	ONE PARENT	163.3
Istra	PULA, Gimnazija	IST_Pula_Gim	GIMNAZIJA	1998-09-21	2017-04-05	18.538	18-20	BELAJSKE POLJICE	KARLOVAC	1	NO	NO	NEITHER	158
Istra	PULA, Gimnazija	IST_Pula_Gim	GIMNAZIJA	1998-08-09	2017-04-05	18.6557	18-20	DONJE ROZARIŠTE	LIKA-SENJ	1	NO	NO	NEITHER	167.9
Istra	PULA, Gimnazija	IST_Pula_Gim	GIMNAZIJA	1998-12-03	2017-04-05	18.3381	18-20	DUGA RESA	KARLOVAC	2	NO	NO	NEITHER	161.4	87.3	155.7	54.0892	96.4684
Istra	PULA, Gimnazija	IST_Pula_Gim	GIMNAZIJA	1998-09-14	2017-04-05	18.5572	18-20	DUGA RESA	KARLOVAC	2	NO	NO	NEITHER	157.8
Istra	PULA, Gimnazija	IST_Pula_Gim	GIMNAZIJA	1998-08-29	2017-04-05	18.601	18-20	DUGA RESA	KARLOVAC	2	NO	NO	NEITHER	170.6	90.8	165	53.2239	96.7175
Istra	PULA, Gimnazija	IST_Pula_Gim	GIMNAZIJA	1998-12-01	2017-04-05	18.3436	18-20	GENERALSKI STOL	KARLOVAC	1	NO	NO	NEITHER	167.3	88.7	164.4	53.0185	98.2666
Istra	PULA, Gimnazija	IST_Pula_Gim	GIMNAZIJA	1998-06-24	2017-04-05	18.7817	18-20	GLAVINA DONJA	SPLIT-DALMACIJA	1	NO	NO	NEITHER	165.2
Istra	PULA, Gimnazija	IST_Pula_Gim	GIMNAZIJA	1998-08-06	2017-04-05	18.6639	18-20	GOSPIĆ	LIKA-SENJ	2	NO	NO	NEITHER	166.2
Istra	PULA, Gimnazija	IST_Pula_Gim	GIMNAZIJA	1999-05-09	2017-04-05	17.9083	17	HRBOKI	ISTRA	1	NO	NO	NEITHER	161.3	87	167	53.9368	103.534
Istra	PULA, Gimnazija	IST_Pula_Gim	GIMNAZIJA	1998-07-06	2017-04-05	18.7488	18-20	IMOTSKI	SPLIT-DALMACIJA	2	NO	NO	NEITHER	168.1
Istra	PULA, Gimnazija	IST_Pula_Gim	GIMNAZIJA	1998-09-30	2017-04-05	18.5133	18-20	JELAŠI	KARLOVAC	1	NO	NO	NEITHER	159.8
Istra	PULA, Gimnazija	IST_Pula_Gim	GIMNAZIJA	1998-11-16	2017-04-05	18.3847	18-20	KARLOVAC	KARLOVAC	3	NO	NO	NEITHER	160.1	89.8	157.1	56.0899	98.1262
Istra	PULA, Gimnazija	IST_Pula_Gim	GIMNAZIJA	1998-11-07	2017-04-05	18.4093	18-20	KARLOVAC	KARLOVAC	3	NO	NO	NEITHER	178.4	87	179.7	48.7668	100.729
Istra	PULA, Gimnazija	IST_Pula_Gim	GIMNAZIJA	1998-10-18	2017-04-05	18.4641	18-20	KARLOVAC	KARLOVAC	3	NO	NO	NEITHER	173.3
Istra	PULA, Gimnazija	IST_Pula_Gim	GIMNAZIJA	1998-10-16	2017-04-05	18.4695	18-20	KARLOVAC	KARLOVAC	3	NO	YES	ONE PARENT	166.7
Istra	PULA, Gimnazija	IST_Pula_Gim	GIMNAZIJA	1998-10-12	2017-04-05	18.4805	18-20	KARLOVAC	KARLOVAC	3	NO	NO	NEITHER	160.4
Istra	PULA, Gimnazija	IST_Pula_Gim	GIMNAZIJA	1998-10-11	2017-04-05	18.4832	18-20	KARLOVAC	KARLOVAC	3	NO	NO	NEITHER	172.5
Istra	PULA, Gimnazija	IST_Pula_Gim	GIMNAZIJA	1998-10-09	2017-04-05	18.4887	18-20	KARLOVAC	KARLOVAC	3	NO	NO	NEITHER	169.7
Istra	PULA, Gimnazija	IST_Pula_Gim	GIMNAZIJA	1998-09-28	2017-04-05	18.5188	18-20	KARLOVAC	KARLOVAC	3	NO	NO	NEITHER	168.7
Istra	PULA, Gimnazija	IST_Pula_Gim	GIMNAZIJA	1998-09-27	2017-04-05	18.5216	18-20	KARLOVAC	KARLOVAC	3	NO	NO	NEITHER	159.4
Istra	PULA, Gimnazija	IST_Pula_Gim	GIMNAZIJA	1998-09-27	2017-04-05	18.5216	18-20	KARLOVAC	KARLOVAC	3	NO	NO	NEITHER	159.3
Istra	PULA, Gimnazija	IST_Pula_Gim	GIMNAZIJA	1998-09-09	2017-04-05	18.5708	18-20	KARLOVAC	KARLOVAC	3	NO	NO	NEITHER	170.1
Istra	PULA, Gimnazija	IST_Pula_Gim	GIMNAZIJA	1998-09-03	2017-04-05	18.5873	18-20	KARLOVAC	KARLOVAC	3	NO	NO	NEITHER	164.5	88	163	53.4954	99.0881
Istra	PULA, Gimnazija	IST_Pula_Gim	GIMNAZIJA	1998-08-01	2017-04-05	18.6776	18-20	KORENICA	LIKA-SENJ	1	NO	NO	NEITHER	167.7
Istra	PULA, Gimnazija	IST_Pula_Gim	GIMNAZIJA	1998-07-29	2017-04-05	18.6858	18-20	KORENICA	LIKA-SENJ	1	NO	NO	NEITHER	163.2
Istra	PULA, Gimnazija	IST_Pula_Gim	GIMNAZIJA	1998-07-28	2017-04-05	18.6886	18-20	KORENICA	LIKA-SENJ	1	NO	NO	NEITHER	169.7
Istra	PULA, Gimnazija	IST_Pula_Gim	GIMNAZIJA	1998-08-03	2017-04-05	18.6721	18-20	LIČKI OSIK	LIKA-SENJ	1	NO	NO	NEITHER	160.6
Istra	PULA, Gimnazija	IST_Pula_Gim	GIMNAZIJA	1998-09-25	2017-04-05	18.527	18-20	LIPOV PESAK	KARLOVAC	1	NO	NO	NEITHER	162.5
Istra	PULA, Gimnazija	IST_Pula_Gim	GIMNAZIJA	1998-06-21	2017-04-05	18.7899	18-20	MAKARSKA	SPLIT-DALMACIJA	2	NO	NO	NEITHER	172.3
Istra	PULA, Gimnazija	IST_Pula_Gim	GIMNAZIJA	1998-06-16	2017-04-05	18.8036	18-20	MAKARSKA	SPLIT-DALMACIJA	2	NO	NO	NEITHER	163.1
Istra	PULA, Gimnazija	IST_Pula_Gim	GIMNAZIJA	1998-06-15	2017-04-05	18.8063	18-20	MAKARSKA	SPLIT-DALMACIJA	2	NO	NO	NEITHER	180
Istra	PULA, Gimnazija	IST_Pula_Gim	GIMNAZIJA	1999-03-11	2017-04-05	18.0698	18-20	MARČANA	ISTRA	1	NO	NO	NEITHER	154.4
Istra	PULA, Gimnazija	IST_Pula_Gim	GIMNAZIJA	1999-03-10	2017-04-05	18.0726	18-20	MATELIĆI	ISTRA	1	NO	YES	ONE PARENT	162.9
Istra	PULA, Gimnazija	IST_Pula_Gim	GIMNAZIJA	1999-07-24	2017-04-05	17.7002	17	METKOVIĆ	DUBROVNIK-NERETVA	2	NO	NO	NEITHER	164.5
Istra	PULA, Gimnazija	IST_Pula_Gim	GIMNAZIJA	1998-11-05	2017-04-05	18.4148	18-20	MREŽNIČKI BRIG	KARLOVAC	1	NO	NO	NEITHER	172.8	87.5	171.4	50.6366	99.1898
Istra	PULA, Gimnazija	IST_Pula_Gim	GIMNAZIJA	1999-06-16	2017-04-05	17.8042	17	NEUM	DUBROVNIK-NERETVA	1	NO	NO	NEITHER	171.4
Istra	PULA, Gimnazija	IST_Pula_Gim	GIMNAZIJA	1998-08-14	2017-04-05	18.642	18-20	OGULIN	KARLOVAC	2	NO	NO	NEITHER	164.1
Istra	PULA, Gimnazija	IST_Pula_Gim	GIMNAZIJA	1998-08-10	2017-04-05	18.653	18-20	PLAŠCI	KARLOVAC	1	NO	NO	NEITHER	170.1
Istra	PULA, Gimnazija	IST_Pula_Gim	GIMNAZIJA	1999-04-29	2017-04-05	17.9357	17	PREMANTURA	ISTRA	1	NO	YES	ONE PARENT	164.1	86	168	52.4071	102.377
Istra	PULA, Gimnazija	IST_Pula_Gim	GIMNAZIJA	1999-04-12	2017-04-05	17.9822	17	PULA	ISTRA	3	NO	NO	NEITHER	169.4	87.5	168.1	51.6529	99.2326
Istra	PULA, Gimnazija	IST_Pula_Gim	GIMNAZIJA	1999-03-29	2017-04-05	18.0205	18-20	PULA	ISTRA	3	NO	NO	NEITHER	163.6	89.5	165.2	54.7066	100.978
Istra	PULA, Gimnazija	IST_Pula_Gim	GIMNAZIJA	1999-03-21	2017-04-05	18.0424	18-20	PULA	ISTRA	3	NO	YES	ONE PARENT	169.3	97.7	167.6	57.7082	98.9959
Istra	PULA, Gimnazija	IST_Pula_Gim	GIMNAZIJA	1999-02-25	2017-04-05	18.1081	18-20	PULA	ISTRA	3	NO	YES	ONE PARENT	167.5
Istra	PULA, Gimnazija	IST_Pula_Gim	GIMNAZIJA	1999-02-24	2017-04-05	18.1109	18-20	PULA	ISTRA	3	NO	YES	ONE PARENT	172
Istra	PULA, Gimnazija	IST_Pula_Gim	GIMNAZIJA	1999-02-15	2017-04-05	18.1355	18-20	PULA	ISTRA	3	NO	NO	NEITHER	173.2
Istra	PULA, Gimnazija	IST_Pula_Gim	GIMNAZIJA	1999-02-10	2017-04-05	18.1492	18-20	PULA	ISTRA	3	NO	YES	ONE PARENT	160
Istra	PULA, Gimnazija	IST_Pula_Gim	GIMNAZIJA	1999-02-10	2017-04-05	18.1492	18-20	PULA	ISTRA	3	NO	YES	ONE PARENT	169.2
Istra	PULA, Gimnazija	IST_Pula_Gim	GIMNAZIJA	1999-01-25	2017-04-05	18.193	18-20	PULA	ISTRA	3	NO	NO	NEITHER	157.1
Istra	PULA, Gimnazija	IST_Pula_Gim	GIMNAZIJA	1999-01-20	2017-04-05	18.2067	18-20	PULA	ISTRA	3	NO	NO	NEITHER	162.6	85.4	159.7	52.5215	98.2165
Istra	PULA, Gimnazija	IST_Pula_Gim	GIMNAZIJA	1999-01-12	2017-04-05	18.2286	18-20	PULA	ISTRA	3	NO	NO	NEITHER	176.5	96.1	176.7	54.4476	100.113
Istra	PULA, Gimnazija	IST_Pula_Gim	GIMNAZIJA	1998-12-28	2017-04-05	18.2697	18-20	PULA	ISTRA	3	NO	NO	NEITHER	168.6
Istra	PULA, Gimnazija	IST_Pula_Gim	GIMNAZIJA	1998-12-05	2017-04-05	18.3326	18-20	PULA	ISTRA	3	NO	NO	NEITHER	162.2	83.8	166.5	51.6646	102.651
Istra	PULA, Gimnazija	IST_Pula_Gim	GIMNAZIJA	1998-12-05	2017-04-05	18.3326	18-20	PULA	ISTRA	3	NO	YES	ONE PARENT	159.5	85.3	159.3	53.4796	99.8746
Istra	PULA, Gimnazija	IST_Pula_Gim	GIMNAZIJA	1998-11-03	2017-04-05	18.4203	18-20	REČICA	KARLOVAC	1	NO	NO	NEITHER	162.6	86	160.6	52.8905	98.77
Istra	PULA, Gimnazija	IST_Pula_Gim	GIMNAZIJA	1998-09-02	2017-04-05	18.59	18-20	VOJNIĆ	KARLOVAC	1	NO	NO	NEITHER	168	84.5	177.1	50.2976	105.417
Istra	PULA, Gimnazija	IST_Pula_Gim	GIMNAZIJA	1998-07-12	2017-04-05	18.7324	18-20	VRHOVINE	LIKA-SENJ	1	NO	YES	ONE PARENT	163.3
Istra	PULA, Gimnazija	IST_Pula_Gim	GIMNAZIJA	1998-06-08	2017-04-05	18.8255	18-20	BRNAZE	SPLIT-DALMACIJA	1	unavailable	unavailable	unavailable	167.4
Istra	PULA, Gimnazija	IST_Pula_Gim	GIMNAZIJA	1998-03-18	2017-04-05	19.05	18-20	GREBAŠTICA	ŠIBENIK-KNIN	1	unavailable	unavailable	unavailable	178.9
Istra	PULA, Gimnazija	IST_Pula_Gim	GIMNAZIJA	1998-05-01	2017-04-05	18.9295	18-20	JASENSKO	SPLIT-DALMACIJA	1	unavailable	unavailable	unavailable	174
Istra	PULA, Gimnazija	IST_Pula_Gim	GIMNAZIJA	1998-06-01	2017-04-05	18.8446	18-20	KARAKAŠICA	SPLIT-DALMACIJA	1	unavailable	unavailable	unavailable	163.3
Istra	PULA, Gimnazija	IST_Pula_Gim	GIMNAZIJA	1998-05-01	2017-04-05	18.9295	18-20	KARAKAŠICA	SPLIT-DALMACIJA	1	unavailable	unavailable	unavailable	168.4
Istra	PULA, Gimnazija	IST_Pula_Gim	GIMNAZIJA	1998-05-31	2017-04-05	18.8474	18-20	OTOK	SPLIT-DALMACIJA	1	unavailable	unavailable	unavailable	174.2
Istra	PULA, Gimnazija	IST_Pula_Gim	GIMNAZIJA	1998-04-10	2017-04-05	18.987	18-20	SINJ	SPLIT-DALMACIJA	2	unavailable	unavailable	unavailable	170.4
Istra	PULA, Gimnazija	IST_Pula_Gim	GIMNAZIJA	1998-04-05	2017-04-05	19.0007	18-20	SPLIT	SPLIT-DALMACIJA	3	unavailable	unavailable	unavailable	172.4
Istra	PULA, Gimnazija	IST_Pula_Gim	GIMNAZIJA	1998-01-05	2017-04-05	19.2471	18-20	ŠIBENIK	ŠIBENIK-KNIN	3	unavailable	unavailable	unavailable	168.7
Istra	PULA, Gimnazija	IST_Pula_Gim	GIMNAZIJA	1998-05-17	2017-04-05	18.8857	18-20	TRILJ	SPLIT-DALMACIJA	1	unavailable	unavailable	unavailable	162.5
Istra	PULA, Gimnazija	IST_Pula_Gim	GIMNAZIJA	1998-05-17	2017-04-05	18.8857	18-20	TRILJ	SPLIT-DALMACIJA	1	unavailable	unavailable	unavailable	166.4
Istra	PULA, Gimnazija	IST_Pula_Gim	GIMNAZIJA	1998-05-06	2017-04-05	18.9158	18-20	UGLJANE	SPLIT-DALMACIJA	1	unavailable	unavailable	unavailable	164.8
Istra	PULA, Gimnazija	IST_Pula_Gim	GIMNAZIJA	1998-11-02	2017-04-05	18.423	18-20	BANSKI KOVAČEVAC	KARLOVAC	1	YES	YES	BOTH PARENTS	174.9
Istra	PULA, Gimnazija	IST_Pula_Gim	GIMNAZIJA	1998-06-22	2017-04-05	18.7871	18-20	BAŠKA VODA	SPLIT-DALMACIJA	1	YES	NO	ONE PARENT	175.8
Istra	PULA, Gimnazija	IST_Pula_Gim	GIMNAZIJA	1999-03-14	2017-04-05	18.0616	18-20	EMOVA GIPULA	ISTRA	1	YES	NO	ONE PARENT	163
Istra	PULA, Gimnazija	IST_Pula_Gim	GIMNAZIJA	1998-12-22	2017-04-05	18.2861	18-20	FAŽANA	ISTRA	1	YES	NO	ONE PARENT	160.1
Istra	PULA, Gimnazija	IST_Pula_Gim	GIMNAZIJA	1998-07-06	2017-04-05	18.7488	18-20	IMOTSKI	SPLIT-DALMACIJA	2	YES	NO	ONE PARENT	179.6
Istra	PULA, Gimnazija	IST_Pula_Gim	GIMNAZIJA	1998-11-27	2017-04-05	18.3546	18-20	KARLOVAC	KARLOVAC	3	YES	NO	ONE PARENT	164	86	167.4	52.439	102.073
Istra	PULA, Gimnazija	IST_Pula_Gim	GIMNAZIJA	1998-11-24	2017-04-05	18.3628	18-20	KARLOVAC	KARLOVAC	3	YES	NO	ONE PARENT	159.9	86.5	164.4	54.0963	102.814
Istra	PULA, Gimnazija	IST_Pula_Gim	GIMNAZIJA	1998-11-09	2017-04-05	18.4038	18-20	KARLOVAC	KARLOVAC	3	YES	YES	BOTH PARENTS	155	84	147.8	54.1935	95.3548
Istra	PULA, Gimnazija	IST_Pula_Gim	GIMNAZIJA	1998-10-28	2017-04-05	18.4367	18-20	KARLOVAC	KARLOVAC	3	YES	YES	BOTH PARENTS	172.4
Istra	PULA, Gimnazija	IST_Pula_Gim	GIMNAZIJA	1998-10-27	2017-04-05	18.4394	18-20	KARLOVAC	KARLOVAC	3	YES	YES	BOTH PARENTS	175
Istra	PULA, Gimnazija	IST_Pula_Gim	GIMNAZIJA	1998-10-12	2017-04-05	18.4805	18-20	KARLOVAC	KARLOVAC	3	YES	NO	ONE PARENT	172
Istra	PULA, Gimnazija	IST_Pula_Gim	GIMNAZIJA	1998-10-10	2017-04-05	18.486	18-20	KARLOVAC	KARLOVAC	3	YES	YES	BOTH PARENTS	166.4
Istra	PULA, Gimnazija	IST_Pula_Gim	GIMNAZIJA	1998-06-12	2017-04-05	18.8145	18-20	MAKARSKA	SPLIT-DALMACIJA	2	YES	YES	BOTH PARENTS	165.1
Istra	PULA, Gimnazija	IST_Pula_Gim	GIMNAZIJA	1998-08-17	2017-04-05	18.6338	18-20	OGULIN	KARLOVAC	2	YES	NO	ONE PARENT	170
Istra	PULA, Gimnazija	IST_Pula_Gim	GIMNAZIJA	1999-04-01	2017-04-05	18.0123	18-20	PULA	ISTRA	3	YES	YES	BOTH PARENTS	156.1	86.7	149.8	55.5413	95.9641
Istra	PULA, Gimnazija	IST_Pula_Gim	GIMNAZIJA	1999-03-22	2017-04-05	18.0397	18-20	PULA	ISTRA	3	YES	YES	BOTH PARENTS	169.9	91.6	171.2	53.9141	100.765
Istra	PULA, Gimnazija	IST_Pula_Gim	GIMNAZIJA	1999-02-23	2017-04-05	18.1136	18-20	PULA	ISTRA	3	YES	NO	ONE PARENT	163.6
Istra	PULA, Gimnazija	IST_Pula_Gim	GIMNAZIJA	1999-02-16	2017-04-05	18.1328	18-20	PULA	ISTRA	3	YES	YES	BOTH PARENTS	166.5
Istra	PULA, Gimnazija	IST_Pula_Gim	GIMNAZIJA	1999-02-07	2017-04-05	18.1574	18-20	PULA	ISTRA	3	YES	YES	BOTH PARENTS	153.3
Istra	PULA, Gimnazija	IST_Pula_Gim	GIMNAZIJA	1999-01-11	2017-04-05	18.2313	18-20	PULA	ISTRA	3	YES	YES	BOTH PARENTS	168.5	87.5	166	51.9288	98.5163
Istra	PULA, Gimnazija	IST_Pula_Gim	GIMNAZIJA	1998-12-24	2017-04-05	18.2806	18-20	PULA	ISTRA	3	YES	YES	BOTH PARENTS	164.4
Istra	PULA, Gimnazija	IST_Pula_Gim	GIMNAZIJA	1998-12-23	2017-04-05	18.2834	18-20	PULA	ISTRA	3	YES	YES	BOTH PARENTS	167
Istra	PULA, Gimnazija	IST_Pula_Gim	GIMNAZIJA	1998-12-16	2017-04-05	18.3025	18-20	PULA	ISTRA	3	YES	YES	BOTH PARENTS	171.9
Istra	PULA, Gimnazija	IST_Pula_Gim	GIMNAZIJA	1999-03-17	2017-04-05	18.0534	18-20	VALBANDON	ISTRA	1	YES	YES	BOTH PARENTS	174.4	91.2	180.2	52.2936	103.326
Istra	PULA, Medicinska	IST_Pula_Med	OTHER	1997-07-04	2017-04-06	19.7563	18-20	GRAČAC	ZADAR	1	NO	NO	NEITHER	164.5
Istra	PULA, Medicinska	IST_Pula_Med	OTHER	1997-06-01	2017-04-06	19.8467	18-20	GRAČAC	ZADAR	1	NO	NO	NEITHER	169.9
Istra	PULA, Medicinska	IST_Pula_Med	OTHER	1997-03-31	2017-04-06	20.0164	18-20	GRAČAC	ZADAR	1	NO	NO	NEITHER	168.5
Istra	PULA, Medicinska	IST_Pula_Med	OTHER	1998-11-18	2017-04-06	18.3819	18-20	KARLOVAC	KARLOVAC	3	NO	NO	NEITHER	155.3	83	160	53.4449	103.026
Istra	PULA, Medicinska	IST_Pula_Med	OTHER	1997-10-03	2017-04-06	19.5072	18-20	KNIN	ŠIBENIK-KNIN	2	NO	NO	NEITHER	161.9
Istra	PULA, Medicinska	IST_Pula_Med	OTHER	1999-03-23	2017-04-06	18.0397	18-20	PULA	ISTRA	3	NO	NO	NEITHER	166	90.2	165.4	54.3373	99.6386
Istra	PULA, Medicinska	IST_Pula_Med	OTHER	1999-01-28	2017-04-06	18.1875	18-20	PULA	ISTRA	3	NO	YES	ONE PARENT	179.8
Istra	PULA, Medicinska	IST_Pula_Med	OTHER	1999-01-14	2017-04-06	18.2259	18-20	PULA	ISTRA	3	NO	YES	ONE PARENT	164.5	90.1	163.4	54.772	99.3313
Istra	PULA, Medicinska	IST_Pula_Med	OTHER	1996-07-21	2017-04-06	20.7091	18-20	SRB	ZADAR	1	NO	NO	NEITHER	151.4
Istra	PULA, Medicinska	IST_Pula_Med	OTHER	1999-01-25	2017-04-06	18.1958	18-20	SV. KIRIN	ISTRA	1	NO	YES	ONE PARENT	164.3
Istra	PULA, Medicinska	IST_Pula_Med	OTHER	1996-06-08	2017-04-06	20.8268	18-20	ŠTIKADA	LIKA-SENJ	1	NO	NO	NEITHER	166
Istra	PULA, Medicinska	IST_Pula_Med	OTHER	1998-12-07	2017-04-06	18.3299	18-20	VODNJAN	ISTRA	1	NO	YES	ONE PARENT	173.4
Istra	PULA, Medicinska	IST_Pula_Med	OTHER	1998-12-24	2017-04-06	18.2834	18-20	VRSAR	ISTRA	1	NO	NO	NEITHER	171.2
Istra	PULA, Medicinska	IST_Pula_Med	OTHER	1998-05-01	2017-04-06	18.9322	18-20	KOŠUTE	SPLIT-DALMACIJA	1	unavailable	unavailable	unavailable	162.3
Istra	PULA, Medicinska	IST_Pula_Med	OTHER	1998-05-31	2017-04-06	18.8501	18-20	OTOK	SPLIT-DALMACIJA	1	unavailable	unavailable	unavailable	162.3
Istra	PULA, Medicinska	IST_Pula_Med	OTHER	1998-02-24	2017-04-06	19.1129	18-20	ROGOZNICA	ŠIBENIK-KNIN	1	unavailable	unavailable	unavailable	173.5
Istra	PULA, Medicinska	IST_Pula_Med	OTHER	1998-04-09	2017-04-06	18.9925	18-20	SPLIT	SPLIT-DALMACIJA	3	unavailable	unavailable	unavailable	161.9
Istra	PULA, Medicinska	IST_Pula_Med	OTHER	1998-02-10	2017-04-06	19.1513	18-20	ŠIBENIK	ŠIBENIK-KNIN	3	unavailable	unavailable	unavailable	160.4
Istra	PULA, Medicinska	IST_Pula_Med	OTHER	1998-01-01	2017-04-06	19.2608	18-20	ŠIBENIK	ŠIBENIK-KNIN	3	unavailable	unavailable	unavailable	167.8
Istra	PULA, Medicinska	IST_Pula_Med	OTHER	1998-05-08	2017-04-06	18.9131	18-20	TURJACI	SPLIT-DALMACIJA	1	unavailable	unavailable	unavailable	161.9
Istra	PULA, Medicinska	IST_Pula_Med	OTHER	1998-05-06	2017-04-06	18.9185	18-20	VRLIKA	SPLIT-DALMACIJA	1	unavailable	unavailable	unavailable	162.5
Istra	PULA, Medicinska	IST_Pula_Med	OTHER	1998-05-06	2017-04-06	18.9185	18-20	VRLIKA	SPLIT-DALMACIJA	1	unavailable	unavailable	unavailable	173.5
Istra	PULA, Medicinska	IST_Pula_Med	OTHER	1997-10-29	2017-04-06	19.436	18-20	ŽABORIČ	ŠIBENIK-KNIN	1	unavailable	unavailable	unavailable	174.3
Istra	PULA, Medicinska	IST_Pula_Med	OTHER	1998-11-19	2017-04-06	18.3792	18-20	KARLOVAC	KARLOVAC	3	YES	YES	BOTH PARENTS	157.5	83.4	158.4	52.9524	100.571
Istra	PULA, Medicinska	IST_Pula_Med	OTHER	1998-11-09	2017-04-06	18.4066	18-20	KARLOVAC	KARLOVAC	3	YES	NO	ONE PARENT	162	83.6	159.6	51.6049	98.5185
Istra	PULA, Medicinska	IST_Pula_Med	OTHER	1998-10-17	2017-04-06	18.4695	18-20	KARLOVAC	KARLOVAC	3	YES	YES	BOTH PARENTS	170.3
Istra	PULA, Medicinska	IST_Pula_Med	OTHER	1999-02-01	2017-04-06	18.1766	18-20	PULA	ISTRA	3	YES	NO	ONE PARENT	165.5
Istra	PULA, Medicinska	IST_Pula_Med	OTHER	1999-01-27	2017-04-06	18.1903	18-20	PULA	ISTRA	3	YES	YES	BOTH PARENTS	177.5
Istra	PULA, Medicinska	IST_Pula_Med	OTHER	1997-08-31	2017-04-06	19.5975	18-20	ŠIBENIK	ŠIBENIK-KNIN	3	YES	NO	ONE PARENT	170.3
Istra	PULA, Medicinska	IST_Pula_Med	OTHER	1997-07-18	2017-04-06	19.718	18-20	ZLARIN	ŠIBENIK-KNIN	1	YES	NO	ONE PARENT	172
Istra	PULA, Primijenjih umjetnosti i dizajna	IST_Pula_Prim	OTHER	1998-10-29	2017-04-05	18.4339	18-20	GORNJI SJENIČAK	KARLOVAC	1	NO	NO	NEITHER	172.8
Istra	PULA, Primijenjih umjetnosti i dizajna	IST_Pula_Prim	OTHER	2000-03-12	2017-04-05	17.065	17	METKOVIĆ	DUBROVNIK-NERETVA	2	NO	YES	ONE PARENT	174.9
Istra	PULA, Primijenjih umjetnosti i dizajna	IST_Pula_Prim	OTHER	2000-01-06	2017-04-05	17.2457	17	METKOVIĆ	DUBROVNIK-NERETVA	2	NO	YES	ONE PARENT	165
Istra	PULA, Primijenjih umjetnosti i dizajna	IST_Pula_Prim	OTHER	1999-12-22	2017-04-05	17.2868	17	METKOVIĆ	DUBROVNIK-NERETVA	2	NO	NO	NEITHER	169
Istra	PULA, Primijenjih umjetnosti i dizajna	IST_Pula_Prim	OTHER	1999-09-04	2017-04-05	17.5852	17	METKOVIĆ	DUBROVNIK-NERETVA	2	NO	NO	NEITHER	170
Istra	PULA, Primijenjih umjetnosti i dizajna	IST_Pula_Prim	OTHER	1999-07-16	2017-04-05	17.7221	17	METKOVIĆ	DUBROVNIK-NERETVA	2	NO	NO	NEITHER	163.2
Istra	PULA, Primijenjih umjetnosti i dizajna	IST_Pula_Prim	OTHER	1999-06-21	2017-04-05	17.7906	17	NEUM	DUBROVNIK-NERETVA	1	NO	NO	NEITHER	166.8
Istra	PULA, Primijenjih umjetnosti i dizajna	IST_Pula_Prim	OTHER	1999-03-10	2017-04-05	18.0726	18-20	POMER	ISTRA	1	NO	NO	NEITHER	164.4
Istra	PULA, Primijenjih umjetnosti i dizajna	IST_Pula_Prim	OTHER	1999-01-17	2017-04-05	18.2149	18-20	PULA	ISTRA	3	NO	NO	NEITHER	166	90.6	163.9	54.5783	98.7349
Istra	PULA, Primijenjih umjetnosti i dizajna	IST_Pula_Prim	OTHER	1998-12-05	2017-04-05	18.3326	18-20	PULA	ISTRA	3	NO	NO	NEITHER	152.9	85.6	153.2	55.9843	100.196
Istra	PULA, Primijenjih umjetnosti i dizajna	IST_Pula_Prim	OTHER	1998-09-05	2017-04-05	18.5818	18-20	ŠĆULAC	KARLOVAC	1	NO	NO	NEITHER	169
Istra	PULA, Primijenjih umjetnosti i dizajna	IST_Pula_Prim	OTHER	1998-04-12	2017-04-05	18.9815	18-20	SINJ	SPLIT-DALMACIJA	2	unavailable	unavailable	unavailable	169.7
Istra	PULA, Primijenjih umjetnosti i dizajna	IST_Pula_Prim	OTHER	1998-02-21	2017-04-05	19.1184	18-20	SRIMA	ŠIBENIK-KNIN	1	unavailable	unavailable	unavailable	166
Istra	PULA, Primijenjih umjetnosti i dizajna	IST_Pula_Prim	OTHER	1998-02-17	2017-04-05	19.1294	18-20	ŠIBENIK	ŠIBENIK-KNIN	3	unavailable	unavailable	unavailable	171
Istra	PULA, Primijenjih umjetnosti i dizajna	IST_Pula_Prim	OTHER	1998-11-19	2017-04-05	18.3765	18-20	KARLOVAC	KARLOVAC	3	YES	NO	ONE PARENT	167.4	92.5	166.5	55.2569	99.4624
Istra	PULA, Primijenjih umjetnosti i dizajna	IST_Pula_Prim	OTHER	2000-03-11	2017-04-05	17.0678	17	METKOVIĆ	DUBROVNIK-NERETVA	2	YES	NO	ONE PARENT	183.8
Istra	PULA, Primijenjih umjetnosti i dizajna	IST_Pula_Prim	OTHER	2000-02-23	2017-04-05	17.1143	17	METKOVIĆ	DUBROVNIK-NERETVA	2	YES	NO	ONE PARENT	165.9
Istra	PULA, Primijenjih umjetnosti i dizajna	IST_Pula_Prim	OTHER	1999-09-20	2017-04-05	17.5414	17	METKOVIĆ	DUBROVNIK-NERETVA	2	YES	NO	ONE PARENT	165
Istra	PULA, Primijenjih umjetnosti i dizajna	IST_Pula_Prim	OTHER	1999-07-11	2017-04-05	17.7358	17	METKOVIĆ	DUBROVNIK-NERETVA	2	YES	NO	ONE PARENT	156.5
Istra	PULA, Primijenjih umjetnosti i dizajna	IST_Pula_Prim	OTHER	1999-06-27	2017-04-05	17.7741	17	METKOVIĆ	DUBROVNIK-NERETVA	2	YES	YES	BOTH PARENTS	173.7
Istra	PULA, Primijenjih umjetnosti i dizajna	IST_Pula_Prim	OTHER	1998-06-12	2017-04-05	18.8145	18-20	PODGORA	SPLIT-DALMACIJA	1	YES	NO	ONE PARENT	168.2
Istra	PULA, Strukovna	IST_Pula_Struk	OTHER	1998-08-10	2017-04-06	18.6557	18-20	DONJI KOSINJ	LIKA-SENJ	1	NO	NO	NEITHER	166.8
Istra	PULA, Strukovna	IST_Pula_Struk	OTHER	1998-06-26	2017-04-06	18.7789	18-20	DONJI PROLOŽAC	SPLIT-DALMACIJA	1	NO	NO	NEITHER	163.5
Istra	PULA, Strukovna	IST_Pula_Struk	OTHER	1998-11-01	2017-04-06	18.4285	18-20	DUGA RESA	KARLOVAC	2	NO	NO	NEITHER	169.9
Istra	PULA, Strukovna	IST_Pula_Struk	OTHER	1998-08-08	2017-04-06	18.6612	18-20	GOSPIĆ	LIKA-SENJ	2	NO	NO	NEITHER	173.8
Istra	PULA, Strukovna	IST_Pula_Struk	OTHER	1997-04-29	2017-04-06	19.937	18-20	GRAČAC	ZADAR	1	NO	NO	NEITHER	172.4
Istra	PULA, Strukovna	IST_Pula_Struk	OTHER	1998-11-30	2017-04-06	18.3491	18-20	KAMANJE	KARLOVAC	1	NO	NO	NEITHER	157.3	83	158	52.7654	100.445
Istra	PULA, Strukovna	IST_Pula_Struk	OTHER	1998-11-07	2017-04-06	18.412	18-20	KARLOVAC	KARLOVAC	3	NO	YES	ONE PARENT	168	93.1	167.9	55.4167	99.9405
Istra	PULA, Strukovna	IST_Pula_Struk	OTHER	1998-10-18	2017-04-06	18.4668	18-20	KARLOVAC	KARLOVAC	3	NO	YES	ONE PARENT	173.5
Istra	PULA, Strukovna	IST_Pula_Struk	OTHER	1999-03-23	2017-04-06	18.0397	18-20	PULA	ISTRA	3	NO	YES	ONE PARENT	165.7	91.1	162.6	54.9789	98.1291
Istra	PULA, Strukovna	IST_Pula_Struk	OTHER	1999-03-19	2017-04-06	18.0507	18-20	PULA	ISTRA	3	NO	NO	NEITHER	170.5	89.8	171.5	52.6686	100.587
Istra	PULA, Strukovna	IST_Pula_Struk	OTHER	1999-03-08	2017-04-06	18.0808	18-20	PULA	ISTRA	3	NO	YES	ONE PARENT	166.8
Istra	PULA, Strukovna	IST_Pula_Struk	OTHER	1999-01-22	2017-04-06	18.204	18-20	PULA	ISTRA	3	NO	NO	NEITHER	163.1	87.6	169.5	53.7094	103.924
Istra	PULA, Strukovna	IST_Pula_Struk	OTHER	1999-01-12	2017-04-06	18.2313	18-20	PULA	ISTRA	3	NO	NO	NEITHER	164	78.5	167.5	47.8659	102.134
Istra	PULA, Strukovna	IST_Pula_Struk	OTHER	1998-12-16	2017-04-06	18.3053	18-20	PULA	ISTRA	3	NO	NO	NEITHER	160.9
Istra	PULA, Strukovna	IST_Pula_Struk	OTHER	1998-06-10	2017-04-06	18.8227	18-20	TUČEPI	SPLIT-DALMACIJA	1	NO	NO	NEITHER	166
Istra	PULA, Strukovna	IST_Pula_Struk	OTHER	1998-03-02	2017-04-06	19.0965	18-20	KNIN	ŠIBENIK-KNIN	2	unavailable	unavailable	unavailable	162
Istra	PULA, Strukovna	IST_Pula_Struk	OTHER	1998-04-16	2017-04-06	18.9733	18-20	PASTIRA	SPLIT-DALMACIJA	1	unavailable	unavailable	unavailable	162.4
Istra	PULA, Strukovna	IST_Pula_Struk	OTHER	1998-05-20	2017-04-06	18.8802	18-20	SINJ	SPLIT-DALMACIJA	2	unavailable	unavailable	unavailable	160.8
Istra	PULA, Strukovna	IST_Pula_Struk	OTHER	1998-04-03	2017-04-06	19.0089	18-20	SPLIT	SPLIT-DALMACIJA	3	unavailable	unavailable	unavailable	166.8
Istra	PULA, Strukovna	IST_Pula_Struk	OTHER	1998-04-02	2017-04-06	19.0116	18-20	SPLIT	SPLIT-DALMACIJA	3	unavailable	unavailable	unavailable	170
Istra	PULA, Strukovna	IST_Pula_Struk	OTHER	1998-02-18	2017-04-06	19.1294	18-20	ŠIBENIK	ŠIBENIK-KNIN	3	unavailable	unavailable	unavailable	172.7
Istra	PULA, Strukovna	IST_Pula_Struk	OTHER	1997-11-13	2017-04-06	19.3949	18-20	ŠIBENIK	ŠIBENIK-KNIN	3	unavailable	unavailable	unavailable	169
Istra	PULA, Strukovna	IST_Pula_Struk	OTHER	1998-08-10	2017-04-06	18.6557	18-20	GOSPIĆ	LIKA-SENJ	2	YES	NO	ONE PARENT	164.3
Istra	PULA, Strukovna	IST_Pula_Struk	OTHER	1999-03-13	2017-04-06	18.0671	18-20	MARČANA	ISTRA	1	YES	YES	BOTH PARENTS	177.6
Istra	PULA, Tehnička	IST_Pula_Teh	OTHER	1998-07-07	2017-04-06	18.7488	18-20	IMOTSKI	SPLIT-DALMACIJA	2	NO	NO	NEITHER	167.6
Istra	PULA, Tehnička	IST_Pula_Teh	OTHER	1998-10-13	2017-04-06	18.4805	18-20	KARLOVAC	KARLOVAC	3	NO	YES	ONE PARENT	160.1
Istra	PULA, Tehnička	PUL_Pula_Teh	OTHER	1999-01-29	2017-04-06	18.1848	18-20	PULA	ISTRA	3	NO	NO	NEITHER	170.3
Istra	PULA, Tehnička	IST_Pula_Teh	OTHER	1998-05-14	2017-04-06	18.8966	18-20	TRILJ	SPLIT-DALMACIJA	1	unavailable	unavailable	unavailable	168.6
Istra	PULA, Tehnička	PUL_Pula_Teh	OTHER	1999-03-05	2017-04-06	18.089	18-20	PULA	ISTRA	3	YES	NO	ONE PARENT	174.3
Karlovac	KARLOVAC, Ekonomsko-turistička	KAR_Kar_Ekon	OTHER	1998-09-18	2017-04-07	18.5517	18-20	DRAGANIĆ	KARLOVAC	1	NO	NO	NEITHER	165
Karlovac	KARLOVAC, Ekonomsko-turistička	KAR_Kar_Ekon	OTHER	1998-11-01	2017-04-07	18.4312	18-20	GORNJE MRZLO POLJE	KARLOVAC	1	NO	YES	ONE PARENT	165
Karlovac	KARLOVAC, Ekonomsko-turistička	KAR_Kar_Ekon	OTHER	1998-08-04	2017-04-07	18.6749	18-20	GRAČAC	ZADAR	1	NO	NO	NEITHER	161.6
Karlovac	KARLOVAC, Ekonomsko-turistička	KAR_Kar_Ekon	OTHER	1998-07-12	2017-04-07	18.7379	18-20	GRUBINE	SPLIT-DALMACIJA	1	NO	NO	NEITHER	171.4
Karlovac	KARLOVAC, Ekonomsko-turistička	KAR_Kar_Ekon	OTHER	1998-10-01	2017-04-07	18.5161	18-20	JOSIPDOL	KARLOVAC	1	NO	NO	NEITHER	173
Karlovac	KARLOVAC, Ekonomsko-turistička	KAR_Kar_Ekon	OTHER	1998-12-02	2017-04-07	18.3463	18-20	JUROVSKI BROD	KARLOVAC	1	NO	NO	NEITHER	161.5	87	160.4	53.87	99.3189
Karlovac	KARLOVAC, Ekonomsko-turistička	KAR_Kar_Ekon	OTHER	1998-11-16	2017-04-07	18.3901	18-20	KARLOVAC	KARLOVAC	3	NO	YES	ONE PARENT	162.7	86.9	160	53.4112	98.3405
Karlovac	KARLOVAC, Ekonomsko-turistička	KAR_Kar_Ekon	OTHER	1998-11-13	2017-04-07	18.3984	18-20	KARLOVAC	KARLOVAC	3	NO	NO	NEITHER	165.7	87.3	165.6	52.6856	99.9396
Karlovac	KARLOVAC, Ekonomsko-turistička	KAR_Kar_Ekon	OTHER	1998-11-09	2017-04-07	18.4093	18-20	KARLOVAC	KARLOVAC	3	NO	NO	NEITHER	165	86.4	155.7	52.3636	94.3636
Karlovac	KARLOVAC, Ekonomsko-turistička	KAR_Kar_Ekon	OTHER	1998-11-08	2017-04-07	18.412	18-20	KARLOVAC	KARLOVAC	3	NO	NO	NEITHER	172.9	90.3	173.5	52.2267	100.347
Karlovac	KARLOVAC, Ekonomsko-turistička	KAR_Kar_Ekon	OTHER	1998-10-28	2017-04-07	18.4422	18-20	KARLOVAC	KARLOVAC	3	NO	NO	NEITHER	161.6
Karlovac	KARLOVAC, Ekonomsko-turistička	KAR_Kar_Ekon	OTHER	1998-10-26	2017-04-07	18.4476	18-20	KARLOVAC	KARLOVAC	3	NO	NO	NEITHER	164.4
Karlovac	KARLOVAC, Ekonomsko-turistička	KAR_Kar_Ekon	OTHER	1998-09-30	2017-04-07	18.5188	18-20	KARLOVAC	KARLOVAC	3	NO	NO	NEITHER	171.8
Karlovac	KARLOVAC, Ekonomsko-turistička	KAR_Kar_Ekon	OTHER	1998-09-28	2017-04-07	18.5243	18-20	KARLOVAC	KARLOVAC	3	NO	NO	NEITHER	170.3
Karlovac	KARLOVAC, Ekonomsko-turistička	KAR_Kar_Ekon	OTHER	1998-09-28	2017-04-07	18.5243	18-20	KARLOVAC	KARLOVAC	3	NO	NO	NEITHER	167.8
Karlovac	KARLOVAC, Ekonomsko-turistička	KAR_Kar_Ekon	OTHER	1998-08-01	2017-04-07	18.6831	18-20	KORENICA	LIKA-SENJ	1	NO	NO	NEITHER	171
Karlovac	KARLOVAC, Ekonomsko-turistička	KAR_Kar_Ekon	OTHER	1998-12-22	2017-04-07	18.2916	18-20	LABIN	ISTRA	2	NO	NO	NEITHER	170.5
Karlovac	KARLOVAC, Ekonomsko-turistička	KAR_Kar_Ekon	OTHER	1999-03-15	2017-04-07	18.0643	18-20	LIŽNJAN	ISTRA	1	NO	NO	NEITHER	170.3
Karlovac	KARLOVAC, Ekonomsko-turistička	KAR_Kar_Ekon	OTHER	1998-06-16	2017-04-07	18.809	18-20	MAKARSKA	SPLIT-DALMACIJA	2	NO	NO	NEITHER	164
Karlovac	KARLOVAC, Ekonomsko-turistička	KAR_Kar_Ekon	OTHER	1999-03-13	2017-04-07	18.0698	18-20	MARČANA	ISTRA	1	NO	NO	NEITHER	164.5
Karlovac	KARLOVAC, Ekonomsko-turistička	KAR_Kar_Ekon	OTHER	1999-09-20	2017-04-07	17.5469	17	METKOVIĆ	DUBROVNIK-NERETVA	2	NO	NO	NEITHER	176.3
Karlovac	KARLOVAC, Ekonomsko-turistička	KAR_Kar_Ekon	OTHER	1998-07-24	2017-04-07	18.705	18-20	OTOČAC	LIKA-SENJ	1	NO	NO	NEITHER	152.3
Karlovac	KARLOVAC, Ekonomsko-turistička	KAR_Kar_Ekon	OTHER	1997-09-30	2017-04-07	19.5181	18-20	PIRAMATOVCI	ŠIBENIK-KNIN	1	NO	NO	NEITHER	179.2
Karlovac	KARLOVAC, Ekonomsko-turistička	KAR_Kar_Ekon	OTHER	1999-04-14	2017-04-07	17.9822	17	PULA	ISTRA	3	NO	NO	NEITHER	163.5	88	155.5	53.8226	95.107
Karlovac	KARLOVAC, Ekonomsko-turistička	KAR_Kar_Ekon	OTHER	1999-03-24	2017-04-07	18.0397	18-20	PULA	ISTRA	3	NO	NO	NEITHER	166.5	89.4	170.3	53.6937	102.282
Karlovac	KARLOVAC, Ekonomsko-turistička	KAR_Kar_Ekon	OTHER	1999-03-23	2017-04-07	18.0424	18-20	PULA	ISTRA	3	NO	NO	NEITHER	169	89.1	168	52.7219	99.4083
Karlovac	KARLOVAC, Ekonomsko-turistička	KAR_Kar_Ekon	OTHER	1999-03-20	2017-04-07	18.0507	18-20	PULA	ISTRA	3	NO	NO	NEITHER	159.5	85.6	163.2	53.6677	102.32
Karlovac	KARLOVAC, Ekonomsko-turistička	KAR_Kar_Ekon	OTHER	1999-03-11	2017-04-07	18.0753	18-20	PULA	ISTRA	3	NO	NO	NEITHER	160.9
Karlovac	KARLOVAC, Ekonomsko-turistička	KAR_Kar_Ekon	OTHER	1999-02-28	2017-04-07	18.1054	18-20	PULA	ISTRA	3	NO	NO	NEITHER	173.2
Karlovac	KARLOVAC, Ekonomsko-turistička	KAR_Kar_Ekon	OTHER	1999-02-25	2017-04-07	18.1136	18-20	PULA	ISTRA	3	NO	NO	NEITHER	164.3
Karlovac	KARLOVAC, Ekonomsko-turistička	KAR_Kar_Ekon	OTHER	1999-02-24	2017-04-07	18.1164	18-20	PULA	ISTRA	3	NO	NO	NEITHER	181.3
Karlovac	KARLOVAC, Ekonomsko-turistička	KAR_Kar_Ekon	OTHER	1999-02-20	2017-04-07	18.1273	18-20	PULA	ISTRA	3	NO	YES	ONE PARENT	171.1
Karlovac	KARLOVAC, Ekonomsko-turistička	KAR_Kar_Ekon	OTHER	1999-02-19	2017-04-07	18.13	18-20	PULA	ISTRA	3	NO	YES	ONE PARENT	163.2
Karlovac	KARLOVAC, Ekonomsko-turistička	KAR_Kar_Ekon	OTHER	1999-02-05	2017-04-07	18.1684	18-20	PULA	ISTRA	3	NO	YES	ONE PARENT	170
Karlovac	KARLOVAC, Ekonomsko-turistička	KAR_Kar_Ekon	OTHER	1999-01-01	2017-04-07	18.2642	18-20	PULA	ISTRA	3	NO	NO	NEITHER	169
Karlovac	KARLOVAC, Ekonomsko-turistička	KAR_Kar_Ekon	OTHER	1998-07-18	2017-04-07	18.7214	18-20	SINAC	LIKA-SENJ	1	NO	NO	NEITHER	177.1
Karlovac	KARLOVAC, Ekonomsko-turistička	KAR_Kar_Ekon	OTHER	1998-06-12	2017-04-07	18.82	18-20	TUČEPI	SPLIT-DALMACIJA	1	NO	YES	ONE PARENT	173.3
Karlovac	KARLOVAC, Ekonomsko-turistička	KAR_Kar_Ekon	OTHER	1998-11-05	2017-04-07	18.4203	18-20	VIVODINA	KARLOVAC	1	NO	NO	NEITHER	168	91.3	172.1	54.3452	102.44
Karlovac	KARLOVAC, Ekonomsko-turistička	KAR_Kar_Ekon	OTHER	1998-07-15	2017-04-07	18.7296	18-20	VRHOVINE	LIKA-SENJ	1	NO	NO	NEITHER	175
Karlovac	KARLOVAC, Ekonomsko-turistička	KAR_Kar_Ekon	OTHER	1998-06-25	2017-04-07	18.7844	18-20	ZAGVOZD	SPLIT-DALMACIJA	1	NO	NO	NEITHER	165.3
Karlovac	KARLOVAC, Ekonomsko-turistička	KAR_Kar_Ekon	OTHER	1998-06-08	2017-04-07	18.8309	18-20	GALA	SPLIT-DALMACIJA	1	unavailable	unavailable	unavailable	186
Karlovac	KARLOVAC, Ekonomsko-turistička	KAR_Kar_Ekon	OTHER	1998-06-04	2017-04-07	18.8419	18-20	GRAB	SPLIT-DALMACIJA	1	unavailable	unavailable	unavailable	168
Karlovac	KARLOVAC, Ekonomsko-turistička	KAR_Kar_Ekon	OTHER	1998-04-21	2017-04-07	18.9624	18-20	LJUBITOVICA	SPLIT-DALMACIJA	1	unavailable	unavailable	unavailable	173.2
Karlovac	KARLOVAC, Ekonomsko-turistička	KAR_Kar_Ekon	OTHER	1998-03-01	2017-04-07	19.102	18-20	OKLAJ	ŠIBENIK-KNIN	1	unavailable	unavailable	unavailable	168.2
Karlovac	KARLOVAC, Ekonomsko-turistička	KAR_Kar_Ekon	OTHER	1998-05-28	2017-04-07	18.8611	18-20	OTOK	SPLIT-DALMACIJA	1	unavailable	unavailable	unavailable	165
Karlovac	KARLOVAC, Ekonomsko-turistička	KAR_Kar_Ekon	OTHER	1998-04-07	2017-04-07	19.0007	18-20	SPLIT	SPLIT-DALMACIJA	3	unavailable	unavailable	unavailable	166.5
Karlovac	KARLOVAC, Ekonomsko-turistička	KAR_Kar_Ekon	OTHER	1998-04-02	2017-04-07	19.0144	18-20	SPLIT	SPLIT-DALMACIJA	3	unavailable	unavailable	unavailable	169.8
Karlovac	KARLOVAC, Ekonomsko-turistička	KAR_Kar_Ekon	OTHER	1998-04-01	2017-04-07	19.0171	18-20	SPLIT	SPLIT-DALMACIJA	3	unavailable	unavailable	unavailable	170.9
Karlovac	KARLOVAC, Ekonomsko-turistička	KAR_Kar_Ekon	OTHER	1998-03-29	2017-04-07	19.0253	18-20	SPLIT	SPLIT-DALMACIJA	3	unavailable	unavailable	unavailable	180.7
Karlovac	KARLOVAC, Ekonomsko-turistička	KAR_Kar_Ekon	OTHER	1998-02-02	2017-04-07	19.1759	18-20	ŠIBENIK	ŠIBENIK-KNIN	3	unavailable	unavailable	unavailable	172.7
Karlovac	KARLOVAC, Ekonomsko-turistička	KAR_Kar_Ekon	OTHER	1998-03-27	2017-04-07	19.0308	18-20	UGLJANE	SPLIT-DALMACIJA	1	unavailable	unavailable	unavailable	176
Karlovac	KARLOVAC, Ekonomsko-turistička	KAR_Kar_Ekon	OTHER	1998-05-08	2017-04-07	18.9158	18-20	VEDRINE	SPLIT-DALMACIJA	1	unavailable	unavailable	unavailable	162.2
Karlovac	KARLOVAC, Ekonomsko-turistička	KAR_Kar_Ekon	OTHER	1998-03-27	2017-04-07	19.0308	18-20	VELA LUKA	DUBROVNIK-NERETVA	1	unavailable	unavailable	unavailable	163.7
Karlovac	KARLOVAC, Ekonomsko-turistička	KAR_Kar_Ekon	OTHER	1997-11-02	2017-04-07	19.4278	18-20	VODICE	ŠIBENIK-KNIN	1	unavailable	unavailable	unavailable	171.5
Karlovac	KARLOVAC, Ekonomsko-turistička	KAR_Kar_Ekon	OTHER	1998-05-08	2017-04-07	18.9158	18-20	VOJNIĆ	KARLOVAC	1	unavailable	unavailable	unavailable	169.2
Karlovac	KARLOVAC, Ekonomsko-turistička	KAR_Kar_Ekon	OTHER	1998-11-27	2017-04-07	18.36	18-20	KARLOVAC	KARLOVAC	3	YES	NO	ONE PARENT	162.7	85.5	160.2	52.5507	98.4634
Karlovac	KARLOVAC, Ekonomsko-turistička	KAR_Kar_Ekon	OTHER	1998-10-18	2017-04-07	18.4695	18-20	KARLOVAC	KARLOVAC	3	YES	YES	BOTH PARENTS	177.7
Karlovac	KARLOVAC, Ekonomsko-turistička	KAR_Kar_Ekon	OTHER	1998-06-17	2017-04-07	18.8063	18-20	MAKARSKA	SPLIT-DALMACIJA	2	YES	NO	ONE PARENT	173.5
Karlovac	KARLOVAC, Ekonomsko-turistička	KAR_Kar_Ekon	OTHER	1998-07-03	2017-04-07	18.7625	18-20	MEDVIDOVIĆA DRAGA	SPLIT-DALMACIJA	1	YES	NO	ONE PARENT	165.9
Karlovac	KARLOVAC, Ekonomsko-turistička	KAR_Kar_Ekon	OTHER	1998-08-23	2017-04-07	18.6229	18-20	OGULIN	KARLOVAC	2	YES	NO	ONE PARENT	169.1
Karlovac	KARLOVAC, Ekonomsko-turistička	KAR_Kar_Ekon	OTHER	1999-02-14	2017-04-07	18.1437	18-20	PULA	ISTRA	3	YES	YES	BOTH PARENTS	157
Karlovac	KARLOVAC, Ekonomsko-turistička	KAR_Kar_Ekon	OTHER	1999-02-08	2017-04-07	18.1602	18-20	PULA	ISTRA	3	YES	NO	ONE PARENT	162.8
Karlovac	KARLOVAC, Ekonomsko-turistička	KAR_Kar_Ekon	OTHER	1998-10-08	2017-04-07	18.4969	18-20	SEVERIN NA KUPI	PRIMORJE-GORSKI KOTAR	1	YES	NO	ONE PARENT	168.2
Karlovac	KARLOVAC, Gimnazija	KAR_Kar_Gim	GIMNAZIJA	1998-04-24	2017-04-03	18.9432	18-20	???	SPLIT-DALMACIJA	1	NO	NO	NEITHER	171.6
Karlovac	KARLOVAC, Gimnazija	KAR_Kar_Gim	GIMNAZIJA	1998-07-23	2017-04-03	18.6968	18-20	BRINJE	LIKA-SENJ	1	NO	NO	NEITHER	169.9
Karlovac	KARLOVAC, Gimnazija	KAR_Kar_Gim	GIMNAZIJA	1998-07-10	2017-04-03	18.7324	18-20	DONJI PROLOŽAC	SPLIT-DALMACIJA	1	NO	NO	NEITHER	165.9
Karlovac	KARLOVAC, Gimnazija	KAR_Kar_Gim	GIMNAZIJA	1998-10-30	2017-04-03	18.4257	18-20	DUGA RESA	KARLOVAC	2	NO	NO	NEITHER	162.5
Karlovac	KARLOVAC, Gimnazija	KAR_Kar_Gim	GIMNAZIJA	1998-08-27	2017-04-03	18.601	18-20	DUGA RESA	KARLOVAC	2	NO	YES	ONE PARENT	181.3	96.3	181	53.1164	99.8345
Karlovac	KARLOVAC, Gimnazija	KAR_Kar_Gim	GIMNAZIJA	1998-08-21	2017-04-03	18.6174	18-20	GOMINJE	KARLOVAC	1	NO	NO	NEITHER	170.6
Karlovac	KARLOVAC, Gimnazija	KAR_Kar_Gim	GIMNAZIJA	1998-10-27	2017-04-03	18.4339	18-20	JARČE POLJE	KARLOVAC	1	NO	NO	NEITHER	169.2
Karlovac	KARLOVAC, Gimnazija	KAR_Kar_Gim	GIMNAZIJA	1998-07-31	2017-04-03	18.6749	18-20	JEZERCE	LIKA-SENJ	1	NO	NO	NEITHER	168.3
Karlovac	KARLOVAC, Gimnazija	KAR_Kar_Gim	GIMNAZIJA	1998-08-20	2017-04-03	18.6201	18-20	JOSIPDOL	KARLOVAC	1	NO	NO	NEITHER	155.4
Karlovac	KARLOVAC, Gimnazija	KAR_Kar_Gim	GIMNAZIJA	1998-06-30	2017-04-03	18.7598	18-20	KAMENMOST	SPLIT-DALMACIJA	1	NO	NO	NEITHER	175.3
Karlovac	KARLOVAC, Gimnazija	KAR_Kar_Gim	GIMNAZIJA	1998-11-26	2017-04-03	18.3518	18-20	KARLOVAC	KARLOVAC	3	NO	NO	NEITHER	158.5	83.6	162.6	52.7445	102.587
Karlovac	KARLOVAC, Gimnazija	KAR_Kar_Gim	GIMNAZIJA	1998-11-21	2017-04-03	18.3655	18-20	KARLOVAC	KARLOVAC	3	NO	NO	NEITHER	173.5	91.2	175	52.5648	100.865
Karlovac	KARLOVAC, Gimnazija	KAR_Kar_Gim	GIMNAZIJA	1998-11-10	2017-04-03	18.3956	18-20	KARLOVAC	KARLOVAC	3	NO	NO	NEITHER	158.1	84	163.7	53.1309	103.542
Karlovac	KARLOVAC, Gimnazija	KAR_Kar_Gim	GIMNAZIJA	1998-10-17	2017-04-03	18.4613	18-20	KARLOVAC	KARLOVAC	3	NO	NO	NEITHER	172
Karlovac	KARLOVAC, Gimnazija	KAR_Kar_Gim	GIMNAZIJA	1998-07-21	2017-04-03	18.7023	18-20	KRASNO	LIKA-SENJ	1	NO	NO	NEITHER	164
Karlovac	KARLOVAC, Gimnazija	KAR_Kar_Gim	GIMNAZIJA	1998-12-20	2017-04-03	18.2861	18-20	LABIN	ISTRA	2	NO	NO	NEITHER	160.8
Karlovac	KARLOVAC, Gimnazija	KAR_Kar_Gim	GIMNAZIJA	1999-09-13	2017-04-03	17.5551	17	METKOVIĆ	DUBROVNIK-NERETVA	2	NO	NO	NEITHER	184.4
Karlovac	KARLOVAC, Gimnazija	KAR_Kar_Gim	GIMNAZIJA	1998-08-12	2017-04-03	18.642	18-20	OGULIN	KARLOVAC	2	NO	NO	NEITHER	178.5
Karlovac	KARLOVAC, Gimnazija	KAR_Kar_Gim	GIMNAZIJA	1998-07-25	2017-04-03	18.6913	18-20	OTOČAC	LIKA-SENJ	1	NO	NO	NEITHER	172.6
Karlovac	KARLOVAC, Gimnazija	KAR_Kar_Gim	GIMNAZIJA	1999-05-02	2017-04-03	17.922	17	PAMIČI	ISTRA	1	NO	NO	NEITHER	171.4	92.5	171	53.9673	99.7666
Karlovac	KARLOVAC, Gimnazija	KAR_Kar_Gim	GIMNAZIJA	1998-12-15	2017-04-03	18.2998	18-20	PAZIN	ISTRA	1	NO	NO	NEITHER	177.1
Karlovac	KARLOVAC, Gimnazija	KAR_Kar_Gim	GIMNAZIJA	1998-07-15	2017-04-03	18.7187	18-20	PROZOR	LIKA-SENJ	1	NO	NO	NEITHER	168.2
Karlovac	KARLOVAC, Gimnazija	KAR_Kar_Gim	GIMNAZIJA	1999-03-21	2017-04-03	18.037	18-20	PULA	ISTRA	3	NO	NO	NEITHER	170	88.8	167.7	52.2353	98.6471
Karlovac	KARLOVAC, Gimnazija	KAR_Kar_Gim	GIMNAZIJA	1999-03-20	2017-04-03	18.0397	18-20	PULA	ISTRA	3	NO	NO	NEITHER	173.7	92.6	176.8	53.3103	101.785
Karlovac	KARLOVAC, Gimnazija	KAR_Kar_Gim	GIMNAZIJA	1999-02-20	2017-04-03	18.1164	18-20	PULA	ISTRA	3	NO	NO	NEITHER	174.5
Karlovac	KARLOVAC, Gimnazija	KAR_Kar_Gim	GIMNAZIJA	1999-02-01	2017-04-03	18.1684	18-20	PULA	ISTRA	3	NO	NO	NEITHER	164.6
Karlovac	KARLOVAC, Gimnazija	KAR_Kar_Gim	GIMNAZIJA	1999-01-19	2017-04-03	18.204	18-20	PULA	ISTRA	3	NO	YES	ONE PARENT	157.4	83.6	159.6	53.1131	101.398
Karlovac	KARLOVAC, Gimnazija	KAR_Kar_Gim	GIMNAZIJA	1999-01-14	2017-04-03	18.2177	18-20	PULA	ISTRA	3	NO	NO	NEITHER	164.1	88	163	53.6258	99.3297
Karlovac	KARLOVAC, Gimnazija	KAR_Kar_Gim	GIMNAZIJA	1999-01-13	2017-04-03	18.2204	18-20	PULA	ISTRA	3	NO	NO	NEITHER	182.6	99	186.7	54.2169	102.245
Karlovac	KARLOVAC, Gimnazija	KAR_Kar_Gim	GIMNAZIJA	1998-12-24	2017-04-03	18.2752	18-20	PULA	ISTRA	3	NO	NO	NEITHER	158.7
Karlovac	KARLOVAC, Gimnazija	KAR_Kar_Gim	GIMNAZIJA	1998-12-13	2017-04-03	18.3053	18-20	PULA	ISTRA	3	NO	NO	NEITHER	148.2
Karlovac	KARLOVAC, Gimnazija	KAR_Kar_Gim	GIMNAZIJA	1998-06-26	2017-04-03	18.7707	18-20	SPLIT	SPLIT-DALMACIJA	3	NO	NO	NEITHER	174.6
Karlovac	KARLOVAC, Gimnazija	KAR_Kar_Gim	GIMNAZIJA	1999-01-21	2017-04-03	18.1985	18-20	ŠIŠAN	ISTRA	1	NO	NO	NEITHER	163.5
Karlovac	KARLOVAC, Gimnazija	KAR_Kar_Gim	GIMNAZIJA	1998-09-03	2017-04-03	18.5818	18-20	VODOSTAJ	KARLOVAC	1	NO	NO	NEITHER	165.5
Karlovac	KARLOVAC, Gimnazija	KAR_Kar_Gim	GIMNAZIJA	1998-04-30	2017-04-03	18.9268	18-20	ČITLUK	SPLIT-DALMACIJA	1	unavailable	unavailable	unavailable	158.2
Karlovac	KARLOVAC, Gimnazija	KAR_Kar_Gim	GIMNAZIJA	1998-04-21	2017-04-03	18.9514	18-20	KAŠTELA	SPLIT-DALMACIJA	3	unavailable	unavailable	unavailable	164.8
Karlovac	KARLOVAC, Gimnazija	KAR_Kar_Gim	GIMNAZIJA	1998-03-12	2017-04-03	19.0609	18-20	KNIN	ŠIBENIK-KNIN	2	unavailable	unavailable	unavailable	163.1
Karlovac	KARLOVAC, Gimnazija	KAR_Kar_Gim	GIMNAZIJA	1998-05-24	2017-04-03	18.8611	18-20	POTRAVLJE	SPLIT-DALMACIJA	1	unavailable	unavailable	unavailable	177.4
Karlovac	KARLOVAC, Gimnazija	KAR_Kar_Gim	GIMNAZIJA	1998-05-23	2017-04-03	18.8638	18-20	RUDA	SPLIT-DALMACIJA	1	unavailable	unavailable	unavailable	175.3
Karlovac	KARLOVAC, Gimnazija	KAR_Kar_Gim	GIMNAZIJA	1998-04-08	2017-04-03	18.987	18-20	SINJ	SPLIT-DALMACIJA	2	unavailable	unavailable	unavailable	168.1
Karlovac	KARLOVAC, Gimnazija	KAR_Kar_Gim	GIMNAZIJA	1998-03-27	2017-04-03	19.0198	18-20	SPLIT	SPLIT-DALMACIJA	3	unavailable	unavailable	unavailable	170.5
Karlovac	KARLOVAC, Gimnazija	KAR_Kar_Gim	GIMNAZIJA	1998-02-18	2017-04-03	19.1211	18-20	ŠIBENIK	ŠIBENIK-KNIN	3	unavailable	unavailable	unavailable	168.5
Karlovac	KARLOVAC, Gimnazija	KAR_Kar_Gim	GIMNAZIJA	1998-08-07	2017-04-03	18.6557	18-20	GOSPIĆ	LIKA-SENJ	2	YES	NO	ONE PARENT	160
Karlovac	KARLOVAC, Gimnazija	KAR_Kar_Gim	GIMNAZIJA	1998-09-01	2017-04-03	18.5873	18-20	KARLOVAC	KARLOVAC	3	YES	NO	ONE PARENT	161.6	88	160.6	54.4554	99.3812
Karlovac	KARLOVAC, Gimnazija	KAR_Kar_Gim	GIMNAZIJA	1998-06-17	2017-04-03	18.7953	18-20	MAKARSKA	SPLIT-DALMACIJA	2	YES	NO	ONE PARENT	167
Karlovac	KARLOVAC, Gimnazija	KAR_Kar_Gim	GIMNAZIJA	1998-09-22	2017-04-03	18.5298	18-20	OGULIN	KARLOVAC	2	YES	NO	ONE PARENT	157.3
Karlovac	KARLOVAC, Gimnazija	KAR_Kar_Gim	GIMNAZIJA	1999-02-28	2017-04-03	18.0945	18-20	PULA	ISTRA	3	YES	YES	BOTH PARENTS	169.9
Karlovac	KARLOVAC, Gimnazija	KAR_Kar_Gim	GIMNAZIJA	1999-02-21	2017-04-03	18.1136	18-20	PULA	ISTRA	3	YES	YES	BOTH PARENTS	167.4
Karlovac	KARLOVAC, Gimnazija	KAR_Kar_Gim	GIMNAZIJA	1999-02-04	2017-04-03	18.1602	18-20	PULA	ISTRA	3	YES	NO	ONE PARENT	159.3
Karlovac	KARLOVAC, Gimnazija	KAR_Kar_Gim	GIMNAZIJA	1999-01-23	2017-04-03	18.193	18-20	PULA	ISTRA	3	YES	NO	ONE PARENT	164.2
Karlovac	KARLOVAC, Gimnazija	KAR_Kar_Gim	GIMNAZIJA	1999-01-23	2017-04-03	18.193	18-20	PULA	ISTRA	3	YES	YES	BOTH PARENTS	181
Karlovac	KARLOVAC, Gimnazija	KAR_Kar_Gim	GIMNAZIJA	1998-12-23	2017-04-03	18.2779	18-20	PULA	ISTRA	3	YES	YES	BOTH PARENTS	164.8
Karlovac	KARLOVAC, Gimnazija	KAR_Kar_Gim	GIMNAZIJA	1998-07-12	2017-04-03	18.7269	18-20	VRATNIK	LIKA-SENJ	1	YES	NO	ONE PARENT	162.6
Karlovac	KARLOVAC, Gimnazija	KAR_Kar_Gim	GIMNAZIJA	1998-08-08	2017-04-03	18.653	18-20	VRBOVSKO	PRIMORJE-GORSKI KOTAR	1	YES	YES	BOTH PARENTS	178.3
Karlovac	KARLOVAC, Gimnazija	KAR_Kar_Gim	GIMNAZIJA	1998-08-22	2017-04-03	18.6146	18-20	ŽORKOVAC	KARLOVAC	1	YES	NO	ONE PARENT	155	82	159.7	52.9032	103.032
Karlovac	KARLOVAC, Medicinska	KAR_Kar_Med	OTHER	1998-07-09	2017-04-03	18.7351	18-20	DONJI PROLOŽAC	SPLIT-DALMACIJA	1	NO	NO	NEITHER	171.7
Karlovac	KARLOVAC, Medicinska	KAR_Kar_Med	OTHER	1998-09-14	2017-04-03	18.5517	18-20	DRAGANIĆ	KARLOVAC	1	NO	NO	NEITHER	168.1
Karlovac	KARLOVAC, Medicinska	KAR_Kar_Med	OTHER	1998-12-02	2017-04-03	18.3354	18-20	DUGA RESA	KARLOVAC	2	NO	NO	NEITHER	160.9	86	158.9	53.4493	98.757
Karlovac	KARLOVAC, Medicinska	KAR_Kar_Med	OTHER	1998-12-02	2017-04-03	18.3354	18-20	DUGA RESA	KARLOVAC	2	NO	NO	NEITHER	161	88.6	155.5	55.0311	96.5839
Karlovac	KARLOVAC, Medicinska	KAR_Kar_Med	OTHER	1997-03-31	2017-04-03	20.0082	18-20	GRAČAC	ZADAR	1	NO	NO	NEITHER	165.2
Karlovac	KARLOVAC, Medicinska	KAR_Kar_Med	OTHER	1998-07-31	2017-04-03	18.6749	18-20	JEZERCE	LIKA-SENJ	1	NO	NO	NEITHER	174.2
Karlovac	KARLOVAC, Medicinska	KAR_Kar_Med	OTHER	1998-10-27	2017-04-03	18.4339	18-20	KARLOVAC	KARLOVAC	3	NO	NO	NEITHER	159.9
Karlovac	KARLOVAC, Medicinska	KAR_Kar_Med	OTHER	1998-06-16	2017-04-03	18.7981	18-20	MAKARSKA	SPLIT-DALMACIJA	2	NO	NO	NEITHER	171.5
Karlovac	KARLOVAC, Medicinska	KAR_Kar_Med	OTHER	1999-03-09	2017-04-03	18.0698	18-20	MARČANA	ISTRA	1	NO	NO	NEITHER	173.3
Karlovac	KARLOVAC, Medicinska	KAR_Kar_Med	OTHER	1999-01-01	2017-04-03	18.2533	18-20	MEDULIN	ISTRA	1	NO	NO	NEITHER	165.1
Karlovac	KARLOVAC, Medicinska	KAR_Kar_Med	OTHER	1998-11-03	2017-04-03	18.4148	18-20	NOVIGRAD NA DOBRI	KARLOVAC	1	NO	NO	NEITHER	167.7	93.7	163.9	55.8736	97.734
Karlovac	KARLOVAC, Medicinska	KAR_Kar_Med	OTHER	1998-07-16	2017-04-03	18.7159	18-20	OTOČAC	LIKA-SENJ	1	NO	NO	NEITHER	173.5
Karlovac	KARLOVAC, Medicinska	KAR_Kar_Med	OTHER	1998-07-25	2017-04-03	18.6913	18-20	PLITVIČKA JEZERA	LIKA-SENJ	1	NO	YES	ONE PARENT	163.9
Karlovac	KARLOVAC, Medicinska	KAR_Kar_Med	OTHER	1999-02-02	2017-04-03	18.1656	18-20	PULA	ISTRA	3	NO	YES	ONE PARENT	167.4
Karlovac	KARLOVAC, Medicinska	KAR_Kar_Med	OTHER	1999-01-28	2017-04-03	18.1793	18-20	PULA	ISTRA	3	NO	NO	NEITHER	175.1
Karlovac	KARLOVAC, Medicinska	KAR_Kar_Med	OTHER	1999-01-24	2017-04-03	18.1903	18-20	PULA	ISTRA	3	NO	YES	ONE PARENT	176.3
Karlovac	KARLOVAC, Medicinska	KAR_Kar_Med	OTHER	1998-12-08	2017-04-03	18.319	18-20	PULA	ISTRA	3	NO	NO	NEITHER	167.2
Karlovac	KARLOVAC, Medicinska	KAR_Kar_Med	OTHER	1998-07-15	2017-04-03	18.7187	18-20	RAZVALA	LIKA-SENJ	1	NO	NO	NEITHER	167.5
Karlovac	KARLOVAC, Medicinska	KAR_Kar_Med	OTHER	1999-01-20	2017-04-03	18.2012	18-20	VALTURA	ISTRA	1	NO	NO	NEITHER	156
Karlovac	KARLOVAC, Medicinska	KAR_Kar_Med	OTHER	1999-01-20	2017-04-03	18.2012	18-20	VODNJAN	ISTRA	1	NO	NO	NEITHER	160.5
Karlovac	KARLOVAC, Medicinska	KAR_Kar_Med	OTHER	1998-06-24	2017-04-03	18.7762	18-20	ZMIJAVCI	SPLIT-DALMACIJA	1	NO	NO	NEITHER	169.6
Karlovac	KARLOVAC, Medicinska	KAR_Kar_Med	OTHER	1998-05-25	2017-04-03	18.8583	18-20	OTOK	SPLIT-DALMACIJA	1	unavailable	unavailable	unavailable	162.6
Karlovac	KARLOVAC, Medicinska	KAR_Kar_Med	OTHER	1998-05-24	2017-04-03	18.8611	18-20	RUDA	SPLIT-DALMACIJA	1	unavailable	unavailable	unavailable	162
Karlovac	KARLOVAC, Medicinska	KAR_Kar_Med	OTHER	1998-05-20	2017-04-03	18.872	18-20	SINJ	SPLIT-DALMACIJA	2	unavailable	unavailable	unavailable	173.5
Karlovac	KARLOVAC, Medicinska	KAR_Kar_Med	OTHER	1998-02-15	2017-04-03	19.1294	18-20	ŠIBENIK	ŠIBENIK-KNIN	3	unavailable	unavailable	unavailable	164.9
Karlovac	KARLOVAC, Medicinska	KAR_Kar_Med	OTHER	1998-10-30	2017-04-03	18.4257	18-20	DUGA RESA	KARLOVAC	2	YES	YES	BOTH PARENTS	161.5
Karlovac	KARLOVAC, Medicinska	KAR_Kar_Med	OTHER	1998-07-07	2017-04-03	18.7406	18-20	IMOTSKI	SPLIT-DALMACIJA	2	YES	NO	ONE PARENT	167.4
Karlovac	KARLOVAC, Medicinska	KAR_Kar_Med	OTHER	1998-08-24	2017-04-03	18.6092	18-20	KARLOVAC	KARLOVAC	3	YES	YES	BOTH PARENTS	165	96	166.4	58.1818	100.848
Karlovac	KARLOVAC, Medicinska	KAR_Kar_Med	OTHER	1998-07-26	2017-04-03	18.6886	18-20	KORENICA	LIKA-SENJ	1	YES	YES	BOTH PARENTS	172
Karlovac	KARLOVAC, Medicinska	KAR_Kar_Med	OTHER	1999-03-26	2017-04-03	18.0233	18-20	PULA	ISTRA	3	YES	YES	BOTH PARENTS	172.3	90.2	172.6	52.3506	100.174
Karlovac	KARLOVAC, Medicinska	KAR_Kar_Med	OTHER	1999-03-08	2017-04-03	18.0726	18-20	PULA	ISTRA	3	YES	YES	BOTH PARENTS	163.3
Karlovac	KARLOVAC, Medicinska	KAR_Kar_Med	OTHER	1999-02-28	2017-04-03	18.0945	18-20	PULA	ISTRA	3	YES	YES	BOTH PARENTS	164.1
Karlovac	KARLOVAC, Medicinska	KAR_Kar_Med	OTHER	1999-02-02	2017-04-03	18.1656	18-20	PULA	ISTRA	3	YES	YES	BOTH PARENTS	166.6
Karlovac	KARLOVAC, Medicinska	KAR_Kar_Med	OTHER	1999-01-28	2017-04-03	18.1793	18-20	PULA	ISTRA	3	YES	YES	BOTH PARENTS	161.8
Karlovac	KARLOVAC, Medicinska	KAR_Kar_Med	OTHER	1999-01-25	2017-04-03	18.1875	18-20	PULA	ISTRA	3	YES	YES	BOTH PARENTS	165.8
Karlovac	KARLOVAC, Medicinska	KAR_Kar_Med	OTHER	1998-12-29	2017-04-03	18.2615	18-20	PULA	ISTRA	3	YES	YES	BOTH PARENTS	166.7
Karlovac	KARLOVAC, Medicinska	KAR_Kar_Med	OTHER	1998-06-27	2017-04-03	18.768	18-20	RUNOVIĆI	SPLIT-DALMACIJA	1	YES	YES	BOTH PARENTS	159.6
Karlovac	KARLOVAC, Prirodoslovna	KAR_Kar_Prir	OTHER	1998-07-13	2017-04-07	18.7351	18-20	DONJI PROLOŽAC	SPLIT-DALMACIJA	1	NO	NO	NEITHER	175.1
Karlovac	KARLOVAC, Prirodoslovna	KAR_Kar_Prir	OTHER	1998-08-11	2017-04-07	18.6557	18-20	GOSPIĆ	LIKA-SENJ	2	NO	NO	NEITHER	173
Karlovac	KARLOVAC, Prirodoslovna	KAR_Kar_Prir	OTHER	1998-08-11	2017-04-07	18.6557	18-20	GOSPIĆ	LIKA-SENJ	2	NO	YES	ONE PARENT	165.2
Karlovac	KARLOVAC, Prirodoslovna	KAR_Kar_Prir	OTHER	1998-11-25	2017-04-07	18.3655	18-20	KARLOVAC	KARLOVAC	3	NO	NO	NEITHER	168.6	90.2	170.1	53.4994	100.89
Karlovac	KARLOVAC, Prirodoslovna	KAR_Kar_Prir	OTHER	1998-10-19	2017-04-07	18.4668	18-20	KARLOVAC	KARLOVAC	3	NO	YES	ONE PARENT	153.4
Karlovac	KARLOVAC, Prirodoslovna	KAR_Kar_Prir	OTHER	1998-09-28	2017-04-07	18.5243	18-20	KARLOVAC	KARLOVAC	3	NO	NO	NEITHER	151.2
Karlovac	KARLOVAC, Prirodoslovna	KAR_Kar_Prir	OTHER	1998-09-11	2017-04-07	18.5708	18-20	KARLOVAC	KARLOVAC	3	NO	NO	NEITHER	172.9
Karlovac	KARLOVAC, Prirodoslovna	KAR_Kar_Prir	OTHER	1999-03-31	2017-04-07	18.0205	18-20	PULA	ISTRA	3	NO	NO	NEITHER	160.8	85.8	161.7	53.3582	100.56
Karlovac	KARLOVAC, Prirodoslovna	KAR_Kar_Prir	OTHER	1999-03-30	2017-04-07	18.0233	18-20	PULA	ISTRA	3	NO	NO	NEITHER	160.9	92.2	161.1	57.3027	100.124
Karlovac	KARLOVAC, Prirodoslovna	KAR_Kar_Prir	OTHER	1999-03-09	2017-04-07	18.0808	18-20	PULA	ISTRA	3	NO	NO	NEITHER	165.5
Karlovac	KARLOVAC, Prirodoslovna	KAR_Kar_Prir	OTHER	1999-01-29	2017-04-07	18.1875	18-20	PULA	ISTRA	3	NO	NO	NEITHER	164.8
Karlovac	KARLOVAC, Prirodoslovna	KAR_Kar_Prir	OTHER	1999-01-21	2017-04-07	18.2094	18-20	PULA	ISTRA	3	NO	NO	NEITHER	178.2	95.6	177.7	53.6476	99.7194
Karlovac	KARLOVAC, Prirodoslovna	KAR_Kar_Prir	OTHER	1999-01-12	2017-04-07	18.2341	18-20	ROVINJ	ISTRA	2	NO	YES	ONE PARENT	167.3	88.9	173.6	53.1381	103.766
Karlovac	KARLOVAC, Prirodoslovna	KAR_Kar_Prir	OTHER	1998-12-08	2017-04-07	18.3299	18-20	VODNJAN	ISTRA	1	NO	NO	NEITHER	170.7
Karlovac	KARLOVAC, Prirodoslovna	KAR_Kar_Prir	OTHER	1998-12-08	2017-04-07	18.3299	18-20	VRH LAŠIĆI	ISTRA	1	NO	NO	NEITHER	163.1
Karlovac	KARLOVAC, Prirodoslovna	KAR_Kar_Prir	OTHER	1998-06-04	2017-04-07	18.8419	18-20	GRAB	SPLIT-DALMACIJA	1	unavailable	unavailable	unavailable	161.8
Karlovac	KARLOVAC, Prirodoslovna	KAR_Kar_Prir	OTHER	1998-05-02	2017-04-07	18.9322	18-20	KOŠUTE	SPLIT-DALMACIJA	1	unavailable	unavailable	unavailable	171.5
Karlovac	KARLOVAC, Prirodoslovna	KAR_Kar_Prir	OTHER	1998-04-15	2017-04-07	18.9788	18-20	PUČIŠČA	SPLIT-DALMACIJA	1	unavailable	unavailable	unavailable	168.5
Karlovac	KARLOVAC, Prirodoslovna	KAR_Kar_Prir	OTHER	1998-05-25	2017-04-07	18.8693	18-20	SINJ	SPLIT-DALMACIJA	2	unavailable	unavailable	unavailable	163.3
Karlovac	KARLOVAC, Prirodoslovna	KAR_Kar_Prir	OTHER	1998-04-09	2017-04-07	18.9952	18-20	SPLIT	SPLIT-DALMACIJA	3	unavailable	unavailable	unavailable	157.3
Karlovac	KARLOVAC, Prirodoslovna	KAR_Kar_Prir	OTHER	1998-04-06	2017-04-07	19.0034	18-20	SPLIT	SPLIT-DALMACIJA	3	unavailable	unavailable	unavailable	158.5
Karlovac	KARLOVAC, Prirodoslovna	KAR_Kar_Prir	OTHER	1998-03-30	2017-04-07	19.0226	18-20	SPLIT	SPLIT-DALMACIJA	3	unavailable	unavailable	unavailable	174
Karlovac	KARLOVAC, Prirodoslovna	KAR_Kar_Prir	OTHER	1997-12-29	2017-04-07	19.2717	18-20	ŠIBENIK	ŠIBENIK-KNIN	3	unavailable	unavailable	unavailable	163.5
Karlovac	KARLOVAC, Prirodoslovna	KAR_Kar_Prir	OTHER	1997-12-24	2017-04-07	19.2854	18-20	ŠIBENIK	ŠIBENIK-KNIN	3	unavailable	unavailable	unavailable	166.3
Karlovac	KARLOVAC, Prirodoslovna	KAR_Kar_Prir	OTHER	1998-06-21	2017-04-07	18.7953	18-20	MAKARSKA	SPLIT-DALMACIJA	2	YES	NO	ONE PARENT	181.5
Karlovac	KARLOVAC, Prirodoslovna	KAR_Kar_Prir	OTHER	1999-01-28	2017-04-07	18.1903	18-20	PULA	ISTRA	3	YES	YES	BOTH PARENTS	175.9
Karlovac	KARLOVAC, Šumarska i drvodjeljska	KAR_Kar_Sum	OTHER	1998-06-24	2017-04-07	18.7871	18-20	BAŠKA VODA	SPLIT-DALMACIJA	1	NO	YES	ONE PARENT	165.1
Karlovac	KARLOVAC, Šumarska i drvodjeljska	KAR_Kar_Sum	OTHER	1998-07-27	2017-04-07	18.6968	18-20	BRINJE	LIKA-SENJ	1	NO	NO	NEITHER	167.8
Karlovac	KARLOVAC, Šumarska i drvodjeljska	KAR_Kar_Sum	OTHER	1999-02-24	2017-04-07	18.1164	18-20	PULA	ISTRA	3	NO	NO	NEITHER	165.8
Karlovac	KARLOVAC, Šumarska i drvodjeljska	KAR_Kar_Sum	OTHER	1997-11-18	2017-04-07	19.384	18-20	ŠIBENIK	ŠIBENIK-KNIN	3	unavailable	unavailable	unavailable	164.7
Karlovac	KARLOVAC, Tehnička	KAR_Kar_Teh	OTHER	1998-08-19	2017-04-07	18.6338	18-20	OGULIN	KARLOVAC	2	YES	NO	ONE PARENT	164.6
Karlovac	KARLOVAC, Trgovačko-ugostiteljska	KAR_Kar_Trg	OTHER	1997-04-26	2017-04-07	19.948	18-20	GRAČAC	ZADAR	1	NO	NO	NEITHER	170.1
Karlovac	KARLOVAC, Trgovačko-ugostiteljska	KAR_Kar_Trg	OTHER	1997-10-05	2017-04-07	19.5044	18-20	GREBAŠTICA	ŠIBENIK-KNIN	1	NO	YES	ONE PARENT	163.3
Karlovac	KARLOVAC, Trgovačko-ugostiteljska	KAR_Kar_Trg	OTHER	1998-06-26	2017-04-07	18.7817	18-20	KAMENMOST	SPLIT-DALMACIJA	1	NO	NO	NEITHER	167
Karlovac	KARLOVAC, Trgovačko-ugostiteljska	KAR_Kar_Trg	OTHER	1999-01-06	2017-04-07	18.2505	18-20	MEDULIN	ISTRA	1	NO	NO	NEITHER	164.1
Karlovac	KARLOVAC, Trgovačko-ugostiteljska	KAR_Kar_Trg	OTHER	1998-08-22	2017-04-07	18.6256	18-20	OGULIN	KARLOVAC	2	NO	NO	NEITHER	173.5
Karlovac	KARLOVAC, Trgovačko-ugostiteljska	KAR_Kar_Trg	OTHER	1999-03-01	2017-04-07	18.1027	18-20	PULA	ISTRA	3	NO	YES	ONE PARENT	168.4
Karlovac	KARLOVAC, Trgovačko-ugostiteljska	KAR_Kar_Trg	OTHER	1999-02-11	2017-04-07	18.152	18-20	PULA	ISTRA	3	NO	YES	ONE PARENT	174.2
Karlovac	KARLOVAC, Trgovačko-ugostiteljska	KAR_Kar_Trg	OTHER	1999-01-16	2017-04-07	18.2231	18-20	PULA	ISTRA	3	NO	NO	NEITHER	168	92.6	169.5	55.119	100.893
Karlovac	KARLOVAC, Trgovačko-ugostiteljska	KAR_Kar_Trg	OTHER	1998-07-19	2017-04-07	18.7187	18-20	SENJ	LIKA-SENJ	1	NO	NO	NEITHER	163
Karlovac	KARLOVAC, Trgovačko-ugostiteljska	KAR_Kar_Trg	OTHER	1997-08-12	2017-04-07	19.6523	18-20	ŠIBENIK	ŠIBENIK-KNIN	3	NO	NO	NEITHER	175.5
Karlovac	KARLOVAC, Trgovačko-ugostiteljska	KAR_Kar_Trg	OTHER	1998-04-14	2017-04-07	18.9815	18-20	SINJ	SPLIT-DALMACIJA	2	unavailable	unavailable	unavailable	166.3
Karlovac	KARLOVAC, Trgovačko-ugostiteljska	KAR_Kar_Trg	OTHER	1997-12-24	2017-04-07	19.2854	18-20	ŠIBENIK	ŠIBENIK-KNIN	3	unavailable	unavailable	unavailable	166.9
Karlovac	KARLOVAC, Trgovačko-ugostiteljska	KAR_Kar_Trg	OTHER	1998-05-15	2017-04-07	18.8966	18-20	TRILJ	SPLIT-DALMACIJA	1	unavailable	unavailable	unavailable	158.6
Karlovac	KARLOVAC, Trgovačko-ugostiteljska	KAR_Kar_Trg	OTHER	1999-03-12	2017-04-07	18.0726	18-20	PULA	ISTRA	3	YES	YES	BOTH PARENTS	165.7
Karlovac	KARLOVAC, Trgovačko-ugostiteljska	KAR_Kar_Trg	OTHER	1999-03-12	2017-04-07	18.0726	18-20	PULA	ISTRA	3	YES	YES	BOTH PARENTS	172.4
Karlovac	OGULIN, Gimnazija Bernarda Frankopana	KAR_Ogu_Gim	GIMNAZIJA	1999-01-24	2017-04-07	18.2012	18-20	BUROLI	ISTRA	1	NO	NO	NEITHER	156.6	88.5	158	56.5134	100.894
Karlovac	OGULIN, Gimnazija Bernarda Frankopana	KAR_Ogu_Gim	GIMNAZIJA	1998-09-19	2017-04-07	18.5489	18-20	DRAGANIĆ	KARLOVAC	1	NO	NO	NEITHER	159.4
Karlovac	OGULIN, Gimnazija Bernarda Frankopana	KAR_Ogu_Gim	GIMNAZIJA	1998-08-31	2017-04-07	18.601	18-20	DUGA RESA	KARLOVAC	2	NO	NO	NEITHER	166.6	87.8	164.6	52.7011	98.7995
Karlovac	OGULIN, Gimnazija Bernarda Frankopana	KAR_Ogu_Gim	GIMNAZIJA	1998-09-16	2017-04-07	18.5572	18-20	GORICA SVETOJANSKA	KARLOVAC	1	NO	NO	NEITHER	162.4
Karlovac	OGULIN, Gimnazija Bernarda Frankopana	KAR_Ogu_Gim	GIMNAZIJA	1998-10-30	2017-04-07	18.4367	18-20	KARLOVAC	KARLOVAC	3	NO	YES	ONE PARENT	155.7
Karlovac	OGULIN, Gimnazija Bernarda Frankopana	KAR_Ogu_Gim	GIMNAZIJA	1998-06-19	2017-04-07	18.8008	18-20	MAKARSKA	SPLIT-DALMACIJA	2	NO	NO	NEITHER	162.4
Karlovac	OGULIN, Gimnazija Bernarda Frankopana	KAR_Ogu_Gim	GIMNAZIJA	1999-05-20	2017-04-07	17.8836	17	OPUZEN	DUBROVNIK-NERETVA	1	NO	NO	NEITHER	163.9
Karlovac	OGULIN, Gimnazija Bernarda Frankopana	KAR_Ogu_Gim	GIMNAZIJA	1999-04-24	2017-04-07	17.9548	17	PULA	ISTRA	3	NO	NO	NEITHER	171	91.7	168.9	53.6257	98.7719
Karlovac	OGULIN, Gimnazija Bernarda Frankopana	KAR_Ogu_Gim	GIMNAZIJA	1999-02-18	2017-04-07	18.1328	18-20	PULA	ISTRA	3	NO	NO	NEITHER	166.6
Karlovac	OGULIN, Gimnazija Bernarda Frankopana	KAR_Ogu_Gim	GIMNAZIJA	1999-01-13	2017-04-07	18.2313	18-20	PULA	ISTRA	3	NO	NO	NEITHER	166	90.7	168.6	54.6386	101.566
Karlovac	OGULIN, Gimnazija Bernarda Frankopana	KAR_Ogu_Gim	GIMNAZIJA	1999-01-03	2017-04-07	18.2587	18-20	PULA	ISTRA	3	NO	NO	NEITHER	168.1
Karlovac	OGULIN, Gimnazija Bernarda Frankopana	KAR_Ogu_Gim	GIMNAZIJA	1998-07-01	2017-04-07	18.768	18-20	RUNOVIĆI	SPLIT-DALMACIJA	1	NO	NO	NEITHER	179.3
Karlovac	OGULIN, Gimnazija Bernarda Frankopana	KAR_Ogu_Gim	GIMNAZIJA	1999-01-12	2017-04-07	18.2341	18-20	UMAG	ISTRA	2	NO	YES	ONE PARENT	166.3	89.8	161.6	53.9988	97.1738
Karlovac	OGULIN, Gimnazija Bernarda Frankopana	KAR_Ogu_Gim	GIMNAZIJA	1998-06-29	2017-04-07	18.7734	18-20	ZMIJAVCI	SPLIT-DALMACIJA	1	NO	YES	ONE PARENT	151.5
Karlovac	OGULIN, Gimnazija Bernarda Frankopana	KAR_Ogu_Gim	GIMNAZIJA	1998-04-26	2017-04-07	18.9487	18-20	KAŠTELA	SPLIT-DALMACIJA	3	unavailable	unavailable	unavailable	172.5
Karlovac	OGULIN, Gimnazija Bernarda Frankopana	KAR_Ogu_Gim	GIMNAZIJA	1998-04-29	2017-04-07	18.9405	18-20	SINJ	SPLIT-DALMACIJA	2	unavailable	unavailable	unavailable	165.5
Karlovac	OGULIN, Gimnazija Bernarda Frankopana	KAR_Ogu_Gim	GIMNAZIJA	1998-05-11	2017-04-07	18.9076	18-20	TURJACI	SPLIT-DALMACIJA	1	unavailable	unavailable	unavailable	175.8
Karlovac	OGULIN, Gimnazija Bernarda Frankopana	KAR_Ogu_Gim	GIMNAZIJA	1998-10-20	2017-04-07	18.4641	18-20	KARLOVAC	KARLOVAC	3	YES	YES	BOTH PARENTS	170.7
Karlovac	OGULIN, Gimnazija Bernarda Frankopana	KAR_Ogu_Gim	GIMNAZIJA	1998-10-14	2017-04-07	18.4805	18-20	KARLOVAC	KARLOVAC	3	YES	YES	BOTH PARENTS	170.9
Karlovac	OGULIN, Gimnazija Bernarda Frankopana	KAR_Ogu_Gim	GIMNAZIJA	1998-06-16	2017-04-07	18.809	18-20	MAKARSKA	SPLIT-DALMACIJA	2	YES	YES	BOTH PARENTS	163.7
Karlovac	OGULIN, Gimnazija Bernarda Frankopana	KAR_Ogu_Gim	GIMNAZIJA	1999-03-24	2017-04-07	18.0397	18-20	PULA	ISTRA	3	YES	NO	ONE PARENT	162.9	83.6	167.7	51.3198	102.947
Karlovac	OGULIN, Gimnazija Bernarda Frankopana	KAR_Ogu_Gim	GIMNAZIJA	1999-01-21	2017-04-07	18.2094	18-20	PULA	ISTRA	3	YES	NO	ONE PARENT	165.5	89	167.2	53.7764	101.027
Karlovac	OGULIN, Obrtnička i tehnička	KAR_Ogu_Obr	OTHER	1999-03-29	2017-04-07	18.026	18-20	PULA	ISTRA	3	NO	NO	NEITHER	179.4	88.8	182.5	49.4983	101.728
Karlovac	OGULIN, Obrtnička i tehnička	KAR_Ogu_Obr	OTHER	1999-01-15	2017-04-07	18.2259	18-20	PULA	ISTRA	3	NO	NO	NEITHER	168.8	91.3	167.8	54.0877	99.4076
Karlovac	OGULIN, Obrtnička i tehnička	KAR_Ogu_Obr	OTHER	1999-03-04	2017-04-07	18.0945	18-20	PULA	ISTRA	3	YES	NO	ONE PARENT	163
Lika-Senj	GOSPIĆ, Strukovna	LIK_Gos_Struk	OTHER	1998-10-01	2017-04-04	18.5079	18-20	DUGA RESA	KARLOVAC	2	NO	NO	NEITHER	170.7
Lika-Senj	GOSPIĆ, Strukovna	LIK_Gos_Struk	OTHER	1998-08-01	2017-04-04	18.6749	18-20	KORENICA	LIKA-SENJ	1	NO	NO	NEITHER	164.2
Lika-Senj	GOSPIĆ, Strukovna	LIK_Gos_Struk	OTHER	1998-06-14	2017-04-04	18.8063	18-20	MAKARSKA	SPLIT-DALMACIJA	2	NO	NO	NEITHER	173.5
Lika-Senj	GOSPIĆ, Strukovna	LIK_Gos_Struk	OTHER	1999-03-31	2017-04-04	18.0123	18-20	PULA	ISTRA	3	NO	NO	NEITHER	159.2	82.7	158.5	51.9472	99.5603
Lika-Senj	GOSPIĆ, Strukovna	LIK_Gos_Struk	OTHER	1999-02-11	2017-04-04	18.1437	18-20	PULA	ISTRA	3	NO	NO	NEITHER	182.4
Lika-Senj	GOSPIĆ, Strukovna	LIK_Gos_Struk	OTHER	1998-06-30	2017-04-04	18.7625	18-20	RUNOVIĆI	SPLIT-DALMACIJA	1	NO	NO	NEITHER	172
Lika-Senj	GOSPIĆ, Strukovna	LIK_Gos_Struk	OTHER	1998-06-25	2017-04-04	18.7762	18-20	ZMIJAVCI	SPLIT-DALMACIJA	1	NO	NO	NEITHER	171.6
Lika-Senj	GOSPIĆ, Strukovna	LIK_Gos_Struk	OTHER	1998-06-01	2017-04-04	18.8419	18-20	HRVACE	SPLIT-DALMACIJA	1	unavailable	unavailable	unavailable	174.6
Lika-Senj	GOSPIĆ, Strukovna	LIK_Gos_Struk	OTHER	1998-04-19	2017-04-04	18.9596	18-20	KAŠTELA	SPLIT-DALMACIJA	3	unavailable	unavailable	unavailable	175.1
Lika-Senj	GOSPIĆ, Strukovna	LIK_Gos_Struk	OTHER	1999-02-09	2017-04-04	18.1492	18-20	PULA	ISTRA	3	YES	YES	BOTH PARENTS	159.1
Lika-Senj	GOSPIĆ, Strukovna	LIK_Gos_Struk	OTHER	1999-01-22	2017-04-04	18.1985	18-20	VALBANDON	ISTRA	1	YES	YES	BOTH PARENTS	154.9
Lika-Senj	KORENICA, Srednja škola Plitvička jezera	LIK_Kor_Sred	MIXED	1998-08-27	2017-04-04	18.6037	18-20	DUGA RESA	KARLOVAC	2	NO	NO	NEITHER	170.5	89.3	173	52.3754	101.466
Lika-Senj	KORENICA, Srednja škola Plitvička jezera	LIK_Kor_Sred	MIXED	1998-07-24	2017-04-04	18.6968	18-20	HRVATSKO POLJE	LIKA-SENJ	1	NO	NO	NEITHER	168.8
Lika-Senj	KORENICA, Srednja škola Plitvička jezera	LIK_Kor_Sred	MIXED	1998-08-25	2017-04-04	18.6092	18-20	KARLOVAC	KARLOVAC	3	NO	YES	ONE PARENT	177.6	88.8	176	50	99.0991
Lika-Senj	KORENICA, Srednja škola Plitvička jezera	LIK_Kor_Sred	MIXED	1998-09-06	2017-04-04	18.5763	18-20	OGULIN	KARLOVAC	2	NO	NO	NEITHER	171.4
Lika-Senj	KORENICA, Srednja škola Plitvička jezera	LIK_Kor_Sred	MIXED	1998-08-13	2017-04-04	18.642	18-20	OGULIN	KARLOVAC	2	NO	YES	ONE PARENT	171.1
Lika-Senj	KORENICA, Srednja škola Plitvička jezera	LIK_Kor_Sred	MIXED	1998-07-18	2017-04-04	18.7132	18-20	OTOČAC	LIKA-SENJ	1	NO	YES	ONE PARENT	167.3
Lika-Senj	KORENICA, Srednja škola Plitvička jezera	LIK_Kor_Sred	MIXED	1999-01-31	2017-04-04	18.1739	18-20	PULA	ISTRA	3	NO	NO	NEITHER	167.7
Lika-Senj	KORENICA, Srednja škola Plitvička jezera	LIK_Kor_Sred	MIXED	1999-01-30	2017-04-04	18.1766	18-20	PULA	ISTRA	3	NO	NO	NEITHER	165.5
Lika-Senj	KORENICA, Srednja škola Plitvička jezera	LIK_Kor_Sred	MIXED	1999-01-01	2017-04-04	18.256	18-20	PULA	ISTRA	3	NO	NO	NEITHER	155.5
Lika-Senj	KORENICA, Srednja škola Plitvička jezera	LIK_Kor_Sred	MIXED	1998-09-21	2017-04-04	18.5352	18-20	SLUNJ	KARLOVAC	1	NO	YES	ONE PARENT	164.6
Lika-Senj	KORENICA, Srednja škola Plitvička jezera	LIK_Kor_Sred	MIXED	1998-06-08	2017-04-04	18.8227	18-20	VELIKO BRDO	SPLIT-DALMACIJA	1	NO	YES	ONE PARENT	165.7
Lika-Senj	KORENICA, Srednja škola Plitvička jezera	LIK_Kor_Sred	MIXED	1998-03-18	2017-04-04	19.0472	18-20	DRNIŠ	ŠIBENIK-KNIN	1	unavailable	unavailable	unavailable	168.4
Lika-Senj	KORENICA, Srednja škola Plitvička jezera	LIK_Kor_Sred	MIXED	1998-06-03	2017-04-04	18.8364	18-20	GLAVICE	SPLIT-DALMACIJA	1	unavailable	unavailable	unavailable	170.7
Lika-Senj	KORENICA, Srednja škola Plitvička jezera	LIK_Kor_Sred	MIXED	1998-04-15	2017-04-04	18.9706	18-20	OMIŠ	SPLIT-DALMACIJA	2	unavailable	unavailable	unavailable	163
Lika-Senj	KORENICA, Srednja škola Plitvička jezera	LIK_Kor_Sred	MIXED	1998-11-18	2017-04-04	18.3765	18-20	KARLOVAC	KARLOVAC	3	YES	NO	ONE PARENT	180.9	93.8	179.6	51.8519	99.2814
Lika-Senj	KORENICA, Srednja škola Plitvička jezera	LIK_Kor_Sred	MIXED	1998-10-14	2017-04-04	18.4723	18-20	KARLOVAC	KARLOVAC	3	YES	YES	BOTH PARENTS	180.6
Lika-Senj	OTOČAC, Srednja škola	LIK_Oto_Sred	MIXED	1998-09-30	2017-04-04	18.5106	18-20	GORNJE MEKUŠJE	KARLOVAC	1	NO	NO	NEITHER	172.3
Lika-Senj	OTOČAC, Srednja škola	LIK_Oto_Sred	MIXED	1997-02-26	2017-04-04	20.1013	18-20	GRAČAC	ZADAR	1	NO	NO	NEITHER	165.6
Lika-Senj	OTOČAC, Srednja škola	LIK_Oto_Sred	MIXED	1998-10-24	2017-04-04	18.4449	18-20	KARLOVAC	KARLOVAC	3	NO	NO	NEITHER	169.1
Lika-Senj	OTOČAC, Srednja škola	LIK_Oto_Sred	MIXED	1998-10-19	2017-04-04	18.4586	18-20	KARLOVAC	KARLOVAC	3	NO	NO	NEITHER	169.5
Lika-Senj	OTOČAC, Srednja škola	LIK_Oto_Sred	MIXED	1998-09-09	2017-04-04	18.5681	18-20	KARLOVAC	KARLOVAC	3	NO	NO	NEITHER	160.8
Lika-Senj	OTOČAC, Srednja škola	LIK_Oto_Sred	MIXED	1998-07-22	2017-04-04	18.7023	18-20	KRIŽ-KAMENICA	LIKA-SENJ	1	NO	NO	NEITHER	165
Lika-Senj	OTOČAC, Srednja škola	LIK_Oto_Sred	MIXED	1998-08-11	2017-04-04	18.6475	18-20	OGULIN	KARLOVAC	2	NO	NO	NEITHER	173.2
Lika-Senj	OTOČAC, Srednja škola	LIK_Oto_Sred	MIXED	1999-03-29	2017-04-04	18.0178	18-20	PULA	ISTRA	3	NO	NO	NEITHER	161.5	86.4	160.9	53.4985	99.6285
Lika-Senj	OTOČAC, Srednja škola	LIK_Oto_Sred	MIXED	1999-03-22	2017-04-04	18.037	18-20	PULA	ISTRA	3	NO	NO	NEITHER	173.4	90.7	166.8	52.3068	96.1938
Lika-Senj	OTOČAC, Srednja škola	LIK_Oto_Sred	MIXED	1999-03-08	2017-04-04	18.0753	18-20	PULA	ISTRA	3	NO	YES	ONE PARENT	173
Lika-Senj	OTOČAC, Srednja škola	LIK_Oto_Sred	MIXED	1999-03-01	2017-04-04	18.0945	18-20	PULA	ISTRA	3	NO	NO	NEITHER	161.1
Lika-Senj	OTOČAC, Srednja škola	LIK_Oto_Sred	MIXED	1999-01-19	2017-04-04	18.2067	18-20	PULA	ISTRA	3	NO	NO	NEITHER	170.9	92	166.3	53.8327	97.3084
Lika-Senj	OTOČAC, Srednja škola	LIK_Oto_Sred	MIXED	1999-01-18	2017-04-04	18.2094	18-20	PULA	ISTRA	3	NO	NO	NEITHER	172.8	94.4	169.2	54.6296	97.9167
Lika-Senj	OTOČAC, Srednja škola	LIK_Oto_Sred	MIXED	1998-12-29	2017-04-04	18.2642	18-20	PULA	ISTRA	3	NO	NO	NEITHER	160.7
Lika-Senj	OTOČAC, Srednja škola	LIK_Oto_Sred	MIXED	1998-12-28	2017-04-04	18.2669	18-20	PULA	ISTRA	3	NO	NO	NEITHER	152.8
Lika-Senj	OTOČAC, Srednja škola	LIK_Oto_Sred	MIXED	1998-06-27	2017-04-04	18.7707	18-20	SPLIT	SPLIT-DALMACIJA	3	NO	NO	NEITHER	164.5
Lika-Senj	OTOČAC, Srednja škola	LIK_Oto_Sred	MIXED	1998-04-27	2017-04-04	18.9377	18-20	SINJ	SPLIT-DALMACIJA	2	unavailable	unavailable	unavailable	166
Lika-Senj	OTOČAC, Srednja škola	LIK_Oto_Sred	MIXED	1998-04-08	2017-04-04	18.9897	18-20	SINJ	SPLIT-DALMACIJA	2	unavailable	unavailable	unavailable	172.4
Lika-Senj	OTOČAC, Srednja škola	LIK_Oto_Sred	MIXED	1998-09-20	2017-04-04	18.538	18-20	CETINGRAD	KARLOVAC	1	YES	NO	ONE PARENT	171
Lika-Senj	OTOČAC, Srednja škola	LIK_Oto_Sred	MIXED	1998-10-13	2017-04-04	18.475	18-20	KARLOVAC	KARLOVAC	3	YES	YES	BOTH PARENTS	171.1
Lika-Senj	OTOČAC, Srednja škola	LIK_Oto_Sred	MIXED	1999-02-05	2017-04-04	18.1602	18-20	PULA	ISTRA	3	YES	NO	ONE PARENT	165.1
Lika-Senj	OTOČAC, Srednja škola	LIK_Oto_Sred	MIXED	1998-07-12	2017-04-04	18.7296	18-20	VRHOVINE	LIKA-SENJ	1	YES	NO	ONE PARENT	172.2
Split-Dalmacija	IMOTSKI, Gimnazija	SPL_Imo_Gim	GIMNAZIJA	1999-02-15	2017-05-16	18.2478	18-20	BUZET	ISTRA	1	NO	NO	NEITHER	164.2
Split-Dalmacija	IMOTSKI, Gimnazija	SPL_Imo_Gim	GIMNAZIJA	1999-01-05	2017-05-16	18.36	18-20	KARLOVAC	KARLOVAC	3	NO	NO	NEITHER	160.4	87.1	158.2	54.3017	98.6284
Split-Dalmacija	IMOTSKI, Gimnazija	SPL_Imo_Gim	GIMNAZIJA	1998-12-20	2017-05-16	18.4038	18-20	KARLOVAC	KARLOVAC	3	NO	NO	NEITHER	171.4	93.7	164.5	54.6674	95.9743
Split-Dalmacija	IMOTSKI, Gimnazija	SPL_Imo_Gim	GIMNAZIJA	1998-11-07	2017-05-16	18.5216	18-20	KARLOVAC	KARLOVAC	3	NO	NO	NEITHER	167.7
Split-Dalmacija	IMOTSKI, Gimnazija	SPL_Imo_Gim	GIMNAZIJA	1998-10-22	2017-05-16	18.5654	18-20	KARLOVAC	KARLOVAC	3	NO	NO	NEITHER	166.9
Split-Dalmacija	IMOTSKI, Gimnazija	SPL_Imo_Gim	GIMNAZIJA	1998-12-15	2017-05-16	18.4175	18-20	OZALJ	KARLOVAC	1	NO	NO	NEITHER	169.6	90.6	169	53.4198	99.6462
Split-Dalmacija	IMOTSKI, Gimnazija	SPL_Imo_Gim	GIMNAZIJA	1998-07-23	2017-05-16	18.8145	18-20	PROMAJNA	SPLIT-DALMACIJA	1	NO	YES	ONE PARENT	168.9
Split-Dalmacija	IMOTSKI, Gimnazija	SPL_Imo_Gim	GIMNAZIJA	1998-07-22	2017-05-16	18.8172	18-20	SUĆURAJ	SPLIT-DALMACIJA	1	NO	NO	NEITHER	168.9
Split-Dalmacija	IMOTSKI, Gimnazija	SPL_Imo_Gim	GIMNAZIJA	1999-01-17	2017-05-16	18.3272	18-20	SV. PETAR U ŠUMI	ISTRA	1	NO	NO	NEITHER	152.1
Split-Dalmacija	IMOTSKI, Gimnazija	SPL_Imo_Gim	GIMNAZIJA	1998-07-14	2017-05-16	18.8392	18-20	GLJEV	SPLIT-DALMACIJA	1	unavailable	unavailable	unavailable	171.8
Split-Dalmacija	IMOTSKI, Gimnazija	SPL_Imo_Gim	GIMNAZIJA	1998-06-05	2017-05-16	18.9459	18-20	GRABOVAC	KARLOVAC	1	unavailable	unavailable	unavailable	169.3
Split-Dalmacija	IMOTSKI, Gimnazija	SPL_Imo_Gim	GIMNAZIJA	1998-06-05	2017-05-16	18.9459	18-20	IMOTSKI	SPLIT-DALMACIJA	2	unavailable	unavailable	unavailable	166.1
Split-Dalmacija	IMOTSKI, Gimnazija	SPL_Imo_Gim	GIMNAZIJA	1998-04-27	2017-05-16	19.0527	18-20	JEZERA	ŠIBENIK-KNIN	1	unavailable	unavailable	unavailable	170
Split-Dalmacija	IMOTSKI, Gimnazija	SPL_Imo_Gim	GIMNAZIJA	1998-06-04	2017-05-16	18.9487	18-20	KAŠTELA	SPLIT-DALMACIJA	3	unavailable	unavailable	unavailable	177.2
Split-Dalmacija	IMOTSKI, Gimnazija	SPL_Imo_Gim	GIMNAZIJA	1998-04-19	2017-05-16	19.0746	18-20	KNIN	ŠIBENIK-KNIN	2	unavailable	unavailable	unavailable	169.5
Split-Dalmacija	IMOTSKI, Gimnazija	SPL_Imo_Gim	GIMNAZIJA	1998-07-07	2017-05-16	18.8583	18-20	OTOK	SPLIT-DALMACIJA	1	unavailable	unavailable	unavailable	171.1
Split-Dalmacija	IMOTSKI, Gimnazija	SPL_Imo_Gim	GIMNAZIJA	1998-04-06	2017-05-16	19.1102	18-20	RAŽINE	ŠIBENIK-KNIN	1	unavailable	unavailable	unavailable	174.7
Split-Dalmacija	IMOTSKI, Gimnazija	SPL_Imo_Gim	GIMNAZIJA	1998-06-30	2017-05-16	18.8775	18-20	SINJ	SPLIT-DALMACIJA	2	unavailable	unavailable	unavailable	162.3
Split-Dalmacija	IMOTSKI, Gimnazija	SPL_Imo_Gim	GIMNAZIJA	1998-05-21	2017-05-16	18.987	18-20	SINJ	SPLIT-DALMACIJA	2	unavailable	unavailable	unavailable	171.4
Split-Dalmacija	IMOTSKI, Gimnazija	SPL_Imo_Gim	GIMNAZIJA	1998-12-02	2017-05-16	18.4531	18-20	KARLOVAC	KARLOVAC	3	YES	YES	BOTH PARENTS	177.2
Split-Dalmacija	IMOTSKI, Gimnazija	SPL_Imo_Gim	GIMNAZIJA	1998-10-23	2017-05-16	18.5626	18-20	KARLOVAC	KARLOVAC	3	YES	NO	ONE PARENT	165.2
Split-Dalmacija	IMOTSKI, Gimnazija	SPL_Imo_Gim	GIMNAZIJA	1998-09-15	2017-05-16	18.6667	18-20	LIČKI OSIK	LIKA-SENJ	1	YES	NO	ONE PARENT	179
Split-Dalmacija	IMOTSKI, Gimnazija	SPL_Imo_Gim	GIMNAZIJA	1998-11-04	2017-05-16	18.5298	18-20	OGULIN	KARLOVAC	2	YES	NO	ONE PARENT	170.8
Split-Dalmacija	IMOTSKI, Gimnazija	SPL_Imo_Gim	GIMNAZIJA	1999-03-05	2017-05-16	18.1985	18-20	VALBANDON	ISTRA	1	YES	NO	ONE PARENT	164.1
Split-Dalmacija	IMOTSKI, Obrtničko-industrijska	SPL_Imo_Obr	OTHER	2000-03-05	2017-05-10	17.18	17	METKOVIĆ	DUBROVNIK-NERETVA	2	NO	YES	ONE PARENT	165.9
Split-Dalmacija	IMOTSKI, Obrtničko-industrijska	SPL_Imo_Obr	OTHER	1999-10-12	2017-05-10	17.577	17	METKOVIĆ	DUBROVNIK-NERETVA	2	NO	YES	ONE PARENT	176.5
Split-Dalmacija	IMOTSKI, Obrtničko-industrijska	SPL_Imo_Obr	OTHER	1999-08-09	2017-05-10	17.7522	17	METKOVIĆ	DUBROVNIK-NERETVA	2	NO	NO	NEITHER	174.2
Split-Dalmacija	IMOTSKI, Obrtničko-industrijska	SPL_Imo_Obr	OTHER	1999-07-30	2017-05-10	17.7796	17	METKOVIĆ	DUBROVNIK-NERETVA	2	NO	NO	NEITHER	168
Split-Dalmacija	IMOTSKI, Obrtničko-industrijska	SPL_Imo_Obr	OTHER	1999-07-23	2017-05-10	17.7988	17	NEUM	DUBROVNIK-NERETVA	1	NO	YES	ONE PARENT	188
Split-Dalmacija	IMOTSKI, Obrtničko-industrijska	SPL_Imo_Obr	OTHER	1999-09-08	2017-05-10	17.6701	17	METKOVIĆ	DUBROVNIK-NERETVA	2	YES	NO	ONE PARENT	160.1
Split-Dalmacija	MAKARSKA, Srednja strukovna	SPL_Mak_Struk	OTHER	1998-12-07	2017-05-11	18.4257	18-20	DUGA RESA	KARLOVAC	2	NO	NO	NEITHER	175.9
Split-Dalmacija	MAKARSKA, Srednja strukovna	SPL_Mak_Struk	OTHER	1999-01-06	2017-05-11	18.3436	18-20	GENERALSKI STOL	KARLOVAC	1	NO	NO	NEITHER	155.1	85.7	151	55.2547	97.3565
Split-Dalmacija	MAKARSKA, Srednja strukovna	SPL_Mak_Struk	OTHER	1998-10-19	2017-05-11	18.5599	18-20	GORNJI ZVEČAJ	KARLOVAC	1	NO	NO	NEITHER	171.1
Split-Dalmacija	MAKARSKA, Srednja strukovna	SPL_Mak_Struk	OTHER	1998-12-28	2017-05-11	18.3682	18-20	KARLOVAC	KARLOVAC	3	NO	NO	NEITHER	168	89.7	167.9	53.3929	99.9405
Split-Dalmacija	MAKARSKA, Srednja strukovna	SPL_Mak_Struk	OTHER	1998-11-25	2017-05-11	18.4586	18-20	KARLOVAC	KARLOVAC	3	NO	YES	ONE PARENT	162.7
Split-Dalmacija	MAKARSKA, Srednja strukovna	SPL_Mak_Struk	OTHER	1998-10-03	2017-05-11	18.6037	18-20	KARLOVAC	KARLOVAC	3	NO	NO	NEITHER	158.5	86.5	160.5	54.5741	101.262
Split-Dalmacija	MAKARSKA, Srednja strukovna	SPL_Mak_Struk	OTHER	2000-01-31	2017-05-11	17.2758	17	METKOVIĆ	DUBROVNIK-NERETVA	2	NO	NO	NEITHER	177.4
Split-Dalmacija	MAKARSKA, Srednja strukovna	SPL_Mak_Struk	OTHER	1999-10-01	2017-05-11	17.6099	17	METKOVIĆ	DUBROVNIK-NERETVA	2	NO	NO	NEITHER	170.8
Split-Dalmacija	MAKARSKA, Srednja strukovna	SPL_Mak_Struk	OTHER	1999-09-01	2017-05-11	17.692	17	METKOVIĆ	DUBROVNIK-NERETVA	2	NO	NO	NEITHER	161.5
Split-Dalmacija	MAKARSKA, Srednja strukovna	SPL_Mak_Struk	OTHER	1998-12-11	2017-05-11	18.4148	18-20	OBEŽ VIVODINSKI	KARLOVAC	1	NO	NO	NEITHER	163.9	91.2	163.4	55.6437	99.6949
Split-Dalmacija	MAKARSKA, Srednja strukovna	SPL_Mak_Struk	OTHER	1999-02-24	2017-05-11	18.2094	18-20	PULA	ISTRA	3	NO	NO	NEITHER	150.3	85.1	149.6	56.6201	99.5343
Split-Dalmacija	MAKARSKA, Srednja strukovna	SPL_Mak_Struk	OTHER	1998-12-09	2017-05-11	18.4203	18-20	VOJNIĆ	KARLOVAC	1	NO	NO	NEITHER	161.1	88.5	159.9	54.9348	99.2551
Split-Dalmacija	MAKARSKA, Srednja strukovna	SPL_Mak_Struk	OTHER	1998-04-26	2017-05-11	19.0418	18-20	BORAJA	ŠIBENIK-KNIN	1	unavailable	unavailable	unavailable	176.4
Split-Dalmacija	MAKARSKA, Srednja strukovna	SPL_Mak_Struk	OTHER	1998-04-24	2017-05-11	19.0472	18-20	DUBRAVA	SPLIT-DALMACIJA	1	unavailable	unavailable	unavailable	171.5
Split-Dalmacija	MAKARSKA, Srednja strukovna	SPL_Mak_Struk	OTHER	1998-06-04	2017-05-11	18.935	18-20	RUDA	SPLIT-DALMACIJA	1	unavailable	unavailable	unavailable	170
Split-Dalmacija	MAKARSKA, Srednja strukovna	SPL_Mak_Struk	OTHER	1998-06-28	2017-05-11	18.8693	18-20	SINJ	SPLIT-DALMACIJA	2	unavailable	unavailable	unavailable	165.2
Split-Dalmacija	MAKARSKA, Srednja strukovna	SPL_Mak_Struk	OTHER	1998-02-08	2017-05-11	19.2526	18-20	ŠIBENIK	ŠIBENIK-KNIN	3	unavailable	unavailable	unavailable	170.8
Split-Dalmacija	MAKARSKA, Srednja strukovna	SPL_Mak_Struk	OTHER	1998-06-16	2017-05-11	18.9021	18-20	TURJACI	SPLIT-DALMACIJA	1	unavailable	unavailable	unavailable	178
Split-Dalmacija	MAKARSKA, Srednja strukovna	SPL_Mak_Struk	OTHER	2000-03-16	2017-05-11	17.1526	17	METKOVIĆ	DUBROVNIK-NERETVA	2	YES	YES	BOTH PARENTS	161.7
Split-Dalmacija	MAKARSKA, Srednja strukovna	SPL_Mak_Struk	OTHER	2000-03-05	2017-05-11	17.1828	17	METKOVIĆ	DUBROVNIK-NERETVA	2	YES	NO	ONE PARENT	159.7
Split-Dalmacija	MAKARSKA, Srednja strukovna	SPL_Mak_Struk	OTHER	1999-12-08	2017-05-11	17.4237	17	METKOVIĆ	DUBROVNIK-NERETVA	2	YES	NO	ONE PARENT	156.2
Split-Dalmacija	MAKARSKA, Srednja strukovna	SPL_Mak_Struk	OTHER	1999-09-01	2017-05-11	17.692	17	METKOVIĆ	DUBROVNIK-NERETVA	2	YES	YES	BOTH PARENTS	167.3
Split-Dalmacija	MAKARSKA, Srednja strukovna	SPL_Mak_Struk	OTHER	1999-01-10	2017-05-11	18.3326	18-20	PULA	ISTRA	3	YES	NO	ONE PARENT	159.6	86.2	157	54.01	98.3709
Split-Dalmacija	SINJ, Srednja strukovna bana J. Jelačića	SPL_Sinj_Struk	OTHER	1998-08-12	2017-02-09	18.4969	18-20	???	KARLOVAC	1	NO	NO	NEITHER	161.6
Split-Dalmacija	SINJ, Srednja strukovna bana J. Jelačića	SPL_Sinj_Struk	OTHER	1998-04-28	2017-02-09	18.7871	18-20	BAŠKA VODA	SPLIT-DALMACIJA	1	NO	NO	NEITHER	168.9
Split-Dalmacija	SINJ, Srednja strukovna bana J. Jelačića	SPL_Sinj_Struk	OTHER	1998-07-08	2017-02-09	18.5927	18-20	BRAJAKOVO BRDO	KARLOVAC	1	NO	NO	NEITHER	176.3	94.7	174.7	53.7153	99.0925
Split-Dalmacija	SINJ, Srednja strukovna bana J. Jelačića	SPL_Sinj_Struk	OTHER	1998-06-16	2017-02-09	18.653	18-20	BRINJE	LIKA-SENJ	1	NO	NO	NEITHER	163.3
Split-Dalmacija	SINJ, Srednja strukovna bana J. Jelačića	SPL_Sinj_Struk	OTHER	1998-08-09	2017-02-09	18.5051	18-20	CEROVAČKI GALOVIČI	KARLOVAC	1	NO	NO	NEITHER	164.9
Split-Dalmacija	SINJ, Srednja strukovna bana J. Jelačića	SPL_Sinj_Struk	OTHER	1998-11-11	2017-02-09	18.2478	18-20	CUKRIĆI	ISTRA	1	NO	NO	NEITHER	162.2
Split-Dalmacija	SINJ, Srednja strukovna bana J. Jelačića	SPL_Sinj_Struk	OTHER	1998-10-11	2017-02-09	18.3326	18-20	DONJI NIKŠIĆ	KARLOVAC	1	NO	NO	NEITHER	167.4	87	171.4	51.9713	102.389
Split-Dalmacija	SINJ, Srednja strukovna bana J. Jelačića	SPL_Sinj_Struk	OTHER	1999-01-18	2017-02-09	18.0616	18-20	FAŽANA	ISTRA	1	NO	YES	ONE PARENT	168.8
Split-Dalmacija	SINJ, Srednja strukovna bana J. Jelačića	SPL_Sinj_Struk	OTHER	1997-04-24	2017-02-09	19.7974	18-20	GRAČAC	ZADAR	1	NO	NO	NEITHER	165.4
Split-Dalmacija	SINJ, Srednja strukovna bana J. Jelačića	SPL_Sinj_Struk	OTHER	1998-07-20	2017-02-09	18.5599	18-20	GVOZD	KARLOVAC	1	NO	NO	NEITHER	175.9
Split-Dalmacija	SINJ, Srednja strukovna bana J. Jelačića	SPL_Sinj_Struk	OTHER	1998-09-30	2017-02-09	18.3628	18-20	KARLOVAC	KARLOVAC	3	NO	NO	NEITHER	162	87.7	159.1	54.1358	98.2099
Split-Dalmacija	SINJ, Srednja strukovna bana J. Jelačića	SPL_Sinj_Struk	OTHER	1998-09-28	2017-02-09	18.3682	18-20	KARLOVAC	KARLOVAC	3	NO	YES	ONE PARENT	163.7	84.7	164.1	51.741	100.244
Split-Dalmacija	SINJ, Srednja strukovna bana J. Jelačića	SPL_Sinj_Struk	OTHER	1998-09-12	2017-02-09	18.412	18-20	KARLOVAC	KARLOVAC	3	NO	NO	NEITHER	174.1	92.5	175	53.1304	100.517
Split-Dalmacija	SINJ, Srednja strukovna bana J. Jelačića	SPL_Sinj_Struk	OTHER	1998-09-04	2017-02-09	18.4339	18-20	KARLOVAC	KARLOVAC	3	NO	NO	NEITHER	167.2
Split-Dalmacija	SINJ, Srednja strukovna bana J. Jelačića	SPL_Sinj_Struk	OTHER	1998-08-29	2017-02-09	18.4504	18-20	KARLOVAC	KARLOVAC	3	NO	NO	NEITHER	171.1
Split-Dalmacija	SINJ, Srednja strukovna bana J. Jelačića	SPL_Sinj_Struk	OTHER	1998-08-28	2017-02-09	18.4531	18-20	KARLOVAC	KARLOVAC	3	NO	NO	NEITHER	168.4
Split-Dalmacija	SINJ, Srednja strukovna bana J. Jelačića	SPL_Sinj_Struk	OTHER	1998-08-25	2017-02-09	18.4613	18-20	KARLOVAC	KARLOVAC	3	NO	NO	NEITHER	166
Split-Dalmacija	SINJ, Srednja strukovna bana J. Jelačića	SPL_Sinj_Struk	OTHER	1998-08-05	2017-02-09	18.5161	18-20	KARLOVAC	KARLOVAC	3	NO	NO	NEITHER	163.6
Split-Dalmacija	SINJ, Srednja strukovna bana J. Jelačića	SPL_Sinj_Struk	OTHER	1998-08-04	2017-02-09	18.5188	18-20	KARLOVAC	KARLOVAC	3	NO	YES	ONE PARENT	163.7
Split-Dalmacija	SINJ, Srednja strukovna bana J. Jelačića	SPL_Sinj_Struk	OTHER	1998-11-09	2017-02-09	18.2533	18-20	MEDULIN	ISTRA	1	NO	NO	NEITHER	163.7
Split-Dalmacija	SINJ, Srednja strukovna bana J. Jelačića	SPL_Sinj_Struk	OTHER	1999-05-01	2017-02-09	17.7796	17	NEUM	DUBROVNIK-NERETVA	1	NO	NO	NEITHER	167.8
Split-Dalmacija	SINJ, Srednja strukovna bana J. Jelačića	SPL_Sinj_Struk	OTHER	1998-07-31	2017-02-09	18.5298	18-20	OGULIN	KARLOVAC	2	NO	NO	NEITHER	165.6
Split-Dalmacija	SINJ, Srednja strukovna bana J. Jelačića	SPL_Sinj_Struk	OTHER	1999-04-12	2017-02-09	17.8316	17	OPUZEN	DUBROVNIK-NERETVA	1	NO	YES	ONE PARENT	169.8
Split-Dalmacija	SINJ, Srednja strukovna bana J. Jelačića	SPL_Sinj_Struk	OTHER	1998-09-10	2017-02-09	18.4175	18-20	OZALJ	KARLOVAC	1	NO	NO	NEITHER	165.1	87.8	161.3	53.1799	97.6984
Split-Dalmacija	SINJ, Srednja strukovna bana J. Jelačića	SPL_Sinj_Struk	OTHER	1998-08-14	2017-02-09	18.4914	18-20	OZALJ	KARLOVAC	1	NO	NO	NEITHER	165.1
Split-Dalmacija	SINJ, Srednja strukovna bana J. Jelačića	SPL_Sinj_Struk	OTHER	1998-07-13	2017-02-09	18.5791	18-20	POTOK TOUNSKI	KARLOVAC	1	NO	NO	NEITHER	172.1
Split-Dalmacija	SINJ, Srednja strukovna bana J. Jelačića	SPL_Sinj_Struk	OTHER	1999-01-13	2017-02-09	18.0753	18-20	PULA	ISTRA	3	NO	NO	NEITHER	169.6
Split-Dalmacija	SINJ, Srednja strukovna bana J. Jelačića	SPL_Sinj_Struk	OTHER	1998-11-27	2017-02-09	18.204	18-20	PULA	ISTRA	3	NO	YES	ONE PARENT	174.8	91.8	176.5	52.5172	100.973
Split-Dalmacija	SINJ, Srednja strukovna bana J. Jelačića	SPL_Sinj_Struk	OTHER	1998-11-01	2017-02-09	18.2752	18-20	PULA	ISTRA	3	NO	NO	NEITHER	167.1
Split-Dalmacija	SINJ, Srednja strukovna bana J. Jelačića	SPL_Sinj_Struk	OTHER	1998-10-22	2017-02-09	18.3025	18-20	PULA	ISTRA	3	NO	YES	ONE PARENT	172.4
Split-Dalmacija	SINJ, Srednja strukovna bana J. Jelačića	SPL_Sinj_Struk	OTHER	1998-10-22	2017-02-09	18.3025	18-20	PULA	ISTRA	3	NO	NO	NEITHER	177.8
Split-Dalmacija	SINJ, Srednja strukovna bana J. Jelačića	SPL_Sinj_Struk	OTHER	1998-10-17	2017-02-09	18.3162	18-20	PULA	ISTRA	3	NO	NO	NEITHER	177.9
Split-Dalmacija	SINJ, Srednja strukovna bana J. Jelačića	SPL_Sinj_Struk	OTHER	1998-07-13	2017-02-09	18.5791	18-20	REČICA	KARLOVAC	1	NO	NO	NEITHER	168.6
Split-Dalmacija	SINJ, Srednja strukovna bana J. Jelačića	SPL_Sinj_Struk	OTHER	1998-05-21	2017-02-09	18.7242	18-20	ŠVICA	LIKA-SENJ	1	NO	NO	NEITHER	164.2
Split-Dalmacija	SINJ, Srednja strukovna bana J. Jelačića	SPL_Sinj_Struk	OTHER	1998-07-29	2017-02-09	18.5352	18-20	TURANJ	KARLOVAC	1	NO	NO	NEITHER	172.5
Split-Dalmacija	SINJ, Srednja strukovna bana J. Jelačića	SPL_Sinj_Struk	OTHER	1998-09-09	2017-02-09	18.4203	18-20	VOJNIĆ	KARLOVAC	1	NO	NO	NEITHER	157.3	80.3	160	51.049	101.716
Split-Dalmacija	SINJ, Srednja strukovna bana J. Jelačića	SPL_Sinj_Struk	OTHER	1998-07-12	2017-02-09	18.5818	18-20	VOJNIĆ	KARLOVAC	1	NO	NO	NEITHER	175.7
Split-Dalmacija	SINJ, Srednja strukovna bana J. Jelačića	SPL_Sinj_Struk	OTHER	1998-10-12	2017-02-09	18.3299	18-20	VRSAR	ISTRA	1	NO	NO	NEITHER	175.5
Split-Dalmacija	SINJ, Srednja strukovna bana J. Jelačića	SPL_Sinj_Struk	OTHER	1998-08-12	2017-02-09	18.4969	18-20	VUKODOL	PRIMORJE-GORSKI KOTAR	1	NO	YES	ONE PARENT	165.5
Split-Dalmacija	SINJ, Srednja strukovna bana J. Jelačića	SPL_Sinj_Struk	OTHER	1998-02-11	2017-02-09	18.9952	18-20	SPLIT	SPLIT-DALMACIJA	3	unavailable	unavailable	unavailable	172.2
Split-Dalmacija	SINJ, Srednja strukovna bana J. Jelačića	SPL_Sinj_Struk	OTHER	1998-08-29	2017-02-09	18.4504	18-20	KARLOVAC	KARLOVAC	3	YES	YES	BOTH PARENTS	155.6
Split-Dalmacija	SINJ, Srednja strukovna bana J. Jelačića	SPL_Sinj_Struk	OTHER	1998-08-27	2017-02-09	18.4559	18-20	KARLOVAC	KARLOVAC	3	YES	YES	BOTH PARENTS	178.6
Split-Dalmacija	SINJ, Srednja strukovna bana J. Jelačića	SPL_Sinj_Struk	OTHER	1998-08-19	2017-02-09	18.4778	18-20	KARLOVAC	KARLOVAC	3	YES	YES	BOTH PARENTS	170.8
Split-Dalmacija	SINJ, Srednja strukovna bana J. Jelačića	SPL_Sinj_Struk	OTHER	1998-07-09	2017-02-09	18.59	18-20	KARLOVAC	KARLOVAC	3	YES	YES	BOTH PARENTS	166.9	94.1	167.2	56.3811	100.18
Split-Dalmacija	SINJ, Srednja strukovna bana J. Jelačića	SPL_Sinj_Struk	OTHER	1998-07-02	2017-02-09	18.6092	18-20	LIPOV PESAK	KARLOVAC	1	YES	NO	ONE PARENT	165.4	86.2	168.5	52.1161	101.874
Split-Dalmacija	SINJ, Srednja strukovna bana J. Jelačića	SPL_Sinj_Struk	OTHER	1998-12-12	2017-02-09	18.1629	18-20	PULA	ISTRA	3	YES	YES	BOTH PARENTS	170.1
Split-Dalmacija	SINJ, Srednja strukovna bana J. Jelačića	SPL_Sinj_Struk	OTHER	1998-05-06	2017-02-09	18.7652	18-20	RUNOVIĆI	SPLIT-DALMACIJA	1	YES	YES	BOTH PARENTS	179.6
Split-Dalmacija	SINJ, Srednja strukovna bana J. Jelačića	SPL_Sinj_Struk	OTHER	1998-11-15	2017-02-09	18.2368	18-20	VALBANDON	ISTRA	1	YES	NO	ONE PARENT	168	87.5	169.1	52.0833	100.655
Split-Dalmacija	SINJ, Srednja strukovna bana J. Jelačića	SPL_Sinj_Struk	OTHER	1998-11-13	2017-02-09	18.2423	18-20	VALTURA	ISTRA	1	YES	NO	ONE PARENT	162.1	87.8	158.6	54.1641	97.8408
Split-Dalmacija	SINJ, Tehnička i industrijska R. Boškovića	SPL_Sinj_Teh	OTHER	1999-03-23	2017-02-09	17.8864	17	OPUZEN	DUBROVNIK-NERETVA	1	NO	NO	NEITHER	172.8
Split-Dalmacija	SINJ, Tehnička i industrijska R. Boškovića	SPL_Sinj_Teh	OTHER	1999-02-02	2017-02-09	18.0205	18-20	PULA	ISTRA	3	NO	NO	NEITHER	164	86	164.2	52.439	100.122
Split-Dalmacija	SINJ, Tehnička i industrijska R. Boškovića	SPL_Sinj_Teh	OTHER	1999-01-31	2017-02-09	18.026	18-20	PULA	ISTRA	3	NO	YES	ONE PARENT	168.8	92	169.5	54.5024	100.415
Split-Dalmacija	SINJ, Tehnička i industrijska R. Boškovića	SPL_Sinj_Teh	OTHER	1999-01-30	2017-02-09	18.0287	18-20	PULA	ISTRA	3	NO	YES	ONE PARENT	169.3	91.7	164.8	54.1642	97.342
Split-Dalmacija	SINJ, Tehnička i industrijska R. Boškovića	SPL_Sinj_Teh	OTHER	1998-12-19	2017-02-09	18.1437	18-20	PULA	ISTRA	3	NO	NO	NEITHER	162.5
Split-Dalmacija	SINJ, Tehnička i industrijska R. Boškovića	SPL_Sinj_Teh	OTHER	1998-11-21	2017-02-09	18.2204	18-20	PULA	ISTRA	3	NO	NO	NEITHER	177.1	92.9	172	52.4562	97.1203
Split-Dalmacija	SINJ, Tehnička i industrijska R. Boškovića	SPL_Sinj_Teh	OTHER	1998-06-29	2017-02-09	18.6174	18-20	GOMINJE	PRIMORJE-GORSKI KOTAR	1	YES	NO	ONE PARENT	161.7
Split-Dalmacija	SINJ, Tehnička i industrijska R. Boškovića	SPL_Sinj_Teh	OTHER	1998-12-13	2017-02-09	18.1602	18-20	PULA	ISTRA	3	YES	YES	BOTH PARENTS	174.2
Split-Dalmacija	SPLIT, Zdravstvena	SPL_Spl_Zdrav	OTHER	1998-08-12	2017-02-09	18.4969	18-20	BARILOVIĆ	KARLOVAC	1	NO	NO	NEITHER	173.3
Split-Dalmacija	SPLIT, Zdravstvena	SPL_Spl_Zdrav	OTHER	1999-03-21	2017-02-09	17.8919	17	CETINIĆI	ISTRA	1	NO	NO	NEITHER	171	89	173.2	52.0468	101.287
Split-Dalmacija	SPLIT, Zdravstvena	SPL_Spl_Zdrav	OTHER	1997-05-20	2017-02-09	19.7262	18-20	DERINGAJ	ZADAR	1	NO	NO	NEITHER	166
Split-Dalmacija	SPLIT, Zdravstvena	SPL_Spl_Zdrav	OTHER	1997-05-05	2017-02-09	19.7673	18-20	GRAČAC	ZADAR	1	NO	NO	NEITHER	162.7
Split-Dalmacija	SPLIT, Zdravstvena	SPL_Spl_Zdrav	OTHER	1997-05-04	2017-02-09	19.77	18-20	GRAČAC	ZADAR	1	NO	NO	NEITHER	165.7
Split-Dalmacija	SPLIT, Zdravstvena	SPL_Spl_Zdrav	OTHER	1996-09-30	2017-02-09	20.3614	18-20	GRAČAC	ZADAR	1	NO	NO	NEITHER	182.3
Split-Dalmacija	SPLIT, Zdravstvena	SPL_Spl_Zdrav	OTHER	1998-05-31	2017-02-09	18.6968	18-20	HRVATSKO POLJE	LIKA-SENJ	1	NO	NO	NEITHER	168.5
Split-Dalmacija	SPLIT, Zdravstvena	SPL_Spl_Zdrav	OTHER	1998-05-12	2017-02-09	18.7488	18-20	IMOTSKI	SPLIT-DALMACIJA	2	NO	NO	NEITHER	175
Split-Dalmacija	SPLIT, Zdravstvena	SPL_Spl_Zdrav	OTHER	1998-09-22	2017-02-09	18.3847	18-20	KARLOVAC	KARLOVAC	3	NO	NO	NEITHER	164.5	87.9	164.6	53.4347	100.061
Split-Dalmacija	SPLIT, Zdravstvena	SPL_Spl_Zdrav	OTHER	1998-09-21	2017-02-09	18.3874	18-20	KARLOVAC	KARLOVAC	3	NO	NO	NEITHER	165.4	88.8	156.3	53.688	94.4982
Split-Dalmacija	SPLIT, Zdravstvena	SPL_Spl_Zdrav	OTHER	1998-09-14	2017-02-09	18.4066	18-20	KARLOVAC	KARLOVAC	3	NO	NO	NEITHER	160.4	88.5	159.7	55.1746	99.5636
Split-Dalmacija	SPLIT, Zdravstvena	SPL_Spl_Zdrav	OTHER	1998-08-17	2017-02-09	18.4832	18-20	KARLOVAC	KARLOVAC	3	NO	NO	NEITHER	172
Split-Dalmacija	SPLIT, Zdravstvena	SPL_Spl_Zdrav	OTHER	1998-08-03	2017-02-09	18.5216	18-20	KARLOVAC	KARLOVAC	3	NO	NO	NEITHER	167.4
Split-Dalmacija	SPLIT, Zdravstvena	SPL_Spl_Zdrav	OTHER	1998-07-18	2017-02-09	18.5654	18-20	KARLOVAC	KARLOVAC	3	NO	NO	NEITHER	164.2
Split-Dalmacija	SPLIT, Zdravstvena	SPL_Spl_Zdrav	OTHER	1998-07-15	2017-02-09	18.5736	18-20	KARLOVAC	KARLOVAC	3	NO	NO	NEITHER	169.3
Split-Dalmacija	SPLIT, Zdravstvena	SPL_Spl_Zdrav	OTHER	1998-06-03	2017-02-09	18.6886	18-20	KORENICA	LIKA-SENJ	1	NO	NO	NEITHER	167.4
Split-Dalmacija	SPLIT, Zdravstvena	SPL_Spl_Zdrav	OTHER	1998-06-09	2017-02-09	18.6721	18-20	LIČKI OSIK	LIKA-SENJ	1	NO	NO	NEITHER	176
Split-Dalmacija	SPLIT, Zdravstvena	SPL_Spl_Zdrav	OTHER	1998-07-01	2017-02-09	18.6119	18-20	LIPOVAČA	KARLOVAC	1	NO	NO	NEITHER	158.8	87.4	163.4	55.0378	102.897
Split-Dalmacija	SPLIT, Zdravstvena	SPL_Spl_Zdrav	OTHER	1998-06-28	2017-02-09	18.6201	18-20	OGULIN	KARLOVAC	2	NO	NO	NEITHER	170.9
Split-Dalmacija	SPLIT, Zdravstvena	SPL_Spl_Zdrav	OTHER	1998-07-01	2017-02-09	18.6119	18-20	POPOVIĆ BRDO	KARLOVAC	1	NO	NO	NEITHER	165	88	172	53.3333	104.242
Split-Dalmacija	SPLIT, Zdravstvena	SPL_Spl_Zdrav	OTHER	1999-02-13	2017-02-09	17.9904	17	PULA	ISTRA	3	NO	NO	NEITHER	151.6	83.8	150.6	55.277	99.3404
Split-Dalmacija	SPLIT, Zdravstvena	SPL_Spl_Zdrav	OTHER	1999-01-29	2017-02-09	18.0315	18-20	PULA	ISTRA	3	NO	NO	NEITHER	163.4	86.8	168.2	53.1212	102.938
Split-Dalmacija	SPLIT, Zdravstvena	SPL_Spl_Zdrav	OTHER	1998-12-20	2017-02-09	18.141	18-20	PULA	ISTRA	3	NO	NO	NEITHER	155.5
Split-Dalmacija	SPLIT, Zdravstvena	SPL_Spl_Zdrav	OTHER	1998-10-19	2017-02-09	18.3107	18-20	PULA	ISTRA	3	NO	NO	NEITHER	167.6
Split-Dalmacija	SPLIT, Zdravstvena	SPL_Spl_Zdrav	OTHER	1999-01-22	2017-02-09	18.0507	18-20	REBIĆI	ISTRA	1	NO	NO	NEITHER	162.5	84.6	168.9	52.0615	103.938
Split-Dalmacija	SPLIT, Zdravstvena	SPL_Spl_Zdrav	OTHER	1998-05-23	2017-02-09	18.7187	18-20	SINAC	LIKA-SENJ	1	NO	YES	ONE PARENT	169.1
Split-Dalmacija	SPLIT, Zdravstvena	SPL_Spl_Zdrav	OTHER	1997-06-25	2017-02-09	19.6277	18-20	ŠIBENIK	ŠIBENIK-KNIN	3	NO	YES	ONE PARENT	166.4
Split-Dalmacija	SPLIT, Zdravstvena	SPL_Spl_Zdrav	OTHER	1998-07-29	2017-02-09	18.5352	18-20	UDBINJA	KARLOVAC	1	NO	NO	NEITHER	160.1
Split-Dalmacija	SPLIT, Zdravstvena	SPL_Spl_Zdrav	OTHER	1999-03-23	2017-02-09	17.8864	17	VID	DUBROVNIK-NERETVA	1	NO	YES	ONE PARENT	162.6
Split-Dalmacija	SPLIT, Zdravstvena	SPL_Spl_Zdrav	OTHER	1998-11-13	2017-02-09	18.2423	18-20	VODNJAN	ISTRA	1	NO	NO	NEITHER	159.1	81.5	157.2	51.2256	98.8058
Split-Dalmacija	SPLIT, Zdravstvena	SPL_Spl_Zdrav	OTHER	1998-04-08	2017-02-09	18.8419	18-20	HRVACE	SPLIT-DALMACIJA	1	unavailable	unavailable	unavailable	164
Split-Dalmacija	SPLIT, Zdravstvena	SPL_Spl_Zdrav	OTHER	1998-04-07	2017-02-09	18.8446	18-20	KARAKAŠICA	SPLIT-DALMACIJA	1	unavailable	unavailable	unavailable	159.5
Split-Dalmacija	SPLIT, Zdravstvena	SPL_Spl_Zdrav	OTHER	1998-01-02	2017-02-09	19.1047	18-20	PERKOVIČ	ŠIBENIK-KNIN	1	unavailable	unavailable	unavailable	160.1
Split-Dalmacija	SPLIT, Zdravstvena	SPL_Spl_Zdrav	OTHER	1998-03-29	2017-02-09	18.8693	18-20	SINJ	SPLIT-DALMACIJA	2	unavailable	unavailable	unavailable	174.3
Split-Dalmacija	SPLIT, Zdravstvena	SPL_Spl_Zdrav	OTHER	1997-09-11	2017-02-09	19.4141	18-20	ŠIBENIK	ŠIBENIK-KNIN	3	unavailable	unavailable	unavailable	173.3
Split-Dalmacija	SPLIT, Zdravstvena	SPL_Spl_Zdrav	OTHER	1997-08-22	2017-02-09	19.4689	18-20	BRODARICA	ŠIBENIK-KNIN	1	YES	NO	ONE PARENT	179
Split-Dalmacija	SPLIT, Zdravstvena	SPL_Spl_Zdrav	OTHER	1998-10-02	2017-02-09	18.3573	18-20	KARLOVAC	KARLOVAC	3	YES	YES	BOTH PARENTS	167.5	87.6	172.8	52.2985	103.164
Split-Dalmacija	SPLIT, Zdravstvena	SPL_Spl_Zdrav	OTHER	1998-08-20	2017-02-09	18.475	18-20	KARLOVAC	KARLOVAC	3	YES	YES	BOTH PARENTS	160.2
Split-Dalmacija	SPLIT, Zdravstvena	SPL_Spl_Zdrav	OTHER	1998-06-26	2017-02-09	18.6256	18-20	OGULIN	KARLOVAC	2	YES	YES	BOTH PARENTS	162.1
Split-Dalmacija	SPLIT, Zdravstvena	SPL_Spl_Zdrav	OTHER	1999-02-27	2017-02-09	17.9521	17	PULA	ISTRA	3	YES	NO	ONE PARENT	168	92.6	159	55.119	94.6429
Split-Dalmacija	SPLIT, Zdravstvena	SPL_Spl_Zdrav	OTHER	1997-06-12	2017-02-09	19.6632	18-20	VODICE	ŠIBENIK-KNIN	1	YES	YES	BOTH PARENTS	172.4
Šibenik-Knin	ŠIBENIK, Medicinska	SIB_Sib_Med	OTHER	1997-04-28	2017-02-06	19.7782	18-20	GRAČAC	ZADAR	1	NO	NO	NEITHER	175.4
Šibenik-Knin	ŠIBENIK, Medicinska	SIB_Sib_Med	OTHER	1997-04-19	2017-02-06	19.8029	18-20	GRAČAC	ZADAR	1	NO	NO	NEITHER	167.5
Šibenik-Knin	ŠIBENIK, Medicinska	SIB_Sib_Med	OTHER	1997-04-03	2017-02-06	19.8467	18-20	GRAČAC	ZADAR	1	NO	NO	NEITHER	183
Šibenik-Knin	ŠIBENIK, Medicinska	SIB_Sib_Med	OTHER	1997-03-04	2017-02-06	19.9288	18-20	GRAČAC	ZADAR	1	NO	NO	NEITHER	167.1
Šibenik-Knin	ŠIBENIK, Medicinska	SIB_Sib_Med	OTHER	1998-09-07	2017-02-06	18.4175	18-20	OZALJ	KARLOVAC	1	NO	NO	NEITHER	158.6	86.6	159.6	54.6028	100.631
Šibenik-Knin	ŠIBENIK, Medicinska	SIB_Sib_Med	OTHER	1997-07-29	2017-02-06	19.5264	18-20	PRIMOŠTEN	ŠIBENIK-KNIN	1	NO	NO	NEITHER	171.6
Šibenik-Knin	ŠIBENIK, Medicinska	SIB_Sib_Med	OTHER	1998-12-30	2017-02-06	18.1054	18-20	PULA	ISTRA	3	NO	NO	NEITHER	165
Šibenik-Knin	ŠIBENIK, Medicinska	SIB_Sib_Med	OTHER	1997-07-28	2017-02-06	19.5291	18-20	ROGOZNICA	ŠIBENIK-KNIN	1	NO	NO	NEITHER	167.1
Šibenik-Knin	ŠIBENIK, Medicinska	SIB_Sib_Med	OTHER	1997-07-25	2017-02-06	19.5373	18-20	ROGOZNICA	ŠIBENIK-KNIN	1	NO	NO	NEITHER	161.5
Šibenik-Knin	ŠIBENIK, Medicinska	SIB_Sib_Med	OTHER	1998-05-30	2017-02-06	18.6913	18-20	SELIŠTE DREŽNIČKO	KARLOVAC	1	NO	NO	NEITHER	153.6
Šibenik-Knin	ŠIBENIK, Medicinska	SIB_Sib_Med	OTHER	1997-07-15	2017-02-06	19.5647	18-20	ŠIBENIK	ŠIBENIK-KNIN	3	NO	NO	NEITHER	166.5
Šibenik-Knin	ŠIBENIK, Medicinska	SIB_Sib_Med	OTHER	1997-06-21	2017-02-06	19.6304	18-20	ŠIBENIK	ŠIBENIK-KNIN	3	NO	YES	ONE PARENT	164
Šibenik-Knin	ŠIBENIK, Medicinska	SIB_Sib_Med	OTHER	1997-06-07	2017-02-06	19.6687	18-20	VODICE	ŠIBENIK-KNIN	1	NO	NO	NEITHER	168.9
Šibenik-Knin	ŠIBENIK, Medicinska	SIB_Sib_Med	OTHER	1997-05-22	2017-02-06	19.7125	18-20	VODICE	ŠIBENIK-KNIN	1	NO	NO	NEITHER	164.7
Šibenik-Knin	ŠIBENIK, Medicinska	SIB_Sib_Med	OTHER	1998-09-06	2017-02-06	18.4203	18-20	VOJNIĆ	KARLOVAC	1	NO	NO	NEITHER	167.6	88.6	170	52.864	101.432
Šibenik-Knin	ŠIBENIK, Medicinska	SIB_Sib_Med	OTHER	1998-01-24	2017-02-06	19.0363	18-20	BORAJA	ŠIBENIK-KNIN	1	unavailable	unavailable	unavailable	169
Šibenik-Knin	ŠIBENIK, Medicinska	SIB_Sib_Med	OTHER	1998-01-21	2017-02-06	19.0445	18-20	DRNIŠ	ŠIBENIK-KNIN	1	unavailable	unavailable	unavailable	168.5
Šibenik-Knin	ŠIBENIK, Medicinska	SIB_Sib_Med	OTHER	1998-01-16	2017-02-06	19.0582	18-20	KNIN	ŠIBENIK-KNIN	2	unavailable	unavailable	unavailable	166.8
Šibenik-Knin	ŠIBENIK, Medicinska	SIB_Sib_Med	OTHER	1998-01-09	2017-02-06	19.0773	18-20	KNIN	ŠIBENIK-KNIN	2	unavailable	unavailable	unavailable	166.3
Šibenik-Knin	ŠIBENIK, Medicinska	SIB_Sib_Med	OTHER	1998-01-05	2017-02-06	19.0883	18-20	KNIN	ŠIBENIK-KNIN	2	unavailable	unavailable	unavailable	164.5
Šibenik-Knin	ŠIBENIK, Medicinska	SIB_Sib_Med	OTHER	1998-01-05	2017-02-06	19.0883	18-20	KNIN	ŠIBENIK-KNIN	2	unavailable	unavailable	unavailable	159.2
Šibenik-Knin	ŠIBENIK, Medicinska	SIB_Sib_Med	OTHER	1998-01-04	2017-02-06	19.091	18-20	KNIN	ŠIBENIK-KNIN	2	unavailable	unavailable	unavailable	173.5
Šibenik-Knin	ŠIBENIK, Medicinska	SIB_Sib_Med	OTHER	1998-04-04	2017-02-06	18.8446	18-20	KOŠUTE	SPLIT-DALMACIJA	1	unavailable	unavailable	unavailable	166.5
Šibenik-Knin	ŠIBENIK, Medicinska	SIB_Sib_Med	OTHER	1997-12-29	2017-02-06	19.1075	18-20	PERKOVIČ	ŠIBENIK-KNIN	1	unavailable	unavailable	unavailable	172.4
Šibenik-Knin	ŠIBENIK, Medicinska	SIB_Sib_Med	OTHER	1997-09-26	2017-02-06	19.3648	18-20	ROGOZNICA	ŠIBENIK-KNIN	1	unavailable	unavailable	unavailable	161.8
Šibenik-Knin	ŠIBENIK, Medicinska	SIB_Sib_Med	OTHER	1998-02-12	2017-02-06	18.9843	18-20	SINJ	SPLIT-DALMACIJA	2	unavailable	unavailable	unavailable	165.5
Šibenik-Knin	ŠIBENIK, Medicinska	SIB_Sib_Med	OTHER	1997-12-23	2017-02-06	19.1239	18-20	ŠIBENIK	ŠIBENIK-KNIN	3	unavailable	unavailable	unavailable	156.7
Šibenik-Knin	ŠIBENIK, Medicinska	SIB_Sib_Med	OTHER	1997-11-28	2017-02-06	19.1923	18-20	ŠIBENIK	ŠIBENIK-KNIN	3	unavailable	unavailable	unavailable	171.5
Šibenik-Knin	ŠIBENIK, Medicinska	SIB_Sib_Med	OTHER	1997-11-23	2017-02-06	19.206	18-20	ŠIBENIK	ŠIBENIK-KNIN	3	unavailable	unavailable	unavailable	156
Šibenik-Knin	ŠIBENIK, Medicinska	SIB_Sib_Med	OTHER	1997-10-20	2017-02-06	19.2991	18-20	ŠIBENIK	ŠIBENIK-KNIN	3	unavailable	unavailable	unavailable	163.9
Šibenik-Knin	ŠIBENIK, Medicinska	SIB_Sib_Med	OTHER	1997-10-04	2017-02-06	19.3429	18-20	ŠIBENIK	ŠIBENIK-KNIN	3	unavailable	unavailable	unavailable	169.4
Šibenik-Knin	ŠIBENIK, Medicinska	SIB_Sib_Med	OTHER	1997-09-09	2017-02-06	19.4114	18-20	ŠIBENIK	ŠIBENIK-KNIN	3	unavailable	unavailable	unavailable	167.2
Šibenik-Knin	ŠIBENIK, Medicinska	SIB_Sib_Med	OTHER	1998-03-22	2017-02-06	18.8802	18-20	TRILJ	SPLIT-DALMACIJA	1	unavailable	unavailable	unavailable	173
Šibenik-Knin	ŠIBENIK, Medicinska	SIB_Sib_Med	OTHER	1998-03-21	2017-02-06	18.883	18-20	TRILJ	SPLIT-DALMACIJA	1	unavailable	unavailable	unavailable	164
Šibenik-Knin	ŠIBENIK, Medicinska	SIB_Sib_Med	OTHER	1998-03-17	2017-02-06	18.8939	18-20	TRILJ	SPLIT-DALMACIJA	1	unavailable	unavailable	unavailable	177.1
Šibenik-Knin	ŠIBENIK, Medicinska	SIB_Sib_Med	OTHER	1998-03-15	2017-02-06	18.8994	18-20	TRILJ	SPLIT-DALMACIJA	1	unavailable	unavailable	unavailable	169.4
Šibenik-Knin	ŠIBENIK, Medicinska	SIB_Sib_Med	OTHER	1997-10-03	2017-02-06	19.3457	18-20	UNEŠIČ	ŠIBENIK-KNIN	1	unavailable	unavailable	unavailable	173
Šibenik-Knin	ŠIBENIK, Medicinska	SIB_Sib_Med	OTHER	1997-09-30	2017-02-06	19.3539	18-20	VODICE	ŠIBENIK-KNIN	1	unavailable	unavailable	unavailable	162
Šibenik-Knin	ŠIBENIK, Medicinska	SIB_Sib_Med	OTHER	1997-08-12	2017-02-06	19.488	18-20	DRNIŠ	ŠIBENIK-KNIN	1	YES	YES	BOTH PARENTS	163.3
Šibenik-Knin	ŠIBENIK, Medicinska	SIB_Sib_Med	OTHER	1998-04-19	2017-02-06	18.8036	18-20	MAKARSKA	SPLIT-DALMACIJA	2	YES	NO	ONE PARENT	172.2
Šibenik-Knin	ŠIBENIK, Medicinska	SIB_Sib_Med	OTHER	1997-08-01	2017-02-06	19.5181	18-20	POKROVNIK	ŠIBENIK-KNIN	1	YES	NO	ONE PARENT	165.3
Šibenik-Knin	ŠIBENIK, Medicinska	SIB_Sib_Med	OTHER	1997-07-02	2017-02-06	19.6003	18-20	ŠIBENIK	ŠIBENIK-KNIN	3	YES	NO	ONE PARENT	158.5
Šibenik-Knin	ŠIBENIK, Medicinska	SIB_Sib_Med	OTHER	1997-06-10	2017-02-06	19.6605	18-20	ŠIBENIK	ŠIBENIK-KNIN	3	YES	NO	ONE PARENT	171
Šibenik-Knin	ŠIBENIK, Srednja strukovna	SIB_Sib_Struk	OTHER	1997-04-30	2017-02-06	19.7728	18-20	GRAČAC	ZADAR	1	NO	NO	NEITHER	165.6
Šibenik-Knin	ŠIBENIK, Srednja strukovna	SIB_Sib_Struk	OTHER	1998-08-29	2017-02-06	18.4422	18-20	KARLOVAC	KARLOVAC	3	NO	NO	NEITHER	169.8
Šibenik-Knin	ŠIBENIK, Srednja strukovna	SIB_Sib_Struk	OTHER	1998-12-02	2017-02-06	18.1821	18-20	PULA	ISTRA	3	NO	NO	NEITHER	161.5
Šibenik-Knin	ŠIBENIK, Srednja strukovna	SIB_Sib_Struk	OTHER	1997-06-21	2017-02-06	19.6304	18-20	ŠIBENIK	ŠIBENIK-KNIN	3	NO	NO	NEITHER	167
Šibenik-Knin	ŠIBENIK, Srednja strukovna	SIB_Sib_Struk	OTHER	1997-09-14	2017-02-06	19.3977	18-20	ŠIBENIK	ŠIBENIK-KNIN	3	unavailable	unavailable	unavailable	168.4
Šibenik-Knin	ŠIBENIK, Srednja strukovna	SIB_Sib_Struk	OTHER	1998-09-11	2017-02-06	18.4066	18-20	KARLOVAC	KARLOVAC	3	YES	NO	ONE PARENT	176.5	91.2	177.9	51.6714	100.793
Šibenik-Knin	ŠIBENIK, Srednja strukovna	SIB_Sib_Struk	OTHER	1998-11-23	2017-02-06	18.2067	18-20	PULA	ISTRA	3	YES	NO	ONE PARENT	170.4	89.2	167.5	52.3474	98.2981
Šibenik-Knin	ŠIBENIK, Srednja strukovna	SIB_Sib_Struk	OTHER	1997-07-08	2017-02-06	19.5838	18-20	ŠIBENIK	ŠIBENIK-KNIN	3	YES	YES	BOTH PARENTS	169
Šibenik-Knin	ŠIBENIK, Turističko-ugostiteljska	SIB_Sib_Tur	OTHER	1999-01-16	2017-02-06	18.0589	18-20	BARBAN	ISTRA	1	NO	NO	NEITHER	161.7
Šibenik-Knin	ŠIBENIK, Turističko-ugostiteljska	SIB_Sib_Tur	OTHER	1999-03-17	2017-02-06	17.8946	17	DIVŠIĆI	ISTRA	1	NO	NO	NEITHER	174.1	95.1	174.8	54.6238	100.402
Šibenik-Knin	ŠIBENIK, Turističko-ugostiteljska	SIB_Sib_Tur	OTHER	1998-08-06	2017-02-06	18.5051	18-20	DONJA TREBINJA	KARLOVAC	1	NO	NO	NEITHER	167.1
Šibenik-Knin	ŠIBENIK, Turističko-ugostiteljska	SIB_Sib_Tur	OTHER	1998-08-06	2017-02-06	18.5051	18-20	DUGA RESA	KARLOVAC	2	NO	NO	NEITHER	164.1
Šibenik-Knin	ŠIBENIK, Turističko-ugostiteljska	SIB_Sib_Tur	OTHER	1998-07-20	2017-02-06	18.5517	18-20	DUGA RESA	KARLOVAC	2	NO	NO	NEITHER	176
Šibenik-Knin	ŠIBENIK, Turističko-ugostiteljska	SIB_Sib_Tur	OTHER	1999-03-13	2017-02-06	17.9055	17	FAŽANA	ISTRA	1	NO	NO	NEITHER	179	93.2	179.1	52.067	100.056
Šibenik-Knin	ŠIBENIK, Turističko-ugostiteljska	SIB_Sib_Tur	OTHER	1998-06-26	2017-02-06	18.6174	18-20	HRELJIN OGULINSKI	KARLOVAC	1	NO	NO	NEITHER	172.3
Šibenik-Knin	ŠIBENIK, Turističko-ugostiteljska	SIB_Sib_Tur	OTHER	1998-10-02	2017-02-06	18.3491	18-20	KARLOVAC	KARLOVAC	3	NO	NO	NEITHER	165	86.1	171.2	52.1818	103.758
Šibenik-Knin	ŠIBENIK, Turističko-ugostiteljska	SIB_Sib_Tur	OTHER	1998-06-24	2017-02-06	18.6229	18-20	OGULIN	KARLOVAC	2	NO	NO	NEITHER	172.6
Šibenik-Knin	ŠIBENIK, Turističko-ugostiteljska	SIB_Sib_Tur	OTHER	1998-06-13	2017-02-06	18.653	18-20	OGULIN	KARLOVAC	2	NO	NO	NEITHER	164.8
Šibenik-Knin	ŠIBENIK, Turističko-ugostiteljska	SIB_Sib_Tur	OTHER	1999-02-23	2017-02-06	17.9548	17	PULA	ISTRA	3	NO	NO	NEITHER	161	87.6	159.2	54.4099	98.882
Šibenik-Knin	ŠIBENIK, Turističko-ugostiteljska	SIB_Sib_Tur	OTHER	1999-02-12	2017-02-06	17.9849	17	PULA	ISTRA	3	NO	YES	ONE PARENT	180.1	94.2	178	52.3043	98.834
Šibenik-Knin	ŠIBENIK, Turističko-ugostiteljska	SIB_Sib_Tur	OTHER	1999-02-07	2017-02-06	17.9986	18-20	PULA	ISTRA	3	NO	YES	ONE PARENT	156	83.3	154.5	53.3974	99.0385
Šibenik-Knin	ŠIBENIK, Turističko-ugostiteljska	SIB_Sib_Tur	OTHER	1998-12-16	2017-02-06	18.1437	18-20	PULA	ISTRA	3	NO	NO	NEITHER	167.5
Šibenik-Knin	ŠIBENIK, Turističko-ugostiteljska	SIB_Sib_Tur	OTHER	1998-11-02	2017-02-06	18.2642	18-20	PULA	ISTRA	3	NO	NO	NEITHER	159.4
Šibenik-Knin	ŠIBENIK, Turističko-ugostiteljska	SIB_Sib_Tur	OTHER	1998-07-07	2017-02-06	18.5873	18-20	RIJEKA	PRIMORJE-GORSKI KOTAR	3	NO	NO	NEITHER	170.1	90.5	171.1	53.204	100.588
Šibenik-Knin	ŠIBENIK, Turističko-ugostiteljska	SIB_Sib_Tur	OTHER	1998-04-06	2017-02-06	18.8392	18-20	GLJEV	SPLIT-DALMACIJA	1	unavailable	unavailable	unavailable	179
Šibenik-Knin	ŠIBENIK, Turističko-ugostiteljska	SIB_Sib_Tur	OTHER	1998-02-10	2017-02-06	18.9897	18-20	SOLIN	SPLIT-DALMACIJA	2	unavailable	unavailable	unavailable	178.7
Šibenik-Knin	ŠIBENIK, Turističko-ugostiteljska	SIB_Sib_Tur	OTHER	1998-04-27	2017-02-06	18.7817	18-20	KAMENMOST	SPLIT-DALMACIJA	1	YES	NO	ONE PARENT	170.5
Šibenik-Knin	ŠIBENIK, Turističko-ugostiteljska	SIB_Sib_Tur	OTHER	1999-03-04	2017-02-06	17.9302	17	PREMANTURA	ISTRA	1	YES	YES	BOTH PARENTS	173.7	91.5	178.2	52.677	102.591
Šibenik-Knin	ŠIBENIK, Turističko-ugostiteljska	SIB_Sib_Tur	OTHER	1999-02-15	2017-02-06	17.9767	17	PULA	ISTRA	3	YES	NO	ONE PARENT	178	92.4	175.7	51.9101	98.7079
Šibenik-Knin	ŠIBENIK, Turističko-ugostiteljska	SIB_Sib_Tur	OTHER	1999-01-27	2017-02-06	18.0287	18-20	PULA	ISTRA	3	YES	YES	BOTH PARENTS	174.7	95.7	174.7	54.7796	100
Šibenik-Knin	ŠIBENIK, Turističko-ugostiteljska	SIB_Sib_Tur	OTHER	1999-01-10	2017-02-06	18.0753	18-20	PULA	ISTRA	3	YES	YES	BOTH PARENTS	166
Zadar	GRAČAC, Srednja škola	ZAD_Gra_Sred	MIXED	1999-05-16	2017-04-04	17.8864	17	BARBAN	ISTRA	1	NO	NO	NEITHER	168.5	92	167.2	54.5994	99.2285
Zadar	GRAČAC, Srednja škola	ZAD_Gra_Sred	MIXED	1998-10-30	2017-04-04	18.4285	18-20	GENERALSKI STOL	KARLOVAC	1	NO	NO	NEITHER	174
Zadar	GRAČAC, Srednja škola	ZAD_Gra_Sred	MIXED	1998-11-22	2017-04-04	18.3655	18-20	KARLOVAC	KARLOVAC	3	NO	YES	ONE PARENT	178.8	90.5	176.7	50.6152	98.8255
Zadar	GRAČAC, Srednja škola	ZAD_Gra_Sred	MIXED	1998-07-24	2017-04-04	18.6968	18-20	KRASNO	LIKA-SENJ	1	NO	NO	NEITHER	160.3
Zadar	GRAČAC, Srednja škola	ZAD_Gra_Sred	MIXED	1999-12-21	2017-04-04	17.2868	17	METKOVIĆ	DUBROVNIK-NERETVA	2	NO	NO	NEITHER	172.9
Zadar	GRAČAC, Srednja škola	ZAD_Gra_Sred	MIXED	1998-08-14	2017-04-04	18.6393	18-20	OGULIN	KARLOVAC	2	NO	NO	NEITHER	167.7
Zadar	GRAČAC, Srednja škola	ZAD_Gra_Sred	MIXED	1999-05-29	2017-04-04	17.8508	17	OPUZEN	DUBROVNIK-NERETVA	1	NO	NO	NEITHER	171
Zadar	GRAČAC, Srednja škola	ZAD_Gra_Sred	MIXED	1998-07-21	2017-04-04	18.705	18-20	OTOČAC	LIKA-SENJ	1	NO	NO	NEITHER	171.4
Zadar	GRAČAC, Srednja škola	ZAD_Gra_Sred	MIXED	1999-04-21	2017-04-04	17.9548	17	PULA	ISTRA	3	NO	NO	NEITHER	164	89.3	155	54.4512	94.5122
Zadar	GRAČAC, Srednja škola	ZAD_Gra_Sred	MIXED	1999-03-30	2017-04-04	18.0151	18-20	PULA	ISTRA	3	NO	NO	NEITHER	164.4	88.5	163.2	53.8321	99.2701
Zadar	GRAČAC, Srednja škola	ZAD_Gra_Sred	MIXED	1998-09-21	2017-04-04	18.5352	18-20	VOJNIĆ	KARLOVAC	1	NO	NO	NEITHER	162.2
Zadar	GRAČAC, Srednja škola	ZAD_Gra_Sred	MIXED	1998-06-03	2017-04-04	18.8364	18-20	GLAVICE	SPLIT-DALMACIJA	1	unavailable	unavailable	unavailable	162.7
Zadar	GRAČAC, Srednja škola	ZAD_Gra_Sred	MIXED	1998-03-10	2017-04-04	19.0691	18-20	KNIN	ŠIBENIK-KNIN	2	unavailable	unavailable	unavailable	173.5
Zadar	GRAČAC, Srednja škola	ZAD_Gra_Sred	MIXED	1998-03-25	2017-04-04	19.0281	18-20	TROGIR	SPLIT-DALMACIJA	2	unavailable	unavailable	unavailable	172.6
Zadar	GRAČAC, Srednja škola	ZAD_Gra_Sred	MIXED	1998-08-27	2017-04-04	18.6037	18-20	KARLOVAC	KARLOVAC	3	YES	YES	BOTH PARENTS	167	88.1	170.2	52.7545	101.916
Zadar	GRAČAC, Srednja škola	ZAD_Gra_Sred	MIXED	1999-06-23	2017-04-04	17.7823	17	NEUM	DUBROVNIK-NERETVA	1	YES	NO	ONE PARENT	167.8
Zadar	GRAČAC, Srednja škola	ZAD_Gra_Sred	MIXED	1998-08-24	2017-04-04	18.6119	18-20	PRIBIĆ	KARLOVAC	1	YES	YES	BOTH PARENTS	158.6	87.3	158.5	55.0441	99.9369
Zadar	GRAČAC, Srednja škola	ZAD_Gra_Sred	MIXED	1999-03-02	2017-04-04	18.0917	18-20	PULA	ISTRA	3	YES	YES	BOTH PARENTS	169.3
Zadar	GRAČAC, Srednja škola	ZAD_Gra_Sred	MIXED	1999-02-11	2017-04-04	18.1437	18-20	PULA	ISTRA	3	YES	NO	ONE PARENT	167

## Sheet: 3_BOYS (other regions)
Region of the school (Županija)	School	Date of birth	Date of the measurement	Age (years)	Age category	Place of residence	Country/region of residence	University education of parents			Anthropometry
								Father	Mother	Both parents total	Body height (cm)	Sitting height (cm)	Arm span (cm)	Relative sitting height (% body height)	Relative arm span (% body height)
Dubrovnik-Neretva	METKOVIČ, Gimnazija	1997-11-01	2015-10-15	17.9521	17	GVOZD	SISAK-MOSLAVINA	NO	NO	NEITHER	187
Karlovac	KARLOVAC, Gimnazija	2000-03-28	2017-04-03	17.0157	17	ČELJEVO	Bosnia and Herzegovina	NO	NO	NEITHER	180.3
Karlovac	KARLOVAC, Medicinska	1999-03-18	2017-04-03	18.0452	18-20	KUTINA	SISAK-MOSLAVINA	YES	YES	BOTH	182.9	95.6	181.7	52.269	99.3439
Karlovac	KARLOVAC, Medicinska	1998-01-05	2017-04-03	19.2416	18-20	DRINOVCI	Bosnia and Herzegovina	NO	NO	NEITHER	182.2
Karlovac	KARLOVAC, Medicinska	1997-11-07	2017-04-03	19.4031	18-20	DRINOVCI	Bosnia and Herzegovina	NO	NO	NEITHER	182
Karlovac	KARLOVAC, Prirodoslovna	1999-02-06	2017-04-07	18.1656	18-20	BJELOVAR	BJELOVAR-BILOGORA	NO	NO	NEITHER	166.3
Karlovac	KARLOVAC, Šumarska i drvodjeljska	1998-12-04	2017-04-07	18.3409	18-20	DAVOR	BROD-POSAVINA	NO	NO	NEITHER	184.7
Karlovac	KARLOVAC, Šumarska i drvodjeljska	1998-11-19	2017-04-07	18.3819	18-20	DRENOVA	ZAGREB	NO	YES	ONE	175.4
Karlovac	KARLOVAC, Tehnička škola	1998-11-13	2017-04-07	18.3984	18-20	MOŠĆENICA	SISAK-MOSLAVINA	NO	YES	ONE	180.2
Primorje-Gorski Kotar	BAKAR, Pomorska	1998-02-12	2016-04-18	18.1793	18-20	ŠANDROVAC	BJELOVAR-BILOGORA	NO	NO	NEITHER	178.8
Primorje-Gorski Kotar	BAKAR, Pomorska	1997-07-12	2016-04-18	18.768	18-20	BODLJEVINA	POŽEGA-SLAVONIJA	NO	NO	NEITHER	189.4
Primorje-Gorski Kotar	BAKAR, Pomorska	1997-06-07	2016-04-18	18.8638	18-20	OSIJEK	OSIJEK-BARANJA	NO	NO	NEITHER	182.7
Primorje-Gorski Kotar	BAKAR, Pomorska	1997-04-12	2016-04-18	19.0171	18-20	GORICA	Bosnia and Herzegovina	NO	NO	NEITHER	189.4
Primorje-Gorski Kotar	RIJEKA, Građevinska tehnička	1997-05-31	2016-04-18	18.883	18-20	TIHALJINA	Bosnia and Herzegovina	NO	NO	NEITHER	176.5
Primorje-Gorski Kotar	RIJEKA, Prirodoslovno-grafička	1998-03-05	2016-04-18	18.1218	18-20	VUKŠIN ŠIPAK	ZAGREB	NO	NO	NEITHER	186.5	95.2	186.5	51.0456	100
Primorje-Gorski Kotar	RIJEKA, Prirodoslovno-grafička	1996-10-13	2016-04-18	19.5127	18-20	VINKOVCI	VUKOVAR-SRIJEM	NO	NO	NEITHER	167.4
Primorje-Gorski Kotar	RIJEKA, Prva riječka hrvatska gimnazija	1997-04-21	2016-04-18	18.9925	18-20	DRINOVCI	Bosnia and Herzegovina	NO	NO	NEITHER	190.2
Split-Dalmacija	IMOTSKI, Gimnazija dr. M. Ujevića & Ekonomska škola	1998-01-15	2016-02-29	18.1218	18-20	LIPOVLJANI	SISAK-MOSLAVINA	NO	NO	NEITHER	175.3
Split-Dalmacija	IMOTSKI, Gimnazija dr. M. Ujevića & Ekonomska škola	1997-02-10	2016-02-29	19.05	18-20	POCRTE	Bosnia and Herzegovina	NO	NO	NEITHER	187.7
Split-Dalmacija	IMOTSKI, Obrtničko-industrijska	1999-10-27	2017-05-10	17.5359	17	BRLENIĆ	ZAGREB	NO	NO	NEITHER	174.6
Split-Dalmacija	IMOTSKI, Obrtničko-industrijska	1999-09-12	2017-05-10	17.6591	17	ČREMUŠNICA	SISAK-MOSLAVINA	NO	NO	NEITHER	177.6
Split-Dalmacija	IMOTSKI, Obrtničko-industrijska	1999-06-30	2017-05-10	17.8617	17	GORNJI VIDUŠEVAC	SISAK-MOSLAVINA	NO	YES	ONE	177
Split-Dalmacija	IMOTSKI, Obrtničko-industrijska	1999-05-11	2017-05-10	17.9986	18-20	LIPIK	POŽEGA-SLAVONIJA	NO	NO	NEITHER	180	99.6	173.6	55.3333	96.4444
Split-Dalmacija	SPLIT, Pomorska škola	1998-07-31	2016-06-01	17.8371	17	???	SISAK-MOSLAVINA	NO	NO	NEITHER	181
								0	0	0

## Sheet: 4_GIRLS (other regions)
Region of the school (Županija)	School	Date of birth	Date of the measurement	Age (years)	Age category	Place of residence	Country/region of residence	University education of parents			Anthropometry
								Father	Mother	Both parents total	Body height (cm)	Sitting height (cm)	Arm span (cm)	Relative sitting height (% body height)	Relative arm span (% body height)
Dubrovnik-Neretva	METKOVIĆ, Gimnazija	31.08.1998	2017-02-06	18.4367	18-20	GABELA POLJE	Bosnia and Herzegovina	NO	NO	NEITHER	165.6
Karlovac	KARLOVAC, Ekonomsko-turistička	1997-10-23	2017-04-07	19.4552	18-20	KUPČINA ŽUMBERAČKA	ZAGREB	NO	NO	NEITHER	164.4	87.5	163.5	53.2238	99.4526
Karlovac	KARLOVAC, Gimnazija	1998-04-27	2017-04-03	18.935	18-20	VRGIN MOST	SISAK-MOSLAVINA	NO	NO	NEITHER	163
Karlovac	KARLOVAC, Medicinska	1998-06-11	2017-04-03	18.8118	18-20	VRGINMOST	SISAK-MOSLAVINA	NO	NO	NEITHER	159
Karlovac	KARLOVAC, Prirodoslovna	1997-08-26	2017-04-07	19.614	18-20	DONJA KUPČINA	ZAGREB	NO	NO	NEITHER	158
Karlovac	KARLOVAC, Trgovačko-ugostiteljska	1998-06-03	2017-04-07	18.8446	18-20	JASTREBARSKO	ZAGREB	NO	NO	NEITHER	172.6	89.7	172.8	51.9699	100.116
Split-Dalmacija	IMOTSKI, Gimnazija	1998-11-23	2017-05-16	18.4778	18-20	TIHAJLINA	Bosnia and Herzegovina	NO	NO	NEITHER	172.2
Split-Dalmacija	IMOTSKI, Gimnazija	1998-08-06	2017-05-16	18.7762	18-20	DRINOVCI	Bosnia and Herzegovina	NO	NO	NEITHER	174.4
Split-Dalmacija	IMOTSKI, Gimnazija	1999-01-19	2017-05-16	18.3217	18-20	DRINOVCI	Bosnia and Herzegovina	NO	NO	NEITHER	171
Split-Dalmacija	IMOTSKI, Gimnazija	1998-05-21	2017-05-16	18.987	18-20	ZAGREB	ZAGREB CITY	NO	NO	NEITHER	168.9

## Sheet: 5_BOYS (domestic, Dalmatia)
Region of the school (Županija)	School	School code	School type	Date of birth	Date of measurement	Age (years)	Age category	Place of residence	County of residence	Population size of the place of residence	University education of parents			Anthropometry
										1 (10 000 ≥)
										2 (10 001 - 25 000)
										3 (> 25 000)	Father	Mother	Total university education of both parents	Body height (cm)	Sitting height (cm)	Arm span (cm)	Relative sitting height (% body height)	Relative arm span (% body height)
Dubrovnik-Neretva	DUBROVNIK, Ekonomska i trgovačka	DUB_Dub_Ekon	OTHER	1998-03-22	2016-04-07	18.0452	18-20	DUBROVNIK	DUBROVNIK-NERETVA	3	NO	NO	NEITHER	181
Dubrovnik-Neretva	DUBROVNIK, Ekonomska i trgovačka	DUB_Dub_Ekon	OTHER	1998-02-04	2016-04-07	18.1711	18-20	DUBROVNIK	DUBROVNIK-NERETVA	3	YES	YES	BOTH PARENTS	172.5
Dubrovnik-Neretva	DUBROVNIK, Ekonomska i trgovačka	DUB_Dub_Ekon	OTHER	1997-12-24	2016-04-07	18.2861	18-20	ČIBAČA	DUBROVNIK-NERETVA	1	NO	NO	NEITHER	180.6
Dubrovnik-Neretva	DUBROVNIK, Ekonomska i trgovačka	DUB_Dub_Ekon	OTHER	1997-10-03	2016-04-07	18.5106	18-20	DUBROVNIK	DUBROVNIK-NERETVA	3	NO	YES	ONE PARENT	181.5
Dubrovnik-Neretva	DUBROVNIK, Ekonomska i trgovačka	DUB_Dub_Ekon	OTHER	1997-09-25	2016-04-07	18.5325	18-20	GRUDA	DUBROVNIK-NERETVA	1	NO	NO	NEITHER	192
Dubrovnik-Neretva	DUBROVNIK, Ekonomska i trgovačka	DUB_Dub_Ekon	OTHER	1997-09-11	2016-04-07	18.5708	18-20	ČILIPI	DUBROVNIK-NERETVA	1	NO	YES	ONE PARENT	181.9
Dubrovnik-Neretva	DUBROVNIK, Ekonomska i trgovačka	DUB_Dub_Ekon	OTHER	1997-08-27	2016-04-07	18.6119	18-20	DUBROVNIK	DUBROVNIK-NERETVA	3	NO	NO	NEITHER	187
Dubrovnik-Neretva	DUBROVNIK, Ekonomska i trgovačka	DUB_Dub_Ekon	OTHER	1997-07-20	2016-04-07	18.7159	18-20	DUBROVNIK	DUBROVNIK-NERETVA	3	NO	NO	NEITHER	179.5
Dubrovnik-Neretva	DUBROVNIK, Ekonomska i trgovačka	DUB_Dub_Ekon	OTHER	1997-07-05	2016-04-07	18.757	18-20	DUBROVNIK	DUBROVNIK-NERETVA	3	YES	YES	BOTH PARENTS	177.5
Dubrovnik-Neretva	DUBROVNIK, Ekonomska i trgovačka	DUB_Dub_Ekon	OTHER	1997-06-24	2016-04-07	18.7871	18-20	DUBROVNIK	DUBROVNIK-NERETVA	3	NO	NO	NEITHER	188.2
Dubrovnik-Neretva	DUBROVNIK, Ekonomska i trgovačka	DUB_Dub_Ekon	OTHER	1997-06-14	2016-04-07	18.8145	18-20	MOKOŠICA	DUBROVNIK-NERETVA	1	YES	YES	BOTH PARENTS	179.8
Dubrovnik-Neretva	DUBROVNIK, Ekonomska i trgovačka	DUB_Dub_Ekon	OTHER	1997-04-26	2016-04-07	18.9487	18-20	DUBROVNIK	DUBROVNIK-NERETVA	3	NO	NO	NEITHER	198.1
Dubrovnik-Neretva	DUBROVNIK, Ekonomska i trgovačka	DUB_Dub_Ekon	OTHER	1997-04-19	2016-04-07	18.9678	18-20	DUBROVNIK	DUBROVNIK-NERETVA	3	NO	NO	NEITHER	198.1
Dubrovnik-Neretva	DUBROVNIK, Ekonomska i trgovačka	DUB_Dub_Ekon	OTHER	1997-02-25	2016-04-07	19.1129	18-20	DUBROVNIK	DUBROVNIK-NERETVA	3	NO	NO	NEITHER	175.6
Dubrovnik-Neretva	DUBROVNIK, Ekonomska i trgovačka	DUB_Dub_Ekon	OTHER	1996-03-04	2016-04-07	20.0931	18-20	MOKOŠICA	DUBROVNIK-NERETVA	1	YES	YES	BOTH PARENTS	179.5
Dubrovnik-Neretva	DUBROVNIK, Ekonomska i trgovačka	DUB_Dub_Ekon	OTHER	1998-04-17	2016-04-07	17.974	17	GORICA	ZADAR	1	NO	NO	NEITHER	178.9
Dubrovnik-Neretva	DUBROVNIK, Gimnazija	DUB_Dub_Gim	GIMNAZIJA	1998-04-23	2016-04-07	17.9576	17	DUBROVNIK	DUBROVNIK-NERETVA	3	NO	YES	ONE PARENT	180.4
Dubrovnik-Neretva	DUBROVNIK, Gimnazija	DUB_Dub_Gim	GIMNAZIJA	1998-04-09	2016-04-07	17.9959	18-20	DUBROVNIK	DUBROVNIK-NERETVA	3	NO	NO	NEITHER	188.1
Dubrovnik-Neretva	DUBROVNIK, Gimnazija	DUB_Dub_Gim	GIMNAZIJA	1998-04-04	2016-04-07	18.0096	18-20	DUBROVNIK	DUBROVNIK-NERETVA	3	YES	YES	BOTH PARENTS	176.8
Dubrovnik-Neretva	DUBROVNIK, Gimnazija	DUB_Dub_Gim	GIMNAZIJA	1998-03-25	2016-04-07	18.037	18-20	DUBROVNIK	DUBROVNIK-NERETVA	3	YES	NO	ONE PARENT	188.6
Dubrovnik-Neretva	DUBROVNIK, Gimnazija	DUB_Dub_Gim	GIMNAZIJA	1998-03-15	2016-04-07	18.0643	18-20	DUBROVNIK	DUBROVNIK-NERETVA	3	YES	YES	BOTH PARENTS	185.6
Dubrovnik-Neretva	DUBROVNIK, Gimnazija	DUB_Dub_Gim	GIMNAZIJA	1998-03-03	2016-04-07	18.0972	18-20	DUBROVNIK	DUBROVNIK-NERETVA	3	YES	YES	BOTH PARENTS	180.7
Dubrovnik-Neretva	DUBROVNIK, Gimnazija	DUB_Dub_Gim	GIMNAZIJA	1998-02-07	2016-04-07	18.1629	18-20	DUBROVNIK	DUBROVNIK-NERETVA	3	YES	NO	ONE PARENT	173.3
Dubrovnik-Neretva	DUBROVNIK, Gimnazija	DUB_Dub_Gim	GIMNAZIJA	1998-02-01	2016-04-07	18.1793	18-20	DUBROVNIK	DUBROVNIK-NERETVA	3	NO	YES	ONE PARENT	185.9
Dubrovnik-Neretva	DUBROVNIK, Gimnazija	DUB_Dub_Gim	GIMNAZIJA	1998-01-07	2016-04-07	18.2478	18-20	DUBROVNIK	DUBROVNIK-NERETVA	3	YES	NO	ONE PARENT	179.7
Dubrovnik-Neretva	DUBROVNIK, Gimnazija	DUB_Dub_Gim	GIMNAZIJA	1998-01-07	2016-04-07	18.2478	18-20	DUBROVNIK	DUBROVNIK-NERETVA	3	NO	NO	NEITHER	187.5
Dubrovnik-Neretva	DUBROVNIK, Gimnazija	DUB_Dub_Gim	GIMNAZIJA	1998-01-06	2016-04-07	18.2505	18-20	DUBROVNIK	DUBROVNIK-NERETVA	3	YES	YES	BOTH PARENTS	197.8
Dubrovnik-Neretva	DUBROVNIK, Gimnazija	DUB_Dub_Gim	GIMNAZIJA	1997-12-30	2016-04-07	18.2697	18-20	DUBROVNIK	DUBROVNIK-NERETVA	3	NO	NO	NEITHER	169.5
Dubrovnik-Neretva	DUBROVNIK, Gimnazija	DUB_Dub_Gim	GIMNAZIJA	1997-12-24	2016-04-07	18.2861	18-20	DUBROVNIK	DUBROVNIK-NERETVA	3	YES	NO	ONE PARENT	187
Dubrovnik-Neretva	DUBROVNIK, Gimnazija	DUB_Dub_Gim	GIMNAZIJA	1997-11-30	2016-04-07	18.3518	18-20	DUBROVNIK	DUBROVNIK-NERETVA	3	YES	NO	ONE PARENT	174.7
Dubrovnik-Neretva	DUBROVNIK, Gimnazija	DUB_Dub_Gim	GIMNAZIJA	1997-11-27	2016-04-07	18.36	18-20	DUBROVNIK	DUBROVNIK-NERETVA	3	NO	YES	ONE PARENT	190.7
Dubrovnik-Neretva	DUBROVNIK, Gimnazija	DUB_Dub_Gim	GIMNAZIJA	1997-11-18	2016-04-07	18.3847	18-20	DUBROVNIK	DUBROVNIK-NERETVA	3	NO	NO	NEITHER	188.8
Dubrovnik-Neretva	DUBROVNIK, Gimnazija	DUB_Dub_Gim	GIMNAZIJA	1997-11-02	2016-04-07	18.4285	18-20	DUBROVNIK	DUBROVNIK-NERETVA	3	YES	YES	BOTH PARENTS	182.2
Dubrovnik-Neretva	DUBROVNIK, Gimnazija	DUB_Dub_Gim	GIMNAZIJA	1997-10-31	2016-04-07	18.4339	18-20	DUBROVNIK	DUBROVNIK-NERETVA	3	YES	NO	ONE PARENT	190.5
Dubrovnik-Neretva	DUBROVNIK, Gimnazija	DUB_Dub_Gim	GIMNAZIJA	1997-10-28	2016-04-07	18.4422	18-20	DUBROVNIK	DUBROVNIK-NERETVA	3	NO	NO	NEITHER	188.5
Dubrovnik-Neretva	DUBROVNIK, Gimnazija	DUB_Dub_Gim	GIMNAZIJA	1997-10-15	2016-04-07	18.4778	18-20	MOKOŠICA	DUBROVNIK-NERETVA	1	YES	YES	BOTH PARENTS	173.8
Dubrovnik-Neretva	DUBROVNIK, Gimnazija	DUB_Dub_Gim	GIMNAZIJA	1997-10-12	2016-04-07	18.486	18-20	KUPARI	DUBROVNIK-NERETVA	1	NO	NO	NEITHER	183.1
Dubrovnik-Neretva	DUBROVNIK, Gimnazija	DUB_Dub_Gim	GIMNAZIJA	1997-10-12	2016-04-07	18.486	18-20	DUBROVNIK	DUBROVNIK-NERETVA	3	YES	YES	BOTH PARENTS	177.7
Dubrovnik-Neretva	DUBROVNIK, Gimnazija	DUB_Dub_Gim	GIMNAZIJA	1997-10-07	2016-04-07	18.4997	18-20	DUBROVNIK	DUBROVNIK-NERETVA	3	NO	NO	NEITHER	176.4
Dubrovnik-Neretva	DUBROVNIK, Gimnazija	DUB_Dub_Gim	GIMNAZIJA	1997-10-02	2016-04-07	18.5133	18-20	DUBROVNIK	DUBROVNIK-NERETVA	3	YES	YES	BOTH PARENTS	180.5
Dubrovnik-Neretva	DUBROVNIK, Gimnazija	DUB_Dub_Gim	GIMNAZIJA	1997-09-24	2016-04-07	18.5352	18-20	DUBROVNIK	DUBROVNIK-NERETVA	3	YES	NO	ONE PARENT	187.9
Dubrovnik-Neretva	DUBROVNIK, Gimnazija	DUB_Dub_Gim	GIMNAZIJA	1997-09-24	2016-04-07	18.5352	18-20	DUBROVNIK	DUBROVNIK-NERETVA	3	NO	NO	NEITHER	181.6
Dubrovnik-Neretva	DUBROVNIK, Gimnazija	DUB_Dub_Gim	GIMNAZIJA	1997-09-13	2016-04-07	18.5654	18-20	ZATON	DUBROVNIK-NERETVA	1	NO	NO	NEITHER	166.6
Dubrovnik-Neretva	DUBROVNIK, Gimnazija	DUB_Dub_Gim	GIMNAZIJA	1997-09-13	2016-04-07	18.5654	18-20	DUBROVNIK	DUBROVNIK-NERETVA	3	YES	YES	BOTH PARENTS	190.9
Dubrovnik-Neretva	DUBROVNIK, Gimnazija	DUB_Dub_Gim	GIMNAZIJA	1997-09-08	2016-04-07	18.5791	18-20	DUBROVNIK	DUBROVNIK-NERETVA	3	NO	YES	ONE PARENT	169
Dubrovnik-Neretva	DUBROVNIK, Gimnazija	DUB_Dub_Gim	GIMNAZIJA	1997-07-23	2016-04-07	18.7077	18-20	DUBROVNIK	DUBROVNIK-NERETVA	3	YES	NO	ONE PARENT	186.3
Dubrovnik-Neretva	DUBROVNIK, Gimnazija	DUB_Dub_Gim	GIMNAZIJA	1997-07-11	2016-04-07	18.7406	18-20	DUBROVNIK	DUBROVNIK-NERETVA	3	YES	NO	ONE PARENT	175.3
Dubrovnik-Neretva	DUBROVNIK, Gimnazija	DUB_Dub_Gim	GIMNAZIJA	1997-06-28	2016-04-07	18.7762	18-20	DUBROVNIK	DUBROVNIK-NERETVA	3	NO	NO	NEITHER	174.9
Dubrovnik-Neretva	DUBROVNIK, Gimnazija	DUB_Dub_Gim	GIMNAZIJA	1997-06-22	2016-04-07	18.7926	18-20	KONAVLE	DUBROVNIK-NERETVA	1	NO	NO	NEITHER	188
Dubrovnik-Neretva	DUBROVNIK, Gimnazija	DUB_Dub_Gim	GIMNAZIJA	1997-06-20	2016-04-07	18.7981	18-20	KONAVLE	DUBROVNIK-NERETVA	1	YES	NO	ONE PARENT	185.6
Dubrovnik-Neretva	DUBROVNIK, Gimnazija	DUB_Dub_Gim	GIMNAZIJA	1997-06-10	2016-04-07	18.8255	18-20	DUBROVNIK	DUBROVNIK-NERETVA	3	YES	NO	ONE PARENT	189.5
Dubrovnik-Neretva	DUBROVNIK, Gimnazija	DUB_Dub_Gim	GIMNAZIJA	1997-06-01	2016-04-07	18.8501	18-20	DUBROVNIK	DUBROVNIK-NERETVA	3	YES	YES	BOTH PARENTS	184.5
Dubrovnik-Neretva	DUBROVNIK, Gimnazija	DUB_Dub_Gim	GIMNAZIJA	1997-05-30	2016-04-07	18.8556	18-20	POTOMJE	DUBROVNIK-NERETVA	1	YES	NO	ONE PARENT	187.2
Dubrovnik-Neretva	DUBROVNIK, Gimnazija	DUB_Dub_Gim	GIMNAZIJA	1997-05-30	2016-04-07	18.8556	18-20	DOLI	DUBROVNIK-NERETVA	1	NO	NO	NEITHER	180.5
Dubrovnik-Neretva	DUBROVNIK, Gimnazija	DUB_Dub_Gim	GIMNAZIJA	1997-05-20	2016-04-07	18.883	18-20	DUBROVNIK	DUBROVNIK-NERETVA	3	NO	NO	NEITHER	181.2
Dubrovnik-Neretva	DUBROVNIK, Gimnazija	DUB_Dub_Gim	GIMNAZIJA	1997-05-19	2016-04-07	18.8857	18-20	DUBROVNIK	DUBROVNIK-NERETVA	3	YES	NO	ONE PARENT	191.7
Dubrovnik-Neretva	DUBROVNIK, Gimnazija	DUB_Dub_Gim	GIMNAZIJA	1997-05-05	2016-04-07	18.924	18-20	DUBROVNIK	DUBROVNIK-NERETVA	3	YES	NO	ONE PARENT	180.1
Dubrovnik-Neretva	DUBROVNIK, Gimnazija	DUB_Dub_Gim	GIMNAZIJA	1997-04-30	2016-04-07	18.9377	18-20	BRGAT GORNJI	DUBROVNIK-NERETVA	1	YES	NO	ONE PARENT	180.5
Dubrovnik-Neretva	DUBROVNIK, Gimnazija	DUB_Dub_Gim	GIMNAZIJA	1997-04-28	2016-04-07	18.9432	18-20	DUBROVNIK	DUBROVNIK-NERETVA	3	YES	NO	ONE PARENT	169.3
Dubrovnik-Neretva	DUBROVNIK, Gimnazija	DUB_Dub_Gim	GIMNAZIJA	1997-04-23	2016-04-07	18.9569	18-20	DUBROVNIK	DUBROVNIK-NERETVA	3	YES	YES	BOTH PARENTS	186.4
Dubrovnik-Neretva	DUBROVNIK, Gimnazija	DUB_Dub_Gim	GIMNAZIJA	1997-04-19	2016-04-07	18.9678	18-20	DUBROVNIK	DUBROVNIK-NERETVA	3	NO	NO	NEITHER	187.5
Dubrovnik-Neretva	DUBROVNIK, Gimnazija	DUB_Dub_Gim	GIMNAZIJA	1997-02-12	2016-04-07	19.1485	18-20	DUBROVNIK	DUBROVNIK-NERETVA	3	NO	YES	ONE PARENT	175.6
Dubrovnik-Neretva	DUBROVNIK, Gimnazija	DUB_Dub_Gim	GIMNAZIJA	1996-09-08	2016-04-07	19.5784	18-20	DUBROVNIK	DUBROVNIK-NERETVA	3	YES	YES	BOTH PARENTS	183.7
Dubrovnik-Neretva	DUBROVNIK, Pomorsko-tehnička	DUB_Dub_Pom	OTHER	1997-05-28	2015-04-15	17.8809	17	DUBROVNIK	DUBROVNIK-NERETVA	3	NO	NO	NEITHER	193.3	96.3	196.3	49.8189	101.552
Dubrovnik-Neretva	DUBROVNIK, Pomorsko-tehnička	DUB_Dub_Pom	OTHER	1997-05-23	2015-04-15	17.8946	17	DUBROVNIK	DUBROVNIK-NERETVA	3	YES	NO	ONE PARENT	189.4	97	191	51.2144	100.845
Dubrovnik-Neretva	DUBROVNIK, Pomorsko-tehnička	DUB_Dub_Pom	OTHER	1997-05-01	2015-04-15	17.9548	17	DUBROVNIK	DUBROVNIK-NERETVA	3	YES	YES	BOTH PARENTS	188.8	94.1	180.7	49.8411	95.7097
Dubrovnik-Neretva	DUBROVNIK, Pomorsko-tehnička	DUB_Dub_Pom	OTHER	1997-04-17	2015-04-15	17.9932	17	DUBROVNIK	DUBROVNIK-NERETVA	3	NO	YES	ONE PARENT	179.4	97.4	180.7	54.2921	100.725
Dubrovnik-Neretva	DUBROVNIK, Pomorsko-tehnička	DUB_Dub_Pom	OTHER	1997-04-04	2015-04-15	18.0287	18-20	DUBROVNIK	DUBROVNIK-NERETVA	3	NO	NO	NEITHER	186.9	99.6	189.5	53.2905	101.391
Dubrovnik-Neretva	DUBROVNIK, Pomorsko-tehnička	DUB_Dub_Pom	OTHER	1997-04-02	2015-04-15	18.0342	18-20	ČIBAČA	DUBROVNIK-NERETVA	1	NO	NO	NEITHER	193.4	100	193.1	51.7063	99.8449
Dubrovnik-Neretva	DUBROVNIK, Pomorsko-tehnička	DUB_Dub_Pom	OTHER	1997-03-30	2015-04-15	18.0424	18-20	DUBROVNIK	DUBROVNIK-NERETVA	3	NO	NO	NEITHER	186.7	95.8	195.3	51.3123	104.606
Dubrovnik-Neretva	DUBROVNIK, Pomorsko-tehnička	DUB_Dub_Pom	OTHER	1997-03-25	2015-04-15	18.0561	18-20	DUBROVNIK	DUBROVNIK-NERETVA	3	NO	NO	NEITHER	181.6	96.2	183.3	52.9736	100.936
Dubrovnik-Neretva	DUBROVNIK, Pomorsko-tehnička	DUB_Dub_Pom	OTHER	1997-03-18	2015-04-15	18.0753	18-20	DUBROVNIK	DUBROVNIK-NERETVA	3	NO	NO	NEITHER	181.7	94	180.1	51.7336	99.1194
Dubrovnik-Neretva	DUBROVNIK, Pomorsko-tehnička	DUB_Dub_Pom	OTHER	1997-03-17	2015-04-15	18.078	18-20	DUBROVNIK	DUBROVNIK-NERETVA	3	NO	NO	NEITHER	185	98.2	180.9	53.0811	97.7838
Dubrovnik-Neretva	DUBROVNIK, Pomorsko-tehnička	DUB_Dub_Pom	OTHER	1997-03-12	2015-04-15	18.0917	18-20	DUBROVNIK	DUBROVNIK-NERETVA	3	YES	NO	ONE PARENT	172.5	95.3	169.8	55.2464	98.4348
Dubrovnik-Neretva	DUBROVNIK, Pomorsko-tehnička	DUB_Dub_Pom	OTHER	1997-03-11	2015-04-15	18.0945	18-20	DUBROVNIK	DUBROVNIK-NERETVA	3	NO	NO	NEITHER	186.3	93.6	196.7	50.2415	105.582
Dubrovnik-Neretva	DUBROVNIK, Pomorsko-tehnička	DUB_Dub_Pom	OTHER	1997-02-25	2015-04-15	18.1328	18-20	KOMIN	DUBROVNIK-NERETVA	1	YES	NO	ONE PARENT	188.6	99.6	184	52.8102	97.561
Dubrovnik-Neretva	DUBROVNIK, Pomorsko-tehnička	DUB_Dub_Pom	OTHER	1997-02-18	2015-04-15	18.152	18-20	DUBROVNIK	DUBROVNIK-NERETVA	3	YES	YES	BOTH PARENTS	174.5	94	173.5	53.8682	99.4269
Dubrovnik-Neretva	DUBROVNIK, Pomorsko-tehnička	DUB_Dub_Pom	OTHER	1997-02-17	2015-04-15	18.1547	18-20	DUBROVNIK	DUBROVNIK-NERETVA	3	NO	NO	NEITHER	181	96.3	175.4	53.2044	96.9061
Dubrovnik-Neretva	DUBROVNIK, Pomorsko-tehnička	DUB_Dub_Pom	OTHER	1997-02-07	2015-04-15	18.1821	18-20	DUBROVNIK	DUBROVNIK-NERETVA	3	YES	NO	ONE PARENT	177.3	95.6	179.2	53.9199	101.072
Dubrovnik-Neretva	DUBROVNIK, Pomorsko-tehnička	DUB_Dub_Pom	OTHER	1997-02-04	2015-04-15	18.1903	18-20	DUBROVNIK	DUBROVNIK-NERETVA	3	NO	YES	ONE PARENT	178.3	94.6	180	53.0566	100.953
Dubrovnik-Neretva	DUBROVNIK, Pomorsko-tehnička	DUB_Dub_Pom	OTHER	1997-01-28	2015-04-15	18.2094	18-20	SUDURAD	DUBROVNIK-NERETVA	1	NO	NO	NEITHER	179.1	92.5	186.4	51.6471	104.076
Dubrovnik-Neretva	DUBROVNIK, Pomorsko-tehnička	DUB_Dub_Pom	OTHER	1997-01-27	2015-04-15	18.2122	18-20	KONAVLE	DUBROVNIK-NERETVA	1	NO	YES	ONE PARENT	182.4	91.6	187.2	50.2193	102.632
Dubrovnik-Neretva	DUBROVNIK, Pomorsko-tehnička	DUB_Dub_Pom	OTHER	1997-01-27	2015-04-15	18.2122	18-20	DUBROVNIK	DUBROVNIK-NERETVA	3	YES	YES	BOTH PARENTS	174.6	89.6	173.4	51.3173	99.3127
Dubrovnik-Neretva	DUBROVNIK, Pomorsko-tehnička	DUB_Dub_Pom	OTHER	1997-01-18	2015-04-15	18.2368	18-20	DUBROVNIK	DUBROVNIK-NERETVA	3	YES	YES	BOTH PARENTS	185.1	95.5	186.8	51.5937	100.918
Dubrovnik-Neretva	DUBROVNIK, Pomorsko-tehnička	DUB_Dub_Pom	OTHER	1997-01-11	2015-04-15	18.256	18-20	DUBROVNIK	DUBROVNIK-NERETVA	3	NO	YES	ONE PARENT	185.4	97.2	191.6	52.4272	103.344
Dubrovnik-Neretva	DUBROVNIK, Pomorsko-tehnička	DUB_Dub_Pom	OTHER	1997-01-09	2015-04-15	18.2615	18-20	DUBROVNIK	DUBROVNIK-NERETVA	3	YES	YES	BOTH PARENTS	183.3	93.9	184.5	51.2275	100.655
Dubrovnik-Neretva	DUBROVNIK, Pomorsko-tehnička	DUB_Dub_Pom	OTHER	1997-01-06	2015-04-15	18.2697	18-20	DUBROVNIK	DUBROVNIK-NERETVA	3	YES	NO	ONE PARENT	182.4	91.3	182.2	50.0548	99.8904
Dubrovnik-Neretva	DUBROVNIK, Pomorsko-tehnička	DUB_Dub_Pom	OTHER	1996-12-29	2015-04-15	18.2916	18-20	DUBROVNIK	DUBROVNIK-NERETVA	3	NO	NO	NEITHER	180.8	95	175.1	52.5442	96.8473
[truncated: 1,055 more rows]

## Sheet: 6_GIRLS (domestic, Dalmatia)
Region of the school (Županija)	School	School code	School type	Date of birth	Date of measurement	Age (years)	Age category	Place of residence	County of residence	Population size of the place of residence	University education of parents			Anthropometry
[truncated: 282 more rows]
